# Supplementary material for: Characterization of Highly Mucus-Adherent Non-GMO Derivatives of Lacticaseibacillus rhamnosus GG
Source: Front Bioeng Biotechnol. 2020 Aug 19;8:1024. doi: 10.3389/fbioe.2020.01024 (PMC7466733; doi:10.3389/fbioe.2020.01024)
Supplement: FILE S4 — RNASeq count tables of L. rhamnosus GG, PB12 and PS24 and differential expression of L. rhamnosus GG vs. PS24 at OD2 and OD7. [file Table_4.XLSX]

## Sheet: counts for all strains
Gene	Old locus tag	Gene name	Gene product	LGG OD2	LGG OD7	PB12 OD 2	PB12 OD 7	PS24 OD 2	PS24 OD 7
LGG_RS00005	LGG_00001	dnaA	chromosomal replication initiator protein DnaA	8014.33	6758	6029	7307	6661	7481
LGG_RS00010	LGG_00002	dnaN	DNA polymerase III subunit beta	14456	12758	10918	13701	11159	14349
LGG_RS00015	LGG_00003	yaaA	RNA-binding protein	410.333	380.333	331	392	430	843
LGG_RS00020	LGG_00004	recF	DNA recombination protein RecF	3029.33	2892	2578	2862	3832	4868
LGG_RS00025	LGG_00005	gyrB	DNA gyrase subunit B	16013.3	11635.3	13795	11764	16335	14153
LGG_RS00030	LGG_00006	gyrA	DNA gyrase subunit A	28784.3	18658.3	23401	18811	29823	23617
LGG_RS00035	not predicted	NO NAME	hypothetical protein	5	4.66667	3	1	5	5
LGG_RS00040	LGG_00008	NO NAME	hypothetical protein	20.6667	14.6667	14	18	70	23
LGG_RS00050	LGG_00009	NO NAME	hypothetical protein	131.667	44.3333	74	42	36	44
LGG_RS00055	not predicted	NO NAME	deoxyribose-phosphate aldolase	114.333	51.6667	63	57	20	26
LGG_RS00060	LGG_00010	ssb1	single-stranded DNA-binding protein	63	47.6667	34	61	70	52
LGG_RS00065	LGG_00011	rpsF	30S ribosomal protein S6	11675.7	9979	12310	9689	11116	12611
LGG_RS00070	LGG_00012	ssb2	single-stranded DNA-binding protein	17194.7	14242.3	17683	13726	17316	26078
LGG_RS00075	LGG_00013	rpsR	30S ribosomal protein S18	10228.7	8419.33	11692	8326	9786	11686
LGG_RS00080	LGG_00015	pfpI	general stress protein	3104	4265.33	1978	3956	1574	11480
LGG_RS00085	LGG_00016	cydA	cytochrome D ubiquinol oxidase subunit I	148.667	349.333	78	325	435	1114
LGG_RS00090	LGG_00017	cydB	cytochrome C oxidase assembly protein	124	256.667	66	291	361	930
LGG_RS00095	LGG_00018	NO NAME	hypothetical protein	38.3333	73.3333	17	72	121	278
LGG_RS00100	LGG_00020	is1	transposase	0	0	0	0	0	0
LGG_RS00105	LGG_00021	NO NAME	abortive infection protein	54	72.6667	29	57	174	277
LGG_RS00110	LGG_00022	is2	transposase	0.333333	1.33333	2	0	66	333
LGG_RS00115	LGG_00023	NO NAME	membrane protein	29.6667	43.3333	16	44	2138	2482
LGG_RS00120	LGG_00024	NO NAME	hypothetical protein	47.6667	53	33	56	178	243
LGG_RS00125	LGG_00025	NO NAME	ABC transporter	15.3333	18.6667	13	21	113	152
LGG_RS00130	LGG_00026	is3	transposase	0	0	0	0	0	0
LGG_RS00135	LGG_00027	NO NAME	hypothetical protein	79.3333	100.667	56	103	71	62
LGG_RS00140	LGG_00028	NO NAME	ABC transporter ATP-binding protein	117.333	109	47	150	130	145
LGG_RS00145	LGG_00029	NO NAME	ammonium transporter	20.3333	17.3333	23	12	34	34
LGG_RS00150	LGG_00030	NO NAME	hypothetical protein	48	31.6667	40	34	50	72
LGG_RS00155	LGG_00031	p40	hypothetical protein	4619.67	779.333	2390	1252	2478	5356
LGG_RS00160	LGG_00032	NO NAME	peptide ABC transporter permease	686.667	373	707	467	742	520
LGG_RS00165	LGG_00033	ABC-NBD	macrolide ABC transporter ATP-binding protein	69.6667	54.3333	80	63	100	127
LGG_RS00170	LGG_00034	NO NAME	TetR family transcriptional regulator	1125	943.333	770	994	636	897
LGG_RS00175	LGG_00035	NO NAME	haloacid dehalogenase	2137.67	1649.33	1370	1838	1078	1502
LGG_RS00180	LGG_00036	NO NAME	hypothetical protein	600	446.667	353	474	350	529
LGG_RS00185	LGG_00037	NO NAME	permease	1273.33	921.667	834	1006	903	1162
LGG_RS00190	LGG_00038	NO NAME	membrane protein	468.667	443.333	332	436	398	701
LGG_RS00195	LGG_00039	maa	maltose O-acetyltransferase	920	967.667	616	956	1151	2291
LGG_RS00200	LGG_00040	NO NAME	hypothetical protein	649.667	692.667	452	686	878	1323
LGG_RS00205	LGG_00041	pepD	peptidase C69	18319.7	15305.3	14093	16439	10687	20498
LGG_RS00210	LGG_00042	NO NAME	membrane protein	385.333	332.667	297	325	406	613
LGG_RS00215	LGG_00043	NO NAME	hypothetical protein	132.667	111.667	98	120	155	180
LGG_RS00220	not predicted	NO NAME	hypothetical protein	150.333	133	100	126	130	179
LGG_RS00225	not predicted	NO NAME	hypothetical protein	113	99.6667	56	99	151	354
LGG_RS00230	not predicted	NO NAME	glycosyl hydrolase family 25	44	47	36	38	65	179
LGG_RS00235	not predicted	NO NAME	hypothetical protein	62.6667	81	57	81	173	329
LGG_RS00240	LGG_00047	NO NAME	hypothetical protein	90.3333	88.6667	42	92	263	403
LGG_RS00245	LGG_00048	azlC	azaleucine resistance protein AzlC	31	38.6667	27	46	29	38
LGG_RS00250	LGG_00049	NO NAME	branched-chain amino acid ABC transporter	21	21.3333	18	15	23	26
LGG_RS00255	LGG_00050	uidA	beta-glucuronidase	179	64.6667	73	107	58	83
LGG_RS00260	LGG_00051	galC	glycoside hydrolase	598	258.667	259	384	263	271
LGG_RS00265	LGG_00052	eda	ketohydroxyglutarate aldolase	1242.67	1010	889	1122	2210	2230
LGG_RS00270	LGG_00053	kdgK	2-dehydro-3-deoxygluconokinase	1324.67	956	961	1118	1206	858
LGG_RS00275	pseudo-gene	NO NAME	glucuronate isomerase	3629	2775.33	2366	3335	3008	2408
LGG_RS00280	LGG_00056	uxuA	mannonate dehydratase	2267.33	1534.67	1540	2051	1355	945
LGG_RS00285	LGG_00057	uxuB	dioxygenase	1722.33	1165.67	964	1673	740	686
LGG_RS00290	LGG_00058	NO NAME	transporter	460.333	192	169	338	149	125
LGG_RS00295	LGG_00059	kdgR	GntR family transcriptional regulator	1291.67	659.667	634	742	578	908
LGG_RS00300	LGG_00060	kdfK	2-dehydro-3-deoxygluconokinase	834.667	435.667	432	482	468	597
LGG_RS00305	LGG_00061	NO NAME	galactosidase	1735.67	1261.67	1044	1340	1190	1332
LGG_RS00310	LGG_00062	NO NAME	hypothetical protein	93	127.667	56	134	152	339
LGG_RS00315	LGG_00063	NO NAME	FMN-binding protein	407.333	491	217	403	410	1631
LGG_RS00320	LGG_00064	ypiB	MFS transporter permease	400.667	344	373	398	462	803
LGG_RS00325	LGG_00065	aes	alpha/beta hydrolase	31.3333	46.3333	30	54	36	73
LGG_RS00330	LGG_00066	NO NAME	TetR family transcriptional regulator	179.333	134.667	139	157	242	440
LGG_RS00335	LGG_00067	NO NAME	hypothetical protein	45	52.6667	40	46	85	174
LGG_RS00340	LGG_00068	NO NAME	membrane protein	1691	1039.33	1227	1052	1727	1462
LGG_RS00345	LGG_00069	NO NAME	TetR family transcriptional regulator	144.667	107	84	112	120	232
LGG_RS00350	LGG_00070	NO NAME	hypothetical protein	20688.3	3478.67	10222	3758	1019	1243
LGG_RS00355	LGG_00071	NO NAME	amidohydrolase	42330.3	8147	31316	9530	719	731
LGG_RS00360	LGG_00072	NO NAME	membrane protein	11011.7	2494.67	9813	2888	106	139
LGG_RS00365	LGG_00073	NO NAME	membrane protein	23916.7	5905	22656	6894	277	310
LGG_RS00370	LGG_00074	NO NAME	hypothetical protein	32.3333	60.3333	25	40	61	156
LGG_RS00375	LGG_00075	opuCd	amino acid ABC transporter permease	11496	9143.67	7781	9238	5086	5712
LGG_RS00380	LGG_00076	opuCc	glycine/betaine ABC transporter substrate-binding protein	16030.7	13015.3	11459	13413	7283	8179
LGG_RS00385	LGG_00077	opuCb	choline ABC transporter permease	8545.67	6874.33	6351	7139	3974	5958
LGG_RS00390	LGG_00078	opuCa	glycine/betaine ABC transporter ATP-binding protein	21414	18394.7	17101	19409	10110	12982
LGG_RS00395	LGG_00079	NO NAME	hypothetical protein	145.667	62.3333	123	74	124	152
LGG_RS00400	LGG_00080	zntR	MerR family transcriptional regulator	187.333	84	127	112	138	238
LGG_RS00405	LGG_00081	NO NAME	hypothetical protein	143.667	170.667	128	156	166	356
LGG_RS00410	LGG_00082	cadA	metal-transporting ATPase	94	82.3333	51	83	113	177
LGG_RS00415	LGG_00083	copZ	hypothetical protein	46	47	42	46	37	41
LGG_RS00420	LGG_00084	NO NAME	DNA-binding protein	170.333	150	122	189	189	235
LGG_RS00425	LGG_00085	flp	transcriptional regulator	410	362.333	319	367	500	960
LGG_RS00430	LGG_00086	NO NAME	TetR family transcriptional regulator	50.3333	48.6667	39	60	73	100
LGG_RS00435	LGG_00087	NO NAME	membrane protein	45.3333	26.6667	38	29	151	94
LGG_RS00440	LGG_00088	NO NAME	hypothetical protein	32.3333	25.6667	37	21	327	147
LGG_RS00445	LGG_00089	NO NAME	membrane protein	59.6667	53.6667	51	46	471	467
LGG_RS00450	pseudo-gene	NO NAME	PTS fructose transporter subunit IIB	64.6667	26.6667	36	38	39	47
LGG_RS00455	LGG_00092	frvA	PTS cellobiose transporter subunit IIA	29.3333	14.3333	13	21	21	17
LGG_RS00460	LGG_00093	NO NAME	alpha-mannosidase	116.667	56.6667	47	71	143	207
LGG_RS00465	LGG_00094	NO NAME	transcriptional regulator	47.6667	49.3333	28	66	54	90
LGG_RS00470	LGG_00095	bglB	6-phospho-beta-glucosidase	68.3333	67.3333	57	69	97	119
LGG_RS00475	LGG_00096	glk	ROK family transcriptional regulator	26	22.3333	18	22	31	15
LGG_RS00480	LGG_00098	trpA	tryptophan synthase subunit alpha	54	39	52	34	43	40
LGG_RS00485	LGG_00099	trpB	tryptophan synthase subunit beta	78.3333	62	81	68	33	22
LGG_RS00490	LGG_00100	trpF	N-(5'-phosphoribosyl)anthranilate isomerase	21.6667	16.3333	23	20	7	6
LGG_RS00495	LGG_00101	trpC	indole-3-glycerol-phosphate synthase	41	42	37	44	17	13
LGG_RS00500	LGG_00102	trpD	anthranilate phosphoribosyltransferase	22	18.3333	21	26	15	13
LGG_RS00505	not predicted	NO NAME	hypothetical protein	2.66667	4.66667	2	6	0	4
LGG_RS00510	LGG_00104	NO NAME	MFS transporter permease	27.6667	21	29	25	52	93
LGG_RS00515	LGG_00105	NO NAME	TetR family transcriptional regulator	105.333	114.333	60	127	118	125
LGG_RS00520	LGG_00106	NO NAME	hypothetical protein	141.333	151.667	121	138	240	162
LGG_RS00525	pseudo-gene	NO NAME	AbrB family transcriptional regulator	39.3333	42	33	52	148	110
LGG_RS00530	LGG_00107	rmlC	dTDP-4-dehydrorhamnose 3%2C5-epimerase	474.667	436	412	406	596	824
LGG_RS00535	LGG_00108	dapB	4-hydroxy-tetrahydrodipicolinate reductase	4819.67	4527	6023	4828	6591	5183
LGG_RS00540	LGG_00109	dapA	4-hydroxy-tetrahydrodipicolinate synthase	7556	7506.67	8205	7611	9198	6702
LGG_RS00545	LGG_00110	hipO	acetyldiaminopimelate deacetylase	8129	8335	8816	8450	10262	9036
LGG_RS00550	LGG_00111	dapD	2%2C3%2C4%2C5-tetrahydropyridine-2%2C6-carboxylate N-succinyltransferase	3431.33	3661.33	4049	3917	4631	4272
LGG_RS00555	LGG_00112	lysA	diaminopimelate decarboxylase	5204.33	4777	6245	4928	6682	8569
LGG_RS00560	LGG_00113	lysC	aspartate kinase	1527.67	1710.33	1781	1973	1783	3499
LGG_RS00565	LGG_00114	dapF	diaminopimelate epimerase	2351	2414.67	2941	2867	2562	3493
LGG_RS00570	LGG_00115	asd	aspartate-semialdehyde dehydrogenase	2717	2498.67	3595	3110	3138	3514
LGG_RS00575	LGG_00116	NO NAME	hypothetical protein	72	71.6667	74	83	71	145
LGG_RS00580	LGG_00117	NO NAME	transcriptional regulator	28.3333	57.6667	30	48	20	40
LGG_RS00585	not predicted	NO NAME	hypothetical protein	49.6667	50.6667	29	53	32	64
LGG_RS00590	LGG_00118	NO NAME	ADP-ribose pyrophosphatase	18.3333	22	13	26	46	69
LGG_RS00595	LGG_00119	NO NAME	peptide ABC transporter ATP-binding protein	83	116.667	72	151	129	203
LGG_RS00600	LGG_00120	NO NAME	hypothetical protein	237.333	302	163	346	258	362
LGG_RS00605	LGG_00121	yybT	hypothetical protein	6940.33	5652.33	5083	6405	6471	8406
LGG_RS00610	LGG_00122	rplI	50S ribosomal protein L9	3188.33	2547.33	2219	2692	3647	5892
LGG_RS00615	LGG_00123	dnaB	DNA helicase	3859.67	3856.67	2613	3747	1835	2444
LGG_RS00620	LGG_00124	NO NAME	hypothetical protein	2601.67	2433	1727	2231	1900	1963
LGG_RS00625	pseudo-gene	NO NAME	permease	85	65	60	104	79	91
LGG_RS00630	LGG_00126	murQ	N-acetylmuramic acid 6-phosphate etherase	61.6667	44.6667	34	59	51	66
LGG_RS00635	LGG_00127	yleB	hypothetical protein	52.6667	37.3333	24	42	64	63
LGG_RS00640	LGG_00128	NO NAME	RpiR family transcriptional regulator	338.333	380.667	285	344	565	764
LGG_RS00645	LGG_00129	NO NAME	TetR family transcriptional regulator	94.6667	168.667	122	168	145	225
LGG_RS00650	LGG_00130	psaA	macrolide ABC transporter ATP-binding protein	17	22	5	25	29	71
LGG_RS00655	LGG_00131	ileS	ABC transporter permease	143.667	152.667	126	173	283	389
LGG_RS00660	LGG_00132	NO NAME	amidohydrolase	121	94	102	97	125	159
LGG_RS00665	LGG_00133	purA	adenylosuccinate synthetase	21727.7	12501.3	14411	11062	5891	7934
LGG_RS00670	LGG_00135	cadA	metal-transporting ATPase	293.333	287.667	230	264	290	406
LGG_RS00675	LGG_00136	yozA	ArsR family transcriptional regulator	341.667	388	251	370	241	354
LGG_RS00680	LGG_00137	NO NAME	transporter	47	52.6667	42	51	81	93
LGG_RS00685	LGG_00138	nrdD	ribonucleoside triphosphate reductase	4486.33	3139.67	3291	3370	4756	3894
LGG_RS00690	LGG_00139	NO NAME	hypothetical protein	81	74	51	77	88	105
LGG_RS00695	LGG_00140	uvrB	membrane protein	1916	1770	714	1486	478	1599
LGG_RS00700	not predicted	NO NAME	hypothetical protein	76	94.6667	26	102	102	139
LGG_RS00705	not predicted	NO NAME	XRE family transcriptional regulator	183.667	205.333	138	213	265	340
LGG_RS00710	not predicted	NO NAME	hypothetical protein	67	71	49	52	90	92
LGG_RS00715	LGG_00143	NO NAME	hypothetical protein	0	0	0	0	0	0
LGG_RS00720	LGG_00144	is4	transposase	73.3333	95.3333	50	92	386	373
LGG_RS00725	LGG_00145	yveB	phospholipid phosphatase	1001	846	746	810	1029	990
LGG_RS00730	LGG_00146	NO NAME	peptidase S66	1718.33	1464	1324	1534	1463	1335
LGG_RS00735	LGG_00147	NO NAME	hypothetical protein	91.6667	97.3333	63	69	110	198
LGG_RS00740	LGG_00148	ddlA	D-alanine--D-alanine ligase	7426.33	5538	6240	5341	3880	2931
LGG_RS00745	LGG_00149	NO NAME	hypothetical protein	3.66667	5.66667	2	11	10	24
LGG_RS00750	LGG_00150	NO NAME	hypothetical protein	136.667	161.667	88	140	376	838
LGG_RS00755	LGG_00151	NO NAME	MFS transporter	1005	792	668	770	1746	3339
LGG_RS00760	LGG_00153	is6	transposase	20.3333	24.6667	21	31	25	39
LGG_RS00765	LGG_00154	NO NAME	hypothetical protein	88.3333	97.6667	94	103	126	121
LGG_RS00770	LGG_00155	baeS	two-component system sensor histidine kinase	726.667	708.333	655	789	514	568
LGG_RS00775	LGG_00156	beaR	two-component system response regulator	318.667	355	272	382	251	416
LGG_RS00780	LGG_00157	ogt	methylated-DNA--protein-cysteine methyltransferase	435.667	524.667	289	545	323	407
LGG_RS00785	LGG_00158	ldhD	lactate dehydrogenase	14600.3	12648.3	12208	13945	7253	12510
LGG_RS00790	LGG_00159	celB	PTS sugar transporter	311.667	608	93	1415	72	61
LGG_RS00795	LGG_00160	celA	PTS cellobiose transporter subunit IIA	412	820.667	114	1879	125	102
LGG_RS00800	LGG_00161	NO NAME	PTS cellobiose transporter subunit IIC	395.667	795.667	109	1906	123	121
LGG_RS00805	LGG_00162	celC	PTS cellobiose transporter subunit IIC	1084.67	2932	368	6785	407	332
LGG_RS00810	LGG_00163	bglA	6-phospho-beta-glucosidase	923	3491.33	425	8132	504	627
LGG_RS00815	LGG_00164	yydk	GntR family transcriptional regulator	454	429	442	629	319	376
LGG_RS00820	LGG_00165	NO NAME	hypothetical protein	1039.33	420	1184	263	1866	1367
LGG_RS00825	LGG_00166	NO NAME	membrane protein	832	374	1138	249	1603	1485
LGG_RS00830	LGG_00167	NO NAME	hypothetical protein	384.667	180	478	113	744	1000
LGG_RS00835	LGG_00168	pbuO	guanine permease	32153.7	6096.33	31128	4384	397	413
LGG_RS00840	LGG_00169	NO NAME	sulfur reduction protein DsrE	334.667	315	251	279	450	682
LGG_RS00845	not predicted	NO NAME	hypothetical protein	178.333	193.667	132	176	256	394
LGG_RS00850	LGG_00171	NO NAME	hypothetical protein	306.333	391.333	238	320	542	600
LGG_RS00855	LGG_00172	tauB	taurine ABC transporter ATP-binding protein	97	134.333	70	128	238	289
LGG_RS00860	LGG_00173	tauA	sulfonate ABC transporter substrate-binding protein	113.667	131.667	80	127	265	361
LGG_RS00865	LGG_00174	tauC	taurine ABC transporter permease	81	91	49	90	207	263
LGG_RS00870	LGG_00175	naoX	pyridine nucleotide-disulfide oxidoreductase	219.333	232	149	230	376	632
LGG_RS00875	LGG_00176	NO NAME	membrane protein	34.3333	34	28	34	77	186
LGG_RS00880	LGG_00177	NO NAME	LysR family transcriptional regulator	637.333	642.333	410	628	1210	1295
LGG_RS00885	LGG_00178	mhqA	glyoxalase	184.333	265.333	135	272	604	845
LGG_RS00890	LGG_00179	NO NAME	hypothetical protein	126	133	84	158	98	147
LGG_RS00895	LGG_00180	yoaA	alanine acetyltransferase	349.667	370	236	408	428	853
LGG_RS00900	LGG_00181	NO NAME	hypothetical protein	51	27	51	31	161	140
LGG_RS00905	LGG_00182	NO NAME	hypothetical protein	18	10.3333	19	13	50	24
LGG_RS00910	LGG_00183	yqcC	cell surface protein	67.3333	40.3333	46	43	154	106
LGG_RS00915	LGG_00184	ynjC	cell surface protein	78.6667	52	67	59	171	132
LGG_RS00920	LGG_00185	NO NAME	hypothetical protein	45.3333	75.6667	34	76	50	82
LGG_RS00925	LGG_00186	NO NAME	hypothetical protein	410	611.667	214	707	377	613
LGG_RS00930	LGG_00187	NO NAME	membrane protein	1436	911.667	985	1001	1232	1666
LGG_RS00935	LGG_00188	NO NAME	hypothetical protein	1054	1583	732	1529	713	1371
LGG_RS00940	LGG_00189	ycaJ	ATPase AAA	7166.67	3462.67	2338	3568	2840	3910
LGG_RS00945	LGG_00190	ackA	acetate kinase	5268	2774.33	1839	2776	2802	3300
LGG_RS00950	LGG_00191	glpR	alkaline phosphatase	149.333	235.333	129	225	237	481
LGG_RS00955	LGG_00192	NO NAME	xylulokinase	135.667	70.3333	37	110	58	98
LGG_RS00960	LGG_00193	fbaA	fructose-bisphosphate aldolase	168	145	84	164	80	181
LGG_RS00965	LGG_00194	ulaA	PTS ascorbate transporter subunit IIC	308.333	261.667	179	314	180	242
LGG_RS00970	LGG_00195	pphA	hypothetical protein	1708.67	1657.67	1461	1701	1459	1591
LGG_RS00975	LGG_00196	NO NAME	endonuclease III	1332.67	1288	1155	1358	1192	1413
LGG_RS00980	LGG_00197	NO NAME	MFS transporter permease	3057.33	3005.67	2580	3078	2725	3637
LGG_RS00985	LGG_00200	xfp	phosphoketolase	61654	25409	43754	24928	15573	18099
LGG_RS00990	LGG_00201	oppA	peptide ABC transporter substrate-binding protein	4129	8190.33	2854	7290	675	1435
LGG_RS00995	LGG_00202	NO NAME	hypothetical protein	28	39.3333	25	47	61	80
LGG_RS01000	LGG_00203	NO NAME	hypothetical protein	22.3333	36.6667	18	35	51	63
LGG_RS01005	LGG_00204	NO NAME	PTS mannose transporter subunit IID	41.3333	46	35	42	57	49
LGG_RS01010	LGG_00205	abc	ABC transporter ATP-binding protein	37.6667	45.6667	36	41	57	54
LGG_RS01015	LGG_00206	NO NAME	hypothetical protein	53.6667	61.6667	40	73	118	116
LGG_RS01020	LGG_00207	NO NAME	NUDIX hydrolase	332.667	424	194	418	332	600
LGG_RS01025	LGG_00208	NO NAME	hypothetical protein	2823.33	3063.67	1918	3069	2633	6561
LGG_RS01030	LGG_00209	NO NAME	ABC transporter permease	417.667	416.667	262	328	422	651
LGG_RS01035	LGG_00210	rrg	XRE family transcriptional regulator	301	384.333	204	387	218	437
LGG_RS01040	LGG_00211	NO NAME	FAD-dependent oxidoreductase	4804	4517.33	2577	4440	3097	4629
LGG_RS01045	LGG_00212	nox	NADH oxidase	3121.33	3324.33	2080	3393	2336	3270
LGG_RS01050	LGG_00213	NO NAME	hypothetical protein	2637.67	2185.67	1700	2072	1477	1948
LGG_RS01055	LGG_00215	NO NAME	hypothetical protein	3010.33	1634.67	2439	1733	1758	1504
LGG_RS01060	LGG_00216	yxaA	permease	1727.67	1149.67	1385	1187	1150	992
LGG_RS01065	LGG_00217	ywjH	membrane protein	796.667	484.667	599	487	651	625
LGG_RS01070	LGG_00218	NO NAME	hypothetical protein	1615.33	1561	1143	1720	1186	2777
LGG_RS01075	LGG_00219	NO NAME	membrane protein	948.667	851.333	618	815	1149	1493
LGG_RS01080	LGG_00220	NO NAME	hypothetical protein	93	112.667	62	110	189	212
LGG_RS01085	LGG_00221	fldA	flavodoxin	600.333	432.667	345	421	490	518
LGG_RS01090	LGG_00222	NO NAME	hypothetical protein	736.667	600	439	568	758	1624
LGG_RS01095	LGG_00223	NO NAME	hypothetical protein	1137.67	1004.33	766	924	1155	2332
LGG_RS01100	LGG_00225	serA	2-hydroxyacid dehydrogenase	7211.33	7483.67	4320	7400	4894	10424
LGG_RS01105	LGG_00226	NO NAME	sugar ABC transporter substrate-binding protein	999.333	994	602	1029	683	3912
LGG_RS01110	LGG_00227	ydaS	membrane protein	32.3333	30	34	34	64	112
LGG_RS01115	LGG_00228	NO NAME	hypothetical protein	101.667	86	74	88	211	311
LGG_RS01120	LGG_00229	NO NAME	hypothetical protein	38.6667	35.6667	28	41	90	100
LGG_RS01125	LGG_00230	asp1	alkaline-shock protein	133.667	123.667	103	157	234	346
LGG_RS01130	LGG_00231	asp2	alkaline-shock protein	346.667	268.667	222	263	446	514
LGG_RS01135	LGG_00232	NO NAME	haloacid dehalogenase	151	198.333	134	215	194	179
LGG_RS01140	LGG_00233	NO NAME	membrane protein	7509.67	6031	8592	6952	4142	3259
LGG_RS01145	LGG_00234	NO NAME	hypothetical protein	6193.33	4617	7194	5003	3553	3282
LGG_RS01150	not predicted	NO NAME	transposase	0	0	0	0	0	0
LGG_RS01155	LGG_00236	is8	transposase	378.333	273.667	449	298	220	213
LGG_RS01160	LGG_00238	pcp	pyrrolidone-carboxylate peptidase	8309.67	6317.33	10570	6820	5122	4271
LGG_RS01165	LGG_00239	pks	NADP oxidoreductase	1063	1253	730	1377	911	1391
LGG_RS01170	pseudo-gene	NO NAME	hypothetical protein	377.333	480	243	498	251	498
LGG_RS01175	LGG_00240	cobQ	cobyric acid synthase	4328.67	4265	3144	3960	1827	2414
LGG_RS01180	LGG_00241	NO NAME	hypothetical protein	5078	4807	3624	4765	3025	4918
LGG_RS01185	LGG_00242	rsmG	16S rRNA methyltransferase	4313	4293.33	3000	3995	3410	4574
LGG_RS01190	LGG_00243	noc	nucleoid occlusion protein	6795.33	6980.33	4446	6731	5343	4419
LGG_RS01195	LGG_00244	soj	sporulation initiation inhibitor Soj	7692.33	7132	5153	6817	5061	3900
LGG_RS01200	LGG_00245	parB	chromosome partitioning protein ParB	14590.3	11241.3	10033	10639	8433	5949
LGG_RS01205	LGG_00246	NO NAME	hypothetical protein	3911.33	3069.33	2623	2830	2341	1354
LGG_RS01210	LGG_00247	ychF	GTP-binding protein	20660.7	14637	13382	13235	11005	7860
LGG_RS01215	LGG_00248	NO NAME	membrane protein	12213	8233.67	8030	7613	7305	6335
LGG_RS01220	LGG_00249	guaB	inosine-5-monophosphate dehydrogenase	10323.7	10890	8590	11111	1933	1784
LGG_RS01225	LGG_00251	NO NAME	hypothetical protein	211	158.333	135	181	261	432
LGG_RS01230	LGG_00252	vanR	two-component system response regulator	6037.67	5689.33	5229	6465	3032	3189
LGG_RS01235	LGG_00253	vanS	two-component system sensor histidine kinase	15000	10921	14003	11771	7228	5728
LGG_RS01240	LGG_00254	dacA	D-alanyl-D-alanine carboxypeptidase	22914	15264.3	20619	16366	11548	7927
LGG_RS01245	LGG_00256	greA	transcription elongation factor GreA	4230	3789	3516	3923	2952	2065
LGG_RS01250	LGG_00257	murE	UDP-N-acetylmuramoylalanyl-D-glutamate--2%2C 6-diaminopimelate ligase	15581.7	14444.7	12450	15395	11410	9737
LGG_RS01255	LGG_00258	racD	aspartate racemase	10719.7	9426.67	8055	9235	6929	5968
LGG_RS01260	LGG_00259	dkgA	2%2C5-diketo-D-gluconic acid reductase	7642	6851	5261	6886	5408	12724
LGG_RS01265	LGG_00260	iolR	alkaline phosphatase	516.667	442.667	358	438	889	972
LGG_RS01270	LGG_00261	iolT	MFS transporter	62	43	40	34	76	65
LGG_RS01275	LGG_00262	iolA	methylmalonate-semialdehyde dehydrogenase	157.333	64.3333	33	82	40	46
LGG_RS01280	LGG_00263	iolB	5-deoxy-glucuronate isomerase	149.333	58.3333	42	95	34	40
LGG_RS01285	LGG_00264	iolC	5-dehydro-2-deoxygluconokinase	124.667	67	48	103	55	57
LGG_RS01290	LGG_00265	iolD	3D-(3%2C5/4)-trihydroxycyclohexane-1%2C2-dione hydrolase	154.667	155.667	89	211	154	180
LGG_RS01295	LGG_00266	iolG1	inositol 2-dehydrogenase	99.3333	97.6667	69	124	96	86
LGG_RS01300	LGG_00267	iolG2	inositol 2-dehydrogenase	103.667	88.6667	76	130	131	101
LGG_RS01305	LGG_00268	iolE	myo-inosose-2 dehydratase	146.667	133.333	93	155	174	140
LGG_RS01310	LGG_00269	iolJ	fructose-bisphosphate aldolase	103.667	89.6667	66	97	140	140
LGG_RS01315	LGG_00270	iolK	tautomerase	62.3333	56.3333	32	73	83	66
LGG_RS01320	LGG_00271	iolI	xylose isomerase	22	27.6667	12	21	34	33
LGG_RS01325	LGG_00272	iolH	protein iolH	58.3333	73.6667	46	83	107	102
LGG_RS01330	LGG_00273	gntR	RpiR family transcriptional regulator	487	452.667	368	378	928	1359
LGG_RS01335	LGG_00274	gnd	6-phosphogluconate dehydrogenase	654	596.667	426	552	896	1309
LGG_RS01340	LGG_00275	gntK	gluconokinase	2075	1481	1309	1459	2284	2445
LGG_RS01345	LGG_00277	gntP	gluconate permease	265.333	204.667	150	235	249	346
LGG_RS01350	LGG_00278	NO NAME	hypothetical protein	4719	2851.33	3475	3083	4014	3271
LGG_RS01355	LGG_00279	welA	dTDP-rhamnosyl transferase	3631	2337.33	3223	2744	3402	2274
LGG_RS01360	LGG_00280	welB	alpha-L-Rha alpha-1%2C3-L-rhamnosyltransferase	2573.33	1814	2052	1923	2377	1780
LGG_RS01365	LGG_00281	welC	alpha-L-Rha alpha-1%2C3-L-rhamnosyltransferase	4538.33	3133.33	3585	3274	3907	2448
LGG_RS01370	LGG_00282	eps1	polysaccharide transporter%2C PST family protein	2343.67	1651.67	1952	1582	2028	1879
LGG_RS01375	LGG_00283	eps2	hypothetical protein	2404.33	1455	2026	1453	2074	1527
LGG_RS01380	LGG_00284	NO NAME	hypothetical protein	1407.67	926	1232	887	1114	806
LGG_RS01385	LGG_00285	znuC	ABC transporter ATP-binding protein	2495.33	1864	2209	1732	2328	1989
LGG_RS01390	LGG_00286	znuB	ABC transporter	1402.33	1145	1236	1007	1564	1540
LGG_RS01395	LGG_00287	NO NAME	phosphoesterase	5433.67	4677	4725	4740	3152	2402
LGG_RS01400	LGG_00288	mmsB	oxidoreductase	5111.33	4427.33	4222	4635	2633	2365
LGG_RS01405	LGG_00289	pepF	oligopeptidase PepB	7175	6580.33	5817	7063	3786	4219
LGG_RS01410	LGG_00290	lytR	LytR family transcriptional regulator	2610	2215.67	1829	2339	1232	1886
LGG_RS01415	LGG_00292	brnQ	branched-chain amino acid transporter II carrier protein	219	237	229	265	195	199
LGG_RS01420	LGG_00293	NO NAME	hydrolase	136.667	31	113	33	1126	6151
LGG_RS01425	LGG_00294	glcR	DeoR family transcriptional regulator	1361	1261	1056	1188	1506	2009
LGG_RS01430	LGG_00295	NO NAME	glycosyl transferase family 2	1627.33	1338	1252	1360	1422	2028
LGG_RS01435	LGG_00296	NO NAME	membrane protein	1070	704	821	715	878	858
LGG_RS01440	LGG_00297	NO NAME	hypothetical protein	626	425.333	407	436	606	931
LGG_RS01445	LGG_00298	spi	signal peptidase	2008.67	1310.67	1386	1494	1176	1792
LGG_RS01450	LGG_00299	NO NAME	ADP-ribosylglycohydrolase	412.333	352.333	218	482	413	1050
LGG_RS01455	LGG_00300	ABC-NBD	multidrug ABC transporter ATP-binding protein	916.333	1047.67	1296	1108	1294	1495
LGG_RS01460	LGG_00301	NO NAME	methylase	305.667	377.667	245	433	330	560
LGG_RS01465	LGG_03012	16S rRNA	16S ribosomal RNA	0	0	0	0	0	0
LGG_RS01470	LGG_03002	23S rRNA	23S ribosomal RNA	0.666667	0	0	0	0	0
LGG_RS01475	LGG_03007	5S rRNA	5S ribosomal RNA	0	0	0	0	0	0
LGG_RS01480	not predicted	NO NAME	thiol-disulfide isomerase	108	126.333	67	138	114	308
LGG_RS01485	LGG_00311	labL	membrane protein	377.667	418.667	269	429	520	910
LGG_RS01490	LGG_00312	NO NAME	membrane protein	217.667	189.667	152	210	294	463
LGG_RS01495	LGG_00313	livJ	branched-chain amino acid ABC transporter substrate-binding protein	186.333	172.667	194	149	142	126
LGG_RS01500	LGG_00314	livH	ABC transporter permease	122	107	116	111	86	74
LGG_RS01505	LGG_00315	livM	branched-chain amino acid ABC transporter permease	83.6667	69.3333	86	84	76	53
LGG_RS01510	LGG_00316	livG	branched-chain amino acid ABC transporter ATP-binding protein	104.333	78	116	83	51	66
LGG_RS01515	LGG_00317	livF	branched-chain amino acid ABC transporter ATP-binding protein	136	130.333	133	132	140	103
LGG_RS01520	LGG_00318	yvdC	hypothetical protein	43	41.3333	39	33	28	44
LGG_RS01525	LGG_00319	NO NAME	acyltransferase	1418.33	1552.33	940	1712	769	1655
LGG_RS01530	LGG_00320	pts	PTS cellobiose transporter subunit IIC	1138	1532.67	778	1654	850	2298
LGG_RS01535	LGG_00321	deoC	deoxyribose-phosphate aldolase	3969.67	2972	2083	3312	2535	4422
LGG_RS01540	LGG_00322	deoB	phosphopentomutase	9446.67	6437	4755	7107	5443	8356
LGG_RS01545	LGG_00323	deoD	purine nucleoside phosphorylase	6137.33	4477.33	3140	5150	3929	4735
LGG_RS01550	LGG_00324	p75	glycoside hydrolase	50825.7	47865	34896	47518	39195	73811
LGG_RS01555	LGG_00325	nox	pyridine nucleotide-disulfide oxidoreductase	22542.3	28461.3	12399	31910	2475	12039
LGG_RS01560	LGG_00326	NO NAME	hypothetical protein	411.333	371.667	334	352	221	190
LGG_RS01565	LGG_00327	NO NAME	hypothetical protein	359.667	341.667	266	340	221	180
LGG_RS01570	LGG_00328	srmB	ATP-dependent helicase	822	914	638	874	565	671
LGG_RS01575	LGG_00329	upgB	ABC transporter substrate-binding protein	2584	2422.67	1610	2356	1602	2788
LGG_RS01580	LGG_00330	NO NAME	hypothetical protein	1580	1407.67	1108	1263	1122	1397
LGG_RS01585	LGG_00331	manA	mannose-6-phosphate isomerase	13594	11785	8078	11551	4230	6155
LGG_RS01590	LGG_00332	gntR	GntR family transcriptional regulator	10492.3	5988.33	3672	7168	4293	3858
LGG_RS01595	LGG_00333	agaS	tagatose-6-phosphate ketose	23092	12653	8124	14911	8825	6678
LGG_RS01600	LGG_00334	nagA	N-acetylglucosamine-6-phosphate deacetylase	22126.7	12368.7	7778	14649	9214	5883
LGG_RS01605	LGG_00336	bgaC	beta-galactosidase	26562.3	35792	10292	23501	25719	50811
LGG_RS01610	LGG_00337	manB	PTS mannose transporter subunit IIAB	7772.33	12048.3	3404	8133	8496	14814
LGG_RS01615	LGG_00338	manC	PTS fructose transporter subunit IIC	6314	9762.33	2918	6507	7786	13469
LGG_RS01620	LGG_00339	manD	PTS fructose transporter subunit IID	7817.67	10075	3185	7155	9137	17138
LGG_RS01625	LGG_00340	manA	PTS fructose transporter subunit IIA	5826	6819.33	2313	4922	6258	10238
LGG_RS01630	LGG_00341	lacC	tagatose-6-phosphate kinase	11547	4532	1618	6304	1301	1946
LGG_RS01635	LGG_00342	srlD	sorbitol-6-phosphate 2-dehydrogenase	11946.7	3970.33	1499	5989	1140	2124
LGG_RS01640	LGG_00343	gatC	PTS galactitol transporter subunit IIC	18689.3	4115	2935	6092	1208	1883
LGG_RS01645	LGG_00344	is9	transposase	2	1.33333	0	2	2	2
LGG_RS01650	LGG_00345	gatA	PTS galactitol transporter subunit IIA	4268	1579	2035	2099	332	1148
LGG_RS01655	LGG_00346	gatB	PTS galactitol transporter subunit IIB	2528.67	958.667	938	1331	209	696
LGG_RS01660	LGG_00347	NO NAME	hypothetical protein	1063	683.667	513	764	584	876
LGG_RS01665	LGG_00348	yohJ	glycosyl transferase family 1	2630	2421.67	1808	2642	2105	2360
LGG_RS01670	LGG_00349	yohH	glycosyl transferase family 1	3134.67	2816	2193	3153	2228	2197
LGG_RS01675	LGG_00350	NO NAME	hypothetical protein	4255.33	3609.67	3056	3614	2448	2365
LGG_RS01680	LGG_00351	patB	aminotransferase	138.667	104	81	98	294	282
LGG_RS01685	LGG_00352	ypdF	aminopeptidase	46.3333	54.6667	20	32	99	159
LGG_RS01690	LGG_00353	pts	PTS lactose transporter subunit IIC	44.6667	36.3333	19	31	107	120
LGG_RS01695	LGG_00354	celA	PTS lactose transporter subunit IIB	11	5.66667	3	3	14	17
LGG_RS01700	LGG_00355	chbA	PTS lactose transporter subunit IIA	6.66667	7	2	4	17	27
LGG_RS01705	LGG_00356	ypdE	aminopeptidase	23	12.6667	5	10	57	64
LGG_RS01710	LGG_00357	NO NAME	transcriptional antiterminator	43.3333	18.3333	14	24	75	91
LGG_RS01715	LGG_00358	pepT	peptidase M20	603.667	1191.33	475	1114	290	647
LGG_RS01720	LGG_00359	oppA	peptide ABC transporter substrate-binding protein	1291.33	1927.67	958	1928	331	540
LGG_RS01725	LGG_00360	yhbS	N-acetyltransferase GCN5	1612	1074.67	1255	1020	1056	877
LGG_RS01730	LGG_00361	NO NAME	hypothetical protein	845.667	674	596	649	733	784
LGG_RS01735	LGG_00362	nisT	ABC transporter ATP-binding protein	147.667	198.333	98	201	110	210
LGG_RS01740	LGG_00363	NO NAME	cobalt ABC transporter permease	7.33333	5.66667	6	9	21	15
LGG_RS01745	LGG_00364	cbiO	cobalt ABC transporter ATP-binding protein	10.6667	7	3	7	35	46
LGG_RS01750	LGG_00365	cbiQ	cobalt ABC transporter permease	5.33333	4.66667	5	10	10	20
LGG_RS01755	LGG_00366	tenA	thiaminase II	6.33333	5.33333	1	5	6	15
LGG_RS01760	LGG_00367	thiW	hydroxyethylthiazole permease	3.33333	2.33333	3	3	6	11
LGG_RS01765	LGG_00368	thiM	hydroxyethylthiazole kinase	16	13.6667	9	12	24	29
LGG_RS01770	LGG_00369	thiE	thiamine-phosphate pyrophosphorylase	20	13.6667	11	16	36	31
LGG_RS01775	LGG_00370	thiD	phosphomethylpyrimidine kinase	115.667	115.333	83	105	152	222
LGG_RS01780	LGG_00371	ycaM	amino acid permease	537.333	316.333	542	314	346	610
LGG_RS01785	LGG_00372	rbsR	LacI family transcriptional regulator	2700	181	743	181	286	461
LGG_RS01790	LGG_00373	rbsK	ribokinase	1797.67	245.667	406	296	452	670
LGG_RS01795	LGG_00374	NO NAME	XRE family transcriptional regulator	85.3333	58	50	47	66	84
LGG_RS01800	not predicted	NO NAME	hypothetical protein	119.333	92.6667	89	114	91	60
LGG_RS01805	LGG_00376	is10	transposase	10	11.3333	13	9	4	2
LGG_RS01810	not predicted	NO NAME	hypothetical protein	849.667	701	752	844	268	163
LGG_RS01815	LGG_00377	NO NAME	hypothetical protein	1043	911.333	1023	1143	102	65
LGG_RS01820	LGG_00379	NO NAME	hypothetical protein	14	15.3333	10	10	24	38
LGG_RS01825	LGG_00380	NO NAME	membrane protein	41	37.3333	26	25	71	108
LGG_RS01830	LGG_00381	NO NAME	hypothetical protein	55.6667	30	54	35	120	82
LGG_RS01835	LGG_00382	pbp	penicillin-binding protein	4363.33	2257.67	3798	2626	4376	2828
LGG_RS01840	LGG_00383	is11	transposase	0	0	0	0	0	0
LGG_RS01845	not predicted	NO NAME	hypothetical protein	115.667	79	58	83	257	388
LGG_RS01850	LGG_00385	NO NAME	hypothetical protein	20	17.3333	21	27	24	25
LGG_RS01855	LGG_00386	NO NAME	MFS transporter permease	517.333	369.333	449	314	1003	783
LGG_RS01860	LGG_00387	slyA	MarR family transcriptional regulator	223.667	153.667	174	106	323	239
LGG_RS01865	LGG_00388	NO NAME	hypothetical protein	378.667	236.333	275	193	558	359
LGG_RS01870	LGG_00389	NO NAME	hypothetical protein	151	92.6667	97	58	239	171
LGG_RS01875	LGG_00390	aroE	DNA-binding protein	149.667	91	123	61	298	254
LGG_RS01880	LGG_00391	NO NAME	hypothetical protein	19	15	10	22	50	55
LGG_RS01885	LGG_00392	NO NAME	hypothetical protein	36	33.3333	28	46	103	100
LGG_RS01890	LGG_00393	manR	transcription antiterminator	63.6667	57.6667	25	53	40	56
LGG_RS01895	LGG_00394	NO NAME	PTS sugar transporter subunit IIABC	9	7	6	12	16	15
LGG_RS01900	LGG_00395	frwA1	PTS fructose transporter subunit IIA	30.3333	29.3333	20	37	25	22
LGG_RS01905	LGG_00396	frwB1	PTS fructose transporter subunit IIB	27.3333	23.3333	23	29	27	19
LGG_RS01910	LGG_00397	frwC1	PTS fructose transporter subunit IIC	92	83.3333	56	90	102	105
LGG_RS01915	LGG_00398	tal	fructose-6-phosphate aldolase	105	80.3333	83	107	68	65
LGG_RS01920	LGG_00399	rpe	allulose-6-phosphate 3-epimerase	75	62	44	72	45	46
LGG_RS01925	LGG_00400	ulaA	PTS lactose transporter subunit IIA	46.3333	43.6667	29	47	21	18
LGG_RS01930	LGG_00401	ulaB	PTS lactose transporter subunit IIB	39.3333	37.3333	31	48	31	24
LGG_RS01935	LGG_00402	pts	PTS trehalose transporter subunit IIBC	50.3333	37	29	41	36	46
LGG_RS01940	LGG_00403	is12	transposase	0	0	0	0	0	0
LGG_RS01945	LGG_00404	ulaC	PTS ascorbate transporter subunit IIC	153.667	92.6667	92	95	421	414
LGG_RS01950	LGG_00405	tktN	transketolase	127	99.3333	82	109	209	280
LGG_RS01955	LGG_00406	tktC	transketolase	98.3333	83.3333	70	92	180	218
LGG_RS01960	LGG_00407	scrK	fructokinase	929.333	561	343	735	327	415
LGG_RS01965	LGG_00408	lacR	Lactose phosphotransferase system repressor	347	311	215	304	412	534
LGG_RS01970	LGG_00409	frwA2	PTS fructose transporter subunit IIA	70.3333	17.3333	24	24	26	27
LGG_RS01975	LGG_00410	frwB2	PTS fructose transporter subunit IIB	56	16	28	15	19	22
LGG_RS01980	LGG_00411	frwC2	PTS fructose IIC component	160	78	95	84	212	229
LGG_RS01985	LGG_00412	is13	transposase	0	0	0	0	0	0
LGG_RS01990	LGG_00413	fba	fructose-bisphosphate aldolase	130.333	69.3333	61	69	170	137
LGG_RS01995	LGG_00414	gatY	hypothetical protein	561.667	537	372	504	574	976
LGG_RS02000	LGG_00415	pts	PTS mannose transporter subunit IIB	7567.33	1056.33	1790	4225	1923	3110
LGG_RS02005	LGG_00416	pts	PTS mannose transporter subunit IIB	7286.67	795.333	1484	3165	1449	1861
LGG_RS02010	LGG_00417	manZ	PTS mannose transporter subunit IICD	35215.3	2496.33	7057	9037	4885	8733
LGG_RS02015	LGG_00418	tal	transaldolase	27408	1393.67	6511	4963	3003	5285
LGG_RS02020	LGG_00419	NO NAME	LacI family transcriptional regulator	1707	195.333	446	296	92	120
LGG_RS02025	LGG_00420	yhfZ	GntR family transcriptional regulator	3996.67	573.667	1552	636	484	795
LGG_RS02030	LGG_00421	NO NAME	hypothetical protein	1275.33	208	377	185	163	323
LGG_RS02035	LGG_00422	NO NAME	hypothetical protein	1020.67	176.333	322	163	139	218
LGG_RS02040	LGG_00423	NO NAME	membrane protein	817.667	130.333	320	141	350	294
LGG_RS02045	LGG_00424	php	hydrolase	613.667	137	301	146	346	265
LGG_RS02050	LGG_00425	yhfS	hypothetical protein	589.333	122	309	155	348	247
LGG_RS02055	LGG_00426	yhfX	amino acid racemase	512	137	303	163	346	282
LGG_RS02060	LGG_00427	YHFW	mutase	618.667	240.333	374	261	477	438
LGG_RS02065	LGG_00428	ilvH	DNA-directed RNA polymerase subunit delta	7573.33	2177.67	2545	2402	1447	909
LGG_RS02070	LGG_00429	NO NAME	membrane protein	5185.33	1526	1875	1686	1190	849
LGG_RS02075	LGG_00430	cbiO	heme ABC transporter ATP-binding protein	17061.3	4868.33	5720	5274	4338	2500
LGG_RS02080	LGG_00431	cbiQ	cobalt ABC transporter permease	7597.33	2081.33	1926	2275	1895	1061
LGG_RS02085	not predicted	NO NAME	hypothetical protein	274.333	78	97	76	98	47
LGG_RS02090	LGG_00433	menC	O-succinylbenzoate synthase	64.6667	50.6667	35	63	170	301
LGG_RS02095	LGG_00434	nagZ	beta-N-acetylglucosaminidase	4405.67	927.667	564	1662	286	392
LGG_RS02100	not predicted	NO NAME	transposase	37	53.3333	28	51	47	109
LGG_RS02105	LGG_00436	tnpR	resolvase	400	658.667	339	626	351	614
LGG_RS02110	LGG_00437	NO NAME	hypothetical protein	289.667	437	235	453	269	366
LGG_RS02115	pseudo-gene	NO NAME	alcohol dehydrogenase	245.333	419.667	156	415	222	302
LGG_RS02120	not predicted	NO NAME	hypothetical protein	158	206.333	117	180	127	252
LGG_RS02125	LGG_00441	srtC1	sortase	2224.67	1257	1413	974	6883	4564
LGG_RS02130	LGG_00442	spaA	pilus protein	24036.3	8360.33	14094	5803	75023	41696
LGG_RS02135	LGG_00443	spaB	pilus protein	12330.7	4358.33	7287	3112	39850	19670
LGG_RS02140	LGG_00444	spaC	pilus protein	64838.7	24362.3	37940	17314	225055	113022
LGG_RS02145	LGG_00445	is15	transposase	0	0	0	0	0	0
LGG_RS02150	LGG_00446	NO NAME	hypothetical protein	71	61	47	53	181	454
LGG_RS02155	pseudo-gene	NO NAME	hypothetical protein	227	235.667	186	229	607	1121
LGG_RS02160	LGG_00449	NO NAME	helicase UvrD	392.333	401.333	274	386	1522	2160
LGG_RS02165	LGG_00450	ybjD	hypothetical protein	265.667	206	199	197	263	286
LGG_RS02170	LGG_00451	is16	transposase	0	0.666667	0	1	0	0
LGG_RS02175	LGG_00452	is17	transposase	24	16.3333	20	14	21	36
LGG_RS02180	LGG_00453	is18	transposase	131	70.6667	99	62	114	121
LGG_RS02185	LGG_00454	is19	integrase	87.6667	85	49	84	104	242
LGG_RS02190	LGG_00455	NO NAME	hypothetical protein	1224.33	856	758	827	747	1482
LGG_RS02195	LGG_00456	pacL	magnesium-transporting ATPase	4873.33	2893	2394	3217	1731	2924
LGG_RS02200	LGG_00458	is21	transposase	15.3333	18	25	12	26	28
LGG_RS02205	LGG_00459	napA	sodium:proton antiporter	192.333	223.667	182	237	352	349
LGG_RS02210	LGG_00460	is22	transposase	5	5	1	4	8	10
LGG_RS02215	LGG_00462	is24	transposase	61.6667	75.3333	52	70	89	165
LGG_RS02220	LGG_00463	eriC	ATP synthase F0 subunit A	123.333	122.667	80	106	155	234
LGG_RS02225	not predicted	NO NAME	transposase	42.3333	61	32	62	71	101
LGG_RS02230	LGG_00465	NO NAME	transporter	59.6667	76.6667	33	68	96	103
LGG_RS02235	LGG_00466	is26	transposase	0	0	0	0	0	0
LGG_RS02240	LGG_00467	NO NAME	peptidase M20	70	133	40	116	47	87
LGG_RS02245	pseudo-gene	NO NAME	LysR family transcriptional regulator	41.6667	99	16	82	21	67
LGG_RS02250	LGG_00470	ebgA	beta-galactosidase	571.333	853.667	315	740	388	459
LGG_RS02255	LGG_00471	ygjI	amino acid permease	201	283.333	138	247	165	171
LGG_RS02260	LGG_00472	lysP	gamma-aminobutyrate permease	118.333	154.667	84	129	94	135
LGG_RS02265	LGG_00473	araC	AraC family transcriptional regulator	925.333	268.667	330	266	85	97
LGG_RS02270	LGG_00474	NO NAME	transcriptional regulator	772	312.333	181	347	132	219
LGG_RS02275	LGG_00475	NO NAME	transporter	53	52	30	61	25	29
LGG_RS02280	LGG_00476	abgB	peptidase M20	133	112.333	101	118	92	135
LGG_RS02285	LGG_00477	NO NAME	membrane protein	227	239.667	204	275	132	187
LGG_RS02290	LGG_00478	yecC	phosphate ABC transporter ATP-binding protein	122	135.667	108	142	70	76
LGG_RS02295	LGG_00479	NO NAME	amino acid ABC transporter substrate-binding protein	148.333	165.667	142	204	65	69
LGG_RS02300	LGG_00480	NO NAME	amino acid ABC transporter permease	69.6667	80.3333	50	79	134	217
LGG_RS02305	LGG_00481	NO NAME	amino acid ABC transporter permease	67	95.6667	44	74	211	272
LGG_RS02310	LGG_00482	NO NAME	hypothetical protein	23.3333	20	21	34	39	53
LGG_RS02315	LGG_00484	NO NAME	DNA-directed RNA polymerase subunit sigma-24	3.33333	4.66667	4	3	5	3
LGG_RS02320	LGG_00486	NO NAME	lyzozyme M1 (1%2C4-beta-N-acetylmuramidase)	24	29.6667	24	27	28	21
LGG_RS02325	LGG_00487	NO NAME	hypothetical protein	418.333	419	308	517	559	784
LGG_RS02330	LGG_00488	NO NAME	TetR family transcriptional regulator	118	101	101	98	115	123
LGG_RS02335	LGG_00489	NO NAME	ABC transporter permease	435.667	363.333	341	377	508	529
LGG_RS02340	LGG_00490	lolD	peptide ABC transporter ATP-binding protein	316	286	223	267	400	567
LGG_RS02345	LGG_00491	npr	NAD(FAD)-dependent dehydrogenase	35079.7	23916	18303	23000	63404	67499
LGG_RS02350	LGG_00492	NO NAME	haloacid dehalogenase	697	491.333	462	508	1482	2650
LGG_RS02355	LGG_00493	NO NAME	toxin	55	66.6667	42	73	111	129
LGG_RS02360	LGG_00494	NO NAME	adenylyl transferase	244	263.667	165	271	428	526
LGG_RS02365	LGG_00495	NO NAME	hypothetical protein	8	19.3333	6	21	38	96
LGG_RS02370	LGG_00496	NO NAME	hypothetical protein	6.66667	10.3333	2	12	45	64
LGG_RS02375	LGG_00497	NO NAME	hypothetical protein	11.6667	25	12	21	82	191
LGG_RS02380	LGG_00499	is27	transposase	1.66667	0.666667	4	1	1	4
LGG_RS02385	not predicted	NO NAME	hypothetical protein	19.3333	21	12	13	99	99
LGG_RS02390	LGG_00500	metQ	metal ABC transporter substrate-binding protein	14.6667	11	9	15	83	106
LGG_RS02395	LGG_00501	NO NAME	choloylglycine hydrolase	4682.33	3888.33	3491	4148	3605	6433
LGG_RS02400	LGG_00502	NO NAME	hypothetical protein	300	323	208	306	374	377
LGG_RS02405	LGG_00503	NO NAME	isomerase	3998.67	4307.67	2163	4280	2778	4292
LGG_RS02410	LGG_00505	NO NAME	transcriptional regulator	6585.67	6508.67	3700	6615	3066	5736
LGG_RS02415	LGG_00506	NO NAME	dihydroxyacetone kinase	8335	7562	4254	7875	3615	6255
LGG_RS02420	LGG_00508	dhaL	dihydroxyacetone kinase	11467.7	10882.3	6285	11196	4945	8470
LGG_RS02425	LGG_00509	dhaK	dihydroxyacetone kinase subunit DhaK	15111.7	14393	8275	15295	6093	10328
LGG_RS02430	LGG_00510	NO NAME	dihydroneopterin aldolase	3270	1722.67	1563	2274	464	996
LGG_RS02435	LGG_00511	NO NAME	ABC transporter ATP-binding protein	121.333	122.333	89	115	93	133
LGG_RS02440	LGG_00512	NO NAME	ABC transporter	56.3333	56	39	47	67	113
LGG_RS02445	LGG_00513	is28	transposase	4.33333	6.33333	7	4	9	30
LGG_RS02450	LGG_00514	NO NAME	hypothetical protein	56.3333	75.6667	28	55	118	237
LGG_RS02455	LGG_00516	NO NAME	hypothetical protein	86.3333	86.3333	72	80	162	225
LGG_RS02460	LGG_00517	is29	transposase	7.66667	4	4	7	5	10
LGG_RS02465	not predicted	NO NAME	hypothetical protein	95.3333	101.333	71	114	92	120
LGG_RS02470	LGG_00518	NO NAME	DNA polymerase III subunit alpha	911.667	941.333	677	973	912	1248
LGG_RS02475	LGG_00519	NO NAME	DNA-damage-inducible protein J	69	71.6667	28	83	93	140
LGG_RS02480	LGG_00520	yceK	ArsR family transcriptional regulator	1129	878.667	646	982	556	962
LGG_RS02485	LGG_00521	yceJ	MFS transporter permease	32	33.6667	24	26	86	99
LGG_RS02490	LGG_00522	tag	3-methyladenine DNA glycosylase	350.667	358.667	227	364	247	457
LGG_RS02495	LGG_00523	NO NAME	hypothetical protein	234.333	274.333	145	238	161	275
LGG_RS02500	LGG_00524	fba	fructose-bisphosphate aldolase	28039.3	9967.67	20513	9382	46132	62873
LGG_RS02505	LGG_00525	cidC	pyruvate oxidase	19704	29380	11016	32342	3255	12967
LGG_RS02510	LGG_00526	NO NAME	hypothetical protein	505	290.667	368	273	244	167
LGG_RS02515	pseudo-gene	NO NAME	beta-lactamase	1090.67	761.333	876	751	831	831
LGG_RS02520	LGG_00529	NO NAME	hypothetical protein	99.3333	67.3333	45	62	61	67
LGG_RS02525	LGG_00530	ykfB	L-alanine-DL-glutamate epimerase	227.667	254.333	166	244	164	259
LGG_RS02530	LGG_00532	NO NAME	SAM-dependent methyltransferase	504.667	376.333	346	373	522	534
LGG_RS02535	LGG_00533	radC	hypothetical protein	179	158.333	118	138	203	234
LGG_RS02540	LGG_00534	trpD	glutamine amidotransferase	569.667	408.667	434	407	624	623
LGG_RS02545	LGG_00535	NO NAME	hypothetical protein	99.3333	102.333	65	113	261	307
LGG_RS02550	LGG_00536	glnA	glutamine synthetase	2261	2254.67	2390	2210	5288	5762
LGG_RS02555	LGG_00538	NO NAME	hydrolase	5941.67	3996	5145	3514	7273	6287
LGG_RS02560	LGG_00539	NO NAME	amino acid transporter	5272	2943	3983	2536	6029	5192
LGG_RS02565	LGG_00540	merR	MerR family transcriptional regulator	491.667	333	358	313	545	397
LGG_RS02570	LGG_00541	ycgG	2%2C5-diketo-D-gluconic acid reductase	2053.67	1663.33	1243	1411	1784	2523
LGG_RS02575	LGG_00542	gor	NADPH:quinone reductase	818.667	976.333	440	948	821	1305
LGG_RS02580	LGG_00543	ydeP	HxlR family transcriptional regulator	2180	2007.33	1311	1966	2220	5383
LGG_RS02585	LGG_00544	NO NAME	membrane protein	92	124	56	132	141	296
LGG_RS02590	LGG_00545	NO NAME	ABC transporter permease	151.333	176	69	180	122	233
LGG_RS02595	LGG_00546	natA	ABC transporter ATP-binding protein	181	186.333	117	195	150	247
LGG_RS02600	LGG_00547	NO NAME	ABC transporter ATP-binding protein	475.333	382	318	456	567	529
LGG_RS02605	LGG_00548	resD	two-component system response regulator	338	231.667	203	241	188	237
LGG_RS02610	LGG_00549	resE	signal transduction histidine kinase	2187.67	1459.67	1152	1528	914	1621
LGG_RS02615	LGG_00550	mppX	ABC transporter ATP-binding protein	392.333	310.667	256	312	293	162
LGG_RS02620	LGG_00551	NO NAME	ABC transporter permease	291	209.333	157	211	231	134
LGG_RS02625	LGG_00552	NO NAME	hypothetical protein	90	70	49	61	110	56
LGG_RS02630	LGG_00554	pepN	aminopeptidase N	36436.3	25717.7	22946	27910	22384	19247
LGG_RS02635	LGG_00555	ycaM	transporter	839	309.667	717	346	1522	804
LGG_RS02640	LGG_00557	xylP	sodium:solute symporter	3785.33	3694	2041	3499	3144	4392
LGG_RS02645	LGG_00558	NO NAME	membrane protein	2504	2319.67	1263	2168	1403	2380
LGG_RS02650	LGG_00559	NO NAME	LysR family transcriptional regulator	811.333	267.667	301	398	112	121
LGG_RS02655	LGG_00561	NO NAME	isomerase	82	53.6667	27	68	58	109
LGG_RS02660	LGG_00562	kduD	2-deoxy-D-gluconate 3-dehydrogenase	68.6667	47.6667	33	60	36	53
LGG_RS02665	LGG_00563	NO NAME	hypothetical protein	8	3	1	5	3	8
LGG_RS02670	LGG_00564	aroE	shikimate 5-dehydrogenase	39.6667	24.6667	25	44	33	36
LGG_RS02675	LGG_00565	yfkL	MFS transporter	58.6667	62	43	73	70	125
LGG_RS02680	LGG_00566	aroE	shikimate 5-dehydrogenase	44.6667	47.3333	39	55	74	112
LGG_RS02685	LGG_00567	metA	homoserine O-succinyltransferase	1926.33	1675	1157	1932	2950	4121
LGG_RS02690	LGG_00568	cysK	cysteine synthase	1598.33	1028.33	967	1403	2732	3511
LGG_RS02695	LGG_02945	tRNA-Arg	tRNA-Arg	18.3333	18.6667	10	12	22	31
LGG_RS02700	LGG_00569	NO NAME	hypothetical protein	277.667	340	252	361	291	746
LGG_RS02705	LGG_00570	NO NAME	hypothetical protein	139.667	133	125	151	69	109
LGG_RS02710	LGG_00571	metC	cystathionine beta-lyase	810	844.667	740	1045	562	632
LGG_RS02715	LGG_00572	fliY	amino acid ABC transporter substrate-binding protein	778.667	842.667	663	909	353	655
LGG_RS02720	LGG_00573	yecS	cysteine ABC transporter permease	514	576.333	385	600	236	535
LGG_RS02725	LGG_00574	NO NAME	hypothetical protein	3848.67	3585.67	2400	3475	4702	3108
LGG_RS02730	LGG_00575	brnQ	branched-chain amino acid transporter II carrier protein	1113	778.667	1359	853	375	292
LGG_RS02735	LGG_00576	NO NAME	hypothetical protein	36	29	10	29	41	103
LGG_RS02740	LGG_00577	NO NAME	cell surface protein	39.6667	43	28	47	82	74
LGG_RS02745	LGG_00578	NO NAME	peptidase	19.3333	14.6667	7	14	20	29
LGG_RS02750	LGG_00579	NO NAME	hypothetical protein	326.667	263.667	187	236	298	268
LGG_RS02755	not predicted	NO NAME	transposase	0	0	0	0	0	0
LGG_RS02760	LGG_00582	is31	transposase	91.6667	189.667	59	121	79	123
LGG_RS02765	LGG_00583	NO NAME	hypothetical protein	1115	1190.33	529	786	476	527
LGG_RS02770	LGG_00584	NO NAME	cell surface protein	629.333	593	274	385	259	241
LGG_RS02775	LGG_00585	NO NAME	cell surface protein	969	968	448	665	500	396
LGG_RS02780	LGG_00587	NO NAME	hypothetical protein	1776.33	1837.33	1016	1287	1194	845
LGG_RS02785	LGG_00588	yicL	peptide ABC transporter ATP-binding protein	381.333	342	224	333	366	506
LGG_RS02790	LGG_00589	NO NAME	hypothetical protein	0	0	0	0	0	0
LGG_RS02795	LGG_00590	NO NAME	ABC transporter permease	893.333	587.667	794	654	1196	998
LGG_RS02800	LGG_00591	CcmA5	ABC transporter	403.333	345.667	318	410	530	557
LGG_RS02805	LGG_00592	NO NAME	hypothetical protein	97.6667	85.3333	53	75	135	264
LGG_RS02810	LGG_00593	is32	transposase	0	0	0	0	0	0
LGG_RS02815	LGG_00595	pdxK	pyridoxal kinase	690.333	899.667	484	957	584	1275
LGG_RS02820	LGG_00596	metF	5%2C10-methylenetetrahydrofolate reductase	1005	811.667	769	751	504	867
LGG_RS02825	LGG_00597	metE	5-methyltetrahydropteroyltriglutamate--homocysteine methyltransferase	1640	1819	1228	1678	836	1938
LGG_RS02830	LGG_00598	lmrC	ABC transporter ATP-binding protein	1483.67	1022.33	965	1333	999	1702
LGG_RS02835	LGG_00599	lmrD	multidrug ABC transporter permease	2294.33	1484.33	1617	1996	1339	2028
LGG_RS02840	LGG_00600	oxlT	MFS transporter	23527.7	8273.33	1543	5093	456	920
LGG_RS02845	LGG_00601	treR	transcriptional regulator	21292	399.333	10206	387	7261	8101
LGG_RS02850	LGG_00602	treC	alpha-amylase	50020.3	917	21824	759	12812	13043
LGG_RS02855	LGG_00603	treB	PTS beta-glucoside transporter subunit IIABC	54754	1122.33	25433	1032	14227	19824
LGG_RS02860	LGG_00604	sstT	serine/threonine transporter SstT	476.333	338	340	358	410	622
LGG_RS02865	LGG_00605	bcaP	amino acid permease	506.667	548.333	497	661	550	987
LGG_RS02870	LGG_00606	ldh	L-lactate dehydrogenase	2544	1567.33	957	2251	711	1467
LGG_RS02875	LGG_00607	gdhA	glutamate dehydrogenase	246.333	225.333	206	242	323	340
LGG_RS02880	LGG_00608	cspA	cold-shock protein	26499.3	12850.3	17193	13058	23942	31959
LGG_RS02885	LGG_00610	NO NAME	hypothetical protein	350.333	289	192	273	453	338
LGG_RS02890	LGG_00611	NO NAME	dihydroneopterin aldolase	900	553	336	751	511	1045
LGG_RS02895	LGG_00612	lsa	ABC-F type ribosomal protection protein	464.667	318.667	330	330	650	445
LGG_RS02900	LGG_00614	ylbE	nucleoside-diphosphate sugar epimerase	7809.33	5953.33	5075	5928	4445	4215
LGG_RS02905	LGG_00615	yeaE	aldehyde oxidoreductase	7976.33	6725.33	5188	6218	5151	5382
LGG_RS02910	LGG_00616	proY	alanine glycine permease	2384	2065.33	1394	1566	22307	13263
LGG_RS02915	LGG_00617	NO NAME	hypothetical protein	23186.3	17286.7	16486	15063	46401	31022
LGG_RS02920	LGG_00618	NO NAME	sodium:proton antiporter	2512.67	2773	1302	3039	1789	4403
LGG_RS02925	LGG_00619	NO NAME	hypothetical protein	265	359.333	167	364	194	340
LGG_RS02930	LGG_00620	NO NAME	transcriptional regulator	227.667	320.667	144	319	152	289
LGG_RS02935	LGG_00621	cylB	multidrug ABC transporter permease	49	50	37	41	31	37
LGG_RS02940	LGG_00622	cylA	ABC transporter ATP-binding protein	50	41.6667	41	55	39	49
LGG_RS02945	LGG_00623	NO NAME	alpha/beta hydrolase	1248.33	1244.67	600	1278	2008	1524
LGG_RS02950	LGG_00624	cah	carbonic anhydrase	1052.67	1178.67	543	1168	1640	1518
LGG_RS02955	LGG_00625	ybjQ	hypothetical protein	1615.33	1080.67	792	1156	2005	2404
LGG_RS02960	LGG_00627	NO NAME	NUDIX hydrolase	109	116.333	74	120	145	182
LGG_RS02965	LGG_00628	walR	two-component system response regulator	187	136	67	154	92	130
LGG_RS02970	LGG_00629	walK	two-component system sensor histidine kinase	217	186	98	146	125	209
LGG_RS02975	LGG_00630	ycbN	bacitracin ABC transporter ATP-binding protein	576.667	890.333	283	945	343	383
LGG_RS02980	LGG_00631	NO NAME	bacitracin ABC transporter permease	297	532.333	129	550	233	385
LGG_RS02985	LGG_00632	gor	NADPH:quinone reductase	294.333	504.333	124	507	392	961
LGG_RS02990	LGG_00633	amtB	ammonia permease	78	163.333	45	137	188	466
LGG_RS02995	LGG_00634	NO NAME	peroxidase	1315.67	1051.67	821	1182	1143	1590
LGG_RS03000	LGG_00635	yhiD	methyltransferase	539.333	505.333	438	540	470	720
LGG_RS03005	LGG_00636	endA	XRE family transcriptional regulator	680	649	540	734	577	790
LGG_RS03010	LGG_00638	ybiT	heme ABC transporter ATP-binding protein	2056.33	1750.67	1582	1949	1870	2591
LGG_RS03015	pseudo-gene	NO NAME	DNA mismatch repair protein MutS	2260	2039	1731	2203	1549	1368
LGG_RS03020	LGG_00641	ysiD	uracil-DNA glycosylase	851.667	681	587	630	549	499
LGG_RS03025	LGG_00642	glpF	glycerol transporter	413	249.667	227	427	175	162
LGG_RS03030	LGG_00643	glpD	alpha-glycerophosphate oxidase	1435	520	260	1079	179	251
LGG_RS03035	LGG_00644	glpK	glycerol kinase	1067.33	334	131	623	80	160
LGG_RS03040	LGG_00645	NO NAME	glycosyl transferase family 2	31	39.3333	8	39	25	54
LGG_RS03045	LGG_00646	NO NAME	hypothetical protein	107	105.667	38	152	33	102
LGG_RS03050	LGG_00647	NO NAME	hypothetical protein	19.6667	14	10	19	6	26
LGG_RS03055	LGG_00648	lacT	transcription antiterminator lact	313.333	82.6667	87	134	57	49
LGG_RS03060	LGG_00649	lacE	PTS lactose transporter subunit IIB	462.333	159.667	122	230	107	96
LGG_RS03065	pseudo-gene	NO NAME	6-phospho-beta-galactosidase	354.667	196.667	129	238	225	269
LGG_RS03070	LGG_00652	lacF	PTS lactose transporter subunit IIA	73.3333	60.3333	44	73	75	137
LGG_RS03075	LGG_00653	galK	galactokinase	2525.67	681.333	766	968	617	487
LGG_RS03080	LGG_00654	galE	UDP-glucose 4-epimerase	14240	8772.67	8541	9293	7887	7290
LGG_RS03085	LGG_00655	galT	peptidase S24	19419.3	11701.3	10863	12682	10343	7888
LGG_RS03090	LGG_00656	galR	transcriptional regulator	11928.3	7207.67	6665	7942	6963	5356
LGG_RS03095	LGG_00657	galM	aldose 1-epimerase	13941.7	8780	8492	10228	9343	5570
LGG_RS03100	LGG_00658	NO NAME	hypothetical protein	76.3333	44.3333	41	45	31	36
LGG_RS03105	LGG_00659	pts	PTS glucitol transporter subunit IIA	195	112.667	71	101	98	219
LGG_RS03110	LGG_00660	NO NAME	hypothetical protein	30	30	18	33	34	59
LGG_RS03115	LGG_00661	NO NAME	hypothetical protein	771.667	586.667	572	582	581	535
LGG_RS03120	LGG_00662	NO NAME	serine hydrolase	2282.67	1104	1376	1297	1240	1239
LGG_RS03125	LGG_00663	NO NAME	hypothetical protein	1550.67	754.667	833	836	953	711
LGG_RS03130	LGG_00664	lacC	tagatose-6-phosphate kinase	2322.67	1146	1325	1318	1408	1074
LGG_RS03135	LGG_00665	lacD	tagatose-bisphosphate aldolase	4504.67	2206.67	2679	2424	2255	1764
LGG_RS03140	LGG_00666	lacB	galactose-6-phosphate isomerase	2796.33	1478.67	1708	1690	1352	1026
LGG_RS03145	LGG_00667	lacA	galactose-6-phosphate isomerase	2146.67	1181	1199	1218	1095	926
LGG_RS03150	LGG_00668	lacR	DeoR family transcriptional regulator	3207.67	2078.67	1912	2252	1917	1535
LGG_RS03155	LGG_00669	NO NAME	phosphatase	2384.67	1448	1099	1521	995	1509
LGG_RS03160	LGG_00670	sbcD	exonuclease SbcD subunit D	846.333	707.667	604	671	1288	1297
LGG_RS03165	LGG_00671	sbcC	DNA repair ATPase	4889	3137.33	3465	2954	5322	3028
LGG_RS03170	LGG_00675	hsp1	molecular chaperone	4920.33	5401.33	3571	3172	3911	18202
LGG_RS03175	LGG_00676	mutY	A/G-specific adenine glycosylase	948	1129	676	974	880	1618
LGG_RS03180	LGG_00677	NO NAME	esterase	1663.33	1644	1122	1604	1125	1694
LGG_RS03185	LGG_00678	ywrO	NAD(P)H dehydrogenase	1003.67	862	662	884	658	1010
LGG_RS03190	LGG_00679	NO NAME	hypothetical protein	416.333	420.667	319	424	273	338
LGG_RS03195	LGG_00680	NO NAME	hypothetical protein	1270	1112.67	941	1114	836	1394
LGG_RS03200	LGG_00681	thiD	phosphomethylpyrimidine kinase	10678	9655.33	8199	10641	6866	7106
LGG_RS03205	LGG_00682	NO NAME	hypothetical protein	13976	12397.3	11015	13671	7664	7031
LGG_RS03210	LGG_00683	NO NAME	hypothetical protein	7343.67	6293	5836	7080	3460	3744
LGG_RS03215	LGG_00684	ywnB	NADH-flavin reductase	829.333	709	448	803	989	2547
LGG_RS03220	LGG_00685	bglX	beta-glucosidase	4042	4511.67	3063	5623	2531	4053
LGG_RS03225	LGG_00686	NO NAME	hypothetical protein	250	242.333	187	276	118	236
LGG_RS03230	LGG_00687	ABC-SBP	ABC transporter substrate-binding protein	68	57.3333	68	62	36	37
LGG_RS03235	LGG_00689	ABC-SBP	ABC transporter substrate-binding protein	1021.67	519	1288	651	730	275
LGG_RS03240	LGG_00690	ABC-MSP	ABC transporter permease	774.333	385.667	947	457	589	213
LGG_RS03245	LGG_00691	thiQ	ABC transporter ATP-binding protein	936.333	416	1107	474	658	288
LGG_RS03250	LGG_00692	yhdH	NADPH:quinone reductase	1174.67	822.667	768	893	1071	1443
LGG_RS03255	LGG_00693	pacL	metal ABC transporter ATPase	97.6667	120.333	58	105	268	441
LGG_RS03260	LGG_00695	gtrB	glycosyltransferase	87	89.6667	53	82	65	103
LGG_RS03265	LGG_00696	ykcB	4-amino-4-deoxy-L-arabinose transferase	156	160.333	139	187	108	118
LGG_RS03270	LGG_00697	NO NAME	membrane protein	28.3333	25.6667	20	20	45	57
LGG_RS03275	LGG_00700	phoP1	two-component system response regulator	593.667	675	410	702	370	402
LGG_RS03280	LGG_00701	phoR1	two-component system sensor histidine kinase	1034.67	959	748	1011	632	740
LGG_RS03285	LGG_00702	NO NAME	hypothetical protein	522	757.667	170	779	422	1783
LGG_RS03290	LGG_00703	NO NAME	polyketide synthase	1018.67	397	295	403	347	345
LGG_RS03295	LGG_00704	NO NAME	short-chain dehydrogenase	58	42.3333	26	60	42	63
LGG_RS03300	LGG_00705	adc	acetoacetate decarboxylase	59.3333	61.6667	28	48	41	58
LGG_RS03305	LGG_00706	ydgI	NAD(P)H-dependent quinone reductase	3101.67	1751.33	1383	2405	399	688
LGG_RS03310	LGG_00707	lctO	L-lactate oxidase	4268.67	2621.33	1721	3577	623	1352
LGG_RS03315	LGG_03001	tRNA-Ala	tRNA-Ala	40	18	32	17	34	32
LGG_RS03320	LGG_03000	tRNA-Ala	tRNA-Ala	49	16.3333	29	18	67	22
LGG_RS03325	LGG_00708	NO NAME	hypothetical protein	1016.33	293.333	1058	370	2194	501
LGG_RS03330	LGG_00709	ydaF	PadR family transcriptional regulator	374.333	148.667	403	154	804	258
LGG_RS03335	LGG_00710	ygbF	membrane protein	1125	932.333	998	915	1568	1493
LGG_RS03340	LGG_00711	NO NAME	hypothetical protein	643.333	608.333	561	591	1136	1056
LGG_RS03345	LGG_00712	gor	NADPH:quinone reductase	1911.33	1766.33	1530	1812	3183	3189
LGG_RS03350	LGG_00713	NO NAME	hypothetical protein	438.667	392	322	324	761	805
LGG_RS03355	LGG_00714	NO NAME	hypothetical protein	990.333	665.333	804	848	618	1070
LGG_RS03360	LGG_00715	yubA	membrane protein	1956.67	1599	1503	2002	1326	2235
LGG_RS03365	LGG_00716	NO NAME	hypothetical protein	140.667	147.333	109	175	276	473
LGG_RS03370	LGG_00717	lexA	LexA family transcriptional regulator	1483.33	1214.33	1000	1262	1438	1700
LGG_RS03375	LGG_00718	NO NAME	hypothetical protein	1667.33	1368.67	1412	1482	1277	692
LGG_RS03380	LGG_00719	mleP	malate transporter	2474	2162.33	1929	2437	2139	1620
LGG_RS03385	LGG_00720	ywrF	hypothetical protein	1753.33	1837.67	1332	1912	1604	1392
LGG_RS03390	LGG_00721	NO NAME	hypothetical protein	4338.67	5283.67	3279	5100	3934	3222
LGG_RS03395	LGG_00722	fthC	5-formyltetrahydrofolate cyclo-ligase	4235.33	4223	2857	4266	3463	4585
LGG_RS03400	LGG_00723	yeaO	hypothetical protein	2526	2453	1556	2249	2054	2193
LGG_RS03405	LGG_00724	NO NAME	Mg2+ and Co2+ transporter protein	1014.67	1326.67	684	1278	1087	1226
LGG_RS03410	LGG_00725	mleR	LysR family transcriptional regulator	921.667	1358	670	1427	761	1120
LGG_RS03415	LGG_00726	sfcA	malate dehydrogenase	289.333	288	183	282	379	767
LGG_RS03420	LGG_00727	mleP	malate permease	177.333	238.333	83	220	275	879
LGG_RS03425	LGG_00728	tpx	thiol peroxidase	2654.33	3574.33	1808	3575	2825	5871
LGG_RS03430	LGG_00729	NO NAME	flavodoxin	68.6667	79.6667	29	82	109	184
LGG_RS03435	LGG_00730	NO NAME	transcriptional regulator	159.333	198.667	141	225	306	451
LGG_RS03440	LGG_00731	NO NAME	multidrug ABC transporter ATP-binding protein	355.667	336	237	362	771	1525
LGG_RS03445	LGG_00732	pepF	oligoendopeptidase F	2803.67	2160.67	1992	2758	3116	4527
LGG_RS03450	LGG_00733	ndk	nucleoside diphosphate kinase	3449.33	3032	2100	2939	4047	5806
LGG_RS03455	LGG_00734	NO NAME	hypothetical protein	2833	2573.67	2664	2990	1958	1747
LGG_RS03460	LGG_00735	ctpE	magnesium-transporting ATPase	10911.7	10274	9654	12529	4349	5033
LGG_RS03465	LGG_00736	pepR	prolyl aminopeptidase	3541	2784.67	2703	3158	2593	4055
LGG_RS03470	LGG_00737	NO NAME	hypothetical protein	3493	3508	2272	3837	1708	3994
LGG_RS03475	LGG_00738	wecD	acetyltransferase	2535.67	2315.67	2021	2504	1603	1530
LGG_RS03480	LGG_00739	napA	sodium:proton antiporter	6290.33	5441.33	5156	5874	4495	4657
LGG_RS03485	LGG_00740	gph	haloacid dehalogenase	5056.33	4161.33	3611	4418	3747	5055
LGG_RS03490	LGG_00741	NO NAME	MarR family transcriptional regulator	2075	1582.67	1331	1483	2252	2719
LGG_RS03495	LGG_00742	ybcH	alpha/beta hydrolase	3605	3496.67	2471	3575	2061	1825
LGG_RS03500	LGG_00743	nrdI	flavoprotein	3338.67	3030	2093	2955	2014	1762
LGG_RS03505	LGG_00744	dkgA	2%2C5-diketo-D-gluconic acid reductase	13735.7	16826.7	8228	16373	11900	20611
LGG_RS03510	LGG_00745	NO NAME	hypothetical protein	556.333	668.333	400	703	929	868
LGG_RS03515	LGG_00746	NO NAME	alpha/beta hydrolase	1459	1337.67	1068	1360	1856	2033
LGG_RS03520	LGG_00747	yviA	membrane protein	1085.33	963.667	820	1084	1405	1428
LGG_RS03525	LGG_00748	NO NAME	hypothetical protein	618	602.667	488	671	820	871
LGG_RS03530	LGG_00749	metE	hypothetical protein	1457	1019.33	1374	1063	1267	1691
LGG_RS03535	LGG_00750	luxS	S-ribosylhomocysteinase	15311	13890.7	9896	13726	13205	28609
LGG_RS03540	LGG_00751	yjbF	membrane protein	1837.67	1529.67	1001	1026	4532	3472
LGG_RS03545	LGG_00752	ruvA	Holliday junction DNA helicase RuvA	2132.67	1800	1278	1276	4750	4148
LGG_RS03550	LGG_00753	ruvB	Holliday junction DNA helicase RuvB	4954.33	4038.33	3248	3459	8659	7836
LGG_RS03555	LGG_00754	queA	S-adenosylmethionine:tRNA ribosyltransferase-isomerase	7153.67	5292.33	5220	4751	10692	9737
LGG_RS03560	LGG_00755	tgt	queuine tRNA-ribosyltransferase	1892.67	1626.33	1740	1717	2755	2379
LGG_RS03565	LGG_00756	yajC	preprotein translocase subunit YajC	2856.33	2222	2346	2478	2961	3381
LGG_RS03570	LGG_00757	adhE	bifunctional acetaldehyde-CoA/alcohol dehydrogenase	7381	4222.33	4568	4686	5495	5105
LGG_RS03575	LGG_00759	sirR	Cro/Cl family transcriptional regulator	3129.67	2907	2418	3097	2940	3930
LGG_RS03580	LGG_00760	zwf	glucose-6-phosphate 1-dehydrogenase	8539.67	7354.67	6953	8060	8562	8718
LGG_RS03585	LGG_00761	dinB	DNA polymerase IV	1415.33	1614	1285	1665	2971	3034
LGG_RS03590	LGG_00762	ytoI	thioesterase	4973.33	4360.67	3633	4345	5720	6295
LGG_RS03595	LGG_00763	ytqI	phosphoesterase	4521.33	3109	3270	3393	4234	3380
LGG_RS03600	LGG_00764	rheB	DEAD/DEAH box helicase	10092	6695.33	7430	6883	9309	6411
LGG_RS03605	LGG_00765	NO NAME	hypothetical protein	5455.33	3430.67	3929	3228	5305	3943
LGG_RS03610	LGG_00766	NO NAME	hypothetical protein	1131.67	838	802	831	1343	1590
LGG_RS03615	LGG_00767	alaS	alanyl-tRNA synthetase	19601.3	13122.7	14945	13898	21355	20508
LGG_RS03620	LGG_00768	NO NAME	hypothetical protein	935	532	495	575	314	371
LGG_RS03625	LGG_00769	alaRS	hypothetical protein	2375	2107.67	1569	2260	1973	2462
LGG_RS03630	LGG_00770	ruvX	Holliday junction DNA helicase	3453	3321.33	2283	3502	3361	4446
LGG_RS03635	LGG_00771	ybeC	hypothetical protein	2447.33	2277	1549	2360	2429	3562
LGG_RS03640	LGG_00772	NO NAME	cell division protein FtsZ	694.333	829.333	527	763	688	874
LGG_RS03645	LGG_00773	NO NAME	colicin V biosynthesis protein	1587	1716.67	1335	1615	1293	1752
LGG_RS03650	LGG_00774	mutS	DNA mismatch repair protein MutS	8943	6561.33	7567	6668	7717	7427
LGG_RS03655	LGG_00775	trxA	thioredoxin	3892	2722	2962	2872	5216	7020
LGG_RS03660	LGG_00776	dltX	cytochrome C553	2841.67	781	3592	931	1241	299
LGG_RS03665	LGG_00777	dltA	D-alanine--poly(phosphoribitol) ligase subunit 1	17144.3	5888.67	21164	6646	8783	4726
LGG_RS03670	LGG_00778	dltB	D-alanyl-lipoteichoic acid biosynthesis protein DltB	9295	3681	11236	4069	4945	2970
LGG_RS03675	LGG_00779	dltC	D-alanine--poly(phosphoribitol) ligase subunit 2	3030	1217	3451	1383	1675	800
LGG_RS03680	LGG_00780	dltD	cytochrome C552	8459.67	3291.33	9409	3480	4823	2834
LGG_RS03685	LGG_00781	yslB	yslB protein	927	946	623	886	997	1946
LGG_RS03690	LGG_00782	murI	glutamate racemase	3410.67	3123	2361	2988	4644	4951
LGG_RS03695	LGG_00783	xerD	phosphodiesterase	1107.67	916.667	780	945	1641	1537
LGG_RS03700	LGG_00784	glpF	glycerol uptake permease	536.667	453.333	378	425	902	1012
LGG_RS03705	LGG_00785	ykuL	hypothetical protein	1626.67	1685.67	1045	1786	1616	2123
LGG_RS03710	LGG_00786	NO NAME	membrane protein	1399.67	1440.67	967	1548	1624	1938
LGG_RS03715	LGG_00787	NO NAME	mechanosensitive ion channel protein MscS	1213.33	1299.33	887	1535	1200	1432
LGG_RS03720	LGG_00789	NO NAME	chemotaxis protein	4305	3944	2946	3655	2703	2602
LGG_RS03725	LGG_00790	NO NAME	hypothetical protein	4225.67	3644.67	2745	3427	2776	3734
LGG_RS03730	LGG_00791	yrxA	transcriptional regulator	2278.33	2106	1782	2023	1418	1223
LGG_RS03735	LGG_00792	pepQ	dipeptidase	8421.33	8096.67	6931	8244	6568	5624
LGG_RS03740	LGG_00793	ccpA	catabolite control protein A	5447	2370.33	2576	3018	2628	2349
LGG_RS03745	LGG_00794	pbp1B	carboxypeptidase	5888	4650.33	4745	5170	4116	3291
LGG_RS03750	LGG_00796	yfnB	haloacid dehalogenase	3046.67	2898.67	1970	3006	2082	1577
LGG_RS03755	LGG_00797	birA	biotin--[acetyl-CoA-carboxylase] synthetase	3023.33	3005.67	2008	3097	2191	1788
LGG_RS03760	LGG_00798	pepV	dipeptidase PepV	8195	7167.67	5722	8109	6612	5935
LGG_RS03765	LGG_00799	NO NAME	glycerophosphoryl diester phosphodiesterase	1763.67	1675.33	1241	1717	1940	2109
LGG_RS03770	LGG_00800	NO NAME	hypothetical protein	262.333	310	180	342	455	707
LGG_RS03775	LGG_00801	NO NAME	membrane protein	1327.67	1442.33	1055	1492	1602	1981
LGG_RS03780	LGG_00802	NO NAME	membrane protein	909.333	1099	699	1140	1040	1130
LGG_RS03785	LGG_00803	NO NAME	metallophosphatase	1763	1938	1211	2011	1576	1728
LGG_RS03790	LGG_00804	yunD	5'-nucleotidase	5674.67	6470.67	3366	6077	5284	7571
LGG_RS03795	LGG_00805	yutD	transcriptional regulator	4498	5236.67	2623	4693	4350	3810
LGG_RS03800	LGG_00806	nagD	haloacid dehalogenase	4825.33	5108	2774	4617	4190	4015
LGG_RS03805	LGG_00807	NO NAME	membrane protein	1766.67	1796.33	1210	1671	1830	2112
LGG_RS03810	LGG_00808	dedA	membrane protein	3834.67	3362	3543	3770	2388	1995
LGG_RS03815	LGG_00809	ltrC	hypothetical protein	2645.67	2173.33	2158	2413	2244	1791
LGG_RS03820	LGG_00810	trxB	ferredoxin--NADP reductase	3866.33	3382.33	3522	3624	3243	3603
LGG_RS03825	LGG_00811	ppiB	peptidyl-prolyl cis-trans isomerase	835.667	836.333	704	1005	1693	2547
LGG_RS03830	LGG_00812	yugI	general stress protein	2240.67	1852.33	1745	1994	3955	6958
LGG_RS03835	LGG_03015	16S rRNA	16S ribosomal RNA	0	0	0	0	0	0
LGG_RS03840	LGG_03005	23S rRNA	23S ribosomal RNA	0	0	0	0	0	0
LGG_RS03845	LGG_03010	5S rRNA	5S ribosomal RNA	0	0	0	0	0	0
LGG_RS03850	LGG_02946	tRNA-Val	tRNA-Val	0	0	0	0	0	0
LGG_RS03855	LGG_02947	tRNA-Lys	tRNA-Lys	109	94.6667	125	135	99	119
LGG_RS03860	LGG_02948	tRNA-Thr	tRNA-Thr	305.333	302.333	329	345	258	320
LGG_RS03865	LGG_02949	tRNA-Gly	tRNA-Gly	182	175	209	194	170	213
LGG_RS03870	LGG_02950	tRNA-Arg	tRNA-Arg	105.667	121.333	164	164	110	191
LGG_RS03875	LGG_02951	tRNA-Pro	tRNA-Pro	5.33333	11.6667	8	20	8	15
LGG_RS03880	LGG_02952	tRNA-Met	tRNA-Met	24.6667	26.6667	23	21	20	41
LGG_RS03885	LGG_02953	tRNA-Met	tRNA-Met	290	301	309	291	210	335
LGG_RS03890	LGG_02954	tRNA-Met	tRNA-Met	182.667	203.667	232	233	143	232
LGG_RS03895	LGG_02955	tRNA-Asp	tRNA-Asp	0	0.666667	0	1	0	3
LGG_RS03900	LGG_02956	tRNA-Phe	tRNA-Phe	59.6667	73.6667	69	81	110	130
LGG_RS03905	LGG_02957	tRNA-Gly	tRNA-Gly	22.3333	25.3333	24	26	20	66
LGG_RS03910	LGG_02958	tRNA-Ile	tRNA-Ile	16.3333	28.3333	20	34	24	25
LGG_RS03915	LGG_02959	tRNA-Ser	tRNA-Ser	43.3333	55	44	50	41	150
LGG_RS03920	LGG_02960	tRNA-Glu	tRNA-Glu	4.33333	3.66667	4	2	3	8
LGG_RS03925	LGG_02961	tRNA-Ser	tRNA-Ser	18	20.3333	28	17	17	64
LGG_RS03930	LGG_02962	tRNA-Met	tRNA-Met	0	0.666667	0	0	0	0
LGG_RS03935	LGG_02963	tRNA-Asp	tRNA-Asp	39	33.6667	32	44	22	51
LGG_RS03940	LGG_02964	tRNA-Phe	tRNA-Phe	61	61	62	57	57	143
LGG_RS03945	LGG_02965	tRNA-Tyr	tRNA-Tyr	1.33333	2.33333	2	2	3	4
LGG_RS03950	LGG_02966	tRNA-Trp	tRNA-Trp	35	30	35	36	25	57
LGG_RS03955	LGG_02967	tRNA-His	tRNA-His	91.6667	35.6667	61	47	47	62
LGG_RS03960	LGG_02968	tRNA-Gln	tRNA-Gln	29.6667	26.3333	39	32	16	47
LGG_RS03965	LGG_02969	tRNA-Cys	tRNA-Cys	205.667	172	204	179	198	287
LGG_RS03970	LGG_02970	tRNA-Leu	tRNA-Leu	304.333	264	337	246	323	464
LGG_RS03975	LGG_00823	NO NAME	DNA-directed RNA polymerase sigma-70 factor	1465.33	692.333	527	902	609	1277
LGG_RS03980	LGG_00824	ybeC	amino acid:proton symporter	1549.33	1040.67	1333	1091	1163	2099
LGG_RS03985	LGG_00825	rfaG	glycosyl transferase	3284.67	2938	2631	3171	2834	3776
LGG_RS03990	LGG_00826	cpoA	glycosyltransferase	3651	2758	3058	3110	3198	2643
LGG_RS03995	LGG_00827	NO NAME	membrane protein	1856.33	1313	1611	1407	1820	1585
LGG_RS04000	LGG_00828	araT	aminotransferase A	3208.67	2028.67	2669	2355	2477	2203
LGG_RS04005	LGG_00829	ykuJ	hypothetical protein	2662.33	2622	1724	2398	3688	4630
LGG_RS04010	LGG_00830	ltaS	glycerol phosphate lipoteichoic acid synthase	7203.33	6797.67	5457	7663	4947	5497
LGG_RS04015	LGG_00831	perR	peptide ABC transporter substrate-binding protein	554.667	464.333	360	500	387	829
LGG_RS04020	LGG_03014	16S rRNA	16S ribosomal RNA	0	0	0	0	0	0
LGG_RS04025	LGG_03004	23S rRNA	23S ribosomal RNA	0	0	0	0	0	0
LGG_RS04030	LGG_03009	5S rRNA	5S ribosomal RNA	0	0	0	0	0	0
LGG_RS04035	LGG_02971	tRNA-Asn	tRNA-Asn	0.333333	0	0	0	0	0
LGG_RS04040	LGG_02972	tRNA-Ser	tRNA-Ser	25.6667	17	17	18	23	72
LGG_RS04045	LGG_02973	tRNA-Val	tRNA-Val	5.66667	6.66667	6	7	8	9
LGG_RS04050	LGG_00841	NO NAME	hypothetical protein	465.333	544	348	510	431	400
LGG_RS04055	LGG_00842	metK	S-adenosylmethionine synthetase	9727.33	7315.67	6676	6984	6523	7952
LGG_RS04060	LGG_00843	mdr	multidrug MFS transporter	293.333	187.333	325	216	436	425
LGG_RS04065	LGG_00844	glnR	MerR family transcriptional regulator	204	277.667	203	311	239	277
LGG_RS04070	LGG_00845	lmrB	multidrug MFS transporter	460	492.333	631	563	289	261
LGG_RS04075	LGG_00846	NO NAME	hypothetical protein	496.667	464.667	650	483	250	218
LGG_RS04080	LGG_00847	NO NAME	phospholipid phosphatase	232.667	246.333	181	221	127	201
LGG_RS04085	LGG_00848	leuS	leucyl-tRNA synthetase	26743	17596.3	26136	20171	15403	7489
LGG_RS04090	LGG_00851	rfbX	transporter	4871.33	4216.33	3864	4556	3274	2436
LGG_RS04095	LGG_00852	rsuA	16S rRNA uridine-516 pseudouridylate synthase	4633.67	4145.33	3840	4378	3459	2549
LGG_RS04100	LGG_00853	yhcC	DNA-binding protein	1745	1509.33	1461	1570	1131	862
LGG_RS04105	LGG_00854	ycfG	carbohydrate kinase	6582	5880.33	4107	5398	5857	5355
LGG_RS04110	LGG_00855	NO NAME	NUDIX hydrolase	4232.33	3670.67	2575	3426	3864	3600
LGG_RS04115	LGG_02999	tRNA-Leu	tRNA-Leu	12.3333	10.6667	3	17	22	71
LGG_RS04120	LGG_00856	bsaA	glutathione peroxidase	400	345.333	276	383	156	144
LGG_RS04125	LGG_00857	malY	aminotransferase	1209	1024.67	1015	1257	767	856
LGG_RS04130	pseudo-gene	NO NAME	phosphohydrolase	1816	1397.67	1287	1366	1681	1770
LGG_RS04135	LGG_00860	gcvR	hypothetical protein	355.333	309.667	249	300	186	206
LGG_RS04140	LGG_00861	NO NAME	hypothetical protein	3316.33	2006.33	2513	2054	1592	1158
LGG_RS04145	LGG_00862	coiA	competence protein	355	388	276	365	280	180
LGG_RS04150	LGG_00863	NO NAME	dihydroorotate dehydrogenase	1200.33	1298.67	725	1329	962	1710
LGG_RS04155	LGG_00864	NO NAME	adenylate cyclase	646	935.333	396	809	437	516
LGG_RS04160	LGG_00865	relA	GTP pyrophosphokinase	1834	1775.67	1002	1571	2073	1972
LGG_RS04165	LGG_00866	ppnK	inorganic polyphosphate/ATP-NAD kinase	2233.67	2066	1215	1789	1964	1855
LGG_RS04170	LGG_00867	rluD	pseudouridine synthase	2068.33	1730.33	1087	1367	1827	1568
LGG_RS04175	LGG_00868	apbE	thiamine biosynthesis protein	2283.33	2227.67	1562	2299	2879	3954
LGG_RS04180	LGG_00869	cutC	copper homeostasis protein CutC	2768.67	2384	2806	2649	2146	1856
LGG_RS04185	LGG_00870	bacA	UDP-diphosphatase	2593	2381	2302	2659	1719	1737
LGG_RS04190	LGG_00871	ykgB	hypothetical protein	3794	3916	2991	3587	3772	5527
LGG_RS04195	LGG_00872	pts	PTS glucose transporter subunit IIABC	1805.33	1712.67	1266	1730	2108	2574
LGG_RS04200	LGG_00873	rpsN	30S ribosomal protein S14	3060.33	3280	2985	3300	1606	5366
LGG_RS04205	LGG_00874	guaC	GMP reductase	9871.67	10080	10924	11544	3043	3971
LGG_RS04210	LGG_00875	corA	magnesium transporter	1105.33	1194	855	1205	1039	1754
LGG_RS04215	LGG_00876	rrmA	SAM-dependent methyltransferase	278.667	260.667	223	278	391	635
LGG_RS04220	LGG_00878	cspR	RNA methyltransferase	2509.33	1742.33	2243	1942	2781	3165
LGG_RS04225	LGG_00879	yqaD	hypothetical protein	4221	2753.33	3461	3238	4435	4139
LGG_RS04230	LGG_00882	ftsK	cell division protein FtsK	8803.67	8132	6740	8447	9640	8804
LGG_RS04235	LGG_00883	NO NAME	Zn-dependent peptidase	4584.33	3933.67	3645	4036	4780	3571
LGG_RS04240	LGG_00884	ymfH	zinc protease	4582.33	3783.33	3517	3658	4394	3181
LGG_RS04245	LGG_00885	fabG	3-oxoacyl-ACP reductase	2238.33	1850	1659	1755	2217	1665
LGG_RS04250	LGG_00886	NO NAME	XRE family transcriptional regulator	10035.7	8766.33	7626	8847	6282	7224
LGG_RS04255	LGG_00887	pgsA	CDP-diacylglycerol--glycerol-3-phosphate 3-phosphatidyltransferase	5684	5007.33	4357	4925	3818	4252
LGG_RS04260	LGG_00888	cinA	damage-inducible protein A	3009	2785.67	1695	2477	3841	4624
LGG_RS04265	LGG_00889	recA	recombinase RecA	2795.67	2625	1564	2198	3674	3163
LGG_RS04270	LGG_00892	cvfA	ribonuclease	19512.7	20210.3	12813	18070	20977	20247
LGG_RS04275	LGG_00893	yigZ	hypothetical protein	669	645	459	655	923	1007
LGG_RS04280	LGG_00894	comFA	competence protein ComF	38.3333	49	21	41	73	79
LGG_RS04285	not predicted	NO NAME	competence protein ComF	13	14.3333	6	19	23	34
LGG_RS04290	LGG_00896	yfiA	sigma-54 modulation protein	8545	8725.67	5375	9765	5107	14971
LGG_RS04295	LGG_00899	secA	preprotein translocase subunit SecA	37311.7	37599.3	31328	39043	20651	21822
LGG_RS04300	LGG_00900	prfB	peptide chain release factor 2	9692.33	10627	8880	10801	5197	5115
LGG_RS04305	LGG_00901	ftsE	cell division protein FtsE	5421.67	5759	5211	6127	3340	3628
LGG_RS04310	LGG_00902	ftsX	cell division protein FtsX	4960.67	5155	4733	4995	3721	3919
LGG_RS04315	LGG_00903	NO NAME	cell division protein MinJ	3262	3262.67	2252	2991	3859	6190
LGG_RS04320	LGG_00904	phoP2	two-component system response regulator	3296	3215.67	2451	3095	3748	4706
LGG_RS04325	LGG_00905	phoR2	signal transduction histidine kinase	3738.33	3034.33	2586	2780	3204	3308
LGG_RS04330	LGG_00906	pstS	phosphate-binding protein	2179	1594.33	1367	1653	1956	2113
LGG_RS04335	LGG_00907	pstC	phosphate ABC transporter permease	3199.67	2394	2042	2166	2615	2807
LGG_RS04340	LGG_00908	pstA	phosphate ABC transporter permease	2990	2091	1807	1954	2136	2255
LGG_RS04345	LGG_00909	pstB	phosphate ABC transporter ATP-binding protein	4950.33	3602	2779	3441	3276	3339
LGG_RS04350	LGG_00910	pstB	phosphate ABC transporter ATP-binding protein	5281	4024	3064	3700	3849	3652
LGG_RS04355	LGG_00911	phoU	PhoU family transcriptional regulator	4482.67	3182.33	2464	2973	3193	3234
LGG_RS04360	LGG_00912	is33	transposase	196.667	206.667	137	200	256	240
LGG_RS04365	LGG_00913	is34	transposase	81.6667	96	47	77	96	97
LGG_RS04370	LGG_00914	NO NAME	hypothetical protein	7223	5970.33	5332	6492	3467	2963
LGG_RS04375	LGG_00915	NO NAME	hypothetical protein	443.667	393.667	327	390	240	285
LGG_RS04380	LGG_00916	NO NAME	membrane protein	1218	1127.33	848	1215	629	822
LGG_RS04385	LGG_00917	hprK	HPr kinase/phosphorylase	7562	6826.33	5684	7070	5544	4813
LGG_RS04390	LGG_00918	lgt	prolipoprotein diacylglyceryl transferase	8203	6377.33	6137	6885	5943	4285
LGG_RS04395	LGG_00919	gpsA	glycerol-3-phosphate dehydrogenase	11568.7	8028.33	9222	8334	8931	5862
LGG_RS04400	LGG_00920	trxB	thioredoxin reductase	17959.3	13855	13638	14308	12312	13338
LGG_RS04405	LGG_00921	pgm	phosphoglucomutase	39471.3	33295.3	26015	41860	16521	23969
LGG_RS04410	LGG_00922	NO NAME	hydrolase	2210.33	2424	1688	2726	812	776
LGG_RS04415	LGG_00923	uvrB	excinuclease ABC subunit B	7658.67	8905.33	6413	9352	4853	4045
LGG_RS04420	LGG_00924	uvrA	excinuclease ABC subunit A	9575	8913	7926	9137	7299	6826
LGG_RS04425	LGG_00925	NO NAME	membrane protein	1946	1676	1413	1647	2105	2996
LGG_RS04430	LGG_00927	NO NAME	ATPase P	5993.33	5392.67	4225	5199	5255	4625
LGG_RS04435	LGG_00928	yvcK	hypothetical protein	9392	8300	6481	7466	8692	6786
LGG_RS04440	LGG_00929	yvcL	sporulation regulator WhiA	6008.67	5264	4161	4638	6062	4312
LGG_RS04445	LGG_00930	ohrR	MarR family transcriptional regulator	3434.67	3438.67	2261	3181	2852	2574
LGG_RS04450	LGG_00931	clpP	ATP-dependent Clp protease proteolytic subunit	22129	18681	13922	19333	6902	10722
LGG_RS04455	LGG_02974	tRNA-Arg	tRNA-Arg	459.333	311	306	379	230	322
LGG_RS04460	LGG_00932	cggR	SorC family transcriptional regulator	36439.3	45832	29576	39673	60360	67887
LGG_RS04465	LGG_00933	gapA	glyceraldehyde-3-phosphate dehydrogenase	490450	343009	308506	295277	387091	450716
LGG_RS04470	LGG_00934	pgk	phosphoglycerate kinase	351491	210668	202197	188317	266825	166247
LGG_RS04475	LGG_00935	tpiA	triosephosphate isomerase	294007	182682	162530	161738	201347	102766
LGG_RS04480	LGG_00936	eno	enolase	561708	355365	322967	322806	422126	277039
LGG_RS04485	LGG_00937	NO NAME	hypothetical protein	879.333	780.667	346	449	1604	1556
LGG_RS04490	LGG_00938	eriC	ATP synthase F0 subunit A	3012.33	2669.67	1904	2272	5567	4198
LGG_RS04495	LGG_00939	NO NAME	hypothetical protein	845.333	738	593	686	1475	1345
LGG_RS04500	LGG_00940	secG	preprotein translocase subunit SecG	1887	1710.67	1197	1773	2307	1851
LGG_RS04505	LGG_00941	yvaK	esterase	2504	2993	4224	6681	3361	2241
LGG_RS04510	LGG_00942	rnr	exoribonuclease R	18835.3	16294.7	34595	34840	18608	13231
LGG_RS04515	LGG_00943	smpB	SsrA-binding protein	4746.33	4013	8592	8202	4901	3296
LGG_RS04520	LGG_00944	nplT	neopullulanase	1650.33	1903.33	732	1870	1182	1490
LGG_RS04525	LGG_00945	mapA	maltose phosphorylase	2333	2546.67	1052	2457	1648	1694
LGG_RS04530	LGG_00946	pgmB	beta-phosphoglucomutase	467.333	519.333	208	511	317	355
LGG_RS04535	LGG_00947	NO NAME	hypothetical protein	622.667	581.333	338	533	1659	2237
LGG_RS04540	LGG_00948	NO NAME	DNA-binding protein	437.667	383.667	203	338	1108	1938
LGG_RS04545	LGG_00949	NO NAME	MBL fold hydrolase	5639.67	2966.33	3331	3110	5756	7447
LGG_RS04550	LGG_00950	NO NAME	hypothetical protein	0	0	0	0	0	0
LGG_RS04555	LGG_00951	malE	ABC transporter substrate-binding protein	66192.3	43266	30228	33583	61588	36026
LGG_RS04560	LGG_00952	malF	sugar ABC transporter permease	33480.7	21876.7	14959	17176	32183	22382
LGG_RS04565	LGG_00953	malG	ABC transporter permease	30328.3	20554.7	13053	16434	29840	24710
LGG_RS04570	LGG_00954	malK	ABC transporter ATP-binding protein	36376	26669.3	16474	21062	36617	31124
LGG_RS04575	LGG_00955	NO NAME	GNAT family acetyltransferase	391.667	328.667	384	361	722	1484
LGG_RS04580	LGG_00956	NO NAME	hypothetical protein	1610.33	1465.67	1034	1375	1318	1285
LGG_RS04585	LGG_00957	ycsE	haloacid dehalogenase	4196.67	3649.67	2666	3642	3290	3478
LGG_RS04590	LGG_00958	ung	uracil-DNA glycosylase	3116.67	2680.67	2078	2546	3427	4157
LGG_RS04595	LGG_00959	pta	phosphotransacetylase	9977.67	6309.33	4778	7316	6488	8102
LGG_RS04600	LGG_00960	yeeE	tRNA threonylcarbamoyladenosine biosynthesis protein TsaE	3672	2425	1615	2893	2640	3469
LGG_RS04605	LGG_00961	natA	sodium ABC transporter ATP-binding protein	2682	2778.33	2147	2881	1611	1484
LGG_RS04610	LGG_00962	natB	ABC transporter permease	3836	3315	3486	3936	2494	1934
LGG_RS04615	LGG_00963	dnaQ	DNA polymerase III subunit alpha	1392.67	1018.67	945	1049	1095	1198
LGG_RS04620	LGG_00964	exoA	exodeoxyribonuclease III	1640	1362.33	1159	1424	1453	1357
LGG_RS04625	LGG_00965	NO NAME	hypothetical protein	0	0	0	0	0	0
LGG_RS04630	LGG_00966	murB	UDP-N-acetylenolpyruvoylglucosamine reductase	7265.33	8226.67	5229	8429	4429	6146
LGG_RS04635	LGG_00967	NO NAME	sodium:proton antiporter	3403.33	4210	2755	4317	2252	3994
LGG_RS04640	LGG_00968	NO NAME	Cro/Cl family transcriptional regulator	790.667	1863.67	484	1618	316	309
LGG_RS04645	LGG_00969	potA	spermidine/putrescine ABC transporter ATP-binding protein	1110.33	2221	741	2085	487	569
LGG_RS04650	LGG_00970	potB	spermidine/putrescine ABC transporter permease	572.333	1074.33	415	1000	298	269
LGG_RS04655	LGG_00971	potC	spermidine/purescine ABC transporter permease	671.333	1294.67	518	1253	399	260
LGG_RS04660	LGG_00972	potD	spermidine/putrescine ABC transporter substrate-binding protein	1041.33	1851.67	765	1798	518	388
LGG_RS04665	LGG_00973	NO NAME	hypothetical protein	550.667	700	222	828	877	1539
LGG_RS04670	LGG_00974	NO NAME	hypothetical protein	272.333	328.333	123	327	436	1010
LGG_RS04675	LGG_00975	NO NAME	hypothetical protein	126.333	138.333	88	123	149	161
LGG_RS04680	LGG_00976	pacL	haloacid dehalogenase	13366	11802.7	11104	13326	5799	4244
LGG_RS04685	LGG_00977	NO NAME	TetR family transcriptional regulator	675	659	506	692	685	440
LGG_RS04690	LGG_00978	NO NAME	ABC transporter permease	1056.33	1031.33	826	1092	1200	853
LGG_RS04695	LGG_00979	yhiH	ABC transporter ATP-binding protein	563.667	515.333	405	528	721	610
LGG_RS04700	LGG_00980	ossG	membrane protein	2713.67	2691	2119	2889	2522	2759
LGG_RS04705	LGG_00981	NO NAME	hypothetical protein	6149.67	5473.33	4722	5645	5246	3713
LGG_RS04710	LGG_00982	glmM	phosphoglucosamine mutase	4855.67	3700.67	3653	3618	4690	3717
LGG_RS04715	LGG_00983	glmS	glucosamine--fructose-6-phosphate aminotransferase	37608.7	12869.7	32473	14130	18218	27869
LGG_RS04720	LGG_00984	pepF	oligoendopeptidase	17391.3	12177	14821	12702	5823	2280
LGG_RS04725	LGG_00985	NO NAME	membrane protein	268	164.333	234	175	248	176
LGG_RS04730	LGG_00986	yebC	transcriptional regulator	15733.7	10427.3	10480	10509	14938	5487
LGG_RS04735	LGG_00987	comGA	type II secretory pathway protein	77.6667	107	57	112	117	173
LGG_RS04740	LGG_00988	gomGB	type II secretion system protein F	128.667	155	72	141	190	206
LGG_RS04745	LGG_00989	gomGC	competence protein ComGC	25	24.6667	20	30	21	27
LGG_RS04750	LGG_00990	NO NAME	competence protein ComGC	42.3333	40	16	39	31	34
LGG_RS04755	LGG_00991	NO NAME	hypothetical protein	14.3333	25.3333	7	28	27	30
LGG_RS04760	LGG_00992	NO NAME	hypothetical protein	50.6667	68	38	55	93	46
LGG_RS04765	LGG_00993	NO NAME	hypothetical protein	44.6667	44	39	50	74	45
LGG_RS04770	LGG_00994	laaG	lactate dehydrogenase	6699	6650.67	4275	6147	8458	8278
LGG_RS04775	LGG_00995	NO NAME	hypothetical protein	624	706.333	478	717	465	498
LGG_RS04780	LGG_00996	cycA	alanine glycine permease	2270	2462.33	2132	2420	2220	2473
LGG_RS04785	LGG_00997	arbV	1-acyl-sn-glycerol-3-phosphate acyltransferase	1281.33	1238	1322	1175	1484	1245
LGG_RS04790	LGG_00998	arbX	glycosyl transferase	847	801.667	796	758	939	938
LGG_RS04795	LGG_00999	arbY	glycosyl transferase	1148.33	1096.33	1053	1052	1337	1036
LGG_RS04800	LGG_01000	arbZ	1-acyl-sn-glycerol-3-phosphate acyltransferase	910	764.333	771	658	1086	869
LGG_RS04805	LGG_01001	galA	alpha-galactosidase	1397.67	3177.33	813	2581	815	1857
LGG_RS04810	LGG_01002	NO NAME	membrane protein	1933	2404.67	1455	2361	905	801
LGG_RS04815	LGG_01003	phoP3	two-component system response regulator	5151.33	5537	4181	5378	2441	1798
LGG_RS04820	LGG_01004	phoR3	two-component system sensor histidine kinase	8709	8270.67	6997	7954	4012	2767
LGG_RS04825	LGG_01005	NO NAME	acetyltransferase	2483.67	2326.67	1848	2209	1461	1375
LGG_RS04830	LGG_01006	NO NAME	hypothetical protein	496	596.667	301	561	415	430
LGG_RS04835	LGG_01007	pheB	hypothetical protein	835.333	1081.67	567	1061	714	1042
LGG_RS04840	LGG_01008	NO NAME	hypothetical protein	801.333	893	585	925	709	887
LGG_RS04845	LGG_01009	NO NAME	acetyl-CoA carboxylase	82.3333	104.333	69	104	89	65
LGG_RS04850	LGG_01010	umuC	type VI secretion protein ImpB	297	456.667	238	449	346	334
LGG_RS04855	not predicted	NO NAME	hypothetical protein	806.333	692	671	768	710	1147
LGG_RS04860	LGG_01012	NO NAME	membrane protein	2877.67	2247	2499	2575	2467	2237
LGG_RS04865	LGG_01013	NO NAME	lysophospholipase	1079.33	866.333	878	1002	966	1134
LGG_RS04870	LGG_01014	NO NAME	membrane protein	373.333	299.333	291	334	378	535
LGG_RS04875	LGG_01015	pcrA	ATP-dependent DNA helicase PcrA	8330.33	8430.33	7246	8205	13177	12514
LGG_RS04880	LGG_01016	ligA	NAD-dependent DNA ligase LigA	8486.33	7046.67	7877	6942	11170	7572
LGG_RS04885	LGG_01017	camS	CamS family sex pheromone protein	8144.33	6097.33	7598	6144	7997	4779
LGG_RS04890	LGG_01018	gatC	glutamyl-tRNA amidotransferase subunit C	6125	4681.33	5005	4781	6608	4918
LGG_RS04895	LGG_01019	gatA	aspartyl/glutamyl-tRNA amidotransferase subunit A	28469	20359.3	23069	20806	30594	28181
LGG_RS04900	LGG_01020	gatB	aspartyl/glutamyl-tRNA amidotransferase subunit B	31234	21333.3	24894	21720	34301	28911
LGG_RS04905	LGG_01021	yerQ	lipid kinase	4923.33	3109	3878	3004	4547	1448
LGG_RS04910	LGG_01022	rumA	RNA methyltransferase	7541.33	5320.67	5270	4622	5700	2280
LGG_RS04915	pseudo-gene	NO NAME	hypothetical protein	3095.67	2809.33	2056	2109	2338	870
LGG_RS04920	LGG_01025	is36	transposase	0	0	0	0	0	0
LGG_RS04925	pseudo-gene	NO NAME	DNA methylase	752	950	414	572	1179	479
LGG_RS04930	LGG_01027	res	type III restriction endonuclease StyLTI	809.667	916.333	524	630	1207	585
LGG_RS04935	LGG_01029	is37	transposase	3.66667	2.33333	0	2	5	9
LGG_RS04940	LGG_01030	yttB	MFS transporter permease	438	266.333	375	271	639	334
LGG_RS04945	LGG_01031	NO NAME	haloacid dehalogenase	703	402.333	561	370	850	413
LGG_RS04950	LGG_01032	murQ	hypothetical protein	2756	2599	1632	3089	1241	1657
LGG_RS04955	LGG_01033	pepO	endopeptidase	9884	7279	7256	8121	5612	5927
LGG_RS04960	LGG_01034	NO NAME	acetyltransferase	1021.33	828.333	744	877	1170	1126
LGG_RS04965	LGG_01036	degV	hypothetical protein	2449	2519	1665	2551	2504	3195
LGG_RS04970	LGG_01037	hflC	hypothetical protein	3509	3393	1958	3556	3428	4418
LGG_RS04975	LGG_01038	NO NAME	hypothetical protein	1132.33	1129	706	1219	1170	960
LGG_RS04980	LGG_01039	NO NAME	lyzozyme M1 (1%2C4-beta-N-acetylmuramidase)	421	333.667	324	325	542	715
LGG_RS04985	LGG_01040	NO NAME	hypothetical protein	1985.33	413.333	1692	371	2130	747
LGG_RS04990	LGG_01042	NO NAME	hypothetical protein	617.333	555.667	436	556	515	903
LGG_RS04995	LGG_01043	ygjR	alanine-phosphoribitol ligase	4354.67	3831	3074	4168	3396	3432
LGG_RS05000	LGG_01044	rhe	helicase	5943.33	5066.33	4353	5182	5540	4149
LGG_RS05005	LGG_01045	pts	PTS cellobiose transporter subunit IIA	3460.33	2658.33	2289	2604	3095	3449
LGG_RS05010	LGG_01047	NO NAME	hypothetical protein	2710.67	2074.67	1775	1976	2086	1910
LGG_RS05015	LGG_02975	tRNA-Arg	tRNA-Arg	109.333	88.3333	62	83	93	112
LGG_RS05020	LGG_01048	NO NAME	hypothetical protein	398.333	421.667	251	462	325	332
LGG_RS05025	LGG_01049	recQ	ATP-dependent DNA helicase RecQ	1387.33	1512.33	1159	1484	1357	1332
LGG_RS05030	LGG_01050	ampS	peptidase	724.333	549.667	646	669	602	555
LGG_RS05035	LGG_01051	NO NAME	TetR family transcriptional regulator	936	597	797	636	2025	2225
LGG_RS05040	LGG_01053	NO NAME	hypothetical protein	2795	2913.67	1945	2868	1902	2516
LGG_RS05045	LGG_01054	NO NAME	hypothetical protein	592.667	538.333	430	540	562	783
LGG_RS05050	LGG_01055	fldA	flavodoxin	2085	1912.33	1211	1972	2144	2997
LGG_RS05055	LGG_01056	map	methionine aminopeptidase	5622.33	5189	4040	5025	5127	6600
LGG_RS05060	LGG_01057	NO NAME	glycosyl transferase family 2	5289	5409.67	3770	5274	3346	2537
LGG_RS05065	LGG_01059	NO NAME	hypothetical protein	423	416.667	316	420	294	308
LGG_RS05070	LGG_01060	NO NAME	hypothetical protein	562.333	591.333	407	551	400	297
LGG_RS05075	LGG_01061	mvaK	phosphomevalonate kinase	9151.33	8051.67	6598	7548	6223	7194
LGG_RS05080	LGG_01062	galU	UTP--glucose-1-phosphate uridylyltransferase	26034.7	23761	15839	25262	10307	13025
LGG_RS05085	LGG_01063	NO NAME	hypothetical protein	148.333	140.333	89	138	35	79
LGG_RS05090	LGG_01064	bglA	6-phospho-beta-glucosidase	71.3333	108	26	97	56	144
LGG_RS05095	LGG_01065	bglH	PTS beta-glucoside transporter subunit IIABC	46.6667	51.6667	30	66	76	67
LGG_RS05100	LGG_01066	NO NAME	membrane protein	1600.33	2222.67	1759	2515	1054	1385
LGG_RS05105	LGG_01068	NO NAME	hypothetical protein	1115.67	1194.33	858	1226	907	1529
LGG_RS05110	LGG_01069	gtrB	glucosyl transferase family 2	2634	2466	1775	2477	1696	2228
LGG_RS05115	LGG_01070	NO NAME	hypothetical protein	1601.33	1477.33	1165	1460	1191	1079
LGG_RS05120	LGG_01071	NO NAME	membrane protein	400.667	327.333	288	319	587	630
LGG_RS05125	LGG_01072	cspC	cold-shock protein	12205	5543.67	8436	5736	10122	13657
LGG_RS05130	LGG_01073	NO NAME	hypothetical protein	261.667	287	95	230	424	466
LGG_RS05135	LGG_01074	NO NAME	GNAT family acetyltransferase	804.333	915.667	444	733	1053	1050
LGG_RS05140	LGG_01075	acmA	N-acetylmuramidase	1140.33	1313.67	596	1067	1544	1668
LGG_RS05145	LGG_01076	xpt	xanthine phosphoribosyltransferase	4109.33	4106.33	3413	4421	2087	1497
LGG_RS05150	LGG_01077	pbuX	xanthine permease	12312.3	9935	10279	10448	4966	2513
LGG_RS05155	LGG_01078	purK	phosphoribosylaminoimidazole carboxylase	13813.3	10041	9847	10450	5196	2715
LGG_RS05160	LGG_01079	purB	adenylosuccinate lyase	20167.7	13639.7	10498	13525	7526	4440
LGG_RS05165	LGG_01080	NO NAME	branched-chain amino acid ABC transporter ATP-binding protein	618	700	445	567	426	512
LGG_RS05170	LGG_01081	NO NAME	hypothetical protein	1061.33	1067.67	968	1018	634	857
LGG_RS05175	LGG_01082	ltaS	alkaline phosphatase	4236.67	2809.67	4653	3559	2432	2135
LGG_RS05180	LGG_01083	vanZ	glycopeptide antibiotics resistance protein	1205.33	930.667	934	962	1506	1184
LGG_RS05185	LGG_01084	glcU	glucose transporter GlcU	1836	1590.67	1678	1620	2286	2064
LGG_RS05190	LGG_01085	pgi	glucose-6-phosphate isomerase	91970.7	72456.7	58494	76397	42750	67148
LGG_RS05195	LGG_01086	int	integrase	294	237.333	177	173	459	243
LGG_RS05200	LGG_01087	NO NAME	hypothetical protein	907	582	464	439	949	512
LGG_RS05205	LGG_01088	NO NAME	hypothetical protein	6370	4316.67	3372	3264	7324	2969
LGG_RS05210	LGG_01089	NO NAME	hypothetical protein	1721.67	1133.67	885	889	2038	646
LGG_RS05215	LGG_01090	NO NAME	pyridoxamine 5-phosphate oxidase	3395	2437.67	1935	1915	4124	1470
LGG_RS05220	LGG_01091	NO NAME	hypothetical protein	2568.33	2148.33	1613	1769	2759	1153
LGG_RS05225	LGG_01092	NO NAME	hypothetical protein	7942.67	6300.67	4608	5380	8179	4123
LGG_RS05230	LGG_01093	NO NAME	hypothetical protein	7321.67	5956.33	4253	5040	7980	4694
LGG_RS05235	LGG_01094	NO NAME	toxin	2079.33	2176.67	1201	1877	1634	1550
LGG_RS05240	LGG_01095	Cpg	Cro/Cl family transcriptional regulator	1389.33	1526	911	1432	1220	1184
LGG_RS05245	LGG_01096	NO NAME	hypothetical protein	280.333	297	147	225	370	414
LGG_RS05250	not predicted	NO NAME	hypothetical protein	465.333	493.333	284	417	612	711
LGG_RS05255	LGG_01097	NO NAME	hypothetical protein	345.667	338.667	213	299	445	652
LGG_RS05260	LGG_01099	NO NAME	hypothetical protein	1039.33	1043	654	854	1315	1155
LGG_RS05265	LGG_01100	NO NAME	hypothetical protein	196.333	181.333	108	172	251	280
LGG_RS05270	LGG_01102	NO NAME	hypothetical protein	192.667	209.667	143	200	282	268
LGG_RS05275	LGG_01103	NO NAME	hypothetical protein	213.333	205.333	142	191	256	162
LGG_RS05280	LGG_01104	NO NAME	DNA recombination protein RecT	915.667	933.333	649	827	1288	855
LGG_RS05285	LGG_01105	NO NAME	hypothetical protein	899	900	619	775	1281	791
LGG_RS05290	LGG_01106	NO NAME	phage protein	1123	1132.67	747	986	1567	1212
LGG_RS05295	LGG_01107	ssb3	single-stranded DNA-binding protein	588.667	621.667	443	559	971	1031
LGG_RS05300	LGG_01108	NO NAME	DNA-binding protein	228	227.333	151	202	353	377
LGG_RS05305	LGG_01109	NO NAME	DNA-binding protein	154	141.333	74	135	228	302
LGG_RS05310	LGG_01110	NO NAME	hypothetical protein	461	414.667	253	340	516	193
LGG_RS05315	LGG_01111	NO NAME	hypothetical protein	267.667	220	186	225	295	108
LGG_RS05320	LGG_01112	NO NAME	hypothetical protein	514.333	460.667	301	369	578	205
LGG_RS05325	LGG_01113	NO NAME	hypothetical protein	547.333	464	382	375	562	197
LGG_RS05330	LGG_01114	NO NAME	hypothetical protein	230.333	197	138	153	234	64
LGG_RS05335	LGG_01115	NO NAME	hypothetical protein	344.333	315.667	238	263	361	219
LGG_RS05340	LGG_01116	NO NAME	hypothetical protein	82	72	63	75	98	58
LGG_RS05345	not predicted	NO NAME	hypothetical protein	158	143.667	127	148	219	99
LGG_RS05350	not predicted	NO NAME	hypothetical protein	263	263.333	182	237	454	171
LGG_RS05355	LGG_01117	NO NAME	hypothetical protein	224.333	200	150	183	341	155
LGG_RS05360	LGG_01118	NO NAME	hypothetical protein	286.333	259.333	212	233	429	182
LGG_RS05365	not predicted	NO NAME	hypothetical protein	106.333	112	70	122	178	111
LGG_RS05370	LGG_01120	NO NAME	transcriptional regulator	335.667	244	199	211	472	280
LGG_RS05375	LGG_01121	NO NAME	hypothetical protein	271	358	205	305	324	232
LGG_RS05380	LGG_01122	NO NAME	endonuclease	150	187.667	107	158	175	119
LGG_RS05385	LGG_01123	NO NAME	ribonucleoside-diphosphate reductase	98	121.333	68	110	103	62
LGG_RS05390	LGG_01124	Rorf172	terminase	132	156.667	89	139	192	182
LGG_RS05395	LGG_01125	Rorf447	terminase	429	531	272	461	662	574
LGG_RS05400	LGG_01126	NO NAME	hypothetical protein	515.333	621.333	295	525	663	494
LGG_RS05405	LGG_01127	NO NAME	phage head morphogenesis protein	311.667	352.333	231	294	389	224
LGG_RS05410	LGG_01128	NO NAME	hypothetical protein	654.333	831.333	460	770	573	359
LGG_RS05415	LGG_01129	gpG	phage capsid protein	559.333	700.667	434	705	573	452
LGG_RS05420	LGG_01130	NO NAME	hypothetical protein	271.667	349	171	289	253	184
LGG_RS05425	LGG_01131	NO NAME	hypothetical protein	173	210.667	121	175	176	105
LGG_RS05430	LGG_01132	NO NAME	phage head-tail joining protein	165	207.333	123	182	169	129
LGG_RS05435	LGG_01133	NO NAME	hypothetical protein	342	457	232	386	320	172
LGG_RS05440	LGG_01134	NO NAME	phage tail protein	309	417	184	349	290	255
LGG_RS05445	LGG_01135	NO NAME	hypothetical protein	119.667	145.333	78	119	122	67
LGG_RS05450	LGG_01136	NO NAME	hypothetical protein	146.333	179.333	98	136	157	76
LGG_RS05455	LGG_01137	NO NAME	phage tail tape measure protein	574.333	684.667	352	548	778	628
LGG_RS05460	LGG_01138	NO NAME	phage tail protein	464.667	604	299	526	688	540
LGG_RS05465	LGG_01139	NO NAME	phage tail protein	524	623	320	542	696	476
LGG_RS05470	LGG_01140	NO NAME	phage infection protein	15	14	3	8	19	26
LGG_RS05475	LGG_01141	NO NAME	hypothetical protein	63.6667	97.3333	25	78	89	70
LGG_RS05480	LGG_01142	hol	holin	73.6667	95	51	87	88	73
LGG_RS05485	LGG_01143	lys	1%2C4-beta-N-acetylmuramidase	240.667	317.333	166	243	369	381
LGG_RS05490	LGG_01144	ycnE	antibiotic biosynthesis monooxygenase	806.333	628	487	615	947	917
LGG_RS05495	LGG_01145	laaO	XRE family transcriptional regulator	828	692.667	467	733	971	1752
LGG_RS05500	LGG_01146	NO NAME	hypothetical protein	654	605.667	344	646	809	2051
LGG_RS05505	LGG_01147	NO NAME	glycosyltransferase	5684.33	6995	4544	8249	2754	7973
LGG_RS05510	LGG_01148	ysjB	alanine-phosphoribitol ligase	6359.33	6474	4889	6871	3161	4705
LGG_RS05515	LGG_01149	guaD	cytosine deaminase	3707	3933	2957	4199	1903	2346
LGG_RS05520	LGG_02976	tRNA-Glu	tRNA-Glu	603	481.333	438	496	233	412
LGG_RS05525	LGG_01150	NO NAME	hypothetical protein	79	112.667	46	120	88	144
LGG_RS05530	LGG_01151	NO NAME	hypothetical protein	113.333	197	63	138	127	194
LGG_RS05535	LGG_01152	NO NAME	hypothetical protein	820	808.333	398	735	757	1477
LGG_RS05540	not predicted	NO NAME	transposase	361.333	447.333	197	398	482	829
LGG_RS05545	pseudo-gene	NO NAME	hypothetical protein	263.667	325.333	144	302	372	574
LGG_RS05550	LGG_01154	NO NAME	hypothetical protein	38.3333	57.3333	23	42	88	138
LGG_RS05555	pseudo-gene	NO NAME	MFS transporter	1113	826.667	826	802	881	1065
LGG_RS05560	LGG_01158	pepD	peptidase C69	8637	7719.33	7673	8034	8415	5903
LGG_RS05565	LGG_02977	tRNA-Gln	tRNA-Gln	62.6667	72	52	69	59	63
LGG_RS05570	LGG_01159	NO NAME	hypothetical protein	314.333	349	197	357	311	345
LGG_RS05575	LGG_01160	NO NAME	hypothetical protein	738.667	758	535	692	838	1113
LGG_RS05580	LGG_01161	pgm	phosphoglycerate mutase	1317	1420.33	849	1366	1527	1783
LGG_RS05585	LGG_01162	NO NAME	TetR family transcriptional regulator	1164.67	1164.67	1133	1235	1083	934
LGG_RS05590	LGG_01163	ycfI	multidrug ABC transporter ATP-binding protein	3363	2716.67	3231	3069	2816	2242
LGG_RS05595	LGG_01164	yfiC	multidrug ABC transporter ATP-binding protein	4935	3647	5023	4145	4086	3323
LGG_RS05600	LGG_01165	NO NAME	FMN reductase	661.333	649.333	396	572	786	1925
LGG_RS05605	LGG_01166	NO NAME	dioxygenase	278.333	519.667	141	534	302	714
LGG_RS05610	LGG_01167	ampC	serine hydrolase	1804	2064	1194	2160	1558	3178
LGG_RS05615	LGG_01168	murC	UDP-N-acetylmuramyl peptide synthase	6248.33	6136	4996	6126	4102	5361
LGG_RS05620	LGG_01169	tdk	thymidine kinase	1261	1519.33	971	1587	1821	2535
LGG_RS05625	LGG_01171	prfA	peptide chain release factor 1	4534.33	3627.67	3695	3409	5966	4887
LGG_RS05630	LGG_01172	hemK	N5-glutamine S-adenosyl-L-methionine-dependent methyltransferase	2268.33	1738.33	2030	1727	3107	3117
LGG_RS05635	LGG_01173	sua	translation factor Sua5	2985.67	2363.67	2644	2435	4110	4621
LGG_RS05640	LGG_01174	glyA	serine hydroxymethyltransferase	8846	6671.33	6691	7060	12298	9966
LGG_RS05645	LGG_01175	upp	uracil phosphoribosyltransferase	9140.67	6816.67	6661	6400	10759	10705
LGG_RS05650	LGG_01177	atpB	F0F1 ATP synthase subunit A	88708.3	71346.3	75599	61944	135006	73777
LGG_RS05655	LGG_01178	atpE	F0F1 ATP synthase subunit C	12331.7	8918.33	9609	7690	18487	14216
LGG_RS05660	LGG_01179	atpF	F0F1 ATP synthase subunit B	47221.3	32800.3	39540	28807	70436	42489
LGG_RS05665	LGG_01180	atpH	ATP synthase subunit delta	90905	61069	81213	54301	131488	54409
LGG_RS05670	LGG_01181	atpA	F0F1 ATP synthase subunit alpha	237308	151275	205909	132376	325655	142147
LGG_RS05675	LGG_01182	atpG	F0F1 ATP synthase subunit gamma	116524	74176.7	99278	64961	160423	69856
LGG_RS05680	LGG_01184	atpD	F0F1 ATP synthase subunit beta	216792	133339	181589	109710	281004	144323
LGG_RS05685	LGG_01185	atpC	F0F1 ATP synthase subunit epsilon	53343.3	31433	43173	24965	65770	39802
LGG_RS05690	LGG_01187	ywzB	membrane protein	944.333	1332	701	1224	1125	860
LGG_RS05695	LGG_01188	mreB	rod shape-determining protein MreB	12845	14354	9912	13688	8709	7527
LGG_RS05700	LGG_01189	NO NAME	DNA-directed RNA polymerase subunit beta	1355	1412.33	952	1292	873	865
LGG_RS05705	LGG_01190	NO NAME	membrane protein insertion efficiency factor YidD	3994.33	4276.33	3006	3976	2618	2103
LGG_RS05710	LGG_01191	NO NAME	hypothetical protein	2859.67	3011	2124	2826	1855	1109
LGG_RS05715	LGG_01192	rodA	cell division protein FtsW	10006	10546.7	7989	10198	8217	5978
LGG_RS05720	LGG_01193	gcsH2	glycine cleavage system protein H	3260	2849.33	2338	2651	3224	3400
LGG_RS05725	LGG_01194	dapE	succinyl-diaminopimelate desuccinylase	2779	2609	2613	2899	1854	2761
LGG_RS05730	LGG_01195	metQ	ABC transporter substrate-binding protein	222	172.667	248	172	179	307
LGG_RS05735	LGG_01196	metQ	ABC transporter substrate-binding protein	3334.67	2790.33	2803	2948	1735	1979
LGG_RS05740	LGG_01197	metN	methionine ABC transporter ATP-binding protein	3210	2388.67	2896	2561	1664	2045
LGG_RS05745	LGG_01198	metI	ABC transporter permease	1437.33	941.667	1256	955	783	1085
LGG_RS05750	LGG_01199	sufC	Fe-S cluster assembly ATPase SufC	2059.33	1594.67	1507	1549	1134	1011
LGG_RS05755	LGG_01200	sufD	ABC transporter permease	3348	1772.67	2263	1764	2023	1019
LGG_RS05760	LGG_01201	sufS	cysteine desulfurase	6698	4023.33	4865	4325	4376	2320
LGG_RS05765	LGG_01202	sufA/nifU	FeS assembly scaffold SufA	2587.67	1723.33	1958	1983	1912	909
LGG_RS05770	LGG_01203	sufB	Fe-S cluster assembly protein SufB	10673.7	7094	7786	7614	7321	3767
LGG_RS05775	LGG_01204	NO NAME	hypothetical protein	81.3333	69.6667	70	67	13715	15219
LGG_RS05780	LGG_01205	NO NAME	hypothetical protein	194	389	151	378	1630	953
LGG_RS05785	LGG_01206	NO NAME	membrane protein	851	1373	533	1339	4406	2817
LGG_RS05790	LGG_01207	NO NAME	XRE family transcriptional regulator	4907.33	3703	3138	3847	9070	5806
LGG_RS05795	LGG_01208	usp	universal stress protein UspA	5361	5387.67	3345	5253	3495	4791
LGG_RS05800	LGG_01209	NO NAME	hypothetical protein	403.667	451.333	310	459	310	489
LGG_RS05805	LGG_01211	cshA	recombinase RarA	1707.33	1259.33	1251	1264	1419	1195
LGG_RS05810	LGG_01213	NO NAME	glutamate--cysteine ligase	6904.33	5760.67	4904	5854	3352	2965
LGG_RS05815	LGG_01214	NO NAME	hypothetical protein	2393.33	2212	1600	2087	1408	1264
LGG_RS05820	LGG_01215	NO NAME	hypothetical protein	2015.33	1649.33	1325	1607	1087	727
LGG_RS05825	LGG_01216	sdhB	serine dehydratase subunit beta	3817.33	3823.67	2357	3520	2516	2112
LGG_RS05830	LGG_01217	sdhA	serine dehydratase subunit alpha	2561.67	2482.67	1572	2380	1898	1920
LGG_RS05835	LGG_01218	pgm	phosphoglycerate mutase	2825.33	2413.33	1603	2104	1967	1785
LGG_RS05840	LGG_01219	msrA	peptide methionine sulfoxide reductase	374	415.333	188	350	472	800
LGG_RS05845	LGG_01220	NO NAME	short-chain dehydrogenase	339.667	391	159	302	385	802
LGG_RS05850	LGG_01221	NO NAME	membrane protein	1457.33	1121.33	946	827	2576	3323
LGG_RS05855	LGG_01222	dgk	deoxynucleoside kinase	2203.67	1550.67	1585	1282	3896	3858
LGG_RS05860	LGG_01223	hisK	histidinol phosphatase	1028.67	1011	738	1029	1084	1481
LGG_RS05865	LGG_01224	oppA	peptide ABC transporter substrate-binding protein	1861.33	1440.33	1285	1488	1382	945
LGG_RS05870	LGG_01225	hpk1	two-component system sensor histidine kinase	1170.67	944.333	803	964	996	495
LGG_RS05875	LGG_01226	rr1	two-component system response regulator	875.333	685	565	771	799	499
LGG_RS05880	LGG_01227	bcrA	ABC transporter	789	1025.67	562	1226	324	362
LGG_RS05885	LGG_01228	NO NAME	ABC transporter	769	964.333	564	1148	344	349
LGG_RS05890	LGG_01229	hypR	LysR family transcriptional regulator	208	271.667	169	309	235	236
LGG_RS05895	LGG_01230	yphH	cupin	288	449.667	179	468	153	179
LGG_RS05900	LGG_01231	pcaC	4-carboxymuconolactone decarboxylase	249.667	409	207	378	145	132
LGG_RS05905	LGG_01232	NO NAME	hypothetical protein	394.667	237.667	261	245	659	693
LGG_RS05910	LGG_01233	NO NAME	acetyltransferase	342.333	243	223	215	649	483
LGG_RS05915	LGG_01234	NO NAME	GNAT family acetyltransferase	279	141.667	188	146	361	209
LGG_RS05920	LGG_01235	NO NAME	hypothetical protein	477.333	1063.67	335	1059	226	201
LGG_RS05925	LGG_01236	NO NAME	hypothetical protein	706	1150.67	477	1024	651	502
LGG_RS05930	LGG_01237	desR	transcriptional regulator	887.333	1080.67	661	1034	773	749
LGG_RS05935	LGG_01238	desK	two-component system sensor histidine kinase	1871	2138.67	1328	2188	1758	1883
LGG_RS05940	LGG_01239	NO NAME	multidrug ABC transporter permease	49.3333	38.3333	37	38	52	54
LGG_RS05945	LGG_01240	yvfR	multidrug ABC transporter ATP-binding protein	68	41	58	42	89	116
LGG_RS05950	LGG_01241	NO NAME	hypothetical protein	1166.33	1224.33	710	1107	847	910
LGG_RS05955	LGG_01242	NO NAME	hypothetical protein	2522	2593.67	1356	2354	955	794
LGG_RS05960	LGG_01243	NO NAME	chromosome segregation ATPase	5429.33	5282.33	3013	4398	2399	1672
LGG_RS05965	LGG_01244	NO NAME	hypothetical protein	979.333	939.333	527	701	483	360
LGG_RS05975	LGG_01245	NO NAME	hypothetical protein	764	1244.67	585	1088	352	521
LGG_RS05980	LGG_01246	NO NAME	hypothetical protein	704	1068.67	393	827	929	787
LGG_RS05985	LGG_01247	NO NAME	hypothetical protein	675	963.333	418	769	630	353
LGG_RS05990	not predicted	NO NAME	hypothetical protein	180.667	269.333	123	219	165	150
LGG_RS05995	LGG_01248	is39	transposase	2.33333	3.33333	4	3	5	2
LGG_RS06000	LGG_01249	tex	S1 RNA-binding protein	1018.67	863.667	614	604	3857	2624
LGG_RS06005	LGG_01250	NO NAME	hypothetical protein	1569	1290.67	756	1232	1780	2771
LGG_RS06010	LGG_01251	radC	glutamine amidotransferase	450	816.333	386	803	320	417
LGG_RS06015	LGG_01252	NO NAME	amino acid permease	1114.67	1611.33	810	1320	1254	1447
LGG_RS06020	LGG_01253	NO NAME	XRE family transcriptional regulator	694.333	696.333	309	496	820	1036
LGG_RS06025	LGG_01254	NO NAME	DNA helicase	4088	4847.67	1832	3730	5133	5491
LGG_RS06030	LGG_01255	rpsD	30S ribosomal protein S4	16246.7	11302.7	15209	11027	18287	25352
LGG_RS06035	LGG_01256	yebR	sensor histidine kinase	482.333	638.333	415	761	718	700
LGG_RS06040	LGG_01257	NO NAME	septation ring formation regulator EzrA	4018	3468.33	3170	3720	3092	2602
LGG_RS06045	LGG_01258	nifS	aminotransferase V	2128.67	2367	1885	2626	1946	2912
LGG_RS06050	LGG_01259	thiI	thiamine biosynthesis protein ThiI	2970.67	2927.67	2705	3307	2720	3527
LGG_RS06055	LGG_01260	rex	REX family transcriptional regulator	287	214.333	178	208	232	218
LGG_RS06060	LGG_01261	valS	valine--tRNA ligase	37601.3	26676.7	30715	23761	19623	13459
LGG_RS06065	LGG_01262	folC	bifunctional folylpolyglutamate synthase/dihydrofolate synthase	2493.33	2119.67	1773	2153	1426	1327
LGG_RS06070	LGG_01263	NO NAME	haloacid dehalogenase	893.667	738	560	640	631	533
LGG_RS06075	LGG_01264	radC	DNA repair protein RadC	1203.33	915.333	744	877	982	483
LGG_RS06080	LGG_01265	mreB	rod shape-determining protein Mbl	12785	12624	9338	12970	9994	12414
LGG_RS06085	LGG_01266	mreC	rod shape-determining protein MreC	5841.67	5806	4813	6118	4874	3397
LGG_RS06090	LGG_01267	mreD	cell shape-determining protein	3315.33	3202.67	2767	3394	2439	1664
LGG_RS06095	LGG_01268	minC	cell division inhibitor	2771.33	2817.33	2368	2920	2054	1610
LGG_RS06100	LGG_01269	minD	septum site-determining protein MinD	3257.67	3125.67	2942	3145	2447	1951
LGG_RS06105	LGG_01270	glnP	amino acid ABC transporter permease	335.667	474.667	165	193	291	143
LGG_RS06110	LGG_01271	glnQ	polar amino acid ABC transporter ATP-binding protein	427	538.333	218	165	285	154
LGG_RS06115	LGG_01272	glnH	amino acid ABC transporter substrate-binding protein	797.333	974.667	389	254	520	241
LGG_RS06120	LGG_01274	cls	cardiolipin synthase	571.667	547.333	372	544	553	474
LGG_RS06125	LGG_01276	NO NAME	hypothetical protein	651.333	568.667	428	551	739	1367
LGG_RS06130	LGG_01277	mraZ	cell division protein MraZ	3211.33	3127.67	2481	3130	1752	1955
LGG_RS06135	LGG_01278	mraW	16S rRNA (cytosine(1402)-N(4))-methyltransferase	7880	8692.33	5809	8413	3617	3730
LGG_RS06140	LGG_01279	ftsL	cell division protein FtsL	1881.67	2079.67	1432	2048	838	817
LGG_RS06145	LGG_01280	pbpb	penicillin-binding protein 2B	12734.3	11911.7	9984	11731	5684	4086
LGG_RS06150	LGG_01281	mraY	phospho-N-acetylmuramoyl-pentapeptide transferase	6831	6443.33	5334	6286	3646	3225
LGG_RS06155	LGG_01282	murD	UDP-N-acetylmuramoylalanine--D-glutamate ligase	16781.3	15341.3	13925	15576	8368	6710
LGG_RS06160	LGG_01283	murG	UDP-diphospho-muramoylpentapeptide beta-N- acetylglucosaminyltransferase	16505.3	13964.3	12879	13819	8680	5038
LGG_RS06165	LGG_01284	ftsQ	cell division protein FtsQ	8734.67	7528	7338	7269	4253	2008
LGG_RS06170	LGG_01285	ftsA	cell division protein FtsA	23079.7	22328.7	17974	21910	12552	10964
LGG_RS06175	LGG_01286	ftsZ	cell division protein FtsZ	32419.3	28453	24382	27563	15755	10757
LGG_RS06180	LGG_01287	sepF	cell division protein SepF	21648	18468.7	15784	17757	10357	5013
LGG_RS06185	LGG_01288	ylmG	cell division protein	4899.67	4174	3500	3595	2365	1499
LGG_RS06190	LGG_01289	ylmH	RNA-binding protein	17236	14553.3	12256	12892	8295	5362
LGG_RS06195	LGG_01290	divIVA	cell division protein DivIVA	22153	18255	16845	16651	12868	11970
LGG_RS06200	LGG_01291	ileS	isoleucyl-tRNA synthetase	74314.3	51728.3	57264	46462	41708	35208
LGG_RS06205	LGG_01292	cspA	cold-shock protein	4891.33	3295.33	3907	2862	3042	2793
LGG_RS06210	LGG_01293	pstS	phosphate ABC transporter substrate-binding protein	1094.33	583.667	388	475	295	432
LGG_RS06215	LGG_01294	ydiC	multidrug MFS transporter	430.667	386.667	366	362	542	790
LGG_RS06220	LGG_01295	telA	tellurite resistance protein TelA	8361.67	7993.67	6476	8080	5505	3568
LGG_RS06225	LGG_01296	NO NAME	MFS transporter	3433.33	3259.67	2601	3394	2108	1935
LGG_RS06230	LGG_01297	nudF	NUDIX hydrolase	1141	930.333	1007	1057	830	867
LGG_RS06235	LGG_01298	NO NAME	membrane protein	469.333	366	435	449	362	323
LGG_RS06240	LGG_01299	mtnN	5'-methylthioadenosine nucleosidase	3288.33	2133.67	2837	2453	2244	1865
LGG_RS06245	LGG_01300	iscS	cysteine desulfurase	6936	4231	6183	4770	4575	3746
LGG_RS06250	LGG_01302	NO NAME	cysteine desulfurase	3304.33	1938.33	2476	2068	2193	2614
LGG_RS06255	LGG_01303	uvrA	daunorubicin resistance protein DrrC	3020.67	2473.33	2351	2434	2797	2835
LGG_RS06260	LGG_01304	mnmA	tRNA (5-methylaminomethyl-2-thiouridylate)-methyltransferase	8273.33	7034.33	7369	7821	8160	9318
LGG_RS06265	LGG_01306	gpm	phosphoglycerate mutase	1369.67	1817.33	762	1524	1240	1371
LGG_RS06270	LGG_01307	NO NAME	hypothetical protein	1597	1931	878	1634	1480	1377
LGG_RS06275	LGG_01308	recD	hypothetical protein	6319.67	5271.67	3503	4425	6292	4245
LGG_RS06280	LGG_01309	NO NAME	GNAT family acetyltransferase	5770	4400.33	3009	3664	6296	4821
LGG_RS06285	LGG_01310	NO NAME	diacylglycerol kinase	1016.33	1084.67	737	1069	893	836
LGG_RS06290	LGG_01311	ykqC	ribonuclease J	21309.3	20002.3	18492	21648	20042	19084
LGG_RS06295	LGG_01312	NO NAME	hypothetical protein	1030.33	1077.67	784	1154	863	1368
LGG_RS06300	not predicted	NO NAME	hypothetical protein	1228	1456.33	1007	1654	1245	1702
LGG_RS06305	LGG_01313	NO NAME	hypothetical protein	581.667	672.333	357	632	583	715
LGG_RS06310	pseudo-gene	NO NAME	hypothetical protein	530.667	590.667	375	590	582	676
LGG_RS06315	LGG_01315	def	peptide deformylase	2379	2408.33	1848	2629	2720	4244
LGG_RS06320	LGG_01319	NO NAME	ATPase	4465.67	5126.67	3125	4822	3160	2928
LGG_RS06325	LGG_01320	pdhA	pyruvate dehydrogenase E1 subunit alpha	45931	23549.3	15440	32598	5066	7866
LGG_RS06330	LGG_01321	pdhB	2-oxoisovalerate dehydrogenase subunit beta	49207.7	25414.7	15621	36221	5966	7735
LGG_RS06335	LGG_01322	pdhC	dihydrolipoamide acetyltransferase	61943	36920.7	21286	55123	8983	9126
LGG_RS06340	LGG_01323	pdhD	dihydrolipoamide dehydrogenase	43942.7	32998.7	16863	49720	7966	9961
LGG_RS06345	LGG_01324	NO NAME	lactate dehydrogenase	3401.33	3672.67	1858	4414	2426	2263
LGG_RS06350	LGG_01325	yktA	hypothetical protein	1015.67	1094	618	1299	851	734
LGG_RS06355	LGG_01326	suhB	fructose 1%2C6-bisphosphatase	3329	3025.33	1986	3533	2761	3132
LGG_RS06360	LGG_01327	typA	GTP-binding protein	21330.7	20700	28042	20600	22709	15122
LGG_RS06365	LGG_01328	ftsW	cell division protein FtsW	1114.33	1087.33	949	1037	1540	1555
LGG_RS06370	LGG_01329	pyc	pyruvate carboxylase	16143.7	10602.3	12280	9791	12561	6531
LGG_RS06375	LGG_01330	NO NAME	hypothetical protein	1218.67	748	959	579	908	368
LGG_RS06380	LGG_01331	rsmD	rRNA methyltransferase	1917	1071.67	1370	826	1509	636
LGG_RS06385	LGG_01332	coaD	phosphopantetheine adenylyltransferase	1168	684.667	833	569	981	561
LGG_RS06390	LGG_01333	lon	peptidase S16	4693	2761.33	3384	2105	3662	2144
LGG_RS06395	LGG_01334	comEa	transporter	432.333	330	327	288	923	575
LGG_RS06400	LGG_01335	comEc	MBL fold hydrolase	1096.67	909.667	903	773	2118	1641
LGG_RS06405	LGG_01336	holA	DNA polymerase III subunit delta	1906.67	1664.33	1264	1636	1998	1990
LGG_RS06410	LGG_01337	rpsT	30S ribosomal protein S20	5612	5085.33	5030	5396	8692	13970
LGG_RS06415	LGG_01338	rpsO	30S ribosomal protein S15	6461.67	5704	5479	5971	6984	10589
LGG_RS06420	LGG_01339	NO NAME	hypothetical protein	665.667	693.667	470	570	1140	3256
LGG_RS06425	LGG_01340	ykqC	RNase J family beta-CASP ribonuclease	7152.67	8511	5976	9262	6480	9467
LGG_RS06430	LGG_01341	NO NAME	hypothetical protein	927	1579	874	1421	2321	3947
LGG_RS06435	LGG_01342	tuf	elongation factor Tu	169964	138477	158059	145313	151601	148925
LGG_RS06440	pseudo-gene	NO NAME	hydrogenase	308.667	279.333	205	259	397	281
LGG_RS06445	LGG_01347	NO NAME	NAD-dependent deacetylase	204.333	200.333	147	226	293	184
LGG_RS06450	LGG_01348	pcaC	carboxymuconolactone decarboxylase	74.3333	65.3333	48	57	122	63
LGG_RS06455	LGG_01349	merR	MerR family transcriptional regulator	40.6667	54	40	64	73	61
LGG_RS06460	LGG_01350	yknV	multidrug ABC transporter ATP-binding protein	379.667	466.667	247	557	407	355
LGG_RS06465	LGG_01351	tig	trigger factor	39859	34104.3	33681	33734	30390	19077
LGG_RS06470	LGG_01352	clpX	ATP-dependent Clp protease ATP-binding subunit ClpX	19971.3	15606	15776	15812	15768	16223
LGG_RS06475	LGG_01353	engB	GTP-binding protein	1369.67	1494.67	994	1406	1611	1930
LGG_RS06480	LGG_01354	NO NAME	nucleotide pyrophosphohydrolase	785	865.667	500	846	1050	1145
LGG_RS06485	LGG_01356	glnP	ABC transporter permease	3100	7845.33	2390	9860	456	672
LGG_RS06490	LGG_01357	glnQ	ABC transporter ATP-binding protein	2178.33	5952	1605	7299	312	559
LGG_RS06495	LGG_01358	uvrC	excinuclease ABC subunit C	2224.67	3503.67	1245	3457	1252	1296
LGG_RS06500	LGG_01359	fruA	PTS fructose transporter subunit IIC	23265.3	518	28114	586	28904	41556
LGG_RS06505	LGG_01360	fruB	1-phosphofructokinase	10969.7	279	15240	300	18924	22402
LGG_RS06510	LGG_01361	fruR	DeoR family transcriptional regulator	4663	157.333	6434	170	10865	15862
LGG_RS06515	LGG_01362	obg	GTPase CgtA	2519	3759	2356	3407	3360	3576
LGG_RS06520	LGG_01363	yvhB	acyltransferase	4609	6518	4472	6057	5445	5628
LGG_RS06525	LGG_01364	rnz/elaC	ribonuclease Z	4452.67	3498.67	3551	2849	4360	4338
LGG_RS06530	LGG_01365	dltE	short-chain dehydrogenase	3836.67	2839.67	2869	2290	3923	3514
LGG_RS06535	LGG_01366	NO NAME	membrane protein	1651.67	1311.33	1247	1081	1624	1652
LGG_RS06540	LGG_01367	clpB	chaperone protein ClpB	8330.67	6923.67	5850	6925	8708	10339
LGG_RS06545	LGG_01368	rpmF	50S ribosomal protein L32	4223.67	2685.67	3534	2968	5491	6372
LGG_RS06550	LGG_01369	NO NAME	hypothetical protein	422.333	577	333	637	671	928
LGG_RS06555	LGG_01370	ycjM	2'%2C 3'-cyclic nucleotide 2'-phosphodiesterase	3031	2998	2202	2952	2701	2972
LGG_RS06560	LGG_01371	NO NAME	hypothetical protein	2447.67	2010.67	1850	1940	2314	2464
LGG_RS06565	LGG_01372	NO NAME	hypothetical protein	1339.33	965.333	769	837	3473	5956
LGG_RS06570	LGG_01373	dnaE	DNA polymerase III subunit epsilon	11657	10490	7587	8393	14319	12004
LGG_RS06575	LGG_01374	pfkA	6-phosphofructokinase	26191.7	26742	24932	22633	27139	25121
LGG_RS06580	LGG_01375	pyk	pyruvate kinase	204870	152752	155978	125374	185241	194686
LGG_RS06585	LGG_01376	ytwI	membrane protein	622.667	620.667	635	613	876	617
LGG_RS06590	LGG_01377	cvfB	S1 RNA-binding protein	1420.67	1231.33	1209	1237	1670	1500
LGG_RS06595	LGG_01378	xerD	tyrosine recombinase XerD	1849.33	1527.67	1530	1558	2111	1497
LGG_RS06600	LGG_01379	ribT	GNAT family acetyltransferase	1250.67	1163	829	1148	1026	1125
LGG_RS06605	LGG_01380	scpA	segregation and condensation protein A	2124.33	2053.67	1531	2059	1966	1887
LGG_RS06610	LGG_01381	scpB	SMC-Scp complex subunit ScpB	1198	1170.33	979	1229	1132	1011
LGG_RS06615	LGG_01382	rluB	pseudouridine synthase	2588	2424.67	2078	2369	2402	1552
LGG_RS06620	LGG_01383	NO NAME	membrane protein	1144	2560.67	963	2738	2371	3164
LGG_RS06625	LGG_01384	fer	ferredoxin	669.333	675	494	606	1066	1511
LGG_RS06630	LGG_01385	NO NAME	hypothetical protein	2162	2033	1426	1818	2624	2578
LGG_RS06635	LGG_01386	recQ	ATP-dependent DNA helicase RecQ	3939	3286	2680	2856	4935	3392
LGG_RS06640	LGG_01387	NO NAME	peptidase M23	12230.3	11492	8651	11113	8171	7520
LGG_RS06645	LGG_01388	cmk	cytidylate kinase	11172.7	10039.3	7889	9605	7026	6853
LGG_RS06650	LGG_01389	rpsA	30S ribosomal protein S1	82101.3	63953.7	61668	62790	54059	44077
LGG_RS06655	LGG_01390	engA	ribosome-associated GTPase EngA	7560	5332.67	7058	5565	9597	11643
LGG_RS06660	LGG_01391	hup	transcriptional regulator	24217.3	23176.3	14114	23844	16236	50046
LGG_RS06665	LGG_01392	NO NAME	hypothetical protein	4696.67	4321	2851	4367	3814	3638
LGG_RS06670	LGG_01393	ypjC	membrane protein	3584.33	3362.67	2207	3310	3160	2493
LGG_RS06675	LGG_01394	cca	tRNA CCA-pyrophosphorylase	3039	2708.33	1919	2659	2801	2394
LGG_RS06680	LGG_01395	NO NAME	hypothetical protein	4836.67	3456.33	2133	4338	1961	2016
LGG_RS06685	LGG_01396	yfmR	ABC transporter ATP-binding protein	5306.67	4409.67	3815	4056	5493	3055
LGG_RS06690	LGG_01397	thyA	thymidylate synthase	3496.33	3114	2644	3173	3300	2059
LGG_RS06695	LGG_01398	folA	dihydrofolate reductase	1942	1755.33	1458	1826	1958	1400
LGG_RS06700	LGG_01399	hly	hemolysin III	203.333	332.667	178	359	176	214
LGG_RS06705	LGG_01400	DegV	hypothetical protein	3260.33	3643.33	2482	3682	2404	3674
LGG_RS06710	LGG_01401	NO NAME	lipase/acylhydrolase	1218.33	1418	1089	1474	750	895
LGG_RS06715	LGG_01402	NO NAME	hypothetical protein	1226.67	1275	1033	1367	655	772
LGG_RS06720	LGG_01403	msrA	methionine sulfoxide reductase A	1918.67	1795.33	1757	1876	1054	1009
LGG_RS06725	LGG_01404	NO NAME	hypothetical protein	560	442	503	519	367	316
LGG_RS06730	LGG_01405	ctpA	peptidase S41	4388.67	3089	4230	3472	2610	2078
LGG_RS06735	LGG_01406	NO NAME	hypothetical protein	125	160.333	97	160	191	166
LGG_RS06740	not predicted	NO NAME	hypothetical protein	257	319.667	142	287	278	263
LGG_RS06745	LGG_01407	NO NAME	hypothetical protein	1551.33	1695	1104	1561	1134	1133
LGG_RS06750	LGG_01408	rbgA	GTPase	3225.67	2830	2364	2855	2532	2045
LGG_RS06755	LGG_01409	rnhB	ribonuclease HII	2862.33	2331.33	2014	2338	2293	1728
LGG_RS06760	LGG_01410	dprA	DNA processing protein DprA	1005.33	911.667	673	879	1001	831
LGG_RS06765	LGG_01411	topA	DNA topoisomerase I	12870.3	9368	9128	9009	13785	7245
LGG_RS06770	LGG_01412	trmFO	tRNA (uracil-5-)-methyltransferase	1704.33	1457.67	1286	1612	1276	1132
LGG_RS06775	LGG_01413	xerC	tyrosine recombinase XerC	3534.67	3168.33	1796	3206	1726	2129
LGG_RS06780	LGG_01414	hslV	ATP-dependent protease subunit HslV	2743.67	2451	1370	2418	1182	1203
LGG_RS06785	LGG_01416	hslU	ATP-dependent protease	13120	11044.7	7259	11900	5073	4454
LGG_RS06790	LGG_01417	lacX	aldose 1-epimerase	7097	6023	4123	6558	2721	3249
LGG_RS06795	LGG_01418	yneS	membrane protein	1238.33	1228.67	963	1283	1205	1544
LGG_RS06800	LGG_01419	parE	DNA topoisomerase IV subunit B	9849.67	7373.33	8061	7833	7888	5280
LGG_RS06805	LGG_01420	parC	DNA topoisomerase IV subunit A	15734.7	11328	13718	10939	12887	7563
LGG_RS06810	LGG_01421	pflB	formate acetyltransferase	70766	11432	18324	16518	14498	9802
LGG_RS06815	LGG_01422	pflA	formate C-acetyltransferase	13427	4564	3465	5728	4222	2679
LGG_RS06820	LGG_01423	lysR	LysR family transcriptional regulator	11662	9786	7432	11186	4978	4892
LGG_RS06825	LGG_01424	ppaC	pyrophosphatase	30367	30094.3	22411	31445	17174	18482
LGG_RS06830	LGG_01425	xerC	tyrosine recombinase XerS	513.667	538.667	333	500	376	466
LGG_RS06835	LGG_01426	NO NAME	ABC transporter permease	1555.33	1312.67	1121	1282	1547	894
LGG_RS06840	LGG_01427	vraD	ABC transporter ATP-binding protein	984	847	648	779	777	522
LGG_RS06845	LGG_01428	graS	signal transduction histidine kinase	979.333	803.667	617	794	915	663
LGG_RS06850	LGG_01429	graR	two-component system response regulator	518	499.333	332	475	553	564
LGG_RS06855	LGG_01430	NO NAME	MFS transporter permease	895	803.333	588	836	728	815
LGG_RS06860	LGG_01431	NO NAME	GCN5 family N-acetyltransferase	1410.67	1082.33	851	1091	997	1126
LGG_RS06865	LGG_01432	NO NAME	acetyltransferase	2821.67	2351.33	1756	2392	1986	1971
LGG_RS06870	LGG_01433	NO NAME	nitroreductase	5919.33	5023	3483	4863	4802	6992
LGG_RS06875	LGG_01434	hpaG	fumarylacetoacetate hydrolase	2847	3237	1532	2742	1680	1343
LGG_RS06880	LGG_01435	hisC	histidinol-phosphate aminotransferase	424.667	458	215	268	404	299
LGG_RS06885	LGG_01436	hisE	phosphoribosyl-ATP pyrophosphatase	133	146	76	76	126	67
LGG_RS06890	LGG_01437	hisI	phosphoribosyl-AMP cyclohydrolase	121.667	132.667	70	57	109	58
LGG_RS06895	LGG_01438	hisF	imidazole glycerol phosphate synthase subunit HisF	204.667	192.667	113	122	212	246
LGG_RS06900	LGG_01439	hisA	1-(5-phosphoribosyl)-5-[(5-phosphoribosylamino)methylideneamino] imidazole-4-carboxamide isomerase	303.667	295.333	175	210	248	289
LGG_RS06905	LGG_01440	hisH	imidazole glycerol phosphate synthase subunit HisH	256.667	278	168	150	229	183
LGG_RS06910	LGG_01441	hisB	imidazoleglycerol-phosphate dehydratase	282	298.667	148	156	177	106
LGG_RS06915	LGG_01443	hisD	histidinol dehydrogenase	411.333	455.333	272	269	255	164
LGG_RS06920	LGG_01444	hisG	ATP phosphoribosyltransferase	201.333	230	141	116	99	44
LGG_RS06925	LGG_01445	hisZ	ATP phosphoribosyltransferase	198	278	144	157	122	93
LGG_RS06930	LGG_01446	hisC	histidinol-phosphate aminotransferase	862	1983.67	844	2193	252	248
LGG_RS06935	LGG_01447	nudF	NUDIX hydrolase	1192.33	942	1001	972	699	1027
LGG_RS06940	LGG_01448	degV	hypothetical protein	1704.67	1857.33	1324	1867	950	1595
LGG_RS06945	LGG_01449	NO NAME	hypothetical protein	762.333	896	680	952	698	676
LGG_RS06950	LGG_01450	fbp	hypothetical protein	1606	1299.33	1368	1404	1789	1088
LGG_RS06955	LGG_01451	NO NAME	pyrophosphatase	554.667	467.333	455	509	560	463
LGG_RS06960	LGG_01452	pfoS/R	membrane protein	210	204.667	184	185	217	206
LGG_RS06965	LGG_01453	pyrE	orotate phosphoribosyltransferase	2917.67	2112	1460	1570	3219	545
LGG_RS06970	LGG_01454	pyrF	orotidine 5'-phosphate decarboxylase	2701.33	1915.67	1341	1375	2842	451
LGG_RS06975	LGG_01455	purD	diguanylate cyclase	4815.33	3248.67	2533	2576	5020	676
LGG_RS06980	LGG_01456	carB	carbamoyl phosphate synthase large subunit	25545.7	17259.7	12640	13177	24442	3128
LGG_RS06985	LGG_01457	carA	carbamoyl phosphate synthase small subunit	6879.33	4457	3478	3548	7051	1009
LGG_RS06990	LGG_01458	pyrC	dihydroorotase	6905	4120.33	3743	3316	6873	946
LGG_RS06995	LGG_01459	pyrB	aspartate carbamoyltransferase	3839.67	2267.67	2107	1768	3352	496
LGG_RS07000	LGG_01460	uraA	uracil transporter	2845.67	1921.33	1645	1471	2468	535
LGG_RS07005	LGG_01461	pyrR	uracil phosphoribosyltransferase	1012	922	605	695	844	243
LGG_RS07010	LGG_01463	rluD	RNA pseudouridine synthase	2847	1661	1571	1673	1000	470
LGG_RS07015	LGG_01464	lspA	signal peptidase II	1439.67	926	666	887	397	225
LGG_RS07020	LGG_01465	fhs	formate--tetrahydrofolate ligase	75706.3	43386.7	18569	41535	6325	4509
LGG_RS07025	LGG_01466	NO NAME	hypothetical protein	928	584.333	307	656	328	393
LGG_RS07030	LGG_01467	rnhA	ribonuclease HI	220.667	215.333	123	187	426	489
LGG_RS07035	LGG_01468	NO NAME	nitroreductase	919	598	763	607	1560	1426
LGG_RS07040	LGG_01469	cls	cardiolipin synthase	1083.33	1128.67	842	1136	960	1079
LGG_RS07045	LGG_01471	NO NAME	hypothetical protein	1819.67	1912.33	1285	1814	1934	2589
LGG_RS07050	LGG_01472	NO NAME	transcriptional regulator	1087.33	1250	717	1105	897	936
LGG_RS07055	LGG_01473	nrdH	glutaredoxin	1364	1407.67	929	1459	1157	2154
LGG_RS07060	LGG_01474	nrdE	ribonucleotide-diphosphate reductase subunit alpha	12224.3	8084.67	10043	9197	9883	7931
LGG_RS07065	LGG_01475	nrdF	ribonucleoside-diphosphate reductase	7718.33	5049.67	6957	5611	5264	3971
LGG_RS07070	LGG_01476	hypR	LysR family transcriptional regulator	5387.67	4281	4394	4744	2179	3306
LGG_RS07075	LGG_01478	pepO	peptidase M13	31183.3	35526	22262	39076	8518	17298
LGG_RS07080	LGG_01479	lplA	lipoate-protein ligase A	9748.33	11799.3	4732	15545	1577	3948
LGG_RS07085	LGG_01480	NO NAME	hypothetical protein	3734.33	3868.33	2420	4101	2519	3963
LGG_RS07090	LGG_01481	serA	3-phosphoglycerate dehydrogenase	4123.33	4447.67	3681	4542	2823	3304
LGG_RS07095	LGG_01482	ypsC	RNA methyltransferase	4170.67	4465.67	3637	5017	2771	3182
LGG_RS07100	LGG_01484	gpsB	cell division protein GpsB	3770	3853.67	3097	3873	3430	8484
LGG_RS07105	LGG_01485	ypsA	hypothetical protein	1640.33	1710.33	1302	1755	1824	2322
LGG_RS07110	LGG_01486	recU	recombinase RecU	2544.33	2311	2020	2531	1901	1910
LGG_RS07115	LGG_01487	pbp1A	penicillin-binding protein 1A	11190.7	8568.67	9913	9850	8028	7105
LGG_RS07120	LGG_01488	comEB	hypothetical protein	2823.33	2624	2090	2461	3441	1944
LGG_RS07125	LGG_01489	nth	endonuclease III	4635.67	4322.33	3668	4115	4920	2376
LGG_RS07130	LGG_01490	dnaD	DNA replication protein DnaD	9843	8517.67	7412	8175	9257	4430
LGG_RS07135	LGG_01491	asnS	asparaginyl-tRNA synthase	27385	19308.3	19601	18355	24055	18176
LGG_RS07140	LGG_01492	aspB	aspartate aminotransferase	21459	15458.3	15418	14648	19799	15847
LGG_RS07145	LGG_01493	NO NAME	hypothetical protein	3786.33	3442.33	2714	3084	4245	3133
LGG_RS07150	LGG_01495	dinG	DNA helicase	7473.67	6874.33	5418	5748	10638	7128
LGG_RS07155	LGG_01496	rexA	ATP-dependent helicase	7568	5302.33	6538	5240	7835	3073
LGG_RS07160	LGG_01497	rexB	ATP-dependent helicase	5597.33	4220.67	4925	4679	5033	2991
LGG_RS07165	LGG_01498	mvaK	mevalonate kinase	2054.67	2083.33	1798	2119	2278	2198
LGG_RS07170	LGG_01499	mvaD	diphosphomevalonate decarboxylase	2805	2496	2386	2613	2782	2416
LGG_RS07175	LGG_01500	fni	isopentenyl pyrophosphate isomerase	2096.67	1526	1649	1505	2235	2094
LGG_RS07180	LGG_01501	Sun2	23S rRNA methyltransferase	2085	1889.67	1594	1724	2235	1472
LGG_RS07185	LGG_01502	NO NAME	membrane protein	1399	1552.33	1010	1375	1702	1193
LGG_RS07190	LGG_01504	NO NAME	SAM-dependent methyltransferase	1613.33	1952.33	1116	1772	1819	1575
LGG_RS07195	LGG_01505	yitW	DNA methyltransferase	1808.33	1995.33	1146	1766	2013	2674
LGG_RS07200	LGG_01506	nahJ	4-oxalocrotonate tautomerase	885	1016.67	550	903	862	983
LGG_RS07205	LGG_01507	NO NAME	ABC transporter ATP-binding protein	882.333	845.667	924	913	383	304
LGG_RS07210	LGG_01508	NO NAME	ABC transporter ATP-binding protein	916	1013.33	902	1048	456	504
LGG_RS07215	LGG_01509	NO NAME	Nif3-like dinuclear metal center hexameric protein	3307.67	3420	2490	3300	1861	2730
LGG_RS07220	LGG_01510	yqfN	SAM-dependent methyltransferase	2569	2870.33	2013	2794	1412	2240
LGG_RS07225	LGG_01511	rpoD	RNA polymerase sigma factor RpoD	13827	9104.33	10828	8225	14528	10791
LGG_RS07230	LGG_01512	dnaG	DNA primase	15231.3	11379.3	13487	10509	19552	14315
LGG_RS07235	LGG_01513	glyS	glycine-tRNA synthetase subunit beta	17822.7	10061.7	19576	9730	22182	13627
LGG_RS07240	LGG_01514	glyQ	glycyl-tRNA synthetase subunit alpha	6783.67	4826	8074	4861	9107	6816
LGG_RS07245	LGG_01515	NO NAME	integrase	3193	3556	2495	3207	3841	3247
LGG_RS07250	LGG_01516	NO NAME	hypothetical protein	625	804.667	474	737	695	664
LGG_RS07255	LGG_01518	NO NAME	hypothetical protein	1160.33	1287	743	1184	2658	3557
LGG_RS07260	LGG_01519	NO NAME	endolysin	171.667	180.667	113	154	530	487
LGG_RS07265	LGG_01520	NO NAME	primase	23.6667	22.3333	14	15	83	86
LGG_RS07270	LGG_01521	NO NAME	primase	16	24.3333	11	12	71	41
LGG_RS07275	LGG_01522	NO NAME	phage infection protein	4.33333	4.66667	0	4	10	17
LGG_RS07280	LGG_01523	NO NAME	phage tail protein	173	219	77	193	374	450
LGG_RS07285	LGG_01524	NO NAME	tail protein	151.333	185.667	89	186	219	265
LGG_RS07290	LGG_01525	NO NAME	tail protein	64.6667	93	39	80	128	200
LGG_RS07295	not predicted	NO NAME	hypothetical protein	3.66667	3.66667	1	2	5	8
LGG_RS07300	LGG_01527	NO NAME	tail protein	4	6	2	4	5	9
LGG_RS07305	LGG_01528	NO NAME	tail protein	36.6667	38.3333	23	21	65	64
LGG_RS07310	LGG_01529	NO NAME	tail protein	25.6667	23	18	16	39	45
LGG_RS07315	LGG_01530	NO NAME	head-tail connector protein	40.3333	28.6667	20	28	46	57
LGG_RS07320	not predicted	NO NAME	head-tail joining protein	32.6667	30	18	27	53	37
LGG_RS07325	LGG_01532	NO NAME	hypothetical protein	14.3333	16.3333	11	12	23	24
LGG_RS07330	LGG_01533	NO NAME	phage capsid protein	211.333	193.333	142	151	241	294
LGG_RS07335	LGG_01534	NO NAME	portal protein	27.3333	33.3333	16	26	72	92
LGG_RS07340	not predicted	NO NAME	hypothetical protein	2.33333	3	4	6	5	15
LGG_RS07345	LGG_01535	NO NAME	terminase	37.3333	50.3333	21	58	90	98
LGG_RS07350	LGG_01536	NO NAME	terminase	6.33333	5	3	6	11	15
LGG_RS07355	LGG_01537	tnpR	resolvase	83.3333	79.6667	59	87	50	47
LGG_RS07360	LGG_01538	NO NAME	glycosyl transferase family 2	21.3333	21	10	29	35	57
LGG_RS07365	LGG_01539	is40	transposase	0.666667	0.333333	0	0	2	1
LGG_RS07370	not predicted	NO NAME	hypothetical protein	15	16.6667	7	17	10	15
LGG_RS07375	not predicted	NO NAME	hypothetical protein	14	20	13	16	14	11
LGG_RS07380	LGG_01540	NO NAME	DNA primase	23	32.3333	13	24	14	23
LGG_RS07385	LGG_01541	ssb4	single-stranded DNA-binding protein	8.33333	10.6667	3	10	10	5
LGG_RS07390	LGG_01542	NO NAME	hypothetical protein	20.3333	24	19	31	23	25
LGG_RS07395	LGG_01543	NO NAME	hypothetical protein	12.6667	17.3333	4	12	10	13
LGG_RS07405	LGG_01544	NO NAME	hypothetical protein	1271.33	1518	1011	1640	1006	1482
LGG_RS07410	not predicted	NO NAME	hypothetical protein	191.333	251	160	256	144	254
LGG_RS07415	LGG_01545	rimL	GNAT family acetyltransferase	373.333	358	230	378	173	142
LGG_RS07420	LGG_01546	NO NAME	hypothetical protein	453	437.667	292	471	236	213
LGG_RS07425	LGG_01547	NO NAME	ABC transporter ATP-binding protein	456.333	458.667	331	507	154	139
LGG_RS07430	LGG_01548	NO NAME	hypothetical protein	859.333	384.667	425	375	174	120
LGG_RS07435	LGG_01549	recO	DNA repair protein RecO	826	722.333	648	629	504	414
LGG_RS07440	LGG_01550	era	GTPase Era	2699	2366.33	1960	2185	2160	1846
LGG_RS07445	LGG_01551	cdd	cytidine deaminase	941.667	792.667	632	808	748	758
LGG_RS07450	LGG_01552	dgkA	diacylglycerol kinase	907	808	625	754	764	708
LGG_RS07455	LGG_01553	NO NAME	rRNA maturation RNase YbeY	874.333	748	585	699	738	725
LGG_RS07460	LGG_01554	phoH	phosphate starvation protein PhoH	3922	3787.67	2740	3478	2983	3118
LGG_RS07465	LGG_01555	yqeY	hypothetical protein	15822.7	11198.7	11162	10938	14540	26956
LGG_RS07470	LGG_01556	rpsU	30S ribosomal protein S21	4264.33	3049.67	2840	3007	3851	8317
LGG_RS07475	LGG_01557	yqfL	hypothetical protein	1830	1686.33	943	1592	722	1038
LGG_RS07480	LGG_01558	nfo	endonuclease IV	2528.67	2606.67	1745	2101	1410	1414
LGG_RS07485	LGG_01559	yitT	membrane protein	1747.67	2001.67	1108	1706	996	1475
LGG_RS07490	LGG_01560	msrB	methionine sulfoxide reductase B	1157	1368.67	802	1175	378	1084
LGG_RS07495	LGG_01561	aspS	aspartyl-tRNA synthetase	18263.7	12537	38823	43901	22269	16365
LGG_RS07500	LGG_01562	hisS	histidyl-tRNA synthetase	9427	6373	19129	22599	11253	7663
LGG_RS07505	LGG_01563	NO NAME	ABC transporter permease	821.667	1867.33	690	2253	470	1297
LGG_RS07510	LGG_01564	mppX	ABC transporter ATP-binding protein	378.333	980.333	381	1264	181	582
LGG_RS07515	LGG_01565	NO NAME	DeoR family transcriptional regulator	359.667	526	267	574	283	648
LGG_RS07520	LGG_01566	ami	N-acetylmuramoyl-L-alanine amidase	1765.67	2192.67	1472	2249	1455	2075
LGG_RS07525	LGG_01567	NO NAME	haloacid dehalogenase	1446	1402.67	1201	1414	1389	1574
LGG_RS07530	LGG_01568	dtd	D-tyrosyl-tRNA(Tyr) deacylase	1389.67	1486	1119	1421	1365	1263
LGG_RS07535	LGG_01569	relA	GTP pyrophosphokinase	19355	19901	14353	18949	14521	12845
LGG_RS07540	LGG_01570	NO NAME	membrane protein	1144.67	793.667	854	774	1011	965
LGG_RS07545	LGG_01571	nadD	16S rRNA methyltransferase	1874	1246.67	1423	1216	1829	1300
LGG_RS07550	LGG_01572	prmA	50S ribosomal protein L11 methyltransferase	1990	1460.33	1454	1476	1975	1607
LGG_RS07555	LGG_01573	NO NAME	hypothetical protein	823.667	740.667	589	679	955	865
LGG_RS07560	LGG_01574	mpg	3-methyladenine DNA glycosylase	731	695.333	557	678	923	1014
LGG_RS07565	LGG_01575	NO NAME	hypothetical protein	623.667	522	487	560	695	710
LGG_RS07570	LGG_01576	NO NAME	membrane protein	300	265.667	323	311	311	432
LGG_RS07575	LGG_01577	NO NAME	hypothetical protein	359.333	278.667	249	321	247	438
LGG_RS07580	LGG_01578	NO NAME	hypothetical protein	1289.33	1053.33	962	1213	916	1141
LGG_RS07585	LGG_02998	tRNA-Ser	tRNA-Ser	39.3333	23.6667	34	40	14	129
LGG_RS07590	LGG_01579	NO NAME	NAD(P)H dehydrogenase	366.333	247.667	318	236	216	244
LGG_RS07595	LGG_01580	NO NAME	TetR family transcriptional regulator	373.667	242.333	259	229	208	183
LGG_RS07600	LGG_01581	is41	transposase	1.33333	0.333333	0	0	0	2
LGG_RS07605	LGG_01582	NO NAME	oxidoreductase	53	74.3333	38	88	79	87
LGG_RS07610	LGG_01583	NO NAME	hypothetical protein	34	28	13	22	53	40
LGG_RS07615	LGG_01584	is42	transposase	0	0	0	0	0	0
LGG_RS07620	LGG_01585	is43	transposase	0	0	0	0	0	0
LGG_RS07625	LGG_01586	yohH	glycosyl transferase family 1	352.333	263	198	249	465	356
LGG_RS07630	LGG_01587	yohJ	glycosyl transferase family 1	278.667	225.333	153	208	444	324
LGG_RS07635	LGG_01588	NO NAME	hypothetical protein	118.333	125.667	61	104	335	221
LGG_RS07640	LGG_01589	NO NAME	cell surface protein	118	103	69	79	323	160
LGG_RS07645	LGG_01590	NO NAME	hypothetical protein	26.3333	21.6667	15	15	34	42
LGG_RS07650	LGG_01591	NO NAME	membrane protein	342	284.667	221	241	466	433
LGG_RS07655	LGG_01592	NO NAME	peptidase	222.667	169.333	197	204	292	277
LGG_RS07660	LGG_01593	NO NAME	hypothetical protein	352	530	227	496	458	704
LGG_RS07665	LGG_01594	hutG	N-formylglutamate amidohydrolase	406	525.667	293	548	363	591
LGG_RS07670	LGG_01595	folE	GTP cyclohydrolase	3506.33	3124.67	2209	3080	2824	4131
LGG_RS07675	LGG_01596	ebsC	aminoacyl-tRNA deacylase	4608	4077	3036	3961	3788	5543
LGG_RS07680	LGG_01597	apt	adenine phosphoribosyltransferase	4376.67	3889.67	3027	3664	3156	4095
LGG_RS07685	LGG_01598	recJ	single-stranded DNA-binding protein	7978.67	6772	4808	6401	5835	7248
LGG_RS07690	LGG_01599	NO NAME	hypothetical protein	13815.7	15223.3	8653	14371	7132	14541
LGG_RS07695	LGG_01600	NO NAME	RNA-binding protein	1669	1681.33	973	1448	1408	3674
LGG_RS07700	LGG_01601	NO NAME	hypothetical protein	1338	1400	736	1249	1079	2482
LGG_RS07705	LGG_01602	lepA	elongation factor 4	4993.67	4847.67	3797	4824	4173	4167
LGG_RS07710	LGG_01603	dnaJ	molecular chaperone DnaJ	29088	21347.3	19435	20431	11394	11118
LGG_RS07715	LGG_01604	dnaK	molecular chaperone DnaK	142329	113338	100399	108029	47226	40465
LGG_RS07720	LGG_01605	grpE	co-chaperone GrpE	26605.7	27515	19773	25261	10541	10432
LGG_RS07725	LGG_01606	hrcA	HrcA family transcriptional regulator	26600.3	30982.7	18622	27655	12526	16087
LGG_RS07730	LGG_01607	hemN	coproporphyrinogen III oxidase	6314.33	4942.33	4293	4214	5423	3273
LGG_RS07735	LGG_01608	ribF	riboflavin biosynthesis protein RibF	3942.33	3187.67	2913	2946	2656	1858
LGG_RS07740	LGG_01609	truB	tRNA pseudouridine synthase B	5655.67	4874	4389	4566	3266	2325
LGG_RS07745	LGG_01610	terC	membrane protein	2195.67	2360.33	1722	2200	1539	1651
LGG_RS07750	LGG_01611	rbfA	ribosome-binding factor A	4825.33	4508.33	4643	3726	5715	3136
LGG_RS07755	LGG_01612	infB	translation initiation factor IF-2	48717.3	47604.3	48291	41982	54709	22290
LGG_RS07760	LGG_01613	ylxQ	50S ribosomal protein L7ae	3342.33	3507.67	3087	3070	3404	1309
LGG_RS07765	LGG_01614	nusA	DNA-binding protein	3308	3621.33	3310	3106	3960	1756
LGG_RS07770	LGG_01615	nusA	transcription termination factor NusA	14659.7	16503	13962	14738	15835	7987
LGG_RS07775	LGG_01616	yhbC	ribosome maturation protein RimP	5717.33	7320.67	5297	6801	5732	2814
LGG_RS07780	LGG_01617	polC	DNA polymerase III subunit alpha	16723	16372.7	13591	15471	15098	9851
LGG_RS07785	LGG_01618	proS	prolyl-tRNA synthetase	11177.3	9105.33	9905	9457	9026	5968
LGG_RS07790	LGG_01619	eep	metalloprotease RseP	5496	4745.33	4759	5028	4393	2842
LGG_RS07795	LGG_01620	cdsA	CDP-diglyceride synthetase	3470.33	3167.67	2962	3365	2928	2035
LGG_RS07800	LGG_01621	uppS	UDP pyrophosphate synthase	1654.33	1797.33	1240	1823	1963	1781
LGG_RS07805	LGG_01622	is44	transposase	0	0	0	0	0	0
LGG_RS07810	LGG_01623	is45	integrase	344.333	281	223	214	524	755
LGG_RS07815	LGG_01624	frr	ribosome recycling factor	11452.3	9831.33	7146	8456	17024	13737
LGG_RS07820	LGG_01625	pyrH	uridylate kinase	13375.3	11436	8356	10301	21763	17813
LGG_RS07825	LGG_01627	tsf	elongation factor Ts	15770.7	12616.3	15362	12086	27284	22076
LGG_RS07830	LGG_01628	rpsB	30S ribosomal protein S2	25311.7	20323.3	26298	19531	36159	30124
LGG_RS07835	LGG_01629	yazA	hypothetical protein	410	401.667	330	381	406	551
LGG_RS07840	LGG_01630	yabB	O-methyltransferase	1324.67	1376	1147	1394	1476	1716
LGG_RS07845	LGG_01631	plsC	1-acyl-sn-glycerol-3-phosphate acyltransferase	1782	1923.67	1364	2041	926	1122
LGG_RS07850	LGG_01632	yhdG	amino acid permease	1616.67	2005	1531	2212	1035	1545
LGG_RS07855	LGG_01633	yejC	cyclic nucleotide-binding protein	1355.33	1699	1242	1819	988	1202
LGG_RS07860	LGG_01634	mdlB	ABC transporter ATP-binding protein	2902.67	3133.33	2486	2970	1614	2293
LGG_RS07865	LGG_01635	mdlA	multidrug ABC transporter ATP-binding protein	2401.67	2643	1949	2584	1350	1720
LGG_RS07870	LGG_01636	NO NAME	hypothetical protein	3450.67	3120.33	3009	2942	3534	3558
LGG_RS07875	LGG_01637	ynzC	hypothetical protein	1748	1858.33	1539	1826	2548	1859
LGG_RS07880	LGG_01639	rplS	50S ribosomal protein L19	16573	12771.3	14785	12652	17965	21635
LGG_RS07885	LGG_01640	trmD	tRNA (guanine(37)-N(1))-methyltransferase	1945	2006.33	2041	2051	2634	2134
LGG_RS07890	LGG_01641	rimM	16S rRNA-processing protein RimM	1348	1443	1307	1364	1874	1507
LGG_RS07895	LGG_01642	ylqC	RNA-binding protein	3503.67	2732	3640	2569	5422	4767
LGG_RS07900	LGG_01643	rpsP	30S ribosomal protein S16	2593.67	2102	2413	2101	4053	3166
LGG_RS07905	LGG_01644	ffh	signal recognition particle protein	4320.33	3000.67	3401	3023	4613	3966
LGG_RS07910	LGG_01645	ylxM	DNA-binding protein	842.667	754	632	771	867	729
LGG_RS07915	LGG_01647	NO NAME	hypothetical protein	72.3333	64	36	45	41	69
LGG_RS07920	LGG_01648	NO NAME	membrane protein	3301	2305.67	1969	2321	2725	7306
LGG_RS07925	LGG_01649	ftsY	signal recognition particle-docking protein FtsY	7563	5961	5178	4364	6238	4240
LGG_RS07930	LGG_01650	smc	chromosome segregation protein SMC	20255.3	16327.3	13061	13051	20195	11405
LGG_RS07935	LGG_01651	rnc	ribonuclease III	3994.67	3892	2480	3258	4442	2996
LGG_RS07940	LGG_01652	oppA	peptide ABC transporter substrate-binding protein	76414	79612.7	65447	86008	20776	45323
LGG_RS07945	LGG_01653	oppC	peptide ABC transporter permease	5722.33	5477	5862	5741	2253	1631
LGG_RS07950	LGG_01654	oppB	peptide ABC transporter permease	9612	9287	9105	9549	3424	2312
LGG_RS07955	LGG_01655	oppF	peptide ABC transporter substrate-binding protein	10672	10730.7	9134	10994	3511	2611
LGG_RS07960	LGG_01656	oppD	dipeptide/oligopeptide/nickel ABC transporter ATP-binding protein	7939.33	9437	6549	9770	2957	3107
LGG_RS07965	LGG_01658	acpP	acyl carrier protein	1482.67	993.333	1159	1030	1310	1716
LGG_RS07970	LGG_01659	plsX	phosphate acyltransferase	4724.67	3701.33	4179	3657	4392	3681
LGG_RS07975	LGG_01660	recG	ATP-dependent DNA helicase RecG	7519.33	6447	6569	6270	7716	6994
LGG_RS07980	LGG_01661	prfC	hypothetical protein	8761	8652.67	6424	8879	8378	9750
LGG_RS07985	LGG_01662	asp	hypothetical protein	1198.33	1469.67	783	1505	1283	1680
LGG_RS07990	LGG_01663	rpmB	50S ribosomal protein L28	4349.67	3079.67	3344	3066	5727	9168
LGG_RS07995	LGG_01664	thiN	thiamine pyrophosphokinase	4985	3847	3464	3605	4593	4245
LGG_RS08000	LGG_01665	rpe	ribulose-phosphate 3-epimerase	3519.33	2879.33	2415	2729	3032	2726
LGG_RS08005	LGG_01666	rsgA	ribosome biogenesis GTPase RsgA	4885	3674.33	3356	3507	4053	3194
LGG_RS08010	LGG_01667	stkP	protein kinase	10454	7363.67	6908	6830	10701	6025
LGG_RS08015	LGG_01668	pppL	protein phosphatase	4375.33	3108.33	2720	2717	4063	2717
LGG_RS08020	LGG_01669	sun	16S rRNA methyltransferase	8191.67	5618.67	5706	5041	7369	4359
LGG_RS08025	LGG_01670	fmt	methionyl-tRNA formyltransferase	5905.33	4190.67	4004	3884	5223	3283
LGG_RS08030	LGG_01671	priA	primosomal protein N'	9752.33	6927	6847	6616	8295	5078
LGG_RS08035	LGG_01672	coaBC	DNA/pantothenate metabolism flavoprotein	3736.67	2964.33	2903	3093	2996	2255
LGG_RS08040	LGG_01673	rpoZ	DNA-directed RNA polymerase subunit omega	2596.33	2034.67	2004	2089	1428	1851
LGG_RS08045	LGG_01674	gmk	guanylate kinase	2552	2374.67	1761	2535	1405	1929
LGG_RS08050	LGG_01675	NO NAME	alpha/beta hydrolase	271.667	262	195	244	250	286
LGG_RS08055	LGG_01676	NO NAME	hypothetical protein	234.667	234.333	147	203	258	179
LGG_RS08060	LGG_01677	recN	DNA repair protein RecN	6798.67	5922.67	5083	5255	6497	4169
LGG_RS08065	LGG_01678	argR	arginine repressor	2437.67	2194.67	1975	1849	2455	1304
LGG_RS08070	LGG_01679	tlyA	cell division protein FtsJ	4277.33	3175.33	3457	2717	3873	2529
LGG_RS08075	LGG_01680	ispA	farnesyl-diphosphate synthase	4081.67	2862	3184	2631	3509	2415
LGG_RS08080	LGG_01681	xseB	exodeoxyribonuclease VII small subunit	1975	1321.67	1659	1366	1576	675
LGG_RS08085	LGG_01682	xseA	exodeoxyribonuclease VII large subunit	5282	3625.33	4077	3537	4974	2991
LGG_RS08090	LGG_01683	folD	tetrahydrofolate dehydrogenase	2011	1545.67	1519	1556	2485	1805
LGG_RS08095	LGG_01684	nusB	transcription antitermination protein NusB	3005.67	2330.67	2434	2268	2762	2620
LGG_RS08100	LGG_01685	asp	alkaline shock protein	4882.67	4194.67	4048	4153	4748	4504
LGG_RS08105	LGG_01686	efp	elongation factor P	5690.67	4677.67	4972	4929	4742	5008
LGG_RS08110	LGG_01687	pepQ	peptidase M24	6181.33	3962.67	7143	4076	4437	4065
LGG_RS08115	LGG_01688	rpmA	50S ribosomal protein L27	5492.67	4422	5346	4340	5173	7146
LGG_RS08120	LGG_01689	ysxB	hypothetical protein	8343.67	7219.33	9429	7346	7889	8042
LGG_RS08125	LGG_01690	rplU	50S ribosomal protein L21	10094.7	9627.33	10526	9262	9889	10242
LGG_RS08130	LGG_01691	NO NAME	hypothetical protein	120.333	101.333	89	100	105	157
LGG_RS08135	LGG_01693	NO NAME	hypothetical protein	1664.67	1281.33	1126	1645	986	1166
LGG_RS08140	LGG_02978	tRNA-Arg	tRNA-Arg	194.667	148.667	138	213	99	105
LGG_RS08145	LGG_01694	NO NAME	ABC transporter permease	1784.33	1978.67	1650	1794	617	670
LGG_RS08150	LGG_01695	pepX	x-prolyl-dipeptidyl aminopeptidase	3983.67	4008.67	3537	3833	1322	1394
LGG_RS08155	LGG_01696	glnA	glutamine synthetase	27777	73963	9074	40850	22732	97329
LGG_RS08160	LGG_01697	glnR	MerR family transcriptional regulator	7117.33	18897	2235	10327	7065	25100
LGG_RS08165	LGG_01698	speF	ornithine decarboxylase	2977	2897.33	2257	2837	3624	4367
LGG_RS08170	LGG_01699	ynbB	aluminum resistance protein	11097.3	9248.33	10006	8313	7744	6405
LGG_RS08175	LGG_01700	miaA	tRNA dimethylallyltransferase	4234	3745.33	3728	3597	2981	3175
LGG_RS08180	LGG_01701	NO NAME	hypothetical protein	1353.33	1281	1029	1392	992	1896
LGG_RS08185	LGG_01702	yqhL	sulfurtransferase	2664.67	2326.67	2399	2562	1979	2024
LGG_RS08190	LGG_01703	gki	glucokinase	4629.33	4263.33	4056	4525	3388	4047
LGG_RS08195	LGG_01704	NO NAME	hypothetical protein	666.667	731.667	575	743	604	529
LGG_RS08200	LGG_01705	NO NAME	membrane protein	1211.33	1410.33	1059	1408	1119	1601
LGG_RS08205	LGG_01706	pbp2B	cell division protein FtsI	2742	2712	2134	2716	2909	3003
LGG_RS08210	LGG_01707	NO NAME	hypothetical protein	0	0	0	0	0	0
LGG_RS08215	LGG_01708	NO NAME	membrane protein	2459.33	2566.33	2157	3062	2509	3144
LGG_RS08220	LGG_01709	yneR	iron-sulfur cluster biosynthesis protein	718.333	681	476	723	644	677
LGG_RS08225	LGG_01710	vraR	LuxR family transcriptional regulator	1089.67	1237.67	772	1254	875	1341
LGG_RS08230	LGG_01711	vraS	two-component system sensor histidine kinase	633	773.667	451	724	656	969
LGG_RS08235	LGG_01712	NO NAME	membrane protein	550.333	508.667	396	500	507	611
LGG_RS08240	LGG_01713	greA	transcription elongation factor GreA	6952	5097.67	5624	4606	6082	4925
LGG_RS08245	LGG_01714	udk	uridine/cytidine kinase	8328.67	5860.33	6858	5554	5947	4639
LGG_RS08250	LGG_01715	yrrL	aminodeoxychorismate lyase	19037.3	12778	15650	12469	12512	10275
LGG_RS08255	LGG_01717	pheT	phenylalanine--tRNA ligase subunit beta	48421	31218.3	39206	31615	24683	34906
LGG_RS08260	LGG_01718	pheS	phenylalanine--tRNA ligase subunit alpha	10216	8064	8161	8450	6420	11891
LGG_RS08265	LGG_01719	yodB	HxlR family transcriptional regulator	593	502	353	471	529	1031
LGG_RS08270	LGG_01720	spyM	hydrolase	9907.67	9843.67	6823	9441	5417	11422
LGG_RS08275	LGG_01721	spoU	23S rRNA methyltransferase	2919.67	2197	2236	2102	2220	3027
LGG_RS08280	LGG_01723	acyP	acylphosphatase	3004	2488	2107	2371	2636	3583
LGG_RS08285	LGG_01724	oxaA	protein translocase component YidC	11156.7	7945.67	8649	7640	9159	10151
LGG_RS08290	LGG_01725	hpk2	two-component system sensor histidine kinase	5082.67	4590.67	4562	4774	4681	6328
LGG_RS08295	LGG_01726	rr2	two-component system response regulator	3244.33	3458.33	2786	3521	3061	5256
LGG_RS08300	LGG_01727	gnd	6-phosphogluconate dehydrogenase	34401.7	26856	22252	25999	22374	35718
LGG_RS08305	LGG_01728	NO NAME	peptidase M23	1686	1513.33	865	1253	2113	1763
LGG_RS08310	LGG_01729	is46	transposase	3167.33	2850.67	1779	2332	3970	4063
LGG_RS08315	not predicted	NO NAME	hypothetical protein	692	696.667	462	590	533	304
LGG_RS08320	LGG_01731	NO NAME	nucleic acid-binding protein	4502	4023.67	2797	3337	3892	4245
LGG_RS08325	LGG_01732	NO NAME	hypothetical protein	6870.67	5629.67	4473	4684	5472	4234
LGG_RS08330	LGG_01733	yqeM	SAM-dependent methyltransferase	6570.33	5519	3933	4637	4695	3817
LGG_RS08335	LGG_01734	yqeL	ribosome silencing factor RsfS	3446.33	3211.67	2018	2835	2262	1795
LGG_RS08340	LGG_01735	yqeK	hypothetical protein	4551.33	4131.33	2887	3682	3134	2904
LGG_RS08345	LGG_01736	nadD	nicotinic acid mononucleotide adenylyltransferase	4730.33	4688.33	3177	4306	3164	2188
LGG_RS08350	LGG_01737	yqeI	RNA-binding protein	2139	2185	1416	1994	1352	1137
LGG_RS08355	LGG_01738	yqeH	GTPase	4790.67	4506	3171	4268	3511	3078
LGG_RS08360	LGG_01739	yqeG	haloacid dehalogenase	1675	1401.67	1034	1303	1168	968
LGG_RS08365	LGG_01740	ykcA	glyoxalase	1086.67	941	423	1067	462	1185
LGG_RS08370	LGG_01741	yaiA	glyoxalase	2065.67	1922	827	2334	899	1646
LGG_RS08375	LGG_01742	yahD	esterase	1683.33	1545.67	708	1881	726	1282
LGG_RS08380	LGG_01743	NO NAME	NADPH:quinone reductase	1884	1690.67	893	2007	999	1749
LGG_RS08385	LGG_01744	yvdD	lysine decarboxylase	1744	1551.67	826	1678	1508	2143
LGG_RS08390	LGG_01745	rplT	50S ribosomal protein L20	5386	4419	6303	4522	5935	7091
LGG_RS08395	LGG_01746	rpmI	50S ribosomal protein L35	4220.67	3650.67	5438	3941	4839	4246
LGG_RS08400	LGG_01747	infC	translation initiation factor IF-3	7681.33	7098	8490	7123	8552	12506
LGG_RS08405	LGG_01748	NO NAME	Rrf2 family transcriptional regulator	1774	2059.33	1103	1829	2362	1962
LGG_RS08410	LGG_01749	is47	transposase	0.333333	1.33333	1	0	2	2
LGG_RS08415	LGG_01750	NO NAME	transporter	60	63.3333	43	73	99	129
LGG_RS08420	LGG_01751	sir2	NAD-dependent deacetylase	12.3333	21.3333	8	22	16	13
LGG_RS08425	LGG_01752	NO NAME	hypothetical protein	654	621	619	585	700	2163
LGG_RS08430	LGG_01753	NO NAME	hypothetical protein	227.333	250	231	208	232	879
LGG_RS08435	LGG_01754	thrS	threonyl-tRNA synthetase	75475.7	55172.7	61692	52184	64921	54596
LGG_RS08440	LGG_01755	NO NAME	hypothetical protein	1196	1509.33	645	1200	2300	1866
LGG_RS08445	LGG_01756	dnaI	primosomal protein DnaI	1435.67	1391.33	939	1188	2012	1250
LGG_RS08450	LGG_01757	NO NAME	replication initiation protein	2375	2336.33	1534	2028	2724	1875
LGG_RS08455	LGG_01758	nrdR	NrdR family transcriptional regulator	2717	2163.67	1649	2075	2564	2937
LGG_RS08460	LGG_01759	coaE	dephospho-CoA kinase	2170.33	1538	1374	1544	2044	1959
LGG_RS08465	LGG_01760	mutM	5-hydroxymethyluracil DNA glycosylase	4935.67	3589	3285	3583	4288	4176
LGG_RS08470	LGG_01761	polA	DNA polymerase I	19333.3	16920	13940	17543	16759	15780
LGG_RS08475	LGG_01762	NO NAME	membrane protein	2120	1952.67	1484	2140	2171	3543
LGG_RS08480	not predicted	NO NAME	hypothetical protein	10.6667	11.3333	6	10	40	41
LGG_RS08485	LGG_01763	yqbJ	cell surface protein	85	94.3333	54	79	150	153
LGG_RS08490	LGG_01764	NO NAME	hypothetical protein	20.3333	22.6667	17	25	33	58
LGG_RS08495	LGG_01765	NO NAME	cell surface protein	49.6667	66.6667	33	51	79	94
LGG_RS08500	LGG_01766	NO NAME	cell surface protein	107	178.333	79	158	236	342
LGG_RS08505	LGG_01767	NO NAME	transcriptional regulator	178.667	115.667	97	100	93	63
LGG_RS08510	LGG_01768	murC	UDP-N-acetylmuramate--alanine ligase	13705	6725.33	7630	4854	8281	4711
LGG_RS08515	LGG_01769	ftsK	cell division protein FtsK	20859.7	11347.7	12081	8840	13369	7902
LGG_RS08520	LGG_01770	NO NAME	hypothetical protein	154	164.667	72	156	204	381
LGG_RS08525	LGG_01771	pheT	tRNA-binding protein	2676.33	2875.67	1713	2819	4055	7707
LGG_RS08530	LGG_01772	trxA	thioredoxin	935.333	1055	600	1095	1586	2740
LGG_RS08535	LGG_01773	NO NAME	hypothetical protein	446.667	423	270	406	1325	1239
LGG_RS08540	LGG_01774	trmB	tRNA (guanine-N(7)-)-methyltransferase	985.333	980.333	726	1006	3500	2613
LGG_RS08545	LGG_01775	ytmP	aminoglycoside phosphotransferase	2355	2239.33	1824	2509	6615	8674
LGG_RS08550	LGG_01776	NO NAME	ABC transporter permease	1053.67	834.667	1003	915	881	870
LGG_RS08555	LGG_01777	ecsA	multidrug ABC transporter ATP-binding protein	710.667	691.333	620	790	597	566
LGG_RS08560	LGG_01778	hit	histidine triad protein	1116.67	1011	892	1063	1306	1290
LGG_RS08565	LGG_01779	NO NAME	hypothetical protein	2096.33	1689	1692	1758	2340	1706
LGG_RS08570	LGG_01780	prsA	peptidylprolyl isomerase	18700	14724	15751	16246	13056	9969
LGG_RS08575	LGG_01781	cbf	3'-5' exoribonuclease	2217	2011.33	1373	1939	2099	2903
LGG_RS08580	LGG_01782	NO NAME	hypothetical protein	6279.67	4568.33	4174	4509	5012	6343
LGG_RS08585	LGG_01783	pbp2A	penicillin-binding protein 1A	3958.67	3123	3513	3333	2058	1441
LGG_RS08590	LGG_01784	rluD	pseudouridylate synthase	478.333	496.333	356	483	687	595
LGG_RS08595	LGG_01785	argR	ArgR family transcriptional regulator	2835.67	2954.67	2354	3060	1869	1899
LGG_RS08600	LGG_01786	argS	arginyl-tRNA synthetase	7005.33	8387	6195	8815	4109	5098
LGG_RS08605	LGG_02997	tRNA-Gly	tRNA-Gly	146	187.667	124	197	80	127
LGG_RS08610	LGG_01787	NO NAME	hypothetical protein	509	579.333	376	513	356	635
LGG_RS08615	LGG_01788	NO NAME	hypothetical protein	198	276.333	151	274	142	247
LGG_RS08620	LGG_01789	pyrD	dihydroorotate dehydrogenase	2594.33	2783.67	2001	2843	3124	3311
LGG_RS08625	LGG_01790	NO NAME	glycerophosphoryl diester phosphodiesterase	7765.33	9183	5378	8463	9978	9178
LGG_RS08630	LGG_01791	mecA	adapter protein MecA	6915	7502	4385	7391	5809	8662
LGG_RS08635	LGG_01792	spxA	ArsR family transcriptional regulator	1432.33	1699.67	1011	1592	1801	3122
LGG_RS08640	LGG_01793	yhfI	hypothetical protein	2503	2569	2078	2582	3431	4508
LGG_RS08645	LGG_01794	NO NAME	hypothetical protein	4732.67	4484.67	3143	4108	3032	4879
LGG_RS08650	LGG_01795	NO NAME	peptide ABC transporter permease	5050.33	4707	3690	4631	4937	5459
LGG_RS08655	LGG_01796	vraD	bacitracin ABC transporter ATP-binding protein	780.333	773.333	684	734	1161	1375
LGG_RS08660	LGG_01798	graR	two-component system response regulator	1471	1280	1171	1274	2126	2493
LGG_RS08665	LGG_01799	graS	signal transduction histidine kinase	2487.33	1787.33	2145	1776	3026	3000
LGG_RS08670	LGG_01800	nrdG	anaerobic ribonucleoside-triphosphate reductase activating protein	932.667	624.667	590	557	1625	1269
LGG_RS08675	LGG_01801	copB	ATPase	6940.67	3247.33	930	2033	6252	6011
LGG_RS08680	LGG_01802	copY	uracil phosphoribosyltransferase	2697.67	1374.33	183	758	1080	1465
LGG_RS08685	LGG_01803	purD	phosphoribosylamine--glycine ligase	315675	82924.3	551	43674	938	511
LGG_RS08690	LGG_01805	purH	purine biosynthesis protein purH	308608	85499	623	46352	881	519
LGG_RS08695	LGG_01806	purN	phosphoribosylglycinamide formyltransferase	97157.3	26560	165	14443	266	152
LGG_RS08700	LGG_01807	purM	phosphoribosylaminoimidazole synthetase	213350	58554	438	32521	559	285
LGG_RS08705	LGG_01808	purF	amidophosphoribosyltransferase	262755	70956.3	1136	41311	636	320
LGG_RS08710	LGG_01809	purL	phosphoribosylformylglycinamidine synthase	476682	140798	15768	86877	1068	570
LGG_RS08715	LGG_01810	purQ	phosphoribosylformylglycinamidine synthase	129586	42472.7	10688	27603	250	197
LGG_RS08720	LGG_01811	purS	phosphoribosylformylglycinamidine synthase	55288.7	19084	6017	13083	100	65
LGG_RS08725	LGG_01812	purC	phosphoribosylaminoimidazole-succinocarboxamide synthase	151546	55292.3	23117	38777	289	183
LGG_RS08730	LGG_01813	purK	phosphoribosylaminoimidazole carboxylase	234220	90609	44579	64970	440	277
LGG_RS08735	LGG_01814	purE	N5-carboxyaminoimidazole ribonucleotide mutase	34436.7	15369	7621	11790	90	60
LGG_RS08740	LGG_01815	NO NAME	thiamine transporter ThiT	987.333	1112	507	1074	744	1480
LGG_RS08745	LGG_01817	iolT	MFS transporter	3014.67	5819	2706	5178	1785	4224
LGG_RS08750	not predicted	NO NAME	alpha-galactosidase	220	254	94	231	129	309
LGG_RS08755	LGG_01820	ptsI	phosphoenolpyruvate-protein phosphotransferase	205431	153383	118278	153711	96426	119741
LGG_RS08760	LGG_01821	ptsH	phosphocarrier protein HPr	52043	41096.7	29450	41299	22091	20698
LGG_RS08765	LGG_01822	NO NAME	hypothetical protein	10932.7	8013	5847	6979	5480	4749
LGG_RS08770	LGG_01823	clpE	ATP-dependent Clp protease ATP-binding protein	53788.7	58283.3	36134	60608	12650	18494
LGG_RS08775	LGG_01824	NO NAME	hypothetical protein	397.667	369	285	359	634	1114
LGG_RS08780	LGG_01825	prfC	peptide chain release factor 3	4961.67	3284.33	4424	3410	4649	3141
LGG_RS08785	LGG_01826	hlyX	hypothetical protein	1814.33	1497	1487	1517	1380	1448
LGG_RS08790	LGG_01827	yueF	membrane protein	1340.67	1615.33	978	1510	1398	2269
LGG_RS08795	LGG_01828	elaA	GNAT family acetyltransferase	362	494.667	234	432	322	575
LGG_RS08800	LGG_01829	NO NAME	hypothetical protein	1488.33	1669	973	1513	1772	3030
LGG_RS08805	LGG_01830	groEL	hypothetical protein	985	1207	617	1190	1353	2491
LGG_RS08810	LGG_01831	recX	recombinase RecX	927.333	1022.33	550	939	1300	1874
LGG_RS08815	LGG_01832	NO NAME	transcriptional regulator	2496	2955	1757	2875	2579	2839
LGG_RS08820	LGG_01833	NO NAME	hypothetical protein	719.667	686.667	477	651	812	666
LGG_RS08825	LGG_01834	rumA	RNA methyltransferase	3188.33	2680.67	2391	2683	3090	2349
LGG_RS08830	LGG_01835	NO NAME	nucleoside 2-deoxyribosyltransferase	1121.67	927.333	854	854	1041	646
LGG_RS08835	LGG_01836	spxB	pyruvate oxidase	2922.33	2246.33	1751	2524	1752	1648
LGG_RS08840	LGG_01837	mvaS	hydroxymethylglutaryl-CoA synthase	14055.7	10689	11667	10651	7432	4696
LGG_RS08845	LGG_01838	mvaA	hydroxymethylglutaryl-CoA reductase	9633.67	6848.33	8436	7054	6088	3763
LGG_RS08850	LGG_01839	phbA	3-ketoacyl-CoA thiolase	12250	9226.67	9855	9400	7206	4798
LGG_RS08855	LGG_01840	NO NAME	hypothetical protein	685.667	743.333	495	738	544	524
LGG_RS08860	LGG_01841	pepQ	sugar phosphate isomerase	1350	1401.33	1046	1437	1232	1218
LGG_RS08865	LGG_01842	NO NAME	MFS transporter	1360	1213	1064	1234	1099	923
LGG_RS08870	LGG_01845	NO NAME	aldose 1-epimerase	2203.67	872	869	997	706	731
LGG_RS08875	LGG_01846	dapE	acetylornithine deacetylase	3794.67	2722.33	2696	2815	2530	1851
LGG_RS08880	LGG_01847	NO NAME	membrane protein	1105.33	885.667	823	855	863	640
LGG_RS08885	LGG_01848	NO NAME	hypothetical protein	0	0	0	0	0	0
LGG_RS08890	LGG_02979	tRNA-Leu	tRNA-Leu	23.6667	31.3333	19	28	29	41
LGG_RS08895	LGG_01849	NO NAME	GNAT family acetyltransferase	356.667	454	237	408	386	456
LGG_RS08900	LGG_01850	ydcK	sprT-like	223.667	254	170	243	241	336
LGG_RS08905	LGG_01851	NO NAME	phosphonate ABC transporter ATP-binding protein	199	183	173	153	550	1359
LGG_RS08910	LGG_01852	ABC-MSP	branched-chain amino acid ABC transporter permease	101.667	77.6667	120	78	109	53
LGG_RS08915	LGG_01853	ABC-SBP	peptide ABC transporter substrate-binding protein	157.333	103.667	186	116	109	50
LGG_RS08920	LGG_01854	NO NAME	hypothetical protein	1571	1203.33	1502	1372	424	419
LGG_RS08925	LGG_01855	pacL	ATPase	10147.7	7873.67	9380	8899	3845	3191
LGG_RS08930	LGG_01857	pbpX	serine hydrolase	1285.67	1021	966	1003	1542	1676
LGG_RS08935	LGG_01858	nadE	NAD synthetase	3902.33	3022	2527	2810	2655	1955
LGG_RS08940	LGG_01859	pbpX	serine hydrolase	8389.67	6463.33	5480	5967	5292	3081
LGG_RS08945	LGG_01860	pncB	nicotinate phosphoribosyltransferase	15671.3	12876.3	9953	11880	8985	5646
LGG_RS08950	LGG_01861	def	GntR family transcriptional regulator	13714.7	10540.3	8192	10067	5537	4106
LGG_RS08955	LGG_01862	nagA	N-acetylglucosamine-6-phosphate deacetylase	26904.3	21329.3	17201	21434	11053	6254
LGG_RS08960	LGG_01863	proC	pyrroline-5-carboxylate reductase	5419.67	4071	3644	4580	2395	1502
LGG_RS08965	LGG_01864	yuxL	peptidase S9	29764	23527.7	21237	24513	10476	7765
LGG_RS08970	LGG_01865	NO NAME	matrix-binding protein	4106.67	3713.33	5132	3518	4855	1683
LGG_RS08975	LGG_01866	NO NAME	hypothetical protein	436.333	1003.33	274	1041	671	1065
LGG_RS08980	LGG_02996	tRNA-Tyr	tRNA-Tyr	32	30.3333	26	34	26	59
LGG_RS08985	LGG_01867	NO NAME	phosphohydrolase	472.667	188	352	197	620	537
LGG_RS08990	LGG_01868	dtpT	peptide ABC transporter permease	976.667	453.667	693	437	991	998
LGG_RS08995	LGG_01869	salX	sulfate ABC transporter ATP-binding protein	2786.33	2587.33	1958	2892	2622	2969
LGG_RS09000	LGG_01870	NO NAME	hypothetical protein	260.333	247.333	158	217	582	988
LGG_RS09005	LGG_01871	NO NAME	hypothetical protein	59.3333	48.6667	32	61	63	139
LGG_RS09010	LGG_01872	NO NAME	melibiose symporter	2877.67	3092.67	1883	3733	954	1759
LGG_RS09015	LGG_01874	NO NAME	alpha-L-fucosidase	5948.33	5660.67	4014	6438	2284	3035
LGG_RS09020	LGG_01875	NO NAME	glutaredoxin	464	323.667	194	292	445	561
LGG_RS09025	LGG_01876	pck	phosphoenolpyruvate carboxykinase	5007.33	3158.33	1893	2639	3133	2463
LGG_RS09030	LGG_01878	feoB	ferrous iron transporter B	7344	6138.33	3510	5253	5298	4609
LGG_RS09035	LGG_01879	feoA	iron transporter FeoA	2502.33	2044.67	1371	1832	1780	1636
LGG_RS09040	LGG_01880	NO NAME	acyltransferase	2445	2200.67	1203	1880	1714	2031
LGG_RS09045	LGG_01881	NO NAME	uridine kinase	293.333	283	197	307	305	351
LGG_RS09050	LGG_02980	tRNA-Glu	tRNA-Glu	18	16.6667	16	24	13	30
LGG_RS09055	LGG_02981	tRNA-Thr	tRNA-Thr	127.333	87.6667	80	73	39	105
LGG_RS09060	LGG_01882	ywnB	NADH-flavin reductase	4829.67	4876	3181	5256	2826	4060
LGG_RS09065	LGG_01883	NO NAME	hypothetical protein	5130.67	4809.33	3356	5095	2712	3192
LGG_RS09070	LGG_01884	NO NAME	hypothetical protein	552.667	444.667	630	411	550	519
LGG_RS09075	LGG_02995	tRNA-Asn	tRNA-Asn	7	2.66667	10	8	2	5
LGG_RS09080	LGG_03011	5S rRNA	5S ribosomal RNA	0	0	0	0	0	0
LGG_RS09085	LGG_03006	23S rRNA	23S ribosomal RNA	0	0	0	1	0	0
LGG_RS09090	LGG_02994	tRNA-Ala	tRNA-Ala	43.6667	66.6667	26	38	41	90
LGG_RS09095	LGG_02993	tRNA-Ile	tRNA-Ile	172.667	214.667	76	188	139	286
LGG_RS09100	LGG_03016	16S rRNA	16S ribosomal RNA	0	0	0	0	0	0
LGG_RS09105	LGG_01893	serS	seryl-tRNA synthetase	17684.7	13827.7	12003	12867	15812	25173
LGG_RS09110	not predicted	NO NAME	hypothetical protein	4031.33	3300.67	2764	3024	3344	6003
LGG_RS09115	LGG_01894	NO NAME	transcriptional regulator	1915	2638.33	1439	2900	2460	4816
LGG_RS09120	LGG_01895	NO NAME	transcriptional regulator	1866	2097.67	1303	1945	2452	3201
LGG_RS09125	LGG_01896	lysP	gamma-aminobutyrate permease	517	369	389	365	797	573
LGG_RS09130	LGG_01898	alsD	alpha-acetolactate decarboxylase	9770	5886	4837	7295	2655	3406
LGG_RS09135	LGG_01899	alsS	acetolactate synthase	18155	10052	8509	12554	3296	5585
LGG_RS09140	LGG_01900	NO NAME	hypothetical protein	439.667	792.667	610	606	2188	4193
LGG_RS09145	LGG_01901	NO NAME	acetyltransferase	111	139	61	123	158	384
LGG_RS09150	LGG_01902	NO NAME	cell surface protein	166.333	206	93	186	429	437
LGG_RS09155	LGG_01903	NO NAME	hypothetical protein	4485	4519.67	2895	4644	3454	5817
LGG_RS09160	LGG_01904	rpmG	50S ribosomal protein L33	2640.67	2563.67	1711	2511	2461	6209
LGG_RS09165	LGG_01905	NO NAME	cell division protein Fic	338	1035	288	933	402	440
LGG_RS09170	LGG_01906	rluD	pseudouridylate synthase	650	2004.33	625	1659	243	245
LGG_RS09175	LGG_01907	NO NAME	esterase	4110.33	4998	3115	4466	1679	3363
LGG_RS09180	LGG_01908	NO NAME	hypothetical protein	21323.7	21329.7	17406	17830	10373	2711
LGG_RS09185	LGG_01909	NO NAME	phage infection protein	167.333	140.333	91	121	378	553
LGG_RS09190	LGG_01910	citG	triphosphoribosyl-dephospho-CoA synthase	851.333	876	521	783	930	1375
LGG_RS09195	LGG_01911	citG	GntR family transcriptional regulator	480	506.667	286	492	574	602
LGG_RS09200	LGG_01912	oadA	oxaloacetate decarboxylase	519	393	365	324	558	437
LGG_RS09205	LGG_01913	citX	2-(5''-triphosphoribosyl)-3'-dephospho-CoA synthase	290.667	199	216	191	265	201
LGG_RS09210	LGG_01914	citF	citrate lyase subunit alpha	649.333	389.333	457	337	568	375
LGG_RS09215	LGG_01915	citE	citrate lyase	361.333	197.667	234	205	311	191
LGG_RS09220	LGG_01916	citD	citrate lyase subunit gamma	142.667	85.3333	78	59	116	62
LGG_RS09225	LGG_01917	citC	[citrate [pro-3S]-lyase] ligase	314	182.667	175	145	296	184
LGG_RS09230	not predicted	NO NAME	hypothetical protein	51.6667	28	34	17	46	25
LGG_RS09235	LGG_01918	oadB	glutaconyl-CoA decarboxylase subunit beta	490.333	307	239	303	390	340
LGG_RS09240	LGG_01919	oadG	biotin carboxyl carrier protein	112	81	63	87	97	86
LGG_RS09245	LGG_01920	NO NAME	hypothetical protein	102.333	71.3333	50	70	75	80
LGG_RS09250	LGG_01921	citM	citrate transporter	43.6667	37.3333	23	39	108	97
LGG_RS09255	LGG_01922	NO NAME	hypothetical protein	449.333	357	261	317	787	1118
LGG_RS09260	LGG_01923	kptA	RNA 2'-phosphotransferase	276	353	139	303	202	383
LGG_RS09265	LGG_01924	yveC	GNAT family acetyltransferase	324.333	419.667	208	378	387	433
LGG_RS09270	LGG_01925	NO NAME	NADP oxidoreductase	237.333	287.667	127	252	357	404
LGG_RS09275	LGG_01926	NO NAME	PadR family transcriptional regulator	118.667	134.333	67	144	111	99
LGG_RS09280	LGG_01927	NO NAME	membrane protein	220.667	271	164	279	238	209
LGG_RS09285	LGG_01929	nfsA	nitroreductase	1381.33	1381.33	941	1366	818	608
LGG_RS09290	LGG_01930	ecsA	ABC transporter ATP-binding protein	1599.33	1583	1064	1818	1035	1063
LGG_RS09295	LGG_01931	NO NAME	ABC transporter permease	1408	1522.67	1015	1623	1350	1190
LGG_RS09300	LGG_01932	NO NAME	transcriptional regulator	791.333	878.667	576	886	750	648
LGG_RS09305	LGG_01933	NO NAME	MFS transporter	716.333	896.333	719	826	994	926
LGG_RS09310	LGG_01934	NO NAME	permease	155.333	163.667	137	143	181	149
LGG_RS09315	LGG_01935	NO NAME	XRE family transcriptional regulator	1114.67	1015.67	696	1007	884	895
LGG_RS09320	LGG_01936	NO NAME	alpha/beta hydrolase	425	433.667	331	432	397	409
LGG_RS09325	LGG_01937	gntR	GntR family transcriptional regulator	212.333	254.333	187	267	157	161
LGG_RS09330	LGG_01938	NO NAME	ABC transporter ATP-binding protein	455.333	541.333	388	561	328	378
LGG_RS09335	LGG_01939	NO NAME	ABC transporter permease	600.333	630.667	509	636	498	414
LGG_RS09340	LGG_01940	oppF	peptide ABC transporter ATP-binding protein	12116.7	2130	14653	2517	10053	3542
LGG_RS09345	LGG_01941	oppD	peptide ABC transporter ATP-binding protein	14569	2454.33	17664	2929	12358	3537
LGG_RS09350	LGG_01942	NO NAME	hypothetical protein	3672	494.333	4472	609	3357	899
LGG_RS09355	LGG_01943	oppC	diguanylate cyclase	8864.33	1097	10918	1317	7995	2131
LGG_RS09360	LGG_01944	oppB	peptide ABC transporter permease	9428.67	1126	11263	1252	8268	1751
LGG_RS09365	LGG_01945	oppA	peptide ABC substrate-binding protein	25155	2952.33	31717	3574	21971	3978
LGG_RS09370	LGG_01946	NO NAME	hypothetical protein	134.667	50.3333	66	69	110	149
LGG_RS09375	LGG_01947	NO NAME	ABC transporter ATP-binding protein	39.6667	37	34	59	44	81
LGG_RS09380	LGG_01948	NO NAME	ABC transporter ATP-binding protein	34.6667	59.6667	25	55	64	98
LGG_RS09385	LGG_01949	NO NAME	hypothetical protein	1265.33	1265.67	690	1104	541	1208
LGG_RS09390	LGG_01950	NO NAME	type III restriction endonuclease subunit R	1044	814.667	626	823	667	510
LGG_RS09395	LGG_01951	NO NAME	aminoglycoside phosphotransferase	139	148.333	68	131	357	349
LGG_RS09400	LGG_01952	NO NAME	peptidase M10	536	434.667	441	434	433	400
LGG_RS09405	LGG_01953	NO NAME	peptidoglycan-binding protein LysM	11746.7	21533.3	8393	24117	1184	5133
LGG_RS09410	LGG_01954	lciIC	XRE family transcriptional regulator	78	107.333	54	95	110	122
LGG_RS09415	LGG_01955	NO NAME	reverse transcriptase	4509.33	4392.33	2949	3740	2957	3210
LGG_RS09425	pseudo-gene	NO NAME	transposase	0	0	0	0	0	0
LGG_RS09430	not predicted	NO NAME	transposase	114.667	136	53	84	231	213
LGG_RS09435	LGG_01959	is50	transposase	127	139.667	81	113	259	251
LGG_RS09440	not predicted	NO NAME	transposase	171.667	176.667	100	198	83	67
LGG_RS09445	LGG_01960	NO NAME	hypothetical protein	2.66667	1.66667	1	5	10	3
LGG_RS09450	LGG_01961	is51	transposase	13.3333	8.33333	5	8	9	24
LGG_RS09455	LGG_01962	NO NAME	transposase	53	41.3333	30	46	64	76
LGG_RS09460	LGG_01963	NO NAME	hypothetical protein	96	109.333	46	97	260	247
LGG_RS09465	LGG_01964	NO NAME	hypothetical protein	349	430.667	225	365	1028	985
LGG_RS09470	LGG_01965	is52	transposase	5	6	3	4	10	11
LGG_RS09475	pseudo-gene	NO NAME	terminase	45.6667	62	20	44	197	350
LGG_RS09480	not predicted	NO NAME	hypothetical protein	267.333	442.667	99	259	425	823
LGG_RS09485	LGG_01968	guaA	GMP synthase	25122.7	20785	21013	18939	21501	26889
LGG_RS09490	LGG_01969	coaA	type I pantothenate kinase	3052	2451	1885	2619	938	1044
LGG_RS09495	LGG_01970	NO NAME	hypothetical protein	190.333	209.333	102	194	268	529
LGG_RS09500	LGG_01971	NO NAME	hypothetical protein	182.667	199.333	117	152	237	419
LGG_RS09505	LGG_01972	pepD	peptidase U34	11335.3	7752.33	9116	8725	8675	6976
LGG_RS09510	LGG_01974	ykhA	acyl-CoA hydrolase	235.333	173.333	203	209	316	256
LGG_RS09515	LGG_01975	rep	ATP-dependent DNA helicase	2725.67	2700.67	2587	3073	2765	2477
LGG_RS09520	LGG_01976	NO NAME	hypothetical protein	34	18.3333	19	23	63	60
LGG_RS09525	LGG_01977	NO NAME	Tat pathway signal protein	75	59.3333	57	65	128	84
LGG_RS09530	LGG_01978	napA	potassium transporter	4310	3392.67	3585	4045	2664	2010
LGG_RS09535	LGG_01979	pepR	prolyl aminopeptidase	28769	23763.7	20756	23623	15387	14746
LGG_RS09540	LGG_01980	yjhE	phage tail protein	5105.67	4054.33	4124	3815	2595	2464
LGG_RS09545	LGG_01981	mntH	manganese transporter	1368.33	1209.67	1117	1293	1018	763
LGG_RS09550	LGG_01982	hemH	ferrochelatase	597.667	565.333	455	599	439	416
LGG_RS09555	LGG_01983	pgm	fructose 2%2C6-bisphosphatase	890	958	507	947	698	1666
LGG_RS09560	LGG_01984	rhaD	rhamnulose-1-phosphate aldolase	127.333	87.3333	106	112	72	123
LGG_RS09565	LGG_01985	NO NAME	ABC transporter permease	2332	724.667	2932	800	1344	667
LGG_RS09570	LGG_01986	vraD	bacitracin ABC transporter ATP-binding protein	948.333	303	1126	315	499	244
LGG_RS09575	LGG_01987	NO NAME	amino acid permease	367	370.667	326	317	548	614
LGG_RS09580	LGG_01988	NO NAME	diacylglycerol kinase	483.333	689.667	333	607	620	940
LGG_RS09585	LGG_01989	hflX	GTP-binding protein	13279.7	9796	9586	9959	7958	8510
LGG_RS09590	LGG_01990	NO NAME	deacetylase	443	485.667	311	480	655	720
LGG_RS09595	pseudo-gene	NO NAME	UDP-N-acetylglucosamine 2-epimerase	1995.67	1953	1555	1780	2510	1310
LGG_RS09600	LGG_01993	NO NAME	hypothetical protein	3243.67	2946	2537	2950	3301	1821
LGG_RS09605	LGG_01994	NO NAME	hypothetical protein	4082.67	4108.67	3108	3964	3411	2039
LGG_RS09610	LGG_01995	NO NAME	hypothetical protein	2292.67	2463.33	1629	2485	1597	936
LGG_RS09615	LGG_01996	rmlD	dTDP-4-dehydrorhamnose reductase	55326.7	43382	41708	48105	28760	21386
LGG_RS09620	LGG_01997	rmlB	dTDP-glucose 4%2C6-dehydratase	57055.7	45651.3	43833	51572	30696	22333
LGG_RS09625	LGG_01998	rmlC	dTDP-4-dehydrorhamnose 3%2C5-epimerase	22618	18253.3	17821	21193	13459	10763
LGG_RS09630	LGG_01999	rmlA	glucose-1-phosphate thymidylyltransferase	24434.3	20312.3	18834	25698	16583	16057
LGG_RS09635	LGG_02000	NO NAME	Lyzozyme M1 (1%2C4-beta-N-acetylmuramidase)	163.667	146.333	138	139	292	157
LGG_RS09640	LGG_02001	NO NAME	hypothetical protein	907	843	660	851	1170	746
LGG_RS09645	LGG_02002	NO NAME	hypothetical protein	432.667	414.333	360	434	432	244
LGG_RS09650	LGG_02003	is53	transposase	69	72.3333	50	73	57	41
LGG_RS09655	LGG_02004	eps3	UDP-phosphate galactose phosphotransferase	9492	8533.33	7026	8913	5329	4525
LGG_RS09660	LGG_02005	galE	epimerase	6209.33	5558.67	4566	6003	3372	3823
LGG_RS09665	LGG_02006	glnP	glutamine ABC transporter permease	609	989.333	527	834	419	733
LGG_RS09670	LGG_02007	glnP	glutamine ABC transporter permease	1089	1829	888	1833	646	1091
LGG_RS09675	LGG_02008	glnH	glutamine ABC transporter substrate-binding protein	1484.33	2438.33	1118	2439	826	1538
LGG_RS09680	LGG_02009	glnQ	arginine ABC transporter ATP-binding protein	855.667	1456	618	1431	520	1182
LGG_RS09685	LGG_02010	NO NAME	hypothetical protein	5864.33	5838	4441	6013	3156	3845
LGG_RS09690	LGG_02011	NO NAME	hypothetical protein	4283	4391	3376	4696	2721	2657
LGG_RS09695	LGG_02012	fur	Fur family transcriptional regulator	753.333	769.667	677	777	630	1240
LGG_RS09700	LGG_02014	gmk	guanylate kinase	1982	2279	1339	2240	1215	1291
LGG_RS09705	LGG_02015	NO NAME	GNAT family acetyltransferase	454.333	357.333	251	415	295	433
LGG_RS09710	LGG_02016	NO NAME	hypothetical protein	14674.3	5520	7677	8586	9222	23523
LGG_RS09715	LGG_02017	tyrS	tyrosyl-tRNA synthetase	1817.33	1182.67	1847	1292	2046	1877
LGG_RS09720	LGG_02019	NO NAME	cobalt transporter	381.333	403	238	469	724	759
LGG_RS09725	LGG_02020	NO NAME	ArsR family transcriptional regulator	98.6667	123	62	101	228	275
LGG_RS09730	LGG_02021	apbE	membrane protein	1212.33	1022.67	767	1118	1447	2584
LGG_RS09735	LGG_02022	amy	amylopullulanase	3050.33	3610	1411	3105	3251	5276
LGG_RS09740	LGG_02023	glgP	glycogen phosphorylase	5906.33	7570	2586	6530	5963	8876
LGG_RS09745	LGG_02024	glgA	glycogen synthase	3773.33	4718	1199	3722	4056	6869
LGG_RS09750	LGG_02025	glgD	glucose-1-phosphate adenylyltransferase	2173	2509.67	566	2063	2123	4411
LGG_RS09755	LGG_02026	glgC	glucose-1-phosphate adenylyltransferase	1439.67	1662.67	318	1249	1728	3358
LGG_RS09760	LGG_02027	glgB	glycogen-branching protein	1971.33	2152	541	1669	2066	4788
LGG_RS09765	LGG_02028	ilvE	branched-chain amino acid aminotransferase	2742.33	5293.67	2203	5216	1709	5045
LGG_RS09770	LGG_02030	NO NAME	cell surface protein	109	89.6667	56	79	51	103
LGG_RS09775	LGG_02031	NO NAME	membrane protein	1185.33	418.667	379	567	438	616
LGG_RS09780	LGG_02032	fbp	fructose 1%2C6-bisphosphatase	2861.33	779.667	761	1240	458	595
LGG_RS09785	LGG_02033	is54	transposase	0.333333	0.666667	0	0	1	0
LGG_RS09790	LGG_02034	spxA	arsenate reductase	2350.67	2321	1011	2009	633	2987
LGG_RS09795	LGG_02035	clpL	ATP-dependent Clp protease ATP-binding protein	4470.33	8324	3891	9428	1419	2215
LGG_RS09800	LGG_02036	wzb	tyrosine protein phosphatase	3790	2534	1760	2355	1242	1197
LGG_RS09805	LGG_02037	wzr1	transcriptional regulator	11812.3	9073.67	9618	10445	9474	7815
LGG_RS09810	LGG_02038	rmlB	dTDP-glucose 4%2C6-dehydratase	1860.33	1416.67	1241	1197	3346	2033
LGG_RS09815	LGG_02039	rmlC	dTDP-4-dehydrorhamnose 3%2C5-epimerase	932	805.333	586	611	2275	1319
LGG_RS09820	LGG_02040	rmlA1	glucose-1-phosphate thymidylyltransferase	565.667	493.333	391	351	1889	1266
LGG_RS09825	LGG_02041	is55	transposase	0	0	0	0	0	0
LGG_RS09830	LGG_02042	rmlA2	glucose-1-phosphate thymidylyltransferase	489.333	536.667	244	454	690	510
LGG_RS09835	LGG_02043	welE	multidrug MFS transporter	1638.67	1565	1194	1492	2424	1489
LGG_RS09840	LGG_02044	welF	glycosyl transferase family 1	1946	1429.33	1445	1309	4022	2183
LGG_RS09845	LGG_02045	welG	glycosyl transferase	2280.33	1204.33	2066	1076	3968	1206
LGG_RS09850	LGG_02046	welH	alpha-L-Rha alpha-1%2C3-L-rhamnosyltransferase	3103.33	1636.33	2724	1497	4717	1681
LGG_RS09855	LGG_02047	WelI	glycosyl transferase family 1	3522.67	2020.33	3334	2028	5259	1989
LGG_RS09860	LGG_02048	welJ	glycosyl transferase	1641	843.667	1580	880	2531	1020
LGG_RS09865	LGG_02049	wzx	polysaccharide transporter protein	4600.67	2264.33	4489	2441	5864	2520
LGG_RS09870	LGG_02050	glf	UDP-galactopyranose mutase	6498.67	3156	5937	3524	7511	3313
LGG_RS09875	LGG_02051	NO NAME	polymerase	5321	2644.67	4127	2842	5747	3605
LGG_RS09880	LGG_02052	wze	exopolysaccharide biosynthesis protein	8081	4357	6778	4892	8191	5671
LGG_RS09885	LGG_02053	wzd	capsular polysaccharide biosynthesis protein	5196	3186.67	4125	3818	5212	4451
LGG_RS09890	LGG_02054	NO NAME	acyltransferase	780	359.333	470	449	578	1069
LGG_RS09895	LGG_02055	NO NAME	hypothetical protein	1491	1214	1055	1310	1302	1426
LGG_RS09900	LGG_02056	NO NAME	hypothetical protein	305	230	219	246	297	312
LGG_RS09905	LGG_02057	ccl	membrane protein	2802.67	2715.67	2169	2863	2984	4341
LGG_RS09910	LGG_02058	fabG	3-ketoacyl-ACP reductase	1434	1044.67	1018	1147	1529	2590
LGG_RS09915	LGG_02059	yiaA	hypothetical protein	379	335.333	231	388	406	813
LGG_RS09920	LGG_02060	bcnIC	XRE family transcriptional regulator	106.667	97.3333	63	91	49	71
LGG_RS09925	LGG_02061	gpm	phosphoglycerate mutase	1178.33	1084	717	862	427	495
LGG_RS09930	LGG_02062	oppF	peptide ABC transporter substrate-binding protein	9451	15161.7	12988	13128	4088	3676
LGG_RS09935	LGG_02063	oppD	peptide ABC transporter ATP-binding protein	10014.3	15640.3	13395	13584	4093	3484
LGG_RS09940	LGG_02064	oppC	peptide ABC transporter permease	8108	12502.7	10455	11181	3128	2314
LGG_RS09945	LGG_02065	oppB	peptide ABC transporter permease	9513.33	15073	12097	13901	3747	2457
LGG_RS09950	LGG_02066	oppA	peptide ABC transporter substrate-binding protein	25835	42505	29560	39512	10518	12401
LGG_RS09955	LGG_02067	NO NAME	MFS transporter	432.667	542	268	542	478	954
LGG_RS09960	LGG_02068	efp	elongation factor P	6839.67	5756.67	4412	5438	3858	3679
LGG_RS09965	LGG_02069	yrjD	hypothetical protein	9625.67	7759.33	5510	7967	5710	6263
LGG_RS09970	LGG_02070	ykgF	amino acid dehydrogenase	14020	11880.3	7994	12473	7504	10244
LGG_RS09975	LGG_02071	ykgE	Fe-S oxidoreductase	4739.67	4317.67	2734	4808	2780	4853
LGG_RS09980	LGG_02073	NO NAME	hypothetical protein	1564.33	1972.33	1115	1615	2052	4701
LGG_RS09985	LGG_02074	celC	PTS cellobiose transporter subunit IIA	79.3333	169	57	183	104	276
LGG_RS09990	LGG_02075	ybhE	hypothetical protein	163	355.667	119	344	335	624
LGG_RS09995	LGG_02076	NO NAME	hypothetical protein	69.6667	105.667	49	111	136	168
LGG_RS10000	LGG_02078	celB	PTS cellobiose transporter subunit IIC	95.6667	121	65	146	220	271
LGG_RS10005	LGG_02079	melA	alpha-galactosidase	3763	3432.33	2717	3684	2548	3014
LGG_RS10010	LGG_02080	yaaA	hypothetical protein	1074.33	794.667	793	865	812	858
LGG_RS10015	LGG_02081	NO NAME	LytTR family transcriptional regulator	109.667	107	132	120	89	148
[truncated: 818 more rows]

## Sheet: GG OD2 counts
Gene	Old locus tag	Gene name	Gene product	Repl1	Repl2	Repl3	Mean
LGG_RS00005	LGG_00001	dnaA	chromosomal replication initiator protein DnaA	8021	9341	6681	8014.33
LGG_RS00010	LGG_00002	dnaN	DNA polymerase III subunit beta	14060	16587	12721	14456
LGG_RS00015	LGG_00003	yaaA	RNA-binding protein	422	419	390	410.333
LGG_RS00020	LGG_00004	recF	DNA recombination protein RecF	3018	3076	2994	3029.33
LGG_RS00025	LGG_00005	gyrB	DNA gyrase subunit B	15600	17667	14773	16013.3
LGG_RS00030	LGG_00006	gyrA	DNA gyrase subunit A	29333	32000	25020	28784.3
LGG_RS00035	not predicted	NO NAME	hypothetical protein	9	1	5	5
LGG_RS00040	LGG_00008	NO NAME	hypothetical protein	32	10	20	20.6667
LGG_RS00050	LGG_00009	NO NAME	hypothetical protein	181	122	92	131.667
LGG_RS00055	not predicted	NO NAME	deoxyribose-phosphate aldolase	134	117	92	114.333
LGG_RS00060	LGG_00010	ssb1	single-stranded DNA-binding protein	83	44	62	63
LGG_RS00065	LGG_00011	rpsF	30S ribosomal protein S6	13309	11208	10510	11675.7
LGG_RS00070	LGG_00012	ssb2	single-stranded DNA-binding protein	21045	17558	12981	17194.7
LGG_RS00075	LGG_00013	rpsR	30S ribosomal protein S18	12035	10344	8307	10228.7
LGG_RS00080	LGG_00015	pfpI	general stress protein	2585	3157	3570	3104
LGG_RS00085	LGG_00016	cydA	cytochrome D ubiquinol oxidase subunit I	159	143	144	148.667
LGG_RS00090	LGG_00017	cydB	cytochrome C oxidase assembly protein	130	125	117	124
LGG_RS00095	LGG_00018	NO NAME	hypothetical protein	46	35	34	38.3333
LGG_RS00100	LGG_00020	is1	transposase	0	0	0	0
LGG_RS00105	LGG_00021	NO NAME	abortive infection protein	50	60	52	54
LGG_RS00110	LGG_00022	is2	transposase	0	1	0	0.333333
LGG_RS00115	LGG_00023	NO NAME	membrane protein	32	32	25	29.6667
LGG_RS00120	LGG_00024	NO NAME	hypothetical protein	55	54	34	47.6667
LGG_RS00125	LGG_00025	NO NAME	ABC transporter	13	19	14	15.3333
LGG_RS00130	LGG_00026	is3	transposase	0	0	0	0
LGG_RS00135	LGG_00027	NO NAME	hypothetical protein	71	88	79	79.3333
LGG_RS00140	LGG_00028	NO NAME	ABC transporter ATP-binding protein	119	137	96	117.333
LGG_RS00145	LGG_00029	NO NAME	ammonium transporter	18	21	22	20.3333
LGG_RS00150	LGG_00030	NO NAME	hypothetical protein	51	53	40	48
LGG_RS00155	LGG_00031	p40	hypothetical protein	4245	4999	4615	4619.67
LGG_RS00160	LGG_00032	NO NAME	peptide ABC transporter permease	586	822	652	686.667
LGG_RS00165	LGG_00033	ABC-NBD	macrolide ABC transporter ATP-binding protein	71	74	64	69.6667
LGG_RS00170	LGG_00034	NO NAME	TetR family transcriptional regulator	1170	1057	1148	1125
LGG_RS00175	LGG_00035	NO NAME	haloacid dehalogenase	2215	2046	2152	2137.67
LGG_RS00180	LGG_00036	NO NAME	hypothetical protein	679	626	495	600
LGG_RS00185	LGG_00037	NO NAME	permease	1213	1397	1210	1273.33
LGG_RS00190	LGG_00038	NO NAME	membrane protein	500	495	411	468.667
LGG_RS00195	LGG_00039	maa	maltose O-acetyltransferase	905	1024	831	920
LGG_RS00200	LGG_00040	NO NAME	hypothetical protein	638	729	582	649.667
LGG_RS00205	LGG_00041	pepD	peptidase C69	18410	20168	16381	18319.7
LGG_RS00210	LGG_00042	NO NAME	membrane protein	405	422	329	385.333
LGG_RS00215	LGG_00043	NO NAME	hypothetical protein	153	146	99	132.667
LGG_RS00220	not predicted	NO NAME	hypothetical protein	165	156	130	150.333
LGG_RS00225	not predicted	NO NAME	hypothetical protein	125	116	98	113
LGG_RS00230	not predicted	NO NAME	glycosyl hydrolase family 25	54	42	36	44
LGG_RS00235	not predicted	NO NAME	hypothetical protein	63	77	48	62.6667
LGG_RS00240	LGG_00047	NO NAME	hypothetical protein	89	90	92	90.3333
LGG_RS00245	LGG_00048	azlC	azaleucine resistance protein AzlC	35	30	28	31
LGG_RS00250	LGG_00049	NO NAME	branched-chain amino acid ABC transporter	30	23	10	21
LGG_RS00255	LGG_00050	uidA	beta-glucuronidase	253	98	186	179
LGG_RS00260	LGG_00051	galC	glycoside hydrolase	831	338	625	598
LGG_RS00265	LGG_00052	eda	ketohydroxyglutarate aldolase	1250	1294	1184	1242.67
LGG_RS00270	LGG_00053	kdgK	2-dehydro-3-deoxygluconokinase	1255	1299	1420	1324.67
LGG_RS00275	pseudo-gene	NO NAME	glucuronate isomerase	3458	3714	3715	3629
LGG_RS00280	LGG_00056	uxuA	mannonate dehydratase	2449	2032	2321	2267.33
LGG_RS00285	LGG_00057	uxuB	dioxygenase	2215	1152	1800	1722.33
LGG_RS00290	LGG_00058	NO NAME	transporter	644	286	451	460.333
LGG_RS00295	LGG_00059	kdgR	GntR family transcriptional regulator	1622	1032	1221	1291.67
LGG_RS00300	LGG_00060	kdfK	2-dehydro-3-deoxygluconokinase	1105	651	748	834.667
LGG_RS00305	LGG_00061	NO NAME	galactosidase	2055	1518	1634	1735.67
LGG_RS00310	LGG_00062	NO NAME	hypothetical protein	110	81	88	93
LGG_RS00315	LGG_00063	NO NAME	FMN-binding protein	488	418	316	407.333
LGG_RS00320	LGG_00064	ypiB	MFS transporter permease	392	447	363	400.667
LGG_RS00325	LGG_00065	aes	alpha/beta hydrolase	35	31	28	31.3333
LGG_RS00330	LGG_00066	NO NAME	TetR family transcriptional regulator	186	197	155	179.333
LGG_RS00335	LGG_00067	NO NAME	hypothetical protein	59	49	27	45
LGG_RS00340	LGG_00068	NO NAME	membrane protein	1538	2197	1338	1691
LGG_RS00345	LGG_00069	NO NAME	TetR family transcriptional regulator	120	175	139	144.667
LGG_RS00350	LGG_00070	NO NAME	hypothetical protein	11904	24424	25737	20688.3
LGG_RS00355	LGG_00071	NO NAME	amidohydrolase	20874	48267	57850	42330.3
LGG_RS00360	LGG_00072	NO NAME	membrane protein	5501	14140	13394	11011.7
LGG_RS00365	LGG_00073	NO NAME	membrane protein	11028	30415	30307	23916.7
LGG_RS00370	LGG_00074	NO NAME	hypothetical protein	26	26	45	32.3333
LGG_RS00375	LGG_00075	opuCd	amino acid ABC transporter permease	11024	12987	10477	11496
LGG_RS00380	LGG_00076	opuCc	glycine/betaine ABC transporter substrate-binding protein	14925	18179	14988	16030.7
LGG_RS00385	LGG_00077	opuCb	choline ABC transporter permease	8232	10103	7302	8545.67
LGG_RS00390	LGG_00078	opuCa	glycine/betaine ABC transporter ATP-binding protein	20027	23917	20298	21414
LGG_RS00395	LGG_00079	NO NAME	hypothetical protein	130	180	127	145.667
LGG_RS00400	LGG_00080	zntR	MerR family transcriptional regulator	177	227	158	187.333
LGG_RS00405	LGG_00081	NO NAME	hypothetical protein	159	135	137	143.667
LGG_RS00410	LGG_00082	cadA	metal-transporting ATPase	89	93	100	94
LGG_RS00415	LGG_00083	copZ	hypothetical protein	39	57	42	46
LGG_RS00420	LGG_00084	NO NAME	DNA-binding protein	157	169	185	170.333
LGG_RS00425	LGG_00085	flp	transcriptional regulator	386	486	358	410
LGG_RS00430	LGG_00086	NO NAME	TetR family transcriptional regulator	49	63	39	50.3333
LGG_RS00435	LGG_00087	NO NAME	membrane protein	46	51	39	45.3333
LGG_RS00440	LGG_00088	NO NAME	hypothetical protein	31	37	29	32.3333
LGG_RS00445	LGG_00089	NO NAME	membrane protein	51	73	55	59.6667
LGG_RS00450	pseudo-gene	NO NAME	PTS fructose transporter subunit IIB	84	44	66	64.6667
LGG_RS00455	LGG_00092	frvA	PTS cellobiose transporter subunit IIA	39	12	37	29.3333
LGG_RS00460	LGG_00093	NO NAME	alpha-mannosidase	144	101	105	116.667
LGG_RS00465	LGG_00094	NO NAME	transcriptional regulator	48	58	37	47.6667
LGG_RS00470	LGG_00095	bglB	6-phospho-beta-glucosidase	60	88	57	68.3333
LGG_RS00475	LGG_00096	glk	ROK family transcriptional regulator	23	30	25	26
LGG_RS00480	LGG_00098	trpA	tryptophan synthase subunit alpha	64	55	43	54
LGG_RS00485	LGG_00099	trpB	tryptophan synthase subunit beta	80	90	65	78.3333
LGG_RS00490	LGG_00100	trpF	N-(5'-phosphoribosyl)anthranilate isomerase	21	30	14	21.6667
LGG_RS00495	LGG_00101	trpC	indole-3-glycerol-phosphate synthase	32	56	35	41
LGG_RS00500	LGG_00102	trpD	anthranilate phosphoribosyltransferase	31	22	13	22
LGG_RS00505	not predicted	NO NAME	hypothetical protein	2	2	4	2.66667
LGG_RS00510	LGG_00104	NO NAME	MFS transporter permease	18	36	29	27.6667
LGG_RS00515	LGG_00105	NO NAME	TetR family transcriptional regulator	101	115	100	105.333
LGG_RS00520	LGG_00106	NO NAME	hypothetical protein	116	154	154	141.333
LGG_RS00525	pseudo-gene	NO NAME	AbrB family transcriptional regulator	44	37	37	39.3333
LGG_RS00530	LGG_00107	rmlC	dTDP-4-dehydrorhamnose 3%2C5-epimerase	483	528	413	474.667
LGG_RS00535	LGG_00108	dapB	4-hydroxy-tetrahydrodipicolinate reductase	4633	5307	4519	4819.67
LGG_RS00540	LGG_00109	dapA	4-hydroxy-tetrahydrodipicolinate synthase	7138	8366	7164	7556
LGG_RS00545	LGG_00110	hipO	acetyldiaminopimelate deacetylase	7784	9227	7376	8129
LGG_RS00550	LGG_00111	dapD	2%2C3%2C4%2C5-tetrahydropyridine-2%2C6-carboxylate N-succinyltransferase	3271	3935	3088	3431.33
LGG_RS00555	LGG_00112	lysA	diaminopimelate decarboxylase	5253	5943	4417	5204.33
LGG_RS00560	LGG_00113	lysC	aspartate kinase	1679	1782	1122	1527.67
LGG_RS00565	LGG_00114	dapF	diaminopimelate epimerase	2503	2647	1903	2351
LGG_RS00570	LGG_00115	asd	aspartate-semialdehyde dehydrogenase	2971	3018	2162	2717
LGG_RS00575	LGG_00116	NO NAME	hypothetical protein	84	63	69	72
LGG_RS00580	LGG_00117	NO NAME	transcriptional regulator	31	34	20	28.3333
LGG_RS00585	not predicted	NO NAME	hypothetical protein	71	54	24	49.6667
LGG_RS00590	LGG_00118	NO NAME	ADP-ribose pyrophosphatase	20	25	10	18.3333
LGG_RS00595	LGG_00119	NO NAME	peptide ABC transporter ATP-binding protein	79	95	75	83
LGG_RS00600	LGG_00120	NO NAME	hypothetical protein	270	248	194	237.333
LGG_RS00605	LGG_00121	yybT	hypothetical protein	7364	7254	6203	6940.33
LGG_RS00610	LGG_00122	rplI	50S ribosomal protein L9	3209	3480	2876	3188.33
LGG_RS00615	LGG_00123	dnaB	DNA helicase	3763	4077	3739	3859.67
LGG_RS00620	LGG_00124	NO NAME	hypothetical protein	2528	2719	2558	2601.67
LGG_RS00625	pseudo-gene	NO NAME	permease	99	73	83	85
LGG_RS00630	LGG_00126	murQ	N-acetylmuramic acid 6-phosphate etherase	92	31	62	61.6667
LGG_RS00635	LGG_00127	yleB	hypothetical protein	72	35	51	52.6667
LGG_RS00640	LGG_00128	NO NAME	RpiR family transcriptional regulator	319	386	310	338.333
LGG_RS00645	LGG_00129	NO NAME	TetR family transcriptional regulator	91	111	82	94.6667
LGG_RS00650	LGG_00130	psaA	macrolide ABC transporter ATP-binding protein	11	19	21	17
LGG_RS00655	LGG_00131	ileS	ABC transporter permease	112	174	145	143.667
LGG_RS00660	LGG_00132	NO NAME	amidohydrolase	94	139	130	121
LGG_RS00665	LGG_00133	purA	adenylosuccinate synthetase	17871	26469	20843	21727.7
LGG_RS00670	LGG_00135	cadA	metal-transporting ATPase	243	323	314	293.333
LGG_RS00675	LGG_00136	yozA	ArsR family transcriptional regulator	410	377	238	341.667
LGG_RS00680	LGG_00137	NO NAME	transporter	58	37	46	47
LGG_RS00685	LGG_00138	nrdD	ribonucleoside triphosphate reductase	4314	5158	3987	4486.33
LGG_RS00690	LGG_00139	NO NAME	hypothetical protein	91	78	74	81
LGG_RS00695	LGG_00140	uvrB	membrane protein	2137	1554	2057	1916
LGG_RS00700	not predicted	NO NAME	hypothetical protein	74	61	93	76
LGG_RS00705	not predicted	NO NAME	XRE family transcriptional regulator	196	176	179	183.667
LGG_RS00710	not predicted	NO NAME	hypothetical protein	71	66	64	67
LGG_RS00715	LGG_00143	NO NAME	hypothetical protein	0	0	0	0
LGG_RS00720	LGG_00144	is4	transposase	67	77	76	73.3333
LGG_RS00725	LGG_00145	yveB	phospholipid phosphatase	984	1159	860	1001
LGG_RS00730	LGG_00146	NO NAME	peptidase S66	1622	1883	1650	1718.33
LGG_RS00735	LGG_00147	NO NAME	hypothetical protein	87	103	85	91.6667
LGG_RS00740	LGG_00148	ddlA	D-alanine--D-alanine ligase	7467	7864	6948	7426.33
LGG_RS00745	LGG_00149	NO NAME	hypothetical protein	5	3	3	3.66667
LGG_RS00750	LGG_00150	NO NAME	hypothetical protein	127	161	122	136.667
LGG_RS00755	LGG_00151	NO NAME	MFS transporter	1009	1106	900	1005
LGG_RS00760	LGG_00153	is6	transposase	32	18	11	20.3333
LGG_RS00765	LGG_00154	NO NAME	hypothetical protein	74	95	96	88.3333
LGG_RS00770	LGG_00155	baeS	two-component system sensor histidine kinase	739	830	611	726.667
LGG_RS00775	LGG_00156	beaR	two-component system response regulator	319	353	284	318.667
LGG_RS00780	LGG_00157	ogt	methylated-DNA--protein-cysteine methyltransferase	448	433	426	435.667
LGG_RS00785	LGG_00158	ldhD	lactate dehydrogenase	14319	16193	13289	14600.3
LGG_RS00790	LGG_00159	celB	PTS sugar transporter	406	156	373	311.667
LGG_RS00795	LGG_00160	celA	PTS cellobiose transporter subunit IIA	544	207	485	412
LGG_RS00800	LGG_00161	NO NAME	PTS cellobiose transporter subunit IIC	489	216	482	395.667
LGG_RS00805	LGG_00162	celC	PTS cellobiose transporter subunit IIC	1460	536	1258	1084.67
LGG_RS00810	LGG_00163	bglA	6-phospho-beta-glucosidase	1236	597	936	923
LGG_RS00815	LGG_00164	yydk	GntR family transcriptional regulator	372	639	351	454
LGG_RS00820	LGG_00165	NO NAME	hypothetical protein	441	1934	743	1039.33
LGG_RS00825	LGG_00166	NO NAME	membrane protein	312	1591	593	832
LGG_RS00830	LGG_00167	NO NAME	hypothetical protein	128	787	239	384.667
LGG_RS00835	LGG_00168	pbuO	guanine permease	10924	53316	32221	32153.7
LGG_RS00840	LGG_00169	NO NAME	sulfur reduction protein DsrE	266	398	340	334.667
LGG_RS00845	not predicted	NO NAME	hypothetical protein	160	221	154	178.333
LGG_RS00850	LGG_00171	NO NAME	hypothetical protein	264	356	299	306.333
LGG_RS00855	LGG_00172	tauB	taurine ABC transporter ATP-binding protein	82	113	96	97
LGG_RS00860	LGG_00173	tauA	sulfonate ABC transporter substrate-binding protein	118	122	101	113.667
LGG_RS00865	LGG_00174	tauC	taurine ABC transporter permease	80	97	66	81
LGG_RS00870	LGG_00175	naoX	pyridine nucleotide-disulfide oxidoreductase	225	259	174	219.333
LGG_RS00875	LGG_00176	NO NAME	membrane protein	37	34	32	34.3333
LGG_RS00880	LGG_00177	NO NAME	LysR family transcriptional regulator	663	693	556	637.333
LGG_RS00885	LGG_00178	mhqA	glyoxalase	193	193	167	184.333
LGG_RS00890	LGG_00179	NO NAME	hypothetical protein	174	103	101	126
LGG_RS00895	LGG_00180	yoaA	alanine acetyltransferase	399	358	292	349.667
LGG_RS00900	LGG_00181	NO NAME	hypothetical protein	44	65	44	51
LGG_RS00905	LGG_00182	NO NAME	hypothetical protein	16	23	15	18
LGG_RS00910	LGG_00183	yqcC	cell surface protein	63	76	63	67.3333
LGG_RS00915	LGG_00184	ynjC	cell surface protein	77	91	68	78.6667
LGG_RS00920	LGG_00185	NO NAME	hypothetical protein	56	45	35	45.3333
LGG_RS00925	LGG_00186	NO NAME	hypothetical protein	448	422	360	410
LGG_RS00930	LGG_00187	NO NAME	membrane protein	1718	1628	962	1436
LGG_RS00935	LGG_00188	NO NAME	hypothetical protein	1132	1028	1002	1054
LGG_RS00940	LGG_00189	ycaJ	ATPase AAA	9394	4797	7309	7166.67
LGG_RS00945	LGG_00190	ackA	acetate kinase	7206	3430	5168	5268
LGG_RS00950	LGG_00191	glpR	alkaline phosphatase	142	179	127	149.333
LGG_RS00955	LGG_00192	NO NAME	xylulokinase	204	66	137	135.667
LGG_RS00960	LGG_00193	fbaA	fructose-bisphosphate aldolase	191	132	181	168
LGG_RS00965	LGG_00194	ulaA	PTS ascorbate transporter subunit IIC	356	252	317	308.333
LGG_RS00970	LGG_00195	pphA	hypothetical protein	1500	2016	1610	1708.67
LGG_RS00975	LGG_00196	NO NAME	endonuclease III	1090	1596	1312	1332.67
LGG_RS00980	LGG_00197	NO NAME	MFS transporter permease	2560	3652	2960	3057.33
LGG_RS00985	LGG_00200	xfp	phosphoketolase	47647	64947	72368	61654
LGG_RS00990	LGG_00201	oppA	peptide ABC transporter substrate-binding protein	4283	4154	3950	4129
LGG_RS00995	LGG_00202	NO NAME	hypothetical protein	25	26	33	28
LGG_RS01000	LGG_00203	NO NAME	hypothetical protein	22	23	22	22.3333
LGG_RS01005	LGG_00204	NO NAME	PTS mannose transporter subunit IID	42	38	44	41.3333
LGG_RS01010	LGG_00205	abc	ABC transporter ATP-binding protein	39	38	36	37.6667
LGG_RS01015	LGG_00206	NO NAME	hypothetical protein	45	62	54	53.6667
LGG_RS01020	LGG_00207	NO NAME	NUDIX hydrolase	321	385	292	332.667
LGG_RS01025	LGG_00208	NO NAME	hypothetical protein	2611	3145	2714	2823.33
LGG_RS01030	LGG_00209	NO NAME	ABC transporter permease	409	476	368	417.667
LGG_RS01035	LGG_00210	rrg	XRE family transcriptional regulator	296	378	229	301
LGG_RS01040	LGG_00211	NO NAME	FAD-dependent oxidoreductase	4299	5507	4606	4804
LGG_RS01045	LGG_00212	nox	NADH oxidase	2929	3383	3052	3121.33
LGG_RS01050	LGG_00213	NO NAME	hypothetical protein	2526	2972	2415	2637.67
LGG_RS01055	LGG_00215	NO NAME	hypothetical protein	2972	3664	2395	3010.33
LGG_RS01060	LGG_00216	yxaA	permease	1785	1919	1479	1727.67
LGG_RS01065	LGG_00217	ywjH	membrane protein	873	846	671	796.667
LGG_RS01070	LGG_00218	NO NAME	hypothetical protein	1704	1743	1399	1615.33
LGG_RS01075	LGG_00219	NO NAME	membrane protein	949	1051	846	948.667
LGG_RS01080	LGG_00220	NO NAME	hypothetical protein	90	109	80	93
LGG_RS01085	LGG_00221	fldA	flavodoxin	591	504	706	600.333
LGG_RS01090	LGG_00222	NO NAME	hypothetical protein	722	765	723	736.667
LGG_RS01095	LGG_00223	NO NAME	hypothetical protein	1149	1099	1165	1137.67
LGG_RS01100	LGG_00225	serA	2-hydroxyacid dehydrogenase	6665	8035	6934	7211.33
LGG_RS01105	LGG_00226	NO NAME	sugar ABC transporter substrate-binding protein	1061	1078	859	999.333
LGG_RS01110	LGG_00227	ydaS	membrane protein	35	34	28	32.3333
LGG_RS01115	LGG_00228	NO NAME	hypothetical protein	92	119	94	101.667
LGG_RS01120	LGG_00229	NO NAME	hypothetical protein	34	51	31	38.6667
LGG_RS01125	LGG_00230	asp1	alkaline-shock protein	124	138	139	133.667
LGG_RS01130	LGG_00231	asp2	alkaline-shock protein	353	356	331	346.667
LGG_RS01135	LGG_00232	NO NAME	haloacid dehalogenase	151	191	111	151
LGG_RS01140	LGG_00233	NO NAME	membrane protein	8189	8513	5827	7509.67
LGG_RS01145	LGG_00234	NO NAME	hypothetical protein	7026	7184	4370	6193.33
LGG_RS01150	not predicted	NO NAME	transposase	0	0	0	0
LGG_RS01155	LGG_00236	is8	transposase	438	388	309	378.333
LGG_RS01160	LGG_00238	pcp	pyrrolidone-carboxylate peptidase	9371	9007	6551	8309.67
LGG_RS01165	LGG_00239	pks	NADP oxidoreductase	999	1095	1095	1063
LGG_RS01170	pseudo-gene	NO NAME	hypothetical protein	337	435	360	377.333
LGG_RS01175	LGG_00240	cobQ	cobyric acid synthase	4117	4636	4233	4328.67
LGG_RS01180	LGG_00241	NO NAME	hypothetical protein	4676	5497	5061	5078
LGG_RS01185	LGG_00242	rsmG	16S rRNA methyltransferase	3998	5028	3913	4313
LGG_RS01190	LGG_00243	noc	nucleoid occlusion protein	6124	7548	6714	6795.33
LGG_RS01195	LGG_00244	soj	sporulation initiation inhibitor Soj	7132	8750	7195	7692.33
LGG_RS01200	LGG_00245	parB	chromosome partitioning protein ParB	13579	16335	13857	14590.3
LGG_RS01205	LGG_00246	NO NAME	hypothetical protein	3633	4353	3748	3911.33
LGG_RS01210	LGG_00247	ychF	GTP-binding protein	19706	22855	19421	20660.7
LGG_RS01215	LGG_00248	NO NAME	membrane protein	11719	13860	11060	12213
LGG_RS01220	LGG_00249	guaB	inosine-5-monophosphate dehydrogenase	10365	11366	9240	10323.7
LGG_RS01225	LGG_00251	NO NAME	hypothetical protein	178	292	163	211
LGG_RS01230	LGG_00252	vanR	two-component system response regulator	6396	6377	5340	6037.67
LGG_RS01235	LGG_00253	vanS	two-component system sensor histidine kinase	15448	16800	12752	15000
LGG_RS01240	LGG_00254	dacA	D-alanyl-D-alanine carboxypeptidase	23794	25676	19272	22914
LGG_RS01245	LGG_00256	greA	transcription elongation factor GreA	4323	4713	3654	4230
LGG_RS01250	LGG_00257	murE	UDP-N-acetylmuramoylalanyl-D-glutamate--2%2C 6-diaminopimelate ligase	15027	17424	14294	15581.7
LGG_RS01255	LGG_00258	racD	aspartate racemase	10268	11865	10026	10719.7
LGG_RS01260	LGG_00259	dkgA	2%2C5-diketo-D-gluconic acid reductase	7270	8235	7421	7642
LGG_RS01265	LGG_00260	iolR	alkaline phosphatase	464	573	513	516.667
LGG_RS01270	LGG_00261	iolT	MFS transporter	52	65	69	62
LGG_RS01275	LGG_00262	iolA	methylmalonate-semialdehyde dehydrogenase	248	61	163	157.333
LGG_RS01280	LGG_00263	iolB	5-deoxy-glucuronate isomerase	243	44	161	149.333
LGG_RS01285	LGG_00264	iolC	5-dehydro-2-deoxygluconokinase	174	63	137	124.667
LGG_RS01290	LGG_00265	iolD	3D-(3%2C5/4)-trihydroxycyclohexane-1%2C2-dione hydrolase	178	137	149	154.667
LGG_RS01295	LGG_00266	iolG1	inositol 2-dehydrogenase	95	104	99	99.3333
LGG_RS01300	LGG_00267	iolG2	inositol 2-dehydrogenase	95	91	125	103.667
LGG_RS01305	LGG_00268	iolE	myo-inosose-2 dehydratase	134	166	140	146.667
LGG_RS01310	LGG_00269	iolJ	fructose-bisphosphate aldolase	131	89	91	103.667
LGG_RS01315	LGG_00270	iolK	tautomerase	69	68	50	62.3333
LGG_RS01320	LGG_00271	iolI	xylose isomerase	20	27	19	22
LGG_RS01325	LGG_00272	iolH	protein iolH	47	83	45	58.3333
LGG_RS01330	LGG_00273	gntR	RpiR family transcriptional regulator	490	553	418	487
LGG_RS01335	LGG_00274	gnd	6-phosphogluconate dehydrogenase	658	760	544	654
LGG_RS01340	LGG_00275	gntK	gluconokinase	1985	2478	1762	2075
LGG_RS01345	LGG_00277	gntP	gluconate permease	343	242	211	265.333
LGG_RS01350	LGG_00278	NO NAME	hypothetical protein	4453	5599	4105	4719
LGG_RS01355	LGG_00279	welA	dTDP-rhamnosyl transferase	3268	4534	3091	3631
LGG_RS01360	LGG_00280	welB	alpha-L-Rha alpha-1%2C3-L-rhamnosyltransferase	2341	3205	2174	2573.33
LGG_RS01365	LGG_00281	welC	alpha-L-Rha alpha-1%2C3-L-rhamnosyltransferase	4390	5425	3800	4538.33
LGG_RS01370	LGG_00282	eps1	polysaccharide transporter%2C PST family protein	2509	2702	1820	2343.67
LGG_RS01375	LGG_00283	eps2	hypothetical protein	2519	2900	1794	2404.33
LGG_RS01380	LGG_00284	NO NAME	hypothetical protein	1526	1546	1151	1407.67
LGG_RS01385	LGG_00285	znuC	ABC transporter ATP-binding protein	2617	2633	2236	2495.33
LGG_RS01390	LGG_00286	znuB	ABC transporter	1601	1580	1026	1402.33
LGG_RS01395	LGG_00287	NO NAME	phosphoesterase	5647	6190	4464	5433.67
LGG_RS01400	LGG_00288	mmsB	oxidoreductase	5296	5826	4212	5111.33
LGG_RS01405	LGG_00289	pepF	oligopeptidase PepB	7523	8192	5810	7175
LGG_RS01410	LGG_00290	lytR	LytR family transcriptional regulator	2998	2642	2190	2610
LGG_RS01415	LGG_00292	brnQ	branched-chain amino acid transporter II carrier protein	197	283	177	219
LGG_RS01420	LGG_00293	NO NAME	hydrolase	120	129	161	136.667
LGG_RS01425	LGG_00294	glcR	DeoR family transcriptional regulator	1336	1399	1348	1361
LGG_RS01430	LGG_00295	NO NAME	glycosyl transferase family 2	1484	1629	1769	1627.33
LGG_RS01435	LGG_00296	NO NAME	membrane protein	908	869	1433	1070
LGG_RS01440	LGG_00297	NO NAME	hypothetical protein	575	501	802	626
LGG_RS01445	LGG_00298	spi	signal peptidase	2218	2249	1559	2008.67
LGG_RS01450	LGG_00299	NO NAME	ADP-ribosylglycohydrolase	502	423	312	412.333
LGG_RS01455	LGG_00300	ABC-NBD	multidrug ABC transporter ATP-binding protein	813	1320	616	916.333
LGG_RS01460	LGG_00301	NO NAME	methylase	282	360	275	305.667
LGG_RS01465	LGG_03012	16S rRNA	16S ribosomal RNA	0	0	0	0
LGG_RS01470	LGG_03002	23S rRNA	23S ribosomal RNA	0	1	1	0.666667
LGG_RS01475	LGG_03007	5S rRNA	5S ribosomal RNA	0	0	0	0
LGG_RS01480	not predicted	NO NAME	thiol-disulfide isomerase	117	104	103	108
LGG_RS01485	LGG_00311	labL	membrane protein	352	399	382	377.667
LGG_RS01490	LGG_00312	NO NAME	membrane protein	230	210	213	217.667
LGG_RS01495	LGG_00313	livJ	branched-chain amino acid ABC transporter substrate-binding protein	178	202	179	186.333
LGG_RS01500	LGG_00314	livH	ABC transporter permease	134	129	103	122
LGG_RS01505	LGG_00315	livM	branched-chain amino acid ABC transporter permease	91	99	61	83.6667
LGG_RS01510	LGG_00316	livG	branched-chain amino acid ABC transporter ATP-binding protein	118	102	93	104.333
LGG_RS01515	LGG_00317	livF	branched-chain amino acid ABC transporter ATP-binding protein	125	140	143	136
LGG_RS01520	LGG_00318	yvdC	hypothetical protein	47	48	34	43
LGG_RS01525	LGG_00319	NO NAME	acyltransferase	1519	1475	1261	1418.33
LGG_RS01530	LGG_00320	pts	PTS cellobiose transporter subunit IIC	1240	1192	982	1138
LGG_RS01535	LGG_00321	deoC	deoxyribose-phosphate aldolase	4141	3668	4100	3969.67
LGG_RS01540	LGG_00322	deoB	phosphopentomutase	10727	8133	9480	9446.67
LGG_RS01545	LGG_00323	deoD	purine nucleoside phosphorylase	7048	4820	6544	6137.33
LGG_RS01550	LGG_00324	p75	glycoside hydrolase	52508	54653	45316	50825.7
LGG_RS01555	LGG_00325	nox	pyridine nucleotide-disulfide oxidoreductase	26701	20421	20505	22542.3
LGG_RS01560	LGG_00326	NO NAME	hypothetical protein	447	470	317	411.333
LGG_RS01565	LGG_00327	NO NAME	hypothetical protein	380	414	285	359.667
LGG_RS01570	LGG_00328	srmB	ATP-dependent helicase	890	905	671	822
LGG_RS01575	LGG_00329	upgB	ABC transporter substrate-binding protein	2524	2726	2502	2584
LGG_RS01580	LGG_00330	NO NAME	hypothetical protein	1686	1521	1533	1580
LGG_RS01585	LGG_00331	manA	mannose-6-phosphate isomerase	14068	12653	14061	13594
LGG_RS01590	LGG_00332	gntR	GntR family transcriptional regulator	11349	7422	12706	10492.3
LGG_RS01595	LGG_00333	agaS	tagatose-6-phosphate ketose	25875	15898	27503	23092
LGG_RS01600	LGG_00334	nagA	N-acetylglucosamine-6-phosphate deacetylase	24502	15266	26612	22126.7
LGG_RS01605	LGG_00336	bgaC	beta-galactosidase	30702	22883	26102	26562.3
LGG_RS01610	LGG_00337	manB	PTS mannose transporter subunit IIAB	8348	7207	7762	7772.33
LGG_RS01615	LGG_00338	manC	PTS fructose transporter subunit IIC	7058	6141	5743	6314
LGG_RS01620	LGG_00339	manD	PTS fructose transporter subunit IID	9741	7168	6544	7817.67
LGG_RS01625	LGG_00340	manA	PTS fructose transporter subunit IIA	7069	4860	5549	5826
LGG_RS01630	LGG_00341	lacC	tagatose-6-phosphate kinase	19365	3346	11930	11547
LGG_RS01635	LGG_00342	srlD	sorbitol-6-phosphate 2-dehydrogenase	20201	3933	11706	11946.7
LGG_RS01640	LGG_00343	gatC	PTS galactitol transporter subunit IIC	29404	8722	17942	18689.3
LGG_RS01645	LGG_00344	is9	transposase	2	3	1	2
LGG_RS01650	LGG_00345	gatA	PTS galactitol transporter subunit IIA	5038	4384	3382	4268
LGG_RS01655	LGG_00346	gatB	PTS galactitol transporter subunit IIB	3360	2156	2070	2528.67
LGG_RS01660	LGG_00347	NO NAME	hypothetical protein	1422	872	895	1063
LGG_RS01665	LGG_00348	yohJ	glycosyl transferase family 1	2515	2988	2387	2630
LGG_RS01670	LGG_00349	yohH	glycosyl transferase family 1	3002	3502	2900	3134.67
LGG_RS01675	LGG_00350	NO NAME	hypothetical protein	4315	4675	3776	4255.33
LGG_RS01680	LGG_00351	patB	aminotransferase	168	144	104	138.667
LGG_RS01685	LGG_00352	ypdF	aminopeptidase	55	52	32	46.3333
LGG_RS01690	LGG_00353	pts	PTS lactose transporter subunit IIC	51	43	40	44.6667
LGG_RS01695	LGG_00354	celA	PTS lactose transporter subunit IIB	15	11	7	11
LGG_RS01700	LGG_00355	chbA	PTS lactose transporter subunit IIA	8	5	7	6.66667
LGG_RS01705	LGG_00356	ypdE	aminopeptidase	22	22	25	23
LGG_RS01710	LGG_00357	NO NAME	transcriptional antiterminator	44	49	37	43.3333
LGG_RS01715	LGG_00358	pepT	peptidase M20	713	628	470	603.667
LGG_RS01720	LGG_00359	oppA	peptide ABC transporter substrate-binding protein	1530	1389	955	1291.33
LGG_RS01725	LGG_00360	yhbS	N-acetyltransferase GCN5	1869	1800	1167	1612
LGG_RS01730	LGG_00361	NO NAME	hypothetical protein	1015	859	663	845.667
LGG_RS01735	LGG_00362	nisT	ABC transporter ATP-binding protein	146	173	124	147.667
LGG_RS01740	LGG_00363	NO NAME	cobalt ABC transporter permease	10	4	8	7.33333
LGG_RS01745	LGG_00364	cbiO	cobalt ABC transporter ATP-binding protein	12	12	8	10.6667
LGG_RS01750	LGG_00365	cbiQ	cobalt ABC transporter permease	8	6	2	5.33333
LGG_RS01755	LGG_00366	tenA	thiaminase II	7	7	5	6.33333
LGG_RS01760	LGG_00367	thiW	hydroxyethylthiazole permease	1	6	3	3.33333
LGG_RS01765	LGG_00368	thiM	hydroxyethylthiazole kinase	15	18	15	16
LGG_RS01770	LGG_00369	thiE	thiamine-phosphate pyrophosphorylase	22	15	23	20
LGG_RS01775	LGG_00370	thiD	phosphomethylpyrimidine kinase	112	123	112	115.667
LGG_RS01780	LGG_00371	ycaM	amino acid permease	429	769	414	537.333
LGG_RS01785	LGG_00372	rbsR	LacI family transcriptional regulator	3229	1772	3099	2700
LGG_RS01790	LGG_00373	rbsK	ribokinase	2519	768	2106	1797.67
LGG_RS01795	LGG_00374	NO NAME	XRE family transcriptional regulator	106	69	81	85.3333
LGG_RS01800	not predicted	NO NAME	hypothetical protein	150	98	110	119.333
LGG_RS01805	LGG_00376	is10	transposase	11	13	6	10
LGG_RS01810	not predicted	NO NAME	hypothetical protein	861	954	734	849.667
LGG_RS01815	LGG_00377	NO NAME	hypothetical protein	1077	1054	998	1043
LGG_RS01820	LGG_00379	NO NAME	hypothetical protein	9	23	10	14
LGG_RS01825	LGG_00380	NO NAME	membrane protein	43	50	30	41
LGG_RS01830	LGG_00381	NO NAME	hypothetical protein	55	73	39	55.6667
LGG_RS01835	LGG_00382	pbp	penicillin-binding protein	4288	5220	3582	4363.33
LGG_RS01840	LGG_00383	is11	transposase	0	0	0	0
LGG_RS01845	not predicted	NO NAME	hypothetical protein	100	130	117	115.667
LGG_RS01850	LGG_00385	NO NAME	hypothetical protein	30	14	16	20
LGG_RS01855	LGG_00386	NO NAME	MFS transporter permease	490	501	561	517.333
LGG_RS01860	LGG_00387	slyA	MarR family transcriptional regulator	185	235	251	223.667
LGG_RS01865	LGG_00388	NO NAME	hypothetical protein	368	348	420	378.667
LGG_RS01870	LGG_00389	NO NAME	hypothetical protein	143	146	164	151
LGG_RS01875	LGG_00390	aroE	DNA-binding protein	136	148	165	149.667
LGG_RS01880	LGG_00391	NO NAME	hypothetical protein	28	20	9	19
LGG_RS01885	LGG_00392	NO NAME	hypothetical protein	34	42	32	36
LGG_RS01890	LGG_00393	manR	transcription antiterminator	60	66	65	63.6667
LGG_RS01895	LGG_00394	NO NAME	PTS sugar transporter subunit IIABC	14	8	5	9
LGG_RS01900	LGG_00395	frwA1	PTS fructose transporter subunit IIA	37	24	30	30.3333
LGG_RS01905	LGG_00396	frwB1	PTS fructose transporter subunit IIB	29	22	31	27.3333
LGG_RS01910	LGG_00397	frwC1	PTS fructose transporter subunit IIC	110	78	88	92
LGG_RS01915	LGG_00398	tal	fructose-6-phosphate aldolase	117	85	113	105
LGG_RS01920	LGG_00399	rpe	allulose-6-phosphate 3-epimerase	86	64	75	75
LGG_RS01925	LGG_00400	ulaA	PTS lactose transporter subunit IIA	65	37	37	46.3333
LGG_RS01930	LGG_00401	ulaB	PTS lactose transporter subunit IIB	49	23	46	39.3333
LGG_RS01935	LGG_00402	pts	PTS trehalose transporter subunit IIBC	63	43	45	50.3333
LGG_RS01940	LGG_00403	is12	transposase	0	0	0	0
LGG_RS01945	LGG_00404	ulaC	PTS ascorbate transporter subunit IIC	169	116	176	153.667
LGG_RS01950	LGG_00405	tktN	transketolase	142	110	129	127
LGG_RS01955	LGG_00406	tktC	transketolase	111	98	86	98.3333
LGG_RS01960	LGG_00407	scrK	fructokinase	1390	482	916	929.333
LGG_RS01965	LGG_00408	lacR	Lactose phosphotransferase system repressor	359	335	347	347
LGG_RS01970	LGG_00409	frwA2	PTS fructose transporter subunit IIA	97	35	79	70.3333
LGG_RS01975	LGG_00410	frwB2	PTS fructose transporter subunit IIB	69	28	71	56
LGG_RS01980	LGG_00411	frwC2	PTS fructose IIC component	195	113	172	160
LGG_RS01985	LGG_00412	is13	transposase	0	0	0	0
LGG_RS01990	LGG_00413	fba	fructose-bisphosphate aldolase	165	102	124	130.333
LGG_RS01995	LGG_00414	gatY	hypothetical protein	542	608	535	561.667
LGG_RS02000	LGG_00415	pts	PTS mannose transporter subunit IIB	11056	3046	8600	7567.33
LGG_RS02005	LGG_00416	pts	PTS mannose transporter subunit IIB	10298	2398	9164	7286.67
LGG_RS02010	LGG_00417	manZ	PTS mannose transporter subunit IICD	52556	15036	38054	35215.3
LGG_RS02015	LGG_00418	tal	transaldolase	38061	14763	29400	27408
LGG_RS02020	LGG_00419	NO NAME	LacI family transcriptional regulator	2604	993	1524	1707
LGG_RS02025	LGG_00420	yhfZ	GntR family transcriptional regulator	5050	2972	3968	3996.67
LGG_RS02030	LGG_00421	NO NAME	hypothetical protein	1694	716	1416	1275.33
LGG_RS02035	LGG_00422	NO NAME	hypothetical protein	1289	538	1235	1020.67
LGG_RS02040	LGG_00423	NO NAME	membrane protein	1045	492	916	817.667
LGG_RS02045	LGG_00424	php	hydrolase	738	416	687	613.667
LGG_RS02050	LGG_00425	yhfS	hypothetical protein	715	484	569	589.333
LGG_RS02055	LGG_00426	yhfX	amino acid racemase	545	465	526	512
LGG_RS02060	LGG_00427	YHFW	mutase	662	605	589	618.667
LGG_RS02065	LGG_00428	ilvH	DNA-directed RNA polymerase subunit delta	6844	8555	7321	7573.33
LGG_RS02070	LGG_00429	NO NAME	membrane protein	4827	6215	4514	5185.33
LGG_RS02075	LGG_00430	cbiO	heme ABC transporter ATP-binding protein	15268	20729	15187	17061.3
LGG_RS02080	LGG_00431	cbiQ	cobalt ABC transporter permease	6906	9019	6867	7597.33
LGG_RS02085	not predicted	NO NAME	hypothetical protein	246	334	243	274.333
LGG_RS02090	LGG_00433	menC	O-succinylbenzoate synthase	62	67	65	64.6667
LGG_RS02095	LGG_00434	nagZ	beta-N-acetylglucosaminidase	5819	1190	6208	4405.67
LGG_RS02100	not predicted	NO NAME	transposase	38	44	29	37
LGG_RS02105	LGG_00436	tnpR	resolvase	354	443	403	400
LGG_RS02110	LGG_00437	NO NAME	hypothetical protein	261	292	316	289.667
LGG_RS02115	pseudo-gene	NO NAME	alcohol dehydrogenase	228	250	258	245.333
LGG_RS02120	not predicted	NO NAME	hypothetical protein	158	189	127	158
LGG_RS02125	LGG_00441	srtC1	sortase	2174	2334	2166	2224.67
LGG_RS02130	LGG_00442	spaA	pilus protein	22848	26368	22893	24036.3
LGG_RS02135	LGG_00443	spaB	pilus protein	11201	13319	12472	12330.7
LGG_RS02140	LGG_00444	spaC	pilus protein	58934	68194	67388	64838.7
LGG_RS02145	LGG_00445	is15	transposase	0	0	0	0
LGG_RS02150	LGG_00446	NO NAME	hypothetical protein	81	77	55	71
LGG_RS02155	pseudo-gene	NO NAME	hypothetical protein	260	247	174	227
LGG_RS02160	LGG_00449	NO NAME	helicase UvrD	419	421	337	392.333
LGG_RS02165	LGG_00450	ybjD	hypothetical protein	233	296	268	265.667
LGG_RS02170	LGG_00451	is16	transposase	0	0	0	0
LGG_RS02175	LGG_00452	is17	transposase	24	25	23	24
LGG_RS02180	LGG_00453	is18	transposase	133	148	112	131
LGG_RS02185	LGG_00454	is19	integrase	82	98	83	87.6667
LGG_RS02190	LGG_00455	NO NAME	hypothetical protein	1400	1372	901	1224.33
LGG_RS02195	LGG_00456	pacL	magnesium-transporting ATPase	4467	5959	4194	4873.33
LGG_RS02200	LGG_00458	is21	transposase	16	24	6	15.3333
LGG_RS02205	LGG_00459	napA	sodium:proton antiporter	184	235	158	192.333
LGG_RS02210	LGG_00460	is22	transposase	6	5	4	5
LGG_RS02215	LGG_00462	is24	transposase	63	70	52	61.6667
LGG_RS02220	LGG_00463	eriC	ATP synthase F0 subunit A	105	141	124	123.333
LGG_RS02225	not predicted	NO NAME	transposase	46	49	32	42.3333
LGG_RS02230	LGG_00465	NO NAME	transporter	59	63	57	59.6667
LGG_RS02235	LGG_00466	is26	transposase	0	0	0	0
LGG_RS02240	LGG_00467	NO NAME	peptidase M20	70	74	66	70
LGG_RS02245	pseudo-gene	NO NAME	LysR family transcriptional regulator	46	53	26	41.6667
LGG_RS02250	LGG_00470	ebgA	beta-galactosidase	561	598	555	571.333
LGG_RS02255	LGG_00471	ygjI	amino acid permease	233	183	187	201
LGG_RS02260	LGG_00472	lysP	gamma-aminobutyrate permease	126	137	92	118.333
LGG_RS02265	LGG_00473	araC	AraC family transcriptional regulator	1126	671	979	925.333
LGG_RS02270	LGG_00474	NO NAME	transcriptional regulator	1083	377	856	772
LGG_RS02275	LGG_00475	NO NAME	transporter	60	43	56	53
LGG_RS02280	LGG_00476	abgB	peptidase M20	136	144	119	133
LGG_RS02285	LGG_00477	NO NAME	membrane protein	254	223	204	227
LGG_RS02290	LGG_00478	yecC	phosphate ABC transporter ATP-binding protein	117	148	101	122
LGG_RS02295	LGG_00479	NO NAME	amino acid ABC transporter substrate-binding protein	153	158	134	148.333
LGG_RS02300	LGG_00480	NO NAME	amino acid ABC transporter permease	67	78	64	69.6667
LGG_RS02305	LGG_00481	NO NAME	amino acid ABC transporter permease	64	81	56	67
LGG_RS02310	LGG_00482	NO NAME	hypothetical protein	20	26	24	23.3333
LGG_RS02315	LGG_00484	NO NAME	DNA-directed RNA polymerase subunit sigma-24	7	1	2	3.33333
LGG_RS02320	LGG_00486	NO NAME	lyzozyme M1 (1%2C4-beta-N-acetylmuramidase)	25	27	20	24
LGG_RS02325	LGG_00487	NO NAME	hypothetical protein	415	409	431	418.333
LGG_RS02330	LGG_00488	NO NAME	TetR family transcriptional regulator	115	139	100	118
LGG_RS02335	LGG_00489	NO NAME	ABC transporter permease	407	533	367	435.667
LGG_RS02340	LGG_00490	lolD	peptide ABC transporter ATP-binding protein	320	388	240	316
LGG_RS02345	LGG_00491	npr	NAD(FAD)-dependent dehydrogenase	37188	39189	28862	35079.7
LGG_RS02350	LGG_00492	NO NAME	haloacid dehalogenase	709	789	593	697
LGG_RS02355	LGG_00493	NO NAME	toxin	49	65	51	55
LGG_RS02360	LGG_00494	NO NAME	adenylyl transferase	245	269	218	244
LGG_RS02365	LGG_00495	NO NAME	hypothetical protein	9	11	4	8
LGG_RS02370	LGG_00496	NO NAME	hypothetical protein	6	6	8	6.66667
LGG_RS02375	LGG_00497	NO NAME	hypothetical protein	10	12	13	11.6667
LGG_RS02380	LGG_00499	is27	transposase	2	1	2	1.66667
LGG_RS02385	not predicted	NO NAME	hypothetical protein	17	22	19	19.3333
LGG_RS02390	LGG_00500	metQ	metal ABC transporter substrate-binding protein	20	12	12	14.6667
LGG_RS02395	LGG_00501	NO NAME	choloylglycine hydrolase	4401	5145	4501	4682.33
LGG_RS02400	LGG_00502	NO NAME	hypothetical protein	295	315	290	300
LGG_RS02405	LGG_00503	NO NAME	isomerase	4128	3964	3904	3998.67
LGG_RS02410	LGG_00505	NO NAME	transcriptional regulator	6386	6837	6534	6585.67
LGG_RS02415	LGG_00506	NO NAME	dihydroxyacetone kinase	8078	8626	8301	8335
LGG_RS02420	LGG_00508	dhaL	dihydroxyacetone kinase	11126	11927	11350	11467.7
LGG_RS02425	LGG_00509	dhaK	dihydroxyacetone kinase subunit DhaK	13726	15295	16314	15111.7
LGG_RS02430	LGG_00510	NO NAME	dihydroneopterin aldolase	4032	2591	3187	3270
LGG_RS02435	LGG_00511	NO NAME	ABC transporter ATP-binding protein	125	116	123	121.333
LGG_RS02440	LGG_00512	NO NAME	ABC transporter	72	50	47	56.3333
LGG_RS02445	LGG_00513	is28	transposase	4	5	4	4.33333
LGG_RS02450	LGG_00514	NO NAME	hypothetical protein	57	63	49	56.3333
LGG_RS02455	LGG_00516	NO NAME	hypothetical protein	78	96	85	86.3333
LGG_RS02460	LGG_00517	is29	transposase	12	5	6	7.66667
LGG_RS02465	not predicted	NO NAME	hypothetical protein	105	100	81	95.3333
LGG_RS02470	LGG_00518	NO NAME	DNA polymerase III subunit alpha	982	986	767	911.667
LGG_RS02475	LGG_00519	NO NAME	DNA-damage-inducible protein J	83	60	64	69
LGG_RS02480	LGG_00520	yceK	ArsR family transcriptional regulator	1363	1145	879	1129
LGG_RS02485	LGG_00521	yceJ	MFS transporter permease	31	38	27	32
LGG_RS02490	LGG_00522	tag	3-methyladenine DNA glycosylase	319	394	339	350.667
LGG_RS02495	LGG_00523	NO NAME	hypothetical protein	232	257	214	234.333
LGG_RS02500	LGG_00524	fba	fructose-bisphosphate aldolase	25739	37807	20572	28039.3
LGG_RS02505	LGG_00525	cidC	pyruvate oxidase	20715	19992	18405	19704
LGG_RS02510	LGG_00526	NO NAME	hypothetical protein	523	603	389	505
LGG_RS02515	pseudo-gene	NO NAME	beta-lactamase	1043	1340	889	1090.67
LGG_RS02520	LGG_00529	NO NAME	hypothetical protein	149	75	74	99.3333
LGG_RS02525	LGG_00530	ykfB	L-alanine-DL-glutamate epimerase	244	273	166	227.667
LGG_RS02530	LGG_00532	NO NAME	SAM-dependent methyltransferase	529	572	413	504.667
LGG_RS02535	LGG_00533	radC	hypothetical protein	189	215	133	179
LGG_RS02540	LGG_00534	trpD	glutamine amidotransferase	595	664	450	569.667
LGG_RS02545	LGG_00535	NO NAME	hypothetical protein	73	120	105	99.3333
LGG_RS02550	LGG_00536	glnA	glutamine synthetase	1782	3548	1453	2261
LGG_RS02555	LGG_00538	NO NAME	hydrolase	4941	8296	4588	5941.67
LGG_RS02560	LGG_00539	NO NAME	amino acid transporter	4670	7279	3867	5272
LGG_RS02565	LGG_00540	merR	MerR family transcriptional regulator	469	574	432	491.667
LGG_RS02570	LGG_00541	ycgG	2%2C5-diketo-D-gluconic acid reductase	2108	2163	1890	2053.67
LGG_RS02575	LGG_00542	gor	NADPH:quinone reductase	845	832	779	818.667
LGG_RS02580	LGG_00543	ydeP	HxlR family transcriptional regulator	2085	2374	2081	2180
LGG_RS02585	LGG_00544	NO NAME	membrane protein	91	101	84	92
LGG_RS02590	LGG_00545	NO NAME	ABC transporter permease	161	187	106	151.333
LGG_RS02595	LGG_00546	natA	ABC transporter ATP-binding protein	204	197	142	181
LGG_RS02600	LGG_00547	NO NAME	ABC transporter ATP-binding protein	511	582	333	475.333
LGG_RS02605	LGG_00548	resD	two-component system response regulator	359	257	398	338
LGG_RS02610	LGG_00549	resE	signal transduction histidine kinase	2488	1887	2188	2187.67
LGG_RS02615	LGG_00550	mppX	ABC transporter ATP-binding protein	416	355	406	392.333
LGG_RS02620	LGG_00551	NO NAME	ABC transporter permease	296	252	325	291
LGG_RS02625	LGG_00552	NO NAME	hypothetical protein	82	88	100	90
LGG_RS02630	LGG_00554	pepN	aminopeptidase N	35012	41177	33120	36436.3
LGG_RS02635	LGG_00555	ycaM	transporter	745	990	782	839
LGG_RS02640	LGG_00557	xylP	sodium:solute symporter	3456	3910	3990	3785.33
LGG_RS02645	LGG_00558	NO NAME	membrane protein	2346	2236	2930	2504
LGG_RS02650	LGG_00559	NO NAME	LysR family transcriptional regulator	922	494	1018	811.333
LGG_RS02655	LGG_00561	NO NAME	isomerase	93	67	86	82
LGG_RS02660	LGG_00562	kduD	2-deoxy-D-gluconate 3-dehydrogenase	81	37	88	68.6667
LGG_RS02665	LGG_00563	NO NAME	hypothetical protein	15	3	6	8
LGG_RS02670	LGG_00564	aroE	shikimate 5-dehydrogenase	58	23	38	39.6667
LGG_RS02675	LGG_00565	yfkL	MFS transporter	70	51	55	58.6667
LGG_RS02680	LGG_00566	aroE	shikimate 5-dehydrogenase	46	55	33	44.6667
LGG_RS02685	LGG_00567	metA	homoserine O-succinyltransferase	1934	1891	1954	1926.33
LGG_RS02690	LGG_00568	cysK	cysteine synthase	1648	1712	1435	1598.33
LGG_RS02695	LGG_02945	tRNA-Arg	tRNA-Arg	21	20	14	18.3333
LGG_RS02700	LGG_00569	NO NAME	hypothetical protein	304	275	254	277.667
LGG_RS02705	LGG_00570	NO NAME	hypothetical protein	154	152	113	139.667
LGG_RS02710	LGG_00571	metC	cystathionine beta-lyase	802	907	721	810
LGG_RS02715	LGG_00572	fliY	amino acid ABC transporter substrate-binding protein	767	873	696	778.667
LGG_RS02720	LGG_00573	yecS	cysteine ABC transporter permease	562	593	387	514
LGG_RS02725	LGG_00574	NO NAME	hypothetical protein	3725	4023	3798	3848.67
LGG_RS02730	LGG_00575	brnQ	branched-chain amino acid transporter II carrier protein	1193	1397	749	1113
LGG_RS02735	LGG_00576	NO NAME	hypothetical protein	47	29	32	36
LGG_RS02740	LGG_00577	NO NAME	cell surface protein	39	41	39	39.6667
LGG_RS02745	LGG_00578	NO NAME	peptidase	21	17	20	19.3333
LGG_RS02750	LGG_00579	NO NAME	hypothetical protein	302	359	319	326.667
LGG_RS02755	not predicted	NO NAME	transposase	0	0	0	0
LGG_RS02760	LGG_00582	is31	transposase	84	94	97	91.6667
LGG_RS02765	LGG_00583	NO NAME	hypothetical protein	1246	1064	1035	1115
LGG_RS02770	LGG_00584	NO NAME	cell surface protein	774	501	613	629.333
LGG_RS02775	LGG_00585	NO NAME	cell surface protein	1250	713	944	969
LGG_RS02780	LGG_00587	NO NAME	hypothetical protein	2348	1126	1855	1776.33
LGG_RS02785	LGG_00588	yicL	peptide ABC transporter ATP-binding protein	401	456	287	381.333
LGG_RS02790	LGG_00589	NO NAME	hypothetical protein	0	0	0	0
LGG_RS02795	LGG_00590	NO NAME	ABC transporter permease	986	1130	564	893.333
LGG_RS02800	LGG_00591	CcmA5	ABC transporter	384	562	264	403.333
LGG_RS02805	LGG_00592	NO NAME	hypothetical protein	86	120	87	97.6667
LGG_RS02810	LGG_00593	is32	transposase	0	0	0	0
LGG_RS02815	LGG_00595	pdxK	pyridoxal kinase	569	860	642	690.333
LGG_RS02820	LGG_00596	metF	5%2C10-methylenetetrahydrofolate reductase	965	1202	848	1005
LGG_RS02825	LGG_00597	metE	5-methyltetrahydropteroyltriglutamate--homocysteine methyltransferase	1558	2040	1322	1640
LGG_RS02830	LGG_00598	lmrC	ABC transporter ATP-binding protein	1491	1434	1526	1483.67
LGG_RS02835	LGG_00599	lmrD	multidrug ABC transporter permease	2342	2427	2114	2294.33
LGG_RS02840	LGG_00600	oxlT	MFS transporter	17323	32024	21236	23527.7
LGG_RS02845	LGG_00601	treR	transcriptional regulator	7484	19187	37205	21292
LGG_RS02850	LGG_00602	treC	alpha-amylase	16817	41531	91713	50020.3
LGG_RS02855	LGG_00603	treB	PTS beta-glucoside transporter subunit IIABC	27050	51299	85913	54754
LGG_RS02860	LGG_00604	sstT	serine/threonine transporter SstT	475	542	412	476.333
LGG_RS02865	LGG_00605	bcaP	amino acid permease	630	502	388	506.667
LGG_RS02870	LGG_00606	ldh	L-lactate dehydrogenase	3329	1826	2477	2544
LGG_RS02875	LGG_00607	gdhA	glutamate dehydrogenase	286	261	192	246.333
LGG_RS02880	LGG_00608	cspA	cold-shock protein	32510	27850	19138	26499.3
LGG_RS02885	LGG_00610	NO NAME	hypothetical protein	375	297	379	350.333
LGG_RS02890	LGG_00611	NO NAME	dihydroneopterin aldolase	1057	940	703	900
LGG_RS02895	LGG_00612	lsa	ABC-F type ribosomal protection protein	457	519	418	464.667
LGG_RS02900	LGG_00614	ylbE	nucleoside-diphosphate sugar epimerase	7072	9045	7311	7809.33
LGG_RS02905	LGG_00615	yeaE	aldehyde oxidoreductase	6677	9426	7826	7976.33
LGG_RS02910	LGG_00616	proY	alanine glycine permease	2435	2468	2249	2384
LGG_RS02915	LGG_00617	NO NAME	hypothetical protein	22561	25058	21940	23186.3
LGG_RS02920	LGG_00618	NO NAME	sodium:proton antiporter	2496	2711	2331	2512.67
LGG_RS02925	LGG_00619	NO NAME	hypothetical protein	258	277	260	265
LGG_RS02930	LGG_00620	NO NAME	transcriptional regulator	233	223	227	227.667
LGG_RS02935	LGG_00621	cylB	multidrug ABC transporter permease	42	65	40	49
LGG_RS02940	LGG_00622	cylA	ABC transporter ATP-binding protein	49	54	47	50
LGG_RS02945	LGG_00623	NO NAME	alpha/beta hydrolase	1256	1435	1054	1248.33
LGG_RS02950	LGG_00624	cah	carbonic anhydrase	1069	1218	871	1052.67
LGG_RS02955	LGG_00625	ybjQ	hypothetical protein	1800	1832	1214	1615.33
LGG_RS02960	LGG_00627	NO NAME	NUDIX hydrolase	117	126	84	109
LGG_RS02965	LGG_00628	walR	two-component system response regulator	220	140	201	187
LGG_RS02970	LGG_00629	walK	two-component system sensor histidine kinase	266	135	250	217
LGG_RS02975	LGG_00630	ycbN	bacitracin ABC transporter ATP-binding protein	593	495	642	576.667
LGG_RS02980	LGG_00631	NO NAME	bacitracin ABC transporter permease	334	293	264	297
LGG_RS02985	LGG_00632	gor	NADPH:quinone reductase	365	290	228	294.333
LGG_RS02990	LGG_00633	amtB	ammonia permease	100	76	58	78
LGG_RS02995	LGG_00634	NO NAME	peroxidase	1550	1285	1112	1315.67
LGG_RS03000	LGG_00635	yhiD	methyltransferase	554	650	414	539.333
LGG_RS03005	LGG_00636	endA	XRE family transcriptional regulator	617	793	630	680
LGG_RS03010	LGG_00638	ybiT	heme ABC transporter ATP-binding protein	2243	2319	1607	2056.33
LGG_RS03015	pseudo-gene	NO NAME	DNA mismatch repair protein MutS	2295	2597	1888	2260
LGG_RS03020	LGG_00641	ysiD	uracil-DNA glycosylase	879	1003	673	851.667
LGG_RS03025	LGG_00642	glpF	glycerol transporter	638	318	283	413
LGG_RS03030	LGG_00643	glpD	alpha-glycerophosphate oxidase	2666	453	1186	1435
LGG_RS03035	LGG_00644	glpK	glycerol kinase	2016	319	867	1067.33
LGG_RS03040	LGG_00645	NO NAME	glycosyl transferase family 2	43	31	19	31
LGG_RS03045	LGG_00646	NO NAME	hypothetical protein	153	98	70	107
LGG_RS03050	LGG_00647	NO NAME	hypothetical protein	27	15	17	19.6667
LGG_RS03055	LGG_00648	lacT	transcription antiterminator lact	471	203	266	313.333
LGG_RS03060	LGG_00649	lacE	PTS lactose transporter subunit IIB	735	210	442	462.333
LGG_RS03065	pseudo-gene	NO NAME	6-phospho-beta-galactosidase	555	201	308	354.667
LGG_RS03070	LGG_00652	lacF	PTS lactose transporter subunit IIA	107	57	56	73.3333
LGG_RS03075	LGG_00653	galK	galactokinase	3442	1202	2933	2525.67
LGG_RS03080	LGG_00654	galE	UDP-glucose 4-epimerase	14715	13497	14508	14240
LGG_RS03085	LGG_00655	galT	peptidase S24	20005	18085	20168	19419.3
LGG_RS03090	LGG_00656	galR	transcriptional regulator	12505	11917	11363	11928.3
LGG_RS03095	LGG_00657	galM	aldose 1-epimerase	14310	14050	13465	13941.7
LGG_RS03100	LGG_00658	NO NAME	hypothetical protein	89	73	67	76.3333
LGG_RS03105	LGG_00659	pts	PTS glucitol transporter subunit IIA	259	167	159	195
LGG_RS03110	LGG_00660	NO NAME	hypothetical protein	28	32	30	30
LGG_RS03115	LGG_00661	NO NAME	hypothetical protein	779	809	727	771.667
LGG_RS03120	LGG_00662	NO NAME	serine hydrolase	2056	2542	2250	2282.67
LGG_RS03125	LGG_00663	NO NAME	hypothetical protein	1346	1788	1518	1550.67
LGG_RS03130	LGG_00664	lacC	tagatose-6-phosphate kinase	2052	2654	2262	2322.67
LGG_RS03135	LGG_00665	lacD	tagatose-bisphosphate aldolase	4670	4861	3983	4504.67
LGG_RS03140	LGG_00666	lacB	galactose-6-phosphate isomerase	2649	2950	2790	2796.33
LGG_RS03145	LGG_00667	lacA	galactose-6-phosphate isomerase	2171	2285	1984	2146.67
LGG_RS03150	LGG_00668	lacR	DeoR family transcriptional regulator	3089	3357	3177	3207.67
LGG_RS03155	LGG_00669	NO NAME	phosphatase	2675	2140	2339	2384.67
LGG_RS03160	LGG_00670	sbcD	exonuclease SbcD subunit D	825	1065	649	846.333
LGG_RS03165	LGG_00671	sbcC	DNA repair ATPase	4524	6042	4101	4889
LGG_RS03170	LGG_00675	hsp1	molecular chaperone	4468	5987	4306	4920.33
LGG_RS03175	LGG_00676	mutY	A/G-specific adenine glycosylase	892	1262	690	948
LGG_RS03180	LGG_00677	NO NAME	esterase	1622	1987	1381	1663.33
LGG_RS03185	LGG_00678	ywrO	NAD(P)H dehydrogenase	1026	1204	781	1003.67
LGG_RS03190	LGG_00679	NO NAME	hypothetical protein	342	487	420	416.333
LGG_RS03195	LGG_00680	NO NAME	hypothetical protein	1316	1425	1069	1270
LGG_RS03200	LGG_00681	thiD	phosphomethylpyrimidine kinase	10674	12088	9272	10678
LGG_RS03205	LGG_00682	NO NAME	hypothetical protein	13503	15936	12489	13976
LGG_RS03210	LGG_00683	NO NAME	hypothetical protein	7177	8242	6612	7343.67
LGG_RS03215	LGG_00684	ywnB	NADH-flavin reductase	894	933	661	829.333
LGG_RS03220	LGG_00685	bglX	beta-glucosidase	3698	4417	4011	4042
LGG_RS03225	LGG_00686	NO NAME	hypothetical protein	231	257	262	250
LGG_RS03230	LGG_00687	ABC-SBP	ABC transporter substrate-binding protein	72	68	64	68
LGG_RS03235	LGG_00689	ABC-SBP	ABC transporter substrate-binding protein	1128	1067	870	1021.67
LGG_RS03240	LGG_00690	ABC-MSP	ABC transporter permease	862	878	583	774.333
LGG_RS03245	LGG_00691	thiQ	ABC transporter ATP-binding protein	1081	1038	690	936.333
LGG_RS03250	LGG_00692	yhdH	NADPH:quinone reductase	1135	1292	1097	1174.67
LGG_RS03255	LGG_00693	pacL	metal ABC transporter ATPase	102	106	85	97.6667
LGG_RS03260	LGG_00695	gtrB	glycosyltransferase	88	103	70	87
LGG_RS03265	LGG_00696	ykcB	4-amino-4-deoxy-L-arabinose transferase	141	181	146	156
LGG_RS03270	LGG_00697	NO NAME	membrane protein	27	33	25	28.3333
LGG_RS03275	LGG_00700	phoP1	two-component system response regulator	555	559	667	593.667
LGG_RS03280	LGG_00701	phoR1	two-component system sensor histidine kinase	1034	1111	959	1034.67
LGG_RS03285	LGG_00702	NO NAME	hypothetical protein	645	430	491	522
LGG_RS03290	LGG_00703	NO NAME	polyketide synthase	1259	808	989	1018.67
LGG_RS03295	LGG_00704	NO NAME	short-chain dehydrogenase	83	44	47	58
LGG_RS03300	LGG_00705	adc	acetoacetate decarboxylase	89	39	50	59.3333
LGG_RS03305	LGG_00706	ydgI	NAD(P)H-dependent quinone reductase	3745	2192	3368	3101.67
LGG_RS03310	LGG_00707	lctO	L-lactate oxidase	5436	2911	4459	4268.67
LGG_RS03315	LGG_03001	tRNA-Ala	tRNA-Ala	55	45	20	40
LGG_RS03320	LGG_03000	tRNA-Ala	tRNA-Ala	47	75	25	49
LGG_RS03325	LGG_00708	NO NAME	hypothetical protein	800	1338	911	1016.33
LGG_RS03330	LGG_00709	ydaF	PadR family transcriptional regulator	310	442	371	374.333
LGG_RS03335	LGG_00710	ygbF	membrane protein	907	1482	986	1125
LGG_RS03340	LGG_00711	NO NAME	hypothetical protein	581	827	522	643.333
LGG_RS03345	LGG_00712	gor	NADPH:quinone reductase	1826	2340	1568	1911.33
LGG_RS03350	LGG_00713	NO NAME	hypothetical protein	436	523	357	438.667
LGG_RS03355	LGG_00714	NO NAME	hypothetical protein	1040	1095	836	990.333
LGG_RS03360	LGG_00715	yubA	membrane protein	1854	2385	1631	1956.67
LGG_RS03365	LGG_00716	NO NAME	hypothetical protein	213	115	94	140.667
LGG_RS03370	LGG_00717	lexA	LexA family transcriptional regulator	1534	1604	1312	1483.33
LGG_RS03375	LGG_00718	NO NAME	hypothetical protein	1660	1934	1408	1667.33
LGG_RS03380	LGG_00719	mleP	malate transporter	2416	2923	2083	2474
LGG_RS03385	LGG_00720	ywrF	hypothetical protein	1662	2054	1544	1753.33
LGG_RS03390	LGG_00721	NO NAME	hypothetical protein	4160	4770	4086	4338.67
LGG_RS03395	LGG_00722	fthC	5-formyltetrahydrofolate cyclo-ligase	4176	4732	3798	4235.33
LGG_RS03400	LGG_00723	yeaO	hypothetical protein	2334	2748	2496	2526
LGG_RS03405	LGG_00724	NO NAME	Mg2+ and Co2+ transporter protein	993	1131	920	1014.67
LGG_RS03410	LGG_00725	mleR	LysR family transcriptional regulator	851	1122	792	921.667
LGG_RS03415	LGG_00726	sfcA	malate dehydrogenase	372	309	187	289.333
LGG_RS03420	LGG_00727	mleP	malate permease	238	171	123	177.333
LGG_RS03425	LGG_00728	tpx	thiol peroxidase	2598	2851	2514	2654.33
LGG_RS03430	LGG_00729	NO NAME	flavodoxin	78	65	63	68.6667
LGG_RS03435	LGG_00730	NO NAME	transcriptional regulator	169	178	131	159.333
LGG_RS03440	LGG_00731	NO NAME	multidrug ABC transporter ATP-binding protein	342	401	324	355.667
LGG_RS03445	LGG_00732	pepF	oligoendopeptidase F	2608	3354	2449	2803.67
LGG_RS03450	LGG_00733	ndk	nucleoside diphosphate kinase	3492	3873	2983	3449.33
LGG_RS03455	LGG_00734	NO NAME	hypothetical protein	2682	3038	2779	2833
LGG_RS03460	LGG_00735	ctpE	magnesium-transporting ATPase	10654	12679	9402	10911.7
LGG_RS03465	LGG_00736	pepR	prolyl aminopeptidase	3496	3606	3521	3541
LGG_RS03470	LGG_00737	NO NAME	hypothetical protein	3617	3436	3426	3493
LGG_RS03475	LGG_00738	wecD	acetyltransferase	2528	2552	2527	2535.67
LGG_RS03480	LGG_00739	napA	sodium:proton antiporter	6480	6861	5530	6290.33
LGG_RS03485	LGG_00740	gph	haloacid dehalogenase	5261	5516	4392	5056.33
LGG_RS03490	LGG_00741	NO NAME	MarR family transcriptional regulator	2149	2272	1804	2075
LGG_RS03495	LGG_00742	ybcH	alpha/beta hydrolase	3453	3971	3391	3605
LGG_RS03500	LGG_00743	nrdI	flavoprotein	3106	3609	3301	3338.67
LGG_RS03505	LGG_00744	dkgA	2%2C5-diketo-D-gluconic acid reductase	12836	13983	14388	13735.7
LGG_RS03510	LGG_00745	NO NAME	hypothetical protein	481	600	588	556.333
LGG_RS03515	LGG_00746	NO NAME	alpha/beta hydrolase	1314	1707	1356	1459
LGG_RS03520	LGG_00747	yviA	membrane protein	931	1249	1076	1085.33
LGG_RS03525	LGG_00748	NO NAME	hypothetical protein	562	684	608	618
LGG_RS03530	LGG_00749	metE	hypothetical protein	1519	1687	1165	1457
LGG_RS03535	LGG_00750	luxS	S-ribosylhomocysteinase	15238	16522	14173	15311
LGG_RS03540	LGG_00751	yjbF	membrane protein	1769	1914	1830	1837.67
LGG_RS03545	LGG_00752	ruvA	Holliday junction DNA helicase RuvA	2161	2248	1989	2132.67
LGG_RS03550	LGG_00753	ruvB	Holliday junction DNA helicase RuvB	5038	5364	4461	4954.33
LGG_RS03555	LGG_00754	queA	S-adenosylmethionine:tRNA ribosyltransferase-isomerase	7483	7714	6264	7153.67
LGG_RS03560	LGG_00755	tgt	queuine tRNA-ribosyltransferase	1983	2076	1619	1892.67
LGG_RS03565	LGG_00756	yajC	preprotein translocase subunit YajC	3092	3225	2252	2856.33
LGG_RS03570	LGG_00757	adhE	bifunctional acetaldehyde-CoA/alcohol dehydrogenase	7041	8479	6623	7381
LGG_RS03575	LGG_00759	sirR	Cro/Cl family transcriptional regulator	3227	3638	2524	3129.67
LGG_RS03580	LGG_00760	zwf	glucose-6-phosphate 1-dehydrogenase	8782	10171	6666	8539.67
LGG_RS03585	LGG_00761	dinB	DNA polymerase IV	1523	1502	1221	1415.33
LGG_RS03590	LGG_00762	ytoI	thioesterase	5253	5087	4580	4973.33
LGG_RS03595	LGG_00763	ytqI	phosphoesterase	4407	4505	4652	4521.33
LGG_RS03600	LGG_00764	rheB	DEAD/DEAH box helicase	9752	10527	9997	10092
LGG_RS03605	LGG_00765	NO NAME	hypothetical protein	5553	6011	4802	5455.33
LGG_RS03610	LGG_00766	NO NAME	hypothetical protein	1179	1243	973	1131.67
LGG_RS03615	LGG_00767	alaS	alanyl-tRNA synthetase	19877	20568	18359	19601.3
LGG_RS03620	LGG_00768	NO NAME	hypothetical protein	1201	780	824	935
LGG_RS03625	LGG_00769	alaRS	hypothetical protein	2465	2320	2340	2375
LGG_RS03630	LGG_00770	ruvX	Holliday junction DNA helicase	3521	3596	3242	3453
LGG_RS03635	LGG_00771	ybeC	hypothetical protein	2631	2600	2111	2447.33
LGG_RS03640	LGG_00772	NO NAME	cell division protein FtsZ	659	695	729	694.333
LGG_RS03645	LGG_00773	NO NAME	colicin V biosynthesis protein	1677	1736	1348	1587
LGG_RS03650	LGG_00774	mutS	DNA mismatch repair protein MutS	9597	9270	7962	8943
LGG_RS03655	LGG_00775	trxA	thioredoxin	4384	3856	3436	3892
LGG_RS03660	LGG_00776	dltX	cytochrome C553	2274	3378	2873	2841.67
LGG_RS03665	LGG_00777	dltA	D-alanine--poly(phosphoribitol) ligase subunit 1	14519	23917	12997	17144.3
LGG_RS03670	LGG_00778	dltB	D-alanyl-lipoteichoic acid biosynthesis protein DltB	7777	13114	6994	9295
LGG_RS03675	LGG_00779	dltC	D-alanine--poly(phosphoribitol) ligase subunit 2	2454	3930	2706	3030
LGG_RS03680	LGG_00780	dltD	cytochrome C552	7442	10620	7317	8459.67
LGG_RS03685	LGG_00781	yslB	yslB protein	1122	923	736	927
LGG_RS03690	LGG_00782	murI	glutamate racemase	3404	3732	3096	3410.67
LGG_RS03695	LGG_00783	xerD	phosphodiesterase	1115	1278	930	1107.67
LGG_RS03700	LGG_00784	glpF	glycerol uptake permease	620	578	412	536.667
LGG_RS03705	LGG_00785	ykuL	hypothetical protein	1749	1794	1337	1626.67
LGG_RS03710	LGG_00786	NO NAME	membrane protein	1437	1604	1158	1399.67
LGG_RS03715	LGG_00787	NO NAME	mechanosensitive ion channel protein MscS	1172	1387	1081	1213.33
LGG_RS03720	LGG_00789	NO NAME	chemotaxis protein	4156	3820	4939	4305
LGG_RS03725	LGG_00790	NO NAME	hypothetical protein	4234	4158	4285	4225.67
LGG_RS03730	LGG_00791	yrxA	transcriptional regulator	2298	2367	2170	2278.33
LGG_RS03735	LGG_00792	pepQ	dipeptidase	8246	9067	7951	8421.33
LGG_RS03740	LGG_00793	ccpA	catabolite control protein A	7645	4275	4421	5447
LGG_RS03745	LGG_00794	pbp1B	carboxypeptidase	5777	6605	5282	5888
LGG_RS03750	LGG_00796	yfnB	haloacid dehalogenase	3075	3478	2587	3046.67
LGG_RS03755	LGG_00797	birA	biotin--[acetyl-CoA-carboxylase] synthetase	3002	3642	2426	3023.33
LGG_RS03760	LGG_00798	pepV	dipeptidase PepV	8013	9582	6990	8195
LGG_RS03765	LGG_00799	NO NAME	glycerophosphoryl diester phosphodiesterase	1733	2098	1460	1763.67
LGG_RS03770	LGG_00800	NO NAME	hypothetical protein	258	293	236	262.333
LGG_RS03775	LGG_00801	NO NAME	membrane protein	1372	1371	1240	1327.67
LGG_RS03780	LGG_00802	NO NAME	membrane protein	940	980	808	909.333
LGG_RS03785	LGG_00803	NO NAME	metallophosphatase	1808	1920	1561	1763
LGG_RS03790	LGG_00804	yunD	5'-nucleotidase	5668	6272	5084	5674.67
LGG_RS03795	LGG_00805	yutD	transcriptional regulator	4341	4751	4402	4498
LGG_RS03800	LGG_00806	nagD	haloacid dehalogenase	4575	5281	4620	4825.33
LGG_RS03805	LGG_00807	NO NAME	membrane protein	1799	2023	1478	1766.67
LGG_RS03810	LGG_00808	dedA	membrane protein	3964	4431	3109	3834.67
LGG_RS03815	LGG_00809	ltrC	hypothetical protein	2618	3178	2141	2645.67
LGG_RS03820	LGG_00810	trxB	ferredoxin--NADP reductase	3851	4418	3330	3866.33
LGG_RS03825	LGG_00811	ppiB	peptidyl-prolyl cis-trans isomerase	937	967	603	835.667
LGG_RS03830	LGG_00812	yugI	general stress protein	2604	2416	1702	2240.67
LGG_RS03835	LGG_03015	16S rRNA	16S ribosomal RNA	0	0	0	0
LGG_RS03840	LGG_03005	23S rRNA	23S ribosomal RNA	0	0	0	0
LGG_RS03845	LGG_03010	5S rRNA	5S ribosomal RNA	0	0	0	0
LGG_RS03850	LGG_02946	tRNA-Val	tRNA-Val	0	0	0	0
LGG_RS03855	LGG_02947	tRNA-Lys	tRNA-Lys	122	116	89	109
LGG_RS03860	LGG_02948	tRNA-Thr	tRNA-Thr	396	268	252	305.333
LGG_RS03865	LGG_02949	tRNA-Gly	tRNA-Gly	232	185	129	182
LGG_RS03870	LGG_02950	tRNA-Arg	tRNA-Arg	115	111	91	105.667
LGG_RS03875	LGG_02951	tRNA-Pro	tRNA-Pro	11	4	1	5.33333
LGG_RS03880	LGG_02952	tRNA-Met	tRNA-Met	32	28	14	24.6667
LGG_RS03885	LGG_02953	tRNA-Met	tRNA-Met	401	271	198	290
LGG_RS03890	LGG_02954	tRNA-Met	tRNA-Met	254	179	115	182.667
LGG_RS03895	LGG_02955	tRNA-Asp	tRNA-Asp	0	0	0	0
LGG_RS03900	LGG_02956	tRNA-Phe	tRNA-Phe	83	60	36	59.6667
LGG_RS03905	LGG_02957	tRNA-Gly	tRNA-Gly	34	20	13	22.3333
LGG_RS03910	LGG_02958	tRNA-Ile	tRNA-Ile	28	13	8	16.3333
LGG_RS03915	LGG_02959	tRNA-Ser	tRNA-Ser	61	45	24	43.3333
LGG_RS03920	LGG_02960	tRNA-Glu	tRNA-Glu	6	6	1	4.33333
LGG_RS03925	LGG_02961	tRNA-Ser	tRNA-Ser	23	22	9	18
LGG_RS03930	LGG_02962	tRNA-Met	tRNA-Met	0	0	0	0
LGG_RS03935	LGG_02963	tRNA-Asp	tRNA-Asp	54	30	33	39
LGG_RS03940	LGG_02964	tRNA-Phe	tRNA-Phe	79	63	41	61
LGG_RS03945	LGG_02965	tRNA-Tyr	tRNA-Tyr	1	2	1	1.33333
LGG_RS03950	LGG_02966	tRNA-Trp	tRNA-Trp	56	28	21	35
LGG_RS03955	LGG_02967	tRNA-His	tRNA-His	129	88	58	91.6667
LGG_RS03960	LGG_02968	tRNA-Gln	tRNA-Gln	38	35	16	29.6667
LGG_RS03965	LGG_02969	tRNA-Cys	tRNA-Cys	305	188	124	205.667
LGG_RS03970	LGG_02970	tRNA-Leu	tRNA-Leu	433	288	192	304.333
LGG_RS03975	LGG_00823	NO NAME	DNA-directed RNA polymerase sigma-70 factor	2012	1100	1284	1465.33
LGG_RS03980	LGG_00824	ybeC	amino acid:proton symporter	1594	1869	1185	1549.33
LGG_RS03985	LGG_00825	rfaG	glycosyl transferase	3602	3841	2411	3284.67
LGG_RS03990	LGG_00826	cpoA	glycosyltransferase	3982	4254	2717	3651
LGG_RS03995	LGG_00827	NO NAME	membrane protein	2044	2146	1379	1856.33
LGG_RS04000	LGG_00828	araT	aminotransferase A	3371	3515	2740	3208.67
LGG_RS04005	LGG_00829	ykuJ	hypothetical protein	2972	2579	2436	2662.33
LGG_RS04010	LGG_00830	ltaS	glycerol phosphate lipoteichoic acid synthase	7781	7789	6040	7203.33
LGG_RS04015	LGG_00831	perR	peptide ABC transporter substrate-binding protein	609	600	455	554.667
LGG_RS04020	LGG_03014	16S rRNA	16S ribosomal RNA	0	0	0	0
LGG_RS04025	LGG_03004	23S rRNA	23S ribosomal RNA	0	0	0	0
LGG_RS04030	LGG_03009	5S rRNA	5S ribosomal RNA	0	0	0	0
LGG_RS04035	LGG_02971	tRNA-Asn	tRNA-Asn	1	0	0	0.333333
LGG_RS04040	LGG_02972	tRNA-Ser	tRNA-Ser	37	26	14	25.6667
LGG_RS04045	LGG_02973	tRNA-Val	tRNA-Val	8	4	5	5.66667
LGG_RS04050	LGG_00841	NO NAME	hypothetical protein	482	515	399	465.333
LGG_RS04055	LGG_00842	metK	S-adenosylmethionine synthetase	10144	10750	8288	9727.33
LGG_RS04060	LGG_00843	mdr	multidrug MFS transporter	340	258	282	293.333
LGG_RS04065	LGG_00844	glnR	MerR family transcriptional regulator	194	214	204	204
LGG_RS04070	LGG_00845	lmrB	multidrug MFS transporter	417	591	372	460
LGG_RS04075	LGG_00846	NO NAME	hypothetical protein	471	567	452	496.667
LGG_RS04080	LGG_00847	NO NAME	phospholipid phosphatase	275	246	177	232.667
LGG_RS04085	LGG_00848	leuS	leucyl-tRNA synthetase	28601	29449	22179	26743
LGG_RS04090	LGG_00851	rfbX	transporter	5168	5436	4010	4871.33
LGG_RS04095	LGG_00852	rsuA	16S rRNA uridine-516 pseudouridylate synthase	4730	5332	3839	4633.67
LGG_RS04100	LGG_00853	yhcC	DNA-binding protein	1887	1892	1456	1745
LGG_RS04105	LGG_00854	ycfG	carbohydrate kinase	5915	7357	6474	6582
LGG_RS04110	LGG_00855	NO NAME	NUDIX hydrolase	3867	4581	4249	4232.33
LGG_RS04115	LGG_02999	tRNA-Leu	tRNA-Leu	14	16	7	12.3333
LGG_RS04120	LGG_00856	bsaA	glutathione peroxidase	434	398	368	400
LGG_RS04125	LGG_00857	malY	aminotransferase	1398	1270	959	1209
LGG_RS04130	pseudo-gene	NO NAME	phosphohydrolase	1585	2048	1815	1816
LGG_RS04135	LGG_00860	gcvR	hypothetical protein	349	431	286	355.333
LGG_RS04140	LGG_00861	NO NAME	hypothetical protein	3403	3893	2653	3316.33
LGG_RS04145	LGG_00862	coiA	competence protein	370	397	298	355
LGG_RS04150	LGG_00863	NO NAME	dihydroorotate dehydrogenase	1398	1318	885	1200.33
LGG_RS04155	LGG_00864	NO NAME	adenylate cyclase	719	714	505	646
LGG_RS04160	LGG_00865	relA	GTP pyrophosphokinase	1766	2098	1638	1834
LGG_RS04165	LGG_00866	ppnK	inorganic polyphosphate/ATP-NAD kinase	2210	2516	1975	2233.67
LGG_RS04170	LGG_00867	rluD	pseudouridine synthase	2085	2326	1794	2068.33
LGG_RS04175	LGG_00868	apbE	thiamine biosynthesis protein	2300	2602	1948	2283.33
LGG_RS04180	LGG_00869	cutC	copper homeostasis protein CutC	2958	3144	2204	2768.67
LGG_RS04185	LGG_00870	bacA	UDP-diphosphatase	2798	2911	2070	2593
LGG_RS04190	LGG_00871	ykgB	hypothetical protein	3973	4292	3117	3794
LGG_RS04195	LGG_00872	pts	PTS glucose transporter subunit IIABC	1962	1938	1516	1805.33
LGG_RS04200	LGG_00873	rpsN	30S ribosomal protein S14	2651	3751	2779	3060.33
LGG_RS04205	LGG_00874	guaC	GMP reductase	7122	12313	10180	9871.67
LGG_RS04210	LGG_00875	corA	magnesium transporter	1088	1192	1036	1105.33
LGG_RS04215	LGG_00876	rrmA	SAM-dependent methyltransferase	311	293	232	278.667
LGG_RS04220	LGG_00878	cspR	RNA methyltransferase	2540	2894	2094	2509.33
LGG_RS04225	LGG_00879	yqaD	hypothetical protein	3959	4779	3925	4221
LGG_RS04230	LGG_00882	ftsK	cell division protein FtsK	9137	10130	7144	8803.67
LGG_RS04235	LGG_00883	NO NAME	Zn-dependent peptidase	4887	5061	3805	4584.33
LGG_RS04240	LGG_00884	ymfH	zinc protease	4876	5105	3766	4582.33
LGG_RS04245	LGG_00885	fabG	3-oxoacyl-ACP reductase	2437	2417	1861	2238.33
LGG_RS04250	LGG_00886	NO NAME	XRE family transcriptional regulator	9747	11594	8766	10035.7
LGG_RS04255	LGG_00887	pgsA	CDP-diacylglycerol--glycerol-3-phosphate 3-phosphatidyltransferase	5667	6609	4776	5684
LGG_RS04260	LGG_00888	cinA	damage-inducible protein A	2571	3030	3426	3009
LGG_RS04265	LGG_00889	recA	recombinase RecA	2324	2758	3305	2795.67
LGG_RS04270	LGG_00892	cvfA	ribonuclease	18693	20297	19548	19512.7
LGG_RS04275	LGG_00893	yigZ	hypothetical protein	697	748	562	669
LGG_RS04280	LGG_00894	comFA	competence protein ComF	38	45	32	38.3333
LGG_RS04285	not predicted	NO NAME	competence protein ComF	17	13	9	13
LGG_RS04290	LGG_00896	yfiA	sigma-54 modulation protein	8878	8566	8191	8545
LGG_RS04295	LGG_00899	secA	preprotein translocase subunit SecA	40262	40408	31265	37311.7
LGG_RS04300	LGG_00900	prfB	peptide chain release factor 2	10957	10454	7666	9692.33
LGG_RS04305	LGG_00901	ftsE	cell division protein FtsE	6023	5707	4535	5421.67
LGG_RS04310	LGG_00902	ftsX	cell division protein FtsX	5439	5187	4256	4960.67
LGG_RS04315	LGG_00903	NO NAME	cell division protein MinJ	3362	3684	2740	3262
LGG_RS04320	LGG_00904	phoP2	two-component system response regulator	3318	3740	2830	3296
LGG_RS04325	LGG_00905	phoR2	signal transduction histidine kinase	3544	4119	3552	3738.33
LGG_RS04330	LGG_00906	pstS	phosphate-binding protein	1952	2400	2185	2179
LGG_RS04335	LGG_00907	pstC	phosphate ABC transporter permease	2789	3676	3134	3199.67
LGG_RS04340	LGG_00908	pstA	phosphate ABC transporter permease	2700	3518	2752	2990
LGG_RS04345	LGG_00909	pstB	phosphate ABC transporter ATP-binding protein	4322	5942	4587	4950.33
LGG_RS04350	LGG_00910	pstB	phosphate ABC transporter ATP-binding protein	4675	6122	5046	5281
LGG_RS04355	LGG_00911	phoU	PhoU family transcriptional regulator	4077	5236	4135	4482.67
LGG_RS04360	LGG_00912	is33	transposase	170	230	190	196.667
LGG_RS04365	LGG_00913	is34	transposase	83	75	87	81.6667
LGG_RS04370	LGG_00914	NO NAME	hypothetical protein	6608	8248	6813	7223
LGG_RS04375	LGG_00915	NO NAME	hypothetical protein	442	534	355	443.667
LGG_RS04380	LGG_00916	NO NAME	membrane protein	1155	1471	1028	1218
LGG_RS04385	LGG_00917	hprK	HPr kinase/phosphorylase	7854	7962	6870	7562
LGG_RS04390	LGG_00918	lgt	prolipoprotein diacylglyceryl transferase	8287	8646	7676	8203
LGG_RS04395	LGG_00919	gpsA	glycerol-3-phosphate dehydrogenase	12072	12208	10426	11568.7
LGG_RS04400	LGG_00920	trxB	thioredoxin reductase	18637	19410	15831	17959.3
LGG_RS04405	LGG_00921	pgm	phosphoglucomutase	44841	37347	36226	39471.3
LGG_RS04410	LGG_00922	NO NAME	hydrolase	2475	2187	1969	2210.33
LGG_RS04415	LGG_00923	uvrB	excinuclease ABC subunit B	8123	8041	6812	7658.67
LGG_RS04420	LGG_00924	uvrA	excinuclease ABC subunit A	10173	10388	8164	9575
LGG_RS04425	LGG_00925	NO NAME	membrane protein	1942	2222	1674	1946
LGG_RS04430	LGG_00927	NO NAME	ATPase P	5487	6601	5892	5993.33
LGG_RS04435	LGG_00928	yvcK	hypothetical protein	8799	10209	9168	9392
LGG_RS04440	LGG_00929	yvcL	sporulation regulator WhiA	5697	6714	5615	6008.67
LGG_RS04445	LGG_00930	ohrR	MarR family transcriptional regulator	3744	3585	2975	3434.67
LGG_RS04450	LGG_00931	clpP	ATP-dependent Clp protease proteolytic subunit	20823	23030	22534	22129
LGG_RS04455	LGG_02974	tRNA-Arg	tRNA-Arg	518	444	416	459.333
LGG_RS04460	LGG_00932	cggR	SorC family transcriptional regulator	29600	41422	38296	36439.3
LGG_RS04465	LGG_00933	gapA	glyceraldehyde-3-phosphate dehydrogenase	529346	536976	405028	490450
LGG_RS04470	LGG_00934	pgk	phosphoglycerate kinase	382104	383245	289125	351491
LGG_RS04475	LGG_00935	tpiA	triosephosphate isomerase	311210	309096	261716	294007
LGG_RS04480	LGG_00936	eno	enolase	609326	605205	470594	561708
LGG_RS04485	LGG_00937	NO NAME	hypothetical protein	873	872	893	879.333
LGG_RS04490	LGG_00938	eriC	ATP synthase F0 subunit A	3043	2971	3023	3012.33
LGG_RS04495	LGG_00939	NO NAME	hypothetical protein	890	833	813	845.333
LGG_RS04500	LGG_00940	secG	preprotein translocase subunit SecG	1878	1668	2115	1887
LGG_RS04505	LGG_00941	yvaK	esterase	2558	2379	2575	2504
LGG_RS04510	LGG_00942	rnr	exoribonuclease R	20399	20966	15141	18835.3
LGG_RS04515	LGG_00943	smpB	SsrA-binding protein	5223	5162	3854	4746.33
LGG_RS04520	LGG_00944	nplT	neopullulanase	1719	1674	1558	1650.33
LGG_RS04525	LGG_00945	mapA	maltose phosphorylase	2497	2245	2257	2333
LGG_RS04530	LGG_00946	pgmB	beta-phosphoglucomutase	495	461	446	467.333
LGG_RS04535	LGG_00947	NO NAME	hypothetical protein	649	627	592	622.667
LGG_RS04540	LGG_00948	NO NAME	DNA-binding protein	524	460	329	437.667
LGG_RS04545	LGG_00949	NO NAME	MBL fold hydrolase	5002	6745	5172	5639.67
LGG_RS04550	LGG_00950	NO NAME	hypothetical protein	0	0	0	0
LGG_RS04555	LGG_00951	malE	ABC transporter substrate-binding protein	63662	73940	60975	66192.3
LGG_RS04560	LGG_00952	malF	sugar ABC transporter permease	33345	39173	27924	33480.7
LGG_RS04565	LGG_00953	malG	ABC transporter permease	30770	36081	24134	30328.3
LGG_RS04570	LGG_00954	malK	ABC transporter ATP-binding protein	35826	42163	31139	36376
LGG_RS04575	LGG_00955	NO NAME	GNAT family acetyltransferase	369	455	351	391.667
LGG_RS04580	LGG_00956	NO NAME	hypothetical protein	1450	1786	1595	1610.33
LGG_RS04585	LGG_00957	ycsE	haloacid dehalogenase	3644	4506	4440	4196.67
LGG_RS04590	LGG_00958	ung	uracil-DNA glycosylase	2890	3592	2868	3116.67
LGG_RS04595	LGG_00959	pta	phosphotransacetylase	11730	9088	9115	9977.67
LGG_RS04600	LGG_00960	yeeE	tRNA threonylcarbamoyladenosine biosynthesis protein TsaE	4696	2966	3354	3672
LGG_RS04605	LGG_00961	natA	sodium ABC transporter ATP-binding protein	2991	2870	2185	2682
LGG_RS04610	LGG_00962	natB	ABC transporter permease	4150	4437	2921	3836
LGG_RS04615	LGG_00963	dnaQ	DNA polymerase III subunit alpha	1328	1625	1225	1392.67
LGG_RS04620	LGG_00964	exoA	exodeoxyribonuclease III	1581	1856	1483	1640
LGG_RS04625	LGG_00965	NO NAME	hypothetical protein	0	0	0	0
LGG_RS04630	LGG_00966	murB	UDP-N-acetylenolpyruvoylglucosamine reductase	6773	7760	7263	7265.33
LGG_RS04635	LGG_00967	NO NAME	sodium:proton antiporter	3140	3712	3358	3403.33
LGG_RS04640	LGG_00968	NO NAME	Cro/Cl family transcriptional regulator	805	818	749	790.667
LGG_RS04645	LGG_00969	potA	spermidine/putrescine ABC transporter ATP-binding protein	1196	1193	942	1110.33
LGG_RS04650	LGG_00970	potB	spermidine/putrescine ABC transporter permease	633	577	507	572.333
LGG_RS04655	LGG_00971	potC	spermidine/purescine ABC transporter permease	702	675	637	671.333
LGG_RS04660	LGG_00972	potD	spermidine/putrescine ABC transporter substrate-binding protein	1137	1044	943	1041.33
LGG_RS04665	LGG_00973	NO NAME	hypothetical protein	621	498	533	550.667
LGG_RS04670	LGG_00974	NO NAME	hypothetical protein	309	284	224	272.333
LGG_RS04675	LGG_00975	NO NAME	hypothetical protein	145	128	106	126.333
LGG_RS04680	LGG_00976	pacL	haloacid dehalogenase	13025	15142	11931	13366
LGG_RS04685	LGG_00977	NO NAME	TetR family transcriptional regulator	593	827	605	675
LGG_RS04690	LGG_00978	NO NAME	ABC transporter permease	868	1293	1008	1056.33
LGG_RS04695	LGG_00979	yhiH	ABC transporter ATP-binding protein	503	666	522	563.667
LGG_RS04700	LGG_00980	ossG	membrane protein	2692	2748	2701	2713.67
LGG_RS04705	LGG_00981	NO NAME	hypothetical protein	5786	6580	6083	6149.67
LGG_RS04710	LGG_00982	glmM	phosphoglucosamine mutase	4822	5069	4676	4855.67
LGG_RS04715	LGG_00983	glmS	glucosamine--fructose-6-phosphate aminotransferase	50427	47561	14838	37608.7
LGG_RS04720	LGG_00984	pepF	oligoendopeptidase	17828	13533	20813	17391.3
LGG_RS04725	LGG_00985	NO NAME	membrane protein	340	255	209	268
LGG_RS04730	LGG_00986	yebC	transcriptional regulator	14062	15230	17909	15733.7
LGG_RS04735	LGG_00987	comGA	type II secretory pathway protein	81	84	68	77.6667
LGG_RS04740	LGG_00988	gomGB	type II secretion system protein F	130	137	119	128.667
LGG_RS04745	LGG_00989	gomGC	competence protein ComGC	15	25	35	25
LGG_RS04750	LGG_00990	NO NAME	competence protein ComGC	41	25	61	42.3333
LGG_RS04755	LGG_00991	NO NAME	hypothetical protein	11	18	14	14.3333
LGG_RS04760	LGG_00992	NO NAME	hypothetical protein	48	46	58	50.6667
LGG_RS04765	LGG_00993	NO NAME	hypothetical protein	34	46	54	44.6667
LGG_RS04770	LGG_00994	laaG	lactate dehydrogenase	6565	7348	6184	6699
LGG_RS04775	LGG_00995	NO NAME	hypothetical protein	642	741	489	624
LGG_RS04780	LGG_00996	cycA	alanine glycine permease	2065	2926	1819	2270
LGG_RS04785	LGG_00997	arbV	1-acyl-sn-glycerol-3-phosphate acyltransferase	1154	1734	956	1281.33
LGG_RS04790	LGG_00998	arbX	glycosyl transferase	806	1164	571	847
LGG_RS04795	LGG_00999	arbY	glycosyl transferase	1107	1451	887	1148.33
LGG_RS04800	LGG_01000	arbZ	1-acyl-sn-glycerol-3-phosphate acyltransferase	894	1101	735	910
LGG_RS04805	LGG_01001	galA	alpha-galactosidase	1403	1309	1481	1397.67
LGG_RS04810	LGG_01002	NO NAME	membrane protein	1792	2090	1917	1933
LGG_RS04815	LGG_01003	phoP3	two-component system response regulator	4634	5578	5242	5151.33
LGG_RS04820	LGG_01004	phoR3	two-component system sensor histidine kinase	8089	9660	8378	8709
LGG_RS04825	LGG_01005	NO NAME	acetyltransferase	2379	2844	2228	2483.67
LGG_RS04830	LGG_01006	NO NAME	hypothetical protein	530	537	421	496
LGG_RS04835	LGG_01007	pheB	hypothetical protein	914	865	727	835.333
LGG_RS04840	LGG_01008	NO NAME	hypothetical protein	852	880	672	801.333
LGG_RS04845	LGG_01009	NO NAME	acetyl-CoA carboxylase	70	95	82	82.3333
LGG_RS04850	LGG_01010	umuC	type VI secretion protein ImpB	285	343	263	297
LGG_RS04855	not predicted	NO NAME	hypothetical protein	804	932	683	806.333
LGG_RS04860	LGG_01012	NO NAME	membrane protein	2673	3353	2607	2877.67
LGG_RS04865	LGG_01013	NO NAME	lysophospholipase	1034	1268	936	1079.33
LGG_RS04870	LGG_01014	NO NAME	membrane protein	403	410	307	373.333
LGG_RS04875	LGG_01015	pcrA	ATP-dependent DNA helicase PcrA	7942	10484	6565	8330.33
LGG_RS04880	LGG_01016	ligA	NAD-dependent DNA ligase LigA	8702	10426	6331	8486.33
LGG_RS04885	LGG_01017	camS	CamS family sex pheromone protein	8457	9143	6833	8144.33
LGG_RS04890	LGG_01018	gatC	glutamyl-tRNA amidotransferase subunit C	6332	6558	5485	6125
LGG_RS04895	LGG_01019	gatA	aspartyl/glutamyl-tRNA amidotransferase subunit A	29692	32428	23287	28469
LGG_RS04900	LGG_01020	gatB	aspartyl/glutamyl-tRNA amidotransferase subunit B	32607	35208	25887	31234
LGG_RS04905	LGG_01021	yerQ	lipid kinase	4767	4393	5610	4923.33
LGG_RS04910	LGG_01022	rumA	RNA methyltransferase	7734	8123	6767	7541.33
LGG_RS04915	pseudo-gene	NO NAME	hypothetical protein	3071	3435	2781	3095.67
LGG_RS04920	LGG_01025	is36	transposase	0	0	0	0
LGG_RS04925	pseudo-gene	NO NAME	DNA methylase	799	798	659	752
LGG_RS04930	LGG_01027	res	type III restriction endonuclease StyLTI	908	908	613	809.667
LGG_RS04935	LGG_01029	is37	transposase	5	4	2	3.66667
LGG_RS04940	LGG_01030	yttB	MFS transporter permease	478	469	367	438
LGG_RS04945	LGG_01031	NO NAME	haloacid dehalogenase	701	825	583	703
LGG_RS04950	LGG_01032	murQ	hypothetical protein	2882	3066	2320	2756
LGG_RS04955	LGG_01033	pepO	endopeptidase	9679	10750	9223	9884
LGG_RS04960	LGG_01034	NO NAME	acetyltransferase	921	1267	876	1021.33
LGG_RS04965	LGG_01036	degV	hypothetical protein	2361	2779	2207	2449
LGG_RS04970	LGG_01037	hflC	hypothetical protein	3380	3991	3156	3509
LGG_RS04975	LGG_01038	NO NAME	hypothetical protein	987	1222	1188	1132.33
LGG_RS04980	LGG_01039	NO NAME	lyzozyme M1 (1%2C4-beta-N-acetylmuramidase)	430	534	299	421
LGG_RS04985	LGG_01040	NO NAME	hypothetical protein	2127	2265	1564	1985.33
LGG_RS04990	LGG_01042	NO NAME	hypothetical protein	638	707	507	617.333
LGG_RS04995	LGG_01043	ygjR	alanine-phosphoribitol ligase	4420	5010	3634	4354.67
LGG_RS05000	LGG_01044	rhe	helicase	5624	6997	5209	5943.33
LGG_RS05005	LGG_01045	pts	PTS cellobiose transporter subunit IIA	3425	3831	3125	3460.33
LGG_RS05010	LGG_01047	NO NAME	hypothetical protein	2651	3073	2408	2710.67
LGG_RS05015	LGG_02975	tRNA-Arg	tRNA-Arg	94	145	89	109.333
LGG_RS05020	LGG_01048	NO NAME	hypothetical protein	435	464	296	398.333
LGG_RS05025	LGG_01049	recQ	ATP-dependent DNA helicase RecQ	1472	1604	1086	1387.33
LGG_RS05030	LGG_01050	ampS	peptidase	760	847	566	724.333
LGG_RS05035	LGG_01051	NO NAME	TetR family transcriptional regulator	957	1005	846	936
LGG_RS05040	LGG_01053	NO NAME	hypothetical protein	2819	2981	2585	2795
LGG_RS05045	LGG_01054	NO NAME	hypothetical protein	653	642	483	592.667
LGG_RS05050	LGG_01055	fldA	flavodoxin	2281	2324	1650	2085
LGG_RS05055	LGG_01056	map	methionine aminopeptidase	5968	5944	4955	5622.33
LGG_RS05060	LGG_01057	NO NAME	glycosyl transferase family 2	5099	5490	5278	5289
LGG_RS05065	LGG_01059	NO NAME	hypothetical protein	442	503	324	423
LGG_RS05070	LGG_01060	NO NAME	hypothetical protein	569	663	455	562.333
LGG_RS05075	LGG_01061	mvaK	phosphomevalonate kinase	9885	9491	8078	9151.33
LGG_RS05080	LGG_01062	galU	UTP--glucose-1-phosphate uridylyltransferase	26720	25666	25718	26034.7
LGG_RS05085	LGG_01063	NO NAME	hypothetical protein	187	116	142	148.333
LGG_RS05090	LGG_01064	bglA	6-phospho-beta-glucosidase	97	57	60	71.3333
LGG_RS05095	LGG_01065	bglH	PTS beta-glucoside transporter subunit IIABC	64	38	38	46.6667
LGG_RS05100	LGG_01066	NO NAME	membrane protein	1394	1911	1496	1600.33
LGG_RS05105	LGG_01068	NO NAME	hypothetical protein	1157	1284	906	1115.67
LGG_RS05110	LGG_01069	gtrB	glucosyl transferase family 2	2532	3188	2182	2634
LGG_RS05115	LGG_01070	NO NAME	hypothetical protein	1529	1813	1462	1601.33
LGG_RS05120	LGG_01071	NO NAME	membrane protein	383	389	430	400.667
LGG_RS05125	LGG_01072	cspC	cold-shock protein	14314	12962	9339	12205
LGG_RS05130	LGG_01073	NO NAME	hypothetical protein	212	313	260	261.667
LGG_RS05135	LGG_01074	NO NAME	GNAT family acetyltransferase	716	935	762	804.333
LGG_RS05140	LGG_01075	acmA	N-acetylmuramidase	1055	1287	1079	1140.33
LGG_RS05145	LGG_01076	xpt	xanthine phosphoribosyltransferase	3251	5347	3730	4109.33
LGG_RS05150	LGG_01077	pbuX	xanthine permease	10118	16445	10374	12312.3
LGG_RS05155	LGG_01078	purK	phosphoribosylaminoimidazole carboxylase	12169	17897	11374	13813.3
LGG_RS05160	LGG_01079	purB	adenylosuccinate lyase	19536	23554	17413	20167.7
LGG_RS05165	LGG_01080	NO NAME	branched-chain amino acid ABC transporter ATP-binding protein	597	736	521	618
LGG_RS05170	LGG_01081	NO NAME	hypothetical protein	1069	1241	874	1061.33
LGG_RS05175	LGG_01082	ltaS	alkaline phosphatase	4316	5000	3394	4236.67
LGG_RS05180	LGG_01083	vanZ	glycopeptide antibiotics resistance protein	1252	1247	1117	1205.33
LGG_RS05185	LGG_01084	glcU	glucose transporter GlcU	2080	1835	1593	1836
LGG_RS05190	LGG_01085	pgi	glucose-6-phosphate isomerase	97049	96948	81915	91970.7
LGG_RS05195	LGG_01086	int	integrase	258	374	250	294
LGG_RS05200	LGG_01087	NO NAME	hypothetical protein	916	1005	800	907
LGG_RS05205	LGG_01088	NO NAME	hypothetical protein	5611	7372	6127	6370
LGG_RS05210	LGG_01089	NO NAME	hypothetical protein	1524	2014	1627	1721.67
LGG_RS05215	LGG_01090	NO NAME	pyridoxamine 5-phosphate oxidase	2920	3992	3273	3395
LGG_RS05220	LGG_01091	NO NAME	hypothetical protein	2255	2893	2557	2568.33
LGG_RS05225	LGG_01092	NO NAME	hypothetical protein	7000	9062	7766	7942.67
LGG_RS05230	LGG_01093	NO NAME	hypothetical protein	6480	8021	7464	7321.67
LGG_RS05235	LGG_01094	NO NAME	toxin	1962	2286	1990	2079.33
LGG_RS05240	LGG_01095	Cpg	Cro/Cl family transcriptional regulator	1255	1512	1401	1389.33
LGG_RS05245	LGG_01096	NO NAME	hypothetical protein	254	319	268	280.333
LGG_RS05250	not predicted	NO NAME	hypothetical protein	412	544	440	465.333
LGG_RS05255	LGG_01097	NO NAME	hypothetical protein	328	388	321	345.667
LGG_RS05260	LGG_01099	NO NAME	hypothetical protein	884	1221	1013	1039.33
LGG_RS05265	LGG_01100	NO NAME	hypothetical protein	169	239	181	196.333
LGG_RS05270	LGG_01102	NO NAME	hypothetical protein	171	226	181	192.667
LGG_RS05275	LGG_01103	NO NAME	hypothetical protein	193	207	240	213.333
LGG_RS05280	LGG_01104	NO NAME	DNA recombination protein RecT	765	1060	922	915.667
LGG_RS05285	LGG_01105	NO NAME	hypothetical protein	732	1038	927	899
LGG_RS05290	LGG_01106	NO NAME	phage protein	893	1270	1206	1123
LGG_RS05295	LGG_01107	ssb3	single-stranded DNA-binding protein	523	661	582	588.667
LGG_RS05300	LGG_01108	NO NAME	DNA-binding protein	212	265	207	228
LGG_RS05305	LGG_01109	NO NAME	DNA-binding protein	147	188	127	154
LGG_RS05310	LGG_01110	NO NAME	hypothetical protein	362	517	504	461
LGG_RS05315	LGG_01111	NO NAME	hypothetical protein	233	285	285	267.667
LGG_RS05320	LGG_01112	NO NAME	hypothetical protein	431	553	559	514.333
LGG_RS05325	LGG_01113	NO NAME	hypothetical protein	496	561	585	547.333
LGG_RS05330	LGG_01114	NO NAME	hypothetical protein	170	248	273	230.333
LGG_RS05335	LGG_01115	NO NAME	hypothetical protein	307	372	354	344.333
LGG_RS05340	LGG_01116	NO NAME	hypothetical protein	82	73	91	82
LGG_RS05345	not predicted	NO NAME	hypothetical protein	149	158	167	158
LGG_RS05350	not predicted	NO NAME	hypothetical protein	237	249	303	263
LGG_RS05355	LGG_01117	NO NAME	hypothetical protein	177	255	241	224.333
LGG_RS05360	LGG_01118	NO NAME	hypothetical protein	230	262	367	286.333
LGG_RS05365	not predicted	NO NAME	hypothetical protein	95	124	100	106.333
LGG_RS05370	LGG_01120	NO NAME	transcriptional regulator	287	354	366	335.667
LGG_RS05375	LGG_01121	NO NAME	hypothetical protein	225	296	292	271
LGG_RS05380	LGG_01122	NO NAME	endonuclease	123	159	168	150
LGG_RS05385	LGG_01123	NO NAME	ribonucleoside-diphosphate reductase	82	87	125	98
LGG_RS05390	LGG_01124	Rorf172	terminase	105	147	144	132
LGG_RS05395	LGG_01125	Rorf447	terminase	362	488	437	429
LGG_RS05400	LGG_01126	NO NAME	hypothetical protein	398	632	516	515.333
LGG_RS05405	LGG_01127	NO NAME	phage head morphogenesis protein	224	383	328	311.667
LGG_RS05410	LGG_01128	NO NAME	hypothetical protein	473	754	736	654.333
LGG_RS05415	LGG_01129	gpG	phage capsid protein	438	676	564	559.333
LGG_RS05420	LGG_01130	NO NAME	hypothetical protein	211	313	291	271.667
LGG_RS05425	LGG_01131	NO NAME	hypothetical protein	135	207	177	173
LGG_RS05430	LGG_01132	NO NAME	phage head-tail joining protein	120	216	159	165
LGG_RS05435	LGG_01133	NO NAME	hypothetical protein	265	380	381	342
LGG_RS05440	LGG_01134	NO NAME	phage tail protein	239	377	311	309
LGG_RS05445	LGG_01135	NO NAME	hypothetical protein	92	139	128	119.667
LGG_RS05450	LGG_01136	NO NAME	hypothetical protein	103	164	172	146.333
LGG_RS05455	LGG_01137	NO NAME	phage tail tape measure protein	441	660	622	574.333
LGG_RS05460	LGG_01138	NO NAME	phage tail protein	393	513	488	464.667
LGG_RS05465	LGG_01139	NO NAME	phage tail protein	442	616	514	524
LGG_RS05470	LGG_01140	NO NAME	phage infection protein	12	13	20	15
LGG_RS05475	LGG_01141	NO NAME	hypothetical protein	39	71	81	63.6667
LGG_RS05480	LGG_01142	hol	holin	57	86	78	73.6667
LGG_RS05485	LGG_01143	lys	1%2C4-beta-N-acetylmuramidase	215	258	249	240.667
LGG_RS05490	LGG_01144	ycnE	antibiotic biosynthesis monooxygenase	822	856	741	806.333
LGG_RS05495	LGG_01145	laaO	XRE family transcriptional regulator	722	958	804	828
LGG_RS05500	LGG_01146	NO NAME	hypothetical protein	574	722	666	654
LGG_RS05505	LGG_01147	NO NAME	glycosyltransferase	5162	5882	6009	5684.33
LGG_RS05510	LGG_01148	ysjB	alanine-phosphoribitol ligase	6497	6957	5624	6359.33
LGG_RS05515	LGG_01149	guaD	cytosine deaminase	3505	3902	3714	3707
LGG_RS05520	LGG_02976	tRNA-Glu	tRNA-Glu	698	615	496	603
LGG_RS05525	LGG_01150	NO NAME	hypothetical protein	69	102	66	79
LGG_RS05530	LGG_01151	NO NAME	hypothetical protein	125	128	87	113.333
LGG_RS05535	LGG_01152	NO NAME	hypothetical protein	928	840	692	820
LGG_RS05540	not predicted	NO NAME	transposase	401	410	273	361.333
LGG_RS05545	pseudo-gene	NO NAME	hypothetical protein	262	286	243	263.667
LGG_RS05550	LGG_01154	NO NAME	hypothetical protein	43	40	32	38.3333
LGG_RS05555	pseudo-gene	NO NAME	MFS transporter	1191	1348	800	1113
LGG_RS05560	LGG_01158	pepD	peptidase C69	9140	9815	6956	8637
LGG_RS05565	LGG_02977	tRNA-Gln	tRNA-Gln	77	63	48	62.6667
LGG_RS05570	LGG_01159	NO NAME	hypothetical protein	306	332	305	314.333
LGG_RS05575	LGG_01160	NO NAME	hypothetical protein	771	779	666	738.667
LGG_RS05580	LGG_01161	pgm	phosphoglycerate mutase	1306	1479	1166	1317
LGG_RS05585	LGG_01162	NO NAME	TetR family transcriptional regulator	1171	1257	1066	1164.67
LGG_RS05590	LGG_01163	ycfI	multidrug ABC transporter ATP-binding protein	3554	3888	2647	3363
LGG_RS05595	LGG_01164	yfiC	multidrug ABC transporter ATP-binding protein	5198	5537	4070	4935
LGG_RS05600	LGG_01165	NO NAME	FMN reductase	716	720	548	661.333
LGG_RS05605	LGG_01166	NO NAME	dioxygenase	306	300	229	278.333
LGG_RS05610	LGG_01167	ampC	serine hydrolase	1869	1934	1609	1804
LGG_RS05615	LGG_01168	murC	UDP-N-acetylmuramyl peptide synthase	6388	7163	5194	6248.33
LGG_RS05620	LGG_01169	tdk	thymidine kinase	1282	1351	1150	1261
LGG_RS05625	LGG_01171	prfA	peptide chain release factor 1	4597	5027	3979	4534.33
LGG_RS05630	LGG_01172	hemK	N5-glutamine S-adenosyl-L-methionine-dependent methyltransferase	2388	2655	1762	2268.33
LGG_RS05635	LGG_01173	sua	translation factor Sua5	3041	3524	2392	2985.67
LGG_RS05640	LGG_01174	glyA	serine hydroxymethyltransferase	9039	9387	8112	8846
LGG_RS05645	LGG_01175	upp	uracil phosphoribosyltransferase	9370	10124	7928	9140.67
LGG_RS05650	LGG_01177	atpB	F0F1 ATP synthase subunit A	75206	104832	86087	88708.3
LGG_RS05655	LGG_01178	atpE	F0F1 ATP synthase subunit C	11223	15676	10096	12331.7
LGG_RS05660	LGG_01179	atpF	F0F1 ATP synthase subunit B	42617	58146	40901	47221.3
LGG_RS05665	LGG_01180	atpH	ATP synthase subunit delta	76539	105280	90896	90905
LGG_RS05670	LGG_01181	atpA	F0F1 ATP synthase subunit alpha	204868	280405	226652	237308
LGG_RS05675	LGG_01182	atpG	F0F1 ATP synthase subunit gamma	98624	136019	114929	116524
LGG_RS05680	LGG_01184	atpD	F0F1 ATP synthase subunit beta	193795	251354	205228	216792
LGG_RS05685	LGG_01185	atpC	F0F1 ATP synthase subunit epsilon	49231	61977	48822	53343.3
LGG_RS05690	LGG_01187	ywzB	membrane protein	870	1029	934	944.333
LGG_RS05695	LGG_01188	mreB	rod shape-determining protein MreB	12534	14284	11717	12845
LGG_RS05700	LGG_01189	NO NAME	DNA-directed RNA polymerase subunit beta	1454	1568	1043	1355
LGG_RS05705	LGG_01190	NO NAME	membrane protein insertion efficiency factor YidD	3869	4515	3599	3994.33
LGG_RS05710	LGG_01191	NO NAME	hypothetical protein	2749	3150	2680	2859.67
LGG_RS05715	LGG_01192	rodA	cell division protein FtsW	9796	10650	9572	10006
LGG_RS05720	LGG_01193	gcsH2	glycine cleavage system protein H	3368	3573	2839	3260
LGG_RS05725	LGG_01194	dapE	succinyl-diaminopimelate desuccinylase	3000	3262	2075	2779
LGG_RS05730	LGG_01195	metQ	ABC transporter substrate-binding protein	205	259	202	222
LGG_RS05735	LGG_01196	metQ	ABC transporter substrate-binding protein	3278	3417	3309	3334.67
LGG_RS05740	LGG_01197	metN	methionine ABC transporter ATP-binding protein	3209	3446	2975	3210
LGG_RS05745	LGG_01198	metI	ABC transporter permease	1540	1524	1248	1437.33
LGG_RS05750	LGG_01199	sufC	Fe-S cluster assembly ATPase SufC	1968	1698	2512	2059.33
LGG_RS05755	LGG_01200	sufD	ABC transporter permease	3012	2439	4593	3348
LGG_RS05760	LGG_01201	sufS	cysteine desulfurase	6631	6484	6979	6698
LGG_RS05765	LGG_01202	sufA/nifU	FeS assembly scaffold SufA	2543	2700	2520	2587.67
LGG_RS05770	LGG_01203	sufB	Fe-S cluster assembly protein SufB	11066	11023	9932	10673.7
LGG_RS05775	LGG_01204	NO NAME	hypothetical protein	102	73	69	81.3333
LGG_RS05780	LGG_01205	NO NAME	hypothetical protein	196	205	181	194
LGG_RS05785	LGG_01206	NO NAME	membrane protein	908	928	717	851
LGG_RS05790	LGG_01207	NO NAME	XRE family transcriptional regulator	5210	5137	4375	4907.33
LGG_RS05795	LGG_01208	usp	universal stress protein UspA	5434	5335	5314	5361
LGG_RS05800	LGG_01209	NO NAME	hypothetical protein	468	368	375	403.667
LGG_RS05805	LGG_01211	cshA	recombinase RarA	1616	2006	1500	1707.33
LGG_RS05810	LGG_01213	NO NAME	glutamate--cysteine ligase	7140	7742	5831	6904.33
LGG_RS05815	LGG_01214	NO NAME	hypothetical protein	2528	2601	2051	2393.33
LGG_RS05820	LGG_01215	NO NAME	hypothetical protein	2114	2228	1704	2015.33
LGG_RS05825	LGG_01216	sdhB	serine dehydratase subunit beta	3821	3985	3646	3817.33
LGG_RS05830	LGG_01217	sdhA	serine dehydratase subunit alpha	2715	2651	2319	2561.67
LGG_RS05835	LGG_01218	pgm	phosphoglycerate mutase	2906	2949	2621	2825.33
LGG_RS05840	LGG_01219	msrA	peptide methionine sulfoxide reductase	346	349	427	374
LGG_RS05845	LGG_01220	NO NAME	short-chain dehydrogenase	303	379	337	339.667
LGG_RS05850	LGG_01221	NO NAME	membrane protein	1232	1950	1190	1457.33
LGG_RS05855	LGG_01222	dgk	deoxynucleoside kinase	1815	2986	1810	2203.67
LGG_RS05860	LGG_01223	hisK	histidinol phosphatase	1018	1223	845	1028.67
LGG_RS05865	LGG_01224	oppA	peptide ABC transporter substrate-binding protein	1672	2031	1881	1861.33
LGG_RS05870	LGG_01225	hpk1	two-component system sensor histidine kinase	984	1342	1186	1170.67
LGG_RS05875	LGG_01226	rr1	two-component system response regulator	733	971	922	875.333
LGG_RS05880	LGG_01227	bcrA	ABC transporter	679	772	916	789
LGG_RS05885	LGG_01228	NO NAME	ABC transporter	763	711	833	769
LGG_RS05890	LGG_01229	hypR	LysR family transcriptional regulator	201	225	198	208
LGG_RS05895	LGG_01230	yphH	cupin	295	287	282	288
LGG_RS05900	LGG_01231	pcaC	4-carboxymuconolactone decarboxylase	241	262	246	249.667
LGG_RS05905	LGG_01232	NO NAME	hypothetical protein	419	437	328	394.667
LGG_RS05910	LGG_01233	NO NAME	acetyltransferase	334	367	326	342.333
LGG_RS05915	LGG_01234	NO NAME	GNAT family acetyltransferase	308	330	199	279
LGG_RS05920	LGG_01235	NO NAME	hypothetical protein	506	525	401	477.333
LGG_RS05925	LGG_01236	NO NAME	hypothetical protein	713	801	604	706
LGG_RS05930	LGG_01237	desR	transcriptional regulator	884	1064	714	887.333
LGG_RS05935	LGG_01238	desK	two-component system sensor histidine kinase	1790	2171	1652	1871
LGG_RS05940	LGG_01239	NO NAME	multidrug ABC transporter permease	42	68	38	49.3333
LGG_RS05945	LGG_01240	yvfR	multidrug ABC transporter ATP-binding protein	78	78	48	68
LGG_RS05950	LGG_01241	NO NAME	hypothetical protein	1143	1313	1043	1166.33
LGG_RS05955	LGG_01242	NO NAME	hypothetical protein	2224	2832	2510	2522
LGG_RS05960	LGG_01243	NO NAME	chromosome segregation ATPase	5138	6120	5030	5429.33
LGG_RS05965	LGG_01244	NO NAME	hypothetical protein	1015	1067	856	979.333
LGG_RS05975	LGG_01245	NO NAME	hypothetical protein	807	826	659	764
LGG_RS05980	LGG_01246	NO NAME	hypothetical protein	729	838	545	704
LGG_RS05985	LGG_01247	NO NAME	hypothetical protein	699	731	595	675
LGG_RS05990	not predicted	NO NAME	hypothetical protein	173	187	182	180.667
LGG_RS05995	LGG_01248	is39	transposase	4	1	2	2.33333
LGG_RS06000	LGG_01249	tex	S1 RNA-binding protein	1014	1239	803	1018.67
LGG_RS06005	LGG_01250	NO NAME	hypothetical protein	2118	1434	1155	1569
LGG_RS06010	LGG_01251	radC	glutamine amidotransferase	483	520	347	450
LGG_RS06015	LGG_01252	NO NAME	amino acid permease	1108	1349	887	1114.67
LGG_RS06020	LGG_01253	NO NAME	XRE family transcriptional regulator	707	796	580	694.333
LGG_RS06025	LGG_01254	NO NAME	DNA helicase	3768	4766	3730	4088
LGG_RS06030	LGG_01255	rpsD	30S ribosomal protein S4	20724	16493	11523	16246.7
LGG_RS06035	LGG_01256	yebR	sensor histidine kinase	539	535	373	482.333
LGG_RS06040	LGG_01257	NO NAME	septation ring formation regulator EzrA	4149	4421	3484	4018
LGG_RS06045	LGG_01258	nifS	aminotransferase V	2324	2271	1791	2128.67
LGG_RS06050	LGG_01259	thiI	thiamine biosynthesis protein ThiI	3193	3356	2363	2970.67
LGG_RS06055	LGG_01260	rex	REX family transcriptional regulator	251	292	318	287
LGG_RS06060	LGG_01261	valS	valine--tRNA ligase	40687	39033	33084	37601.3
LGG_RS06065	LGG_01262	folC	bifunctional folylpolyglutamate synthase/dihydrofolate synthase	2475	2761	2244	2493.33
LGG_RS06070	LGG_01263	NO NAME	haloacid dehalogenase	900	998	783	893.667
LGG_RS06075	LGG_01264	radC	DNA repair protein RadC	1083	1162	1365	1203.33
LGG_RS06080	LGG_01265	mreB	rod shape-determining protein Mbl	13224	14633	10498	12785
LGG_RS06085	LGG_01266	mreC	rod shape-determining protein MreC	5614	7131	4780	5841.67
LGG_RS06090	LGG_01267	mreD	cell shape-determining protein	3242	4031	2673	3315.33
LGG_RS06095	LGG_01268	minC	cell division inhibitor	2837	3381	2096	2771.33
LGG_RS06100	LGG_01269	minD	septum site-determining protein MinD	3444	3868	2461	3257.67
LGG_RS06105	LGG_01270	glnP	amino acid ABC transporter permease	294	339	374	335.667
LGG_RS06110	LGG_01271	glnQ	polar amino acid ABC transporter ATP-binding protein	376	477	428	427
LGG_RS06115	LGG_01272	glnH	amino acid ABC transporter substrate-binding protein	738	841	813	797.333
LGG_RS06120	LGG_01274	cls	cardiolipin synthase	544	556	615	571.667
LGG_RS06125	LGG_01276	NO NAME	hypothetical protein	724	719	511	651.333
LGG_RS06130	LGG_01277	mraZ	cell division protein MraZ	3557	3228	2849	3211.33
LGG_RS06135	LGG_01278	mraW	16S rRNA (cytosine(1402)-N(4))-methyltransferase	8186	8185	7269	7880
LGG_RS06140	LGG_01279	ftsL	cell division protein FtsL	2036	2147	1462	1881.67
LGG_RS06145	LGG_01280	pbpb	penicillin-binding protein 2B	12698	13830	11675	12734.3
LGG_RS06150	LGG_01281	mraY	phospho-N-acetylmuramoyl-pentapeptide transferase	6919	8045	5529	6831
LGG_RS06155	LGG_01282	murD	UDP-N-acetylmuramoylalanine--D-glutamate ligase	17140	19068	14136	16781.3
LGG_RS06160	LGG_01283	murG	UDP-diphospho-muramoylpentapeptide beta-N- acetylglucosaminyltransferase	16931	18591	13994	16505.3
LGG_RS06165	LGG_01284	ftsQ	cell division protein FtsQ	9200	9848	7156	8734.67
LGG_RS06170	LGG_01285	ftsA	cell division protein FtsA	24645	25096	19498	23079.7
LGG_RS06175	LGG_01286	ftsZ	cell division protein FtsZ	33332	34360	29566	32419.3
LGG_RS06180	LGG_01287	sepF	cell division protein SepF	21742	22260	20942	21648
LGG_RS06185	LGG_01288	ylmG	cell division protein	5082	5101	4516	4899.67
LGG_RS06190	LGG_01289	ylmH	RNA-binding protein	18162	18486	15060	17236
LGG_RS06195	LGG_01290	divIVA	cell division protein DivIVA	23387	23464	19608	22153
LGG_RS06200	LGG_01291	ileS	isoleucyl-tRNA synthetase	77343	80866	64734	74314.3
LGG_RS06205	LGG_01292	cspA	cold-shock protein	5226	5265	4183	4891.33
LGG_RS06210	LGG_01293	pstS	phosphate ABC transporter substrate-binding protein	857	1397	1029	1094.33
LGG_RS06215	LGG_01294	ydiC	multidrug MFS transporter	367	595	330	430.667
LGG_RS06220	LGG_01295	telA	tellurite resistance protein TelA	7746	9481	7858	8361.67
LGG_RS06225	LGG_01296	NO NAME	MFS transporter	3428	3877	2995	3433.33
LGG_RS06230	LGG_01297	nudF	NUDIX hydrolase	1310	1084	1029	1141
LGG_RS06235	LGG_01298	NO NAME	membrane protein	512	473	423	469.333
LGG_RS06240	LGG_01299	mtnN	5'-methylthioadenosine nucleosidase	3534	3501	2830	3288.33
LGG_RS06245	LGG_01300	iscS	cysteine desulfurase	7719	7421	5668	6936
LGG_RS06250	LGG_01302	NO NAME	cysteine desulfurase	3599	3572	2742	3304.33
LGG_RS06255	LGG_01303	uvrA	daunorubicin resistance protein DrrC	3232	3309	2521	3020.67
LGG_RS06260	LGG_01304	mnmA	tRNA (5-methylaminomethyl-2-thiouridylate)-methyltransferase	8345	8731	7744	8273.33
LGG_RS06265	LGG_01306	gpm	phosphoglycerate mutase	1298	1403	1408	1369.67
LGG_RS06270	LGG_01307	NO NAME	hypothetical protein	1480	1792	1519	1597
LGG_RS06275	LGG_01308	recD	hypothetical protein	5974	7076	5909	6319.67
LGG_RS06280	LGG_01309	NO NAME	GNAT family acetyltransferase	5628	6452	5230	5770
LGG_RS06285	LGG_01310	NO NAME	diacylglycerol kinase	1079	1095	875	1016.33
LGG_RS06290	LGG_01311	ykqC	ribonuclease J	25390	21817	16721	21309.3
LGG_RS06295	LGG_01312	NO NAME	hypothetical protein	1264	1092	735	1030.33
LGG_RS06300	not predicted	NO NAME	hypothetical protein	1505	1175	1004	1228
LGG_RS06305	LGG_01313	NO NAME	hypothetical protein	575	560	610	581.667
LGG_RS06310	pseudo-gene	NO NAME	hypothetical protein	562	534	496	530.667
LGG_RS06315	LGG_01315	def	peptide deformylase	2477	2492	2168	2379
LGG_RS06320	LGG_01319	NO NAME	ATPase	5782	4609	3006	4465.67
LGG_RS06325	LGG_01320	pdhA	pyruvate dehydrogenase E1 subunit alpha	62826	26972	47995	45931
LGG_RS06330	LGG_01321	pdhB	2-oxoisovalerate dehydrogenase subunit beta	68041	25525	54057	49207.7
LGG_RS06335	LGG_01322	pdhC	dihydrolipoamide acetyltransferase	83776	31285	70768	61943
LGG_RS06340	LGG_01323	pdhD	dihydrolipoamide dehydrogenase	60956	26768	44104	43942.7
LGG_RS06345	LGG_01324	NO NAME	lactate dehydrogenase	3970	2673	3561	3401.33
LGG_RS06350	LGG_01325	yktA	hypothetical protein	1135	850	1062	1015.67
LGG_RS06355	LGG_01326	suhB	fructose 1%2C6-bisphosphatase	3789	3078	3120	3329
LGG_RS06360	LGG_01327	typA	GTP-binding protein	21071	29459	13462	21330.7
LGG_RS06365	LGG_01328	ftsW	cell division protein FtsW	1239	1250	854	1114.33
LGG_RS06370	LGG_01329	pyc	pyruvate carboxylase	16933	17765	13733	16143.7
LGG_RS06375	LGG_01330	NO NAME	hypothetical protein	1253	1234	1169	1218.67
LGG_RS06380	LGG_01331	rsmD	rRNA methyltransferase	1950	1832	1969	1917
LGG_RS06385	LGG_01332	coaD	phosphopantetheine adenylyltransferase	1297	1154	1053	1168
LGG_RS06390	LGG_01333	lon	peptidase S16	4852	4993	4234	4693
LGG_RS06395	LGG_01334	comEa	transporter	426	468	403	432.333
LGG_RS06400	LGG_01335	comEc	MBL fold hydrolase	1098	1259	933	1096.67
LGG_RS06405	LGG_01336	holA	DNA polymerase III subunit delta	1844	2182	1694	1906.67
LGG_RS06410	LGG_01337	rpsT	30S ribosomal protein S20	6204	5904	4728	5612
LGG_RS06415	LGG_01338	rpsO	30S ribosomal protein S15	6901	7036	5448	6461.67
LGG_RS06420	LGG_01339	NO NAME	hypothetical protein	702	722	573	665.667
LGG_RS06425	LGG_01340	ykqC	RNase J family beta-CASP ribonuclease	8536	7565	5357	7152.67
LGG_RS06430	LGG_01341	NO NAME	hypothetical protein	1056	847	878	927
LGG_RS06435	LGG_01342	tuf	elongation factor Tu	186895	186817	136179	169964
LGG_RS06440	pseudo-gene	NO NAME	hydrogenase	333	335	258	308.667
LGG_RS06445	LGG_01347	NO NAME	NAD-dependent deacetylase	213	231	169	204.333
LGG_RS06450	LGG_01348	pcaC	carboxymuconolactone decarboxylase	78	78	67	74.3333
LGG_RS06455	LGG_01349	merR	MerR family transcriptional regulator	44	35	43	40.6667
LGG_RS06460	LGG_01350	yknV	multidrug ABC transporter ATP-binding protein	418	357	364	379.667
LGG_RS06465	LGG_01351	tig	trigger factor	45013	43497	31067	39859
LGG_RS06470	LGG_01352	clpX	ATP-dependent Clp protease ATP-binding subunit ClpX	21272	22167	16475	19971.3
LGG_RS06475	LGG_01353	engB	GTP-binding protein	1415	1327	1367	1369.67
LGG_RS06480	LGG_01354	NO NAME	nucleotide pyrophosphohydrolase	848	753	754	785
LGG_RS06485	LGG_01356	glnP	ABC transporter permease	3541	2403	3356	3100
LGG_RS06490	LGG_01357	glnQ	ABC transporter ATP-binding protein	2341	1725	2469	2178.33
LGG_RS06495	LGG_01358	uvrC	excinuclease ABC subunit C	2306	2018	2350	2224.67
LGG_RS06500	LGG_01359	fruA	PTS fructose transporter subunit IIC	15500	44089	10207	23265.3
LGG_RS06505	LGG_01360	fruB	1-phosphofructokinase	5540	23137	4232	10969.7
LGG_RS06510	LGG_01361	fruR	DeoR family transcriptional regulator	2099	10219	1671	4663
LGG_RS06515	LGG_01362	obg	GTPase CgtA	2227	3119	2211	2519
LGG_RS06520	LGG_01363	yvhB	acyltransferase	3813	6470	3544	4609
LGG_RS06525	LGG_01364	rnz/elaC	ribonuclease Z	4364	4913	4081	4452.67
LGG_RS06530	LGG_01365	dltE	short-chain dehydrogenase	3910	4044	3556	3836.67
LGG_RS06535	LGG_01366	NO NAME	membrane protein	1703	1799	1453	1651.67
LGG_RS06540	LGG_01367	clpB	chaperone protein ClpB	8424	8796	7772	8330.67
LGG_RS06545	LGG_01368	rpmF	50S ribosomal protein L32	4760	4547	3364	4223.67
LGG_RS06550	LGG_01369	NO NAME	hypothetical protein	426	490	351	422.333
LGG_RS06555	LGG_01370	ycjM	2'%2C 3'-cyclic nucleotide 2'-phosphodiesterase	2909	3562	2622	3031
LGG_RS06560	LGG_01371	NO NAME	hypothetical protein	2437	2899	2007	2447.67
LGG_RS06565	LGG_01372	NO NAME	hypothetical protein	1304	1383	1331	1339.33
LGG_RS06570	LGG_01373	dnaE	DNA polymerase III subunit epsilon	10763	13719	10489	11657
LGG_RS06575	LGG_01374	pfkA	6-phosphofructokinase	22333	36502	19740	26191.7
LGG_RS06580	LGG_01375	pyk	pyruvate kinase	201199	254692	158720	204870
LGG_RS06585	LGG_01376	ytwI	membrane protein	651	741	476	622.667
LGG_RS06590	LGG_01377	cvfB	S1 RNA-binding protein	1534	1686	1042	1420.67
LGG_RS06595	LGG_01378	xerD	tyrosine recombinase XerD	1961	2190	1397	1849.33
LGG_RS06600	LGG_01379	ribT	GNAT family acetyltransferase	1380	1368	1004	1250.67
LGG_RS06605	LGG_01380	scpA	segregation and condensation protein A	2301	2311	1761	2124.33
LGG_RS06610	LGG_01381	scpB	SMC-Scp complex subunit ScpB	1317	1332	945	1198
LGG_RS06615	LGG_01382	rluB	pseudouridine synthase	2685	2811	2268	2588
LGG_RS06620	LGG_01383	NO NAME	membrane protein	1543	1049	840	1144
LGG_RS06625	LGG_01384	fer	ferredoxin	682	676	650	669.333
LGG_RS06630	LGG_01385	NO NAME	hypothetical protein	2148	2384	1954	2162
LGG_RS06635	LGG_01386	recQ	ATP-dependent DNA helicase RecQ	3992	4231	3594	3939
LGG_RS06640	LGG_01387	NO NAME	peptidase M23	12677	13059	10955	12230.3
LGG_RS06645	LGG_01388	cmk	cytidylate kinase	11845	12379	9294	11172.7
LGG_RS06650	LGG_01389	rpsA	30S ribosomal protein S1	81889	92401	72014	82101.3
LGG_RS06655	LGG_01390	engA	ribosome-associated GTPase EngA	8178	8153	6349	7560
LGG_RS06660	LGG_01391	hup	transcriptional regulator	28762	24112	19778	24217.3
LGG_RS06665	LGG_01392	NO NAME	hypothetical protein	5193	4638	4259	4696.67
LGG_RS06670	LGG_01393	ypjC	membrane protein	3792	3621	3340	3584.33
LGG_RS06675	LGG_01394	cca	tRNA CCA-pyrophosphorylase	3315	2983	2819	3039
LGG_RS06680	LGG_01395	NO NAME	hypothetical protein	5540	3897	5073	4836.67
LGG_RS06685	LGG_01396	yfmR	ABC transporter ATP-binding protein	5247	5543	5130	5306.67
LGG_RS06690	LGG_01397	thyA	thymidylate synthase	3634	3907	2948	3496.33
LGG_RS06695	LGG_01398	folA	dihydrofolate reductase	2064	2158	1604	1942
LGG_RS06700	LGG_01399	hly	hemolysin III	209	241	160	203.333
LGG_RS06705	LGG_01400	DegV	hypothetical protein	3204	3551	3026	3260.33
LGG_RS06710	LGG_01401	NO NAME	lipase/acylhydrolase	1254	1295	1106	1218.33
LGG_RS06715	LGG_01402	NO NAME	hypothetical protein	1309	1288	1083	1226.67
LGG_RS06720	LGG_01403	msrA	methionine sulfoxide reductase A	2033	2029	1694	1918.67
LGG_RS06725	LGG_01404	NO NAME	hypothetical protein	588	686	406	560
LGG_RS06730	LGG_01405	ctpA	peptidase S41	4964	4836	3366	4388.67
LGG_RS06735	LGG_01406	NO NAME	hypothetical protein	128	127	120	125
LGG_RS06740	not predicted	NO NAME	hypothetical protein	268	268	235	257
LGG_RS06745	LGG_01407	NO NAME	hypothetical protein	1444	1799	1411	1551.33
LGG_RS06750	LGG_01408	rbgA	GTPase	2857	3792	3028	3225.67
LGG_RS06755	LGG_01409	rnhB	ribonuclease HII	2664	3306	2617	2862.33
LGG_RS06760	LGG_01410	dprA	DNA processing protein DprA	989	1245	782	1005.33
LGG_RS06765	LGG_01411	topA	DNA topoisomerase I	12917	14959	10735	12870.3
LGG_RS06770	LGG_01412	trmFO	tRNA (uracil-5-)-methyltransferase	2079	1804	1230	1704.33
LGG_RS06775	LGG_01413	xerC	tyrosine recombinase XerC	4171	3279	3154	3534.67
LGG_RS06780	LGG_01414	hslV	ATP-dependent protease subunit HslV	3396	2344	2491	2743.67
LGG_RS06785	LGG_01416	hslU	ATP-dependent protease	15048	10815	13497	13120
LGG_RS06790	LGG_01417	lacX	aldose 1-epimerase	8531	6406	6354	7097
LGG_RS06795	LGG_01418	yneS	membrane protein	1369	1246	1100	1238.33
LGG_RS06800	LGG_01419	parE	DNA topoisomerase IV subunit B	10584	10387	8578	9849.67
LGG_RS06805	LGG_01420	parC	DNA topoisomerase IV subunit A	17359	16548	13297	15734.7
LGG_RS06810	LGG_01421	pflB	formate acetyltransferase	104224	40477	67597	70766
LGG_RS06815	LGG_01422	pflA	formate C-acetyltransferase	20532	5874	13875	13427
LGG_RS06820	LGG_01423	lysR	LysR family transcriptional regulator	13692	11430	9864	11662
LGG_RS06825	LGG_01424	ppaC	pyrophosphatase	30154	35092	25855	30367
LGG_RS06830	LGG_01425	xerC	tyrosine recombinase XerS	510	588	443	513.667
LGG_RS06835	LGG_01426	NO NAME	ABC transporter permease	1404	1895	1367	1555.33
LGG_RS06840	LGG_01427	vraD	ABC transporter ATP-binding protein	868	1159	925	984
LGG_RS06845	LGG_01428	graS	signal transduction histidine kinase	935	1153	850	979.333
LGG_RS06850	LGG_01429	graR	two-component system response regulator	520	609	425	518
LGG_RS06855	LGG_01430	NO NAME	MFS transporter permease	950	922	813	895
LGG_RS06860	LGG_01431	NO NAME	GCN5 family N-acetyltransferase	1602	1533	1097	1410.67
LGG_RS06865	LGG_01432	NO NAME	acetyltransferase	3005	3033	2427	2821.67
LGG_RS06870	LGG_01433	NO NAME	nitroreductase	6056	6313	5389	5919.33
LGG_RS06875	LGG_01434	hpaG	fumarylacetoacetate hydrolase	2656	2840	3045	2847
LGG_RS06880	LGG_01435	hisC	histidinol-phosphate aminotransferase	366	509	399	424.667
LGG_RS06885	LGG_01436	hisE	phosphoribosyl-ATP pyrophosphatase	126	145	128	133
LGG_RS06890	LGG_01437	hisI	phosphoribosyl-AMP cyclohydrolase	104	133	128	121.667
LGG_RS06895	LGG_01438	hisF	imidazole glycerol phosphate synthase subunit HisF	181	218	215	204.667
LGG_RS06900	LGG_01439	hisA	1-(5-phosphoribosyl)-5-[(5-phosphoribosylamino)methylideneamino] imidazole-4-carboxamide isomerase	294	310	307	303.667
LGG_RS06905	LGG_01440	hisH	imidazole glycerol phosphate synthase subunit HisH	230	282	258	256.667
LGG_RS06910	LGG_01441	hisB	imidazoleglycerol-phosphate dehydratase	235	309	302	282
LGG_RS06915	LGG_01443	hisD	histidinol dehydrogenase	368	463	403	411.333
LGG_RS06920	LGG_01444	hisG	ATP phosphoribosyltransferase	172	217	215	201.333
LGG_RS06925	LGG_01445	hisZ	ATP phosphoribosyltransferase	180	217	197	198
LGG_RS06930	LGG_01446	hisC	histidinol-phosphate aminotransferase	954	781	851	862
LGG_RS06935	LGG_01447	nudF	NUDIX hydrolase	1282	1316	979	1192.33
LGG_RS06940	LGG_01448	degV	hypothetical protein	1756	1975	1383	1704.67
LGG_RS06945	LGG_01449	NO NAME	hypothetical protein	752	861	674	762.333
LGG_RS06950	LGG_01450	fbp	hypothetical protein	1563	1679	1576	1606
LGG_RS06955	LGG_01451	NO NAME	pyrophosphatase	570	644	450	554.667
LGG_RS06960	LGG_01452	pfoS/R	membrane protein	217	253	160	210
LGG_RS06965	LGG_01453	pyrE	orotate phosphoribosyltransferase	3389	2978	2386	2917.67
LGG_RS06970	LGG_01454	pyrF	orotidine 5'-phosphate decarboxylase	3119	2845	2140	2701.33
LGG_RS06975	LGG_01455	purD	diguanylate cyclase	5581	5134	3731	4815.33
LGG_RS06980	LGG_01456	carB	carbamoyl phosphate synthase large subunit	29639	27572	19426	25545.7
LGG_RS06985	LGG_01457	carA	carbamoyl phosphate synthase small subunit	8069	7576	4993	6879.33
LGG_RS06990	LGG_01458	pyrC	dihydroorotase	7902	7453	5360	6905
LGG_RS06995	LGG_01459	pyrB	aspartate carbamoyltransferase	4431	4065	3023	3839.67
LGG_RS07000	LGG_01460	uraA	uracil transporter	3365	2886	2286	2845.67
LGG_RS07005	LGG_01461	pyrR	uracil phosphoribosyltransferase	1161	978	897	1012
LGG_RS07010	LGG_01463	rluD	RNA pseudouridine synthase	3120	3250	2171	2847
LGG_RS07015	LGG_01464	lspA	signal peptidase II	1578	1714	1027	1439.67
LGG_RS07020	LGG_01465	fhs	formate--tetrahydrofolate ligase	73595	91111	62413	75706.3
LGG_RS07025	LGG_01466	NO NAME	hypothetical protein	909	1113	762	928
LGG_RS07030	LGG_01467	rnhA	ribonuclease HI	229	267	166	220.667
LGG_RS07035	LGG_01468	NO NAME	nitroreductase	807	1059	891	919
LGG_RS07040	LGG_01469	cls	cardiolipin synthase	1113	1258	879	1083.33
LGG_RS07045	LGG_01471	NO NAME	hypothetical protein	1763	1936	1760	1819.67
LGG_RS07050	LGG_01472	NO NAME	transcriptional regulator	989	1235	1038	1087.33
LGG_RS07055	LGG_01473	nrdH	glutaredoxin	1478	1467	1147	1364
LGG_RS07060	LGG_01474	nrdE	ribonucleotide-diphosphate reductase subunit alpha	12697	13903	10073	12224.3
LGG_RS07065	LGG_01475	nrdF	ribonucleoside-diphosphate reductase	7990	8406	6759	7718.33
LGG_RS07070	LGG_01476	hypR	LysR family transcriptional regulator	5543	5678	4942	5387.67
LGG_RS07075	LGG_01478	pepO	peptidase M13	31078	35101	27371	31183.3
LGG_RS07080	LGG_01479	lplA	lipoate-protein ligase A	11544	7807	9894	9748.33
LGG_RS07085	LGG_01480	NO NAME	hypothetical protein	4126	3731	3346	3734.33
LGG_RS07090	LGG_01481	serA	3-phosphoglycerate dehydrogenase	4380	4713	3277	4123.33
LGG_RS07095	LGG_01482	ypsC	RNA methyltransferase	4404	4714	3394	4170.67
LGG_RS07100	LGG_01484	gpsB	cell division protein GpsB	4071	4229	3010	3770
LGG_RS07105	LGG_01485	ypsA	hypothetical protein	1674	1880	1367	1640.33
LGG_RS07110	LGG_01486	recU	recombinase RecU	2514	2819	2300	2544.33
LGG_RS07115	LGG_01487	pbp1A	penicillin-binding protein 1A	11190	13077	9305	11190.7
LGG_RS07120	LGG_01488	comEB	hypothetical protein	2923	2814	2733	2823.33
LGG_RS07125	LGG_01489	nth	endonuclease III	4498	4754	4655	4635.67
LGG_RS07130	LGG_01490	dnaD	DNA replication protein DnaD	9957	10431	9141	9843
LGG_RS07135	LGG_01491	asnS	asparaginyl-tRNA synthase	27982	30636	23537	27385
LGG_RS07140	LGG_01492	aspB	aspartate aminotransferase	22142	24061	18174	21459
LGG_RS07145	LGG_01493	NO NAME	hypothetical protein	4103	4184	3072	3786.33
LGG_RS07150	LGG_01495	dinG	DNA helicase	7910	8875	5636	7473.67
LGG_RS07155	LGG_01496	rexA	ATP-dependent helicase	8070	8644	5990	7568
LGG_RS07160	LGG_01497	rexB	ATP-dependent helicase	5939	6379	4474	5597.33
LGG_RS07165	LGG_01498	mvaK	mevalonate kinase	2030	2327	1807	2054.67
LGG_RS07170	LGG_01499	mvaD	diphosphomevalonate decarboxylase	2815	3170	2430	2805
LGG_RS07175	LGG_01500	fni	isopentenyl pyrophosphate isomerase	2231	2325	1734	2096.67
LGG_RS07180	LGG_01501	Sun2	23S rRNA methyltransferase	2190	2457	1608	2085
LGG_RS07185	LGG_01502	NO NAME	membrane protein	1441	1653	1103	1399
LGG_RS07190	LGG_01504	NO NAME	SAM-dependent methyltransferase	1724	1870	1246	1613.33
LGG_RS07195	LGG_01505	yitW	DNA methyltransferase	1798	2088	1539	1808.33
LGG_RS07200	LGG_01506	nahJ	4-oxalocrotonate tautomerase	927	945	783	885
LGG_RS07205	LGG_01507	NO NAME	ABC transporter ATP-binding protein	924	1024	699	882.333
LGG_RS07210	LGG_01508	NO NAME	ABC transporter ATP-binding protein	979	1069	700	916
LGG_RS07215	LGG_01509	NO NAME	Nif3-like dinuclear metal center hexameric protein	3358	3591	2974	3307.67
LGG_RS07220	LGG_01510	yqfN	SAM-dependent methyltransferase	2573	2637	2497	2569
LGG_RS07225	LGG_01511	rpoD	RNA polymerase sigma factor RpoD	13317	16478	11686	13827
LGG_RS07230	LGG_01512	dnaG	DNA primase	14060	18665	12969	15231.3
LGG_RS07235	LGG_01513	glyS	glycine-tRNA synthetase subunit beta	13739	27121	12608	17822.7
LGG_RS07240	LGG_01514	glyQ	glycyl-tRNA synthetase subunit alpha	4986	10441	4924	6783.67
LGG_RS07245	LGG_01515	NO NAME	integrase	2726	3778	3075	3193
LGG_RS07250	LGG_01516	NO NAME	hypothetical protein	528	666	681	625
LGG_RS07255	LGG_01518	NO NAME	hypothetical protein	1123	1251	1107	1160.33
LGG_RS07260	LGG_01519	NO NAME	endolysin	188	216	111	171.667
LGG_RS07265	LGG_01520	NO NAME	primase	18	31	22	23.6667
LGG_RS07270	LGG_01521	NO NAME	primase	12	19	17	16
LGG_RS07275	LGG_01522	NO NAME	phage infection protein	4	7	2	4.33333
LGG_RS07280	LGG_01523	NO NAME	phage tail protein	168	195	156	173
LGG_RS07285	LGG_01524	NO NAME	tail protein	153	175	126	151.333
LGG_RS07290	LGG_01525	NO NAME	tail protein	53	76	65	64.6667
LGG_RS07295	not predicted	NO NAME	hypothetical protein	2	7	2	3.66667
LGG_RS07300	LGG_01527	NO NAME	tail protein	5	5	2	4
LGG_RS07305	LGG_01528	NO NAME	tail protein	46	38	26	36.6667
LGG_RS07310	LGG_01529	NO NAME	tail protein	26	32	19	25.6667
LGG_RS07315	LGG_01530	NO NAME	head-tail connector protein	46	40	35	40.3333
LGG_RS07320	not predicted	NO NAME	head-tail joining protein	37	32	29	32.6667
LGG_RS07325	LGG_01532	NO NAME	hypothetical protein	12	19	12	14.3333
LGG_RS07330	LGG_01533	NO NAME	phage capsid protein	201	250	183	211.333
LGG_RS07335	LGG_01534	NO NAME	portal protein	26	33	23	27.3333
LGG_RS07340	not predicted	NO NAME	hypothetical protein	3	3	1	2.33333
LGG_RS07345	LGG_01535	NO NAME	terminase	27	39	46	37.3333
LGG_RS07350	LGG_01536	NO NAME	terminase	9	4	6	6.33333
LGG_RS07355	LGG_01537	tnpR	resolvase	106	79	65	83.3333
LGG_RS07360	LGG_01538	NO NAME	glycosyl transferase family 2	19	32	13	21.3333
LGG_RS07365	LGG_01539	is40	transposase	1	0	1	0.666667
LGG_RS07370	not predicted	NO NAME	hypothetical protein	17	16	12	15
LGG_RS07375	not predicted	NO NAME	hypothetical protein	14	17	11	14
LGG_RS07380	LGG_01540	NO NAME	DNA primase	26	22	21	23
LGG_RS07385	LGG_01541	ssb4	single-stranded DNA-binding protein	4	11	10	8.33333
LGG_RS07390	LGG_01542	NO NAME	hypothetical protein	17	28	16	20.3333
LGG_RS07395	LGG_01543	NO NAME	hypothetical protein	5	10	23	12.6667
LGG_RS07405	LGG_01544	NO NAME	hypothetical protein	1120	1298	1396	1271.33
LGG_RS07410	not predicted	NO NAME	hypothetical protein	159	184	231	191.333
LGG_RS07415	LGG_01545	rimL	GNAT family acetyltransferase	333	469	318	373.333
LGG_RS07420	LGG_01546	NO NAME	hypothetical protein	422	558	379	453
LGG_RS07425	LGG_01547	NO NAME	ABC transporter ATP-binding protein	409	567	393	456.333
LGG_RS07430	LGG_01548	NO NAME	hypothetical protein	1020	703	855	859.333
LGG_RS07435	LGG_01549	recO	DNA repair protein RecO	880	962	636	826
LGG_RS07440	LGG_01550	era	GTPase Era	2663	3061	2373	2699
LGG_RS07445	LGG_01551	cdd	cytidine deaminase	941	1133	751	941.667
LGG_RS07450	LGG_01552	dgkA	diacylglycerol kinase	888	1108	725	907
LGG_RS07455	LGG_01553	NO NAME	rRNA maturation RNase YbeY	933	1016	674	874.333
LGG_RS07460	LGG_01554	phoH	phosphate starvation protein PhoH	3888	4353	3525	3922
LGG_RS07465	LGG_01555	yqeY	hypothetical protein	18316	16177	12975	15822.7
LGG_RS07470	LGG_01556	rpsU	30S ribosomal protein S21	4946	4546	3301	4264.33
LGG_RS07475	LGG_01557	yqfL	hypothetical protein	2035	1747	1708	1830
LGG_RS07480	LGG_01558	nfo	endonuclease IV	2922	2697	1967	2528.67
LGG_RS07485	LGG_01559	yitT	membrane protein	1950	1884	1409	1747.67
LGG_RS07490	LGG_01560	msrB	methionine sulfoxide reductase B	1375	1174	922	1157
LGG_RS07495	LGG_01561	aspS	aspartyl-tRNA synthetase	19162	19285	16344	18263.7
LGG_RS07500	LGG_01562	hisS	histidyl-tRNA synthetase	9775	8747	9759	9427
LGG_RS07505	LGG_01563	NO NAME	ABC transporter permease	777	904	784	821.667
LGG_RS07510	LGG_01564	mppX	ABC transporter ATP-binding protein	375	421	339	378.333
LGG_RS07515	LGG_01565	NO NAME	DeoR family transcriptional regulator	391	389	299	359.667
LGG_RS07520	LGG_01566	ami	N-acetylmuramoyl-L-alanine amidase	1720	2075	1502	1765.67
LGG_RS07525	LGG_01567	NO NAME	haloacid dehalogenase	1608	1599	1131	1446
LGG_RS07530	LGG_01568	dtd	D-tyrosyl-tRNA(Tyr) deacylase	1363	1560	1246	1389.67
LGG_RS07535	LGG_01569	relA	GTP pyrophosphokinase	19515	22184	16366	19355
LGG_RS07540	LGG_01570	NO NAME	membrane protein	1151	1422	861	1144.67
LGG_RS07545	LGG_01571	nadD	16S rRNA methyltransferase	1953	2239	1430	1874
LGG_RS07550	LGG_01572	prmA	50S ribosomal protein L11 methyltransferase	1986	2373	1611	1990
LGG_RS07555	LGG_01573	NO NAME	hypothetical protein	802	976	693	823.667
LGG_RS07560	LGG_01574	mpg	3-methyladenine DNA glycosylase	765	849	579	731
LGG_RS07565	LGG_01575	NO NAME	hypothetical protein	693	693	485	623.667
LGG_RS07570	LGG_01576	NO NAME	membrane protein	305	350	245	300
LGG_RS07575	LGG_01577	NO NAME	hypothetical protein	417	385	276	359.333
LGG_RS07580	LGG_01578	NO NAME	hypothetical protein	1403	1340	1125	1289.33
LGG_RS07585	LGG_02998	tRNA-Ser	tRNA-Ser	57	37	24	39.3333
LGG_RS07590	LGG_01579	NO NAME	NAD(P)H dehydrogenase	423	371	305	366.333
LGG_RS07595	LGG_01580	NO NAME	TetR family transcriptional regulator	377	403	341	373.667
LGG_RS07600	LGG_01581	is41	transposase	2	1	1	1.33333
LGG_RS07605	LGG_01582	NO NAME	oxidoreductase	47	74	38	53
LGG_RS07610	LGG_01583	NO NAME	hypothetical protein	32	38	32	34
LGG_RS07615	LGG_01584	is42	transposase	0	0	0	0
LGG_RS07620	LGG_01585	is43	transposase	0	0	0	0
LGG_RS07625	LGG_01586	yohH	glycosyl transferase family 1	336	409	312	352.333
LGG_RS07630	LGG_01587	yohJ	glycosyl transferase family 1	250	351	235	278.667
LGG_RS07635	LGG_01588	NO NAME	hypothetical protein	113	145	97	118.333
LGG_RS07640	LGG_01589	NO NAME	cell surface protein	108	136	110	118
LGG_RS07645	LGG_01590	NO NAME	hypothetical protein	26	33	20	26.3333
LGG_RS07650	LGG_01591	NO NAME	membrane protein	324	378	324	342
LGG_RS07655	LGG_01592	NO NAME	peptidase	229	251	188	222.667
LGG_RS07660	LGG_01593	NO NAME	hypothetical protein	361	369	326	352
LGG_RS07665	LGG_01594	hutG	N-formylglutamate amidohydrolase	423	453	342	406
LGG_RS07670	LGG_01595	folE	GTP cyclohydrolase	3644	3920	2955	3506.33
LGG_RS07675	LGG_01596	ebsC	aminoacyl-tRNA deacylase	4623	5200	4001	4608
LGG_RS07680	LGG_01597	apt	adenine phosphoribosyltransferase	4370	4932	3828	4376.67
LGG_RS07685	LGG_01598	recJ	single-stranded DNA-binding protein	8131	8943	6862	7978.67
LGG_RS07690	LGG_01599	NO NAME	hypothetical protein	14325	13099	14023	13815.7
LGG_RS07695	LGG_01600	NO NAME	RNA-binding protein	1735	1795	1477	1669
LGG_RS07700	LGG_01601	NO NAME	hypothetical protein	1308	1348	1358	1338
LGG_RS07705	LGG_01602	lepA	elongation factor 4	5070	5341	4570	4993.67
LGG_RS07710	LGG_01603	dnaJ	molecular chaperone DnaJ	26131	32331	28802	29088
LGG_RS07715	LGG_01604	dnaK	molecular chaperone DnaK	119343	152139	155505	142329
LGG_RS07720	LGG_01605	grpE	co-chaperone GrpE	21988	28644	29185	26605.7
LGG_RS07725	LGG_01606	hrcA	HrcA family transcriptional regulator	23811	30059	25931	26600.3
LGG_RS07730	LGG_01607	hemN	coproporphyrinogen III oxidase	6255	7498	5190	6314.33
LGG_RS07735	LGG_01608	ribF	riboflavin biosynthesis protein RibF	3967	4772	3088	3942.33
LGG_RS07740	LGG_01609	truB	tRNA pseudouridine synthase B	5277	6870	4820	5655.67
LGG_RS07745	LGG_01610	terC	membrane protein	2148	2625	1814	2195.67
LGG_RS07750	LGG_01611	rbfA	ribosome-binding factor A	6105	4790	3581	4825.33
LGG_RS07755	LGG_01612	infB	translation initiation factor IF-2	58814	46646	40692	48717.3
LGG_RS07760	LGG_01613	ylxQ	50S ribosomal protein L7ae	3895	3164	2968	3342.33
LGG_RS07765	LGG_01614	nusA	DNA-binding protein	4100	3154	2670	3308
LGG_RS07770	LGG_01615	nusA	transcription termination factor NusA	17819	13555	12605	14659.7
LGG_RS07775	LGG_01616	yhbC	ribosome maturation protein RimP	6687	4904	5561	5717.33
LGG_RS07780	LGG_01617	polC	DNA polymerase III subunit alpha	17807	18365	13997	16723
LGG_RS07785	LGG_01618	proS	prolyl-tRNA synthetase	11788	12989	8755	11177.3
LGG_RS07790	LGG_01619	eep	metalloprotease RseP	5591	6477	4420	5496
LGG_RS07795	LGG_01620	cdsA	CDP-diglyceride synthetase	3506	4087	2818	3470.33
LGG_RS07800	LGG_01621	uppS	UDP pyrophosphate synthase	1680	1961	1322	1654.33
LGG_RS07805	LGG_01622	is44	transposase	0	0	0	0
LGG_RS07810	LGG_01623	is45	integrase	368	426	239	344.333
LGG_RS07815	LGG_01624	frr	ribosome recycling factor	11370	12115	10872	11452.3
LGG_RS07820	LGG_01625	pyrH	uridylate kinase	13107	14246	12773	13375.3
LGG_RS07825	LGG_01627	tsf	elongation factor Ts	15942	16301	15069	15770.7
LGG_RS07830	LGG_01628	rpsB	30S ribosomal protein S2	26837	26132	22966	25311.7
LGG_RS07835	LGG_01629	yazA	hypothetical protein	455	438	337	410
LGG_RS07840	LGG_01630	yabB	O-methyltransferase	1419	1356	1199	1324.67
LGG_RS07845	LGG_01631	plsC	1-acyl-sn-glycerol-3-phosphate acyltransferase	1925	1986	1435	1782
LGG_RS07850	LGG_01632	yhdG	amino acid permease	1679	1917	1254	1616.67
LGG_RS07855	LGG_01633	yejC	cyclic nucleotide-binding protein	1372	1514	1180	1355.33
LGG_RS07860	LGG_01634	mdlB	ABC transporter ATP-binding protein	3027	3262	2419	2902.67
LGG_RS07865	LGG_01635	mdlA	multidrug ABC transporter ATP-binding protein	2502	2333	2370	2401.67
LGG_RS07870	LGG_01636	NO NAME	hypothetical protein	3811	3298	3243	3450.67
LGG_RS07875	LGG_01637	ynzC	hypothetical protein	1927	1731	1586	1748
LGG_RS07880	LGG_01639	rplS	50S ribosomal protein L19	18712	17754	13253	16573
LGG_RS07885	LGG_01640	trmD	tRNA (guanine(37)-N(1))-methyltransferase	2254	1918	1663	1945
LGG_RS07890	LGG_01641	rimM	16S rRNA-processing protein RimM	1487	1327	1230	1348
LGG_RS07895	LGG_01642	ylqC	RNA-binding protein	4016	2989	3506	3503.67
LGG_RS07900	LGG_01643	rpsP	30S ribosomal protein S16	2891	2206	2684	2593.67
LGG_RS07905	LGG_01644	ffh	signal recognition particle protein	4641	4591	3729	4320.33
LGG_RS07910	LGG_01645	ylxM	DNA-binding protein	820	844	864	842.667
LGG_RS07915	LGG_01647	NO NAME	hypothetical protein	78	78	61	72.3333
LGG_RS07920	LGG_01648	NO NAME	membrane protein	3703	3476	2724	3301
LGG_RS07925	LGG_01649	ftsY	signal recognition particle-docking protein FtsY	7939	8254	6496	7563
LGG_RS07930	LGG_01650	smc	chromosome segregation protein SMC	21017	22341	17408	20255.3
LGG_RS07935	LGG_01651	rnc	ribonuclease III	3937	4207	3840	3994.67
LGG_RS07940	LGG_01652	oppA	peptide ABC transporter substrate-binding protein	79113	80842	69287	76414
LGG_RS07945	LGG_01653	oppC	peptide ABC transporter permease	6902	5943	4322	5722.33
LGG_RS07950	LGG_01654	oppB	peptide ABC transporter permease	10869	10380	7587	9612
LGG_RS07955	LGG_01655	oppF	peptide ABC transporter substrate-binding protein	11845	11877	8294	10672
LGG_RS07960	LGG_01656	oppD	dipeptide/oligopeptide/nickel ABC transporter ATP-binding protein	9380	8690	5748	7939.33
LGG_RS07965	LGG_01658	acpP	acyl carrier protein	1662	1601	1185	1482.67
LGG_RS07970	LGG_01659	plsX	phosphate acyltransferase	5336	5322	3516	4724.67
LGG_RS07975	LGG_01660	recG	ATP-dependent DNA helicase RecG	8576	8570	5412	7519.33
LGG_RS07980	LGG_01661	prfC	hypothetical protein	9248	9746	7289	8761
LGG_RS07985	LGG_01662	asp	hypothetical protein	1287	1249	1059	1198.33
LGG_RS07990	LGG_01663	rpmB	50S ribosomal protein L28	4948	4890	3211	4349.67
LGG_RS07995	LGG_01664	thiN	thiamine pyrophosphokinase	4906	5900	4149	4985
LGG_RS08000	LGG_01665	rpe	ribulose-phosphate 3-epimerase	3340	4260	2958	3519.33
LGG_RS08005	LGG_01666	rsgA	ribosome biogenesis GTPase RsgA	4703	5839	4113	4885
LGG_RS08010	LGG_01667	stkP	protein kinase	10113	12489	8760	10454
LGG_RS08015	LGG_01668	pppL	protein phosphatase	4320	5070	3736	4375.33
LGG_RS08020	LGG_01669	sun	16S rRNA methyltransferase	7980	9145	7450	8191.67
LGG_RS08025	LGG_01670	fmt	methionyl-tRNA formyltransferase	5840	6519	5357	5905.33
LGG_RS08030	LGG_01671	priA	primosomal protein N'	9305	10902	9050	9752.33
LGG_RS08035	LGG_01672	coaBC	DNA/pantothenate metabolism flavoprotein	3580	4151	3479	3736.67
LGG_RS08040	LGG_01673	rpoZ	DNA-directed RNA polymerase subunit omega	2879	2784	2126	2596.33
LGG_RS08045	LGG_01674	gmk	guanylate kinase	2785	2806	2065	2552
LGG_RS08050	LGG_01675	NO NAME	alpha/beta hydrolase	274	265	276	271.667
LGG_RS08055	LGG_01676	NO NAME	hypothetical protein	210	266	228	234.667
LGG_RS08060	LGG_01677	recN	DNA repair protein RecN	6822	7165	6409	6798.67
LGG_RS08065	LGG_01678	argR	arginine repressor	2390	2465	2458	2437.67
LGG_RS08070	LGG_01679	tlyA	cell division protein FtsJ	4266	4604	3962	4277.33
LGG_RS08075	LGG_01680	ispA	farnesyl-diphosphate synthase	4338	4448	3459	4081.67
LGG_RS08080	LGG_01681	xseB	exodeoxyribonuclease VII small subunit	1907	1904	2114	1975
LGG_RS08085	LGG_01682	xseA	exodeoxyribonuclease VII large subunit	5535	5466	4845	5282
LGG_RS08090	LGG_01683	folD	tetrahydrofolate dehydrogenase	2088	2142	1803	2011
LGG_RS08095	LGG_01684	nusB	transcription antitermination protein NusB	3338	3166	2513	3005.67
LGG_RS08100	LGG_01685	asp	alkaline shock protein	5381	4974	4293	4882.67
LGG_RS08105	LGG_01686	efp	elongation factor P	6300	5756	5016	5690.67
LGG_RS08110	LGG_01687	pepQ	peptidase M24	7811	6258	4475	6181.33
LGG_RS08115	LGG_01688	rpmA	50S ribosomal protein L27	6873	5437	4168	5492.67
LGG_RS08120	LGG_01689	ysxB	hypothetical protein	9737	7904	7390	8343.67
LGG_RS08125	LGG_01690	rplU	50S ribosomal protein L21	11607	9773	8904	10094.7
LGG_RS08130	LGG_01691	NO NAME	hypothetical protein	121	113	127	120.333
LGG_RS08135	LGG_01693	NO NAME	hypothetical protein	1814	1956	1224	1664.67
LGG_RS08140	LGG_02978	tRNA-Arg	tRNA-Arg	173	240	171	194.667
LGG_RS08145	LGG_01694	NO NAME	ABC transporter permease	2174	1839	1340	1784.33
LGG_RS08150	LGG_01695	pepX	x-prolyl-dipeptidyl aminopeptidase	4829	3933	3189	3983.67
LGG_RS08155	LGG_01696	glnA	glutamine synthetase	48826	21722	12783	27777
LGG_RS08160	LGG_01697	glnR	MerR family transcriptional regulator	12463	5646	3243	7117.33
LGG_RS08165	LGG_01698	speF	ornithine decarboxylase	3204	3471	2256	2977
LGG_RS08170	LGG_01699	ynbB	aluminum resistance protein	11467	10119	11706	11097.3
LGG_RS08175	LGG_01700	miaA	tRNA dimethylallyltransferase	4639	4072	3991	4234
LGG_RS08180	LGG_01701	NO NAME	hypothetical protein	1515	1475	1070	1353.33
LGG_RS08185	LGG_01702	yqhL	sulfurtransferase	3167	2600	2227	2664.67
LGG_RS08190	LGG_01703	gki	glucokinase	5367	4543	3978	4629.33
LGG_RS08195	LGG_01704	NO NAME	hypothetical protein	729	627	644	666.667
LGG_RS08200	LGG_01705	NO NAME	membrane protein	1439	1204	991	1211.33
LGG_RS08205	LGG_01706	pbp2B	cell division protein FtsI	2709	3108	2409	2742
LGG_RS08210	LGG_01707	NO NAME	hypothetical protein	0	0	0	0
LGG_RS08215	LGG_01708	NO NAME	membrane protein	2365	2775	2238	2459.33
LGG_RS08220	LGG_01709	yneR	iron-sulfur cluster biosynthesis protein	785	691	679	718.333
LGG_RS08225	LGG_01710	vraR	LuxR family transcriptional regulator	1218	1123	928	1089.67
LGG_RS08230	LGG_01711	vraS	two-component system sensor histidine kinase	701	703	495	633
LGG_RS08235	LGG_01712	NO NAME	membrane protein	585	574	492	550.333
LGG_RS08240	LGG_01713	greA	transcription elongation factor GreA	7259	7372	6225	6952
LGG_RS08245	LGG_01714	udk	uridine/cytidine kinase	8875	8919	7192	8328.67
LGG_RS08250	LGG_01715	yrrL	aminodeoxychorismate lyase	19520	20587	17005	19037.3
LGG_RS08255	LGG_01717	pheT	phenylalanine--tRNA ligase subunit beta	48957	53825	42481	48421
LGG_RS08260	LGG_01718	pheS	phenylalanine--tRNA ligase subunit alpha	10023	11248	9377	10216
LGG_RS08265	LGG_01719	yodB	HxlR family transcriptional regulator	636	588	555	593
LGG_RS08270	LGG_01720	spyM	hydrolase	10645	10232	8846	9907.67
LGG_RS08275	LGG_01721	spoU	23S rRNA methyltransferase	3109	3112	2538	2919.67
LGG_RS08280	LGG_01723	acyP	acylphosphatase	3097	3289	2626	3004
LGG_RS08285	LGG_01724	oxaA	protein translocase component YidC	11767	12476	9227	11156.7
LGG_RS08290	LGG_01725	hpk2	two-component system sensor histidine kinase	5142	5707	4399	5082.67
LGG_RS08295	LGG_01726	rr2	two-component system response regulator	3377	3545	2811	3244.33
LGG_RS08300	LGG_01727	gnd	6-phosphogluconate dehydrogenase	33319	39167	30719	34401.7
LGG_RS08305	LGG_01728	NO NAME	peptidase M23	1664	1991	1403	1686
LGG_RS08310	LGG_01729	is46	transposase	3356	3644	2502	3167.33
LGG_RS08315	not predicted	NO NAME	hypothetical protein	732	732	612	692
LGG_RS08320	LGG_01731	NO NAME	nucleic acid-binding protein	4768	4712	4026	4502
LGG_RS08325	LGG_01732	NO NAME	hypothetical protein	6902	6747	6963	6870.67
LGG_RS08330	LGG_01733	yqeM	SAM-dependent methyltransferase	6574	6626	6511	6570.33
LGG_RS08335	LGG_01734	yqeL	ribosome silencing factor RsfS	3359	3535	3445	3446.33
LGG_RS08340	LGG_01735	yqeK	hypothetical protein	4636	4595	4423	4551.33
LGG_RS08345	LGG_01736	nadD	nicotinic acid mononucleotide adenylyltransferase	4589	4741	4861	4730.33
LGG_RS08350	LGG_01737	yqeI	RNA-binding protein	2195	2183	2039	2139
LGG_RS08355	LGG_01738	yqeH	GTPase	4772	5087	4513	4790.67
LGG_RS08360	LGG_01739	yqeG	haloacid dehalogenase	1761	1577	1687	1675
LGG_RS08365	LGG_01740	ykcA	glyoxalase	1316	1003	941	1086.67
LGG_RS08370	LGG_01741	yaiA	glyoxalase	2388	1859	1950	2065.67
LGG_RS08375	LGG_01742	yahD	esterase	1984	1503	1563	1683.33
LGG_RS08380	LGG_01743	NO NAME	NADPH:quinone reductase	2201	1816	1635	1884
LGG_RS08385	LGG_01744	yvdD	lysine decarboxylase	1954	1773	1505	1744
LGG_RS08390	LGG_01745	rplT	50S ribosomal protein L20	6732	5829	3597	5386
LGG_RS08395	LGG_01746	rpmI	50S ribosomal protein L35	5010	4374	3278	4220.67
LGG_RS08400	LGG_01747	infC	translation initiation factor IF-3	9775	7961	5308	7681.33
LGG_RS08405	LGG_01748	NO NAME	Rrf2 family transcriptional regulator	1844	1820	1658	1774
LGG_RS08410	LGG_01749	is47	transposase	0	0	1	0.333333
LGG_RS08415	LGG_01750	NO NAME	transporter	45	79	56	60
LGG_RS08420	LGG_01751	sir2	NAD-dependent deacetylase	14	13	10	12.3333
LGG_RS08425	LGG_01752	NO NAME	hypothetical protein	609	717	636	654
LGG_RS08430	LGG_01753	NO NAME	hypothetical protein	195	287	200	227.333
LGG_RS08435	LGG_01754	thrS	threonyl-tRNA synthetase	67269	92246	66912	75475.7
LGG_RS08440	LGG_01755	NO NAME	hypothetical protein	1148	1442	998	1196
LGG_RS08445	LGG_01756	dnaI	primosomal protein DnaI	1470	1584	1253	1435.67
LGG_RS08450	LGG_01757	NO NAME	replication initiation protein	2448	2348	2329	2375
LGG_RS08455	LGG_01758	nrdR	NrdR family transcriptional regulator	2678	3162	2311	2717
LGG_RS08460	LGG_01759	coaE	dephospho-CoA kinase	2161	2546	1804	2170.33
LGG_RS08465	LGG_01760	mutM	5-hydroxymethyluracil DNA glycosylase	4762	5817	4228	4935.67
LGG_RS08470	LGG_01761	polA	DNA polymerase I	18445	21805	17750	19333.3
LGG_RS08475	LGG_01762	NO NAME	membrane protein	2256	2422	1682	2120
LGG_RS08480	not predicted	NO NAME	hypothetical protein	12	17	3	10.6667
LGG_RS08485	LGG_01763	yqbJ	cell surface protein	88	88	79	85
LGG_RS08490	LGG_01764	NO NAME	hypothetical protein	20	25	16	20.3333
LGG_RS08495	LGG_01765	NO NAME	cell surface protein	54	50	45	49.6667
LGG_RS08500	LGG_01766	NO NAME	cell surface protein	106	120	95	107
LGG_RS08505	LGG_01767	NO NAME	transcriptional regulator	195	154	187	178.667
LGG_RS08510	LGG_01768	murC	UDP-N-acetylmuramate--alanine ligase	13414	13669	14032	13705
LGG_RS08515	LGG_01769	ftsK	cell division protein FtsK	19766	19008	23805	20859.7
LGG_RS08520	LGG_01770	NO NAME	hypothetical protein	175	169	118	154
LGG_RS08525	LGG_01771	pheT	tRNA-binding protein	2789	2983	2257	2676.33
LGG_RS08530	LGG_01772	trxA	thioredoxin	911	1054	841	935.333
LGG_RS08535	LGG_01773	NO NAME	hypothetical protein	430	506	404	446.667
LGG_RS08540	LGG_01774	trmB	tRNA (guanine-N(7)-)-methyltransferase	997	1171	788	985.333
LGG_RS08545	LGG_01775	ytmP	aminoglycoside phosphotransferase	2436	2627	2002	2355
LGG_RS08550	LGG_01776	NO NAME	ABC transporter permease	1135	1280	746	1053.67
LGG_RS08555	LGG_01777	ecsA	multidrug ABC transporter ATP-binding protein	805	760	567	710.667
LGG_RS08560	LGG_01778	hit	histidine triad protein	1116	1347	887	1116.67
LGG_RS08565	LGG_01779	NO NAME	hypothetical protein	2104	2432	1753	2096.33
LGG_RS08570	LGG_01780	prsA	peptidylprolyl isomerase	19926	20651	15523	18700
LGG_RS08575	LGG_01781	cbf	3'-5' exoribonuclease	2197	2452	2002	2217
LGG_RS08580	LGG_01782	NO NAME	hypothetical protein	6379	6933	5527	6279.67
LGG_RS08585	LGG_01783	pbp2A	penicillin-binding protein 1A	3955	3430	4491	3958.67
LGG_RS08590	LGG_01784	rluD	pseudouridylate synthase	491	515	429	478.333
LGG_RS08595	LGG_01785	argR	ArgR family transcriptional regulator	3297	2794	2416	2835.67
LGG_RS08600	LGG_01786	argS	arginyl-tRNA synthetase	7938	7009	6069	7005.33
LGG_RS08605	LGG_02997	tRNA-Gly	tRNA-Gly	157	141	140	146
LGG_RS08610	LGG_01787	NO NAME	hypothetical protein	572	524	431	509
LGG_RS08615	LGG_01788	NO NAME	hypothetical protein	225	190	179	198
LGG_RS08620	LGG_01789	pyrD	dihydroorotate dehydrogenase	2740	2938	2105	2594.33
LGG_RS08625	LGG_01790	NO NAME	glycerophosphoryl diester phosphodiesterase	7347	8315	7634	7765.33
LGG_RS08630	LGG_01791	mecA	adapter protein MecA	6577	7838	6330	6915
LGG_RS08635	LGG_01792	spxA	ArsR family transcriptional regulator	1500	1506	1291	1432.33
LGG_RS08640	LGG_01793	yhfI	hypothetical protein	2578	2607	2324	2503
LGG_RS08645	LGG_01794	NO NAME	hypothetical protein	4713	5145	4340	4732.67
LGG_RS08650	LGG_01795	NO NAME	peptide ABC transporter permease	4983	5949	4219	5050.33
LGG_RS08655	LGG_01796	vraD	bacitracin ABC transporter ATP-binding protein	700	893	748	780.333
LGG_RS08660	LGG_01798	graR	two-component system response regulator	1460	1681	1272	1471
LGG_RS08665	LGG_01799	graS	signal transduction histidine kinase	2360	2977	2125	2487.33
LGG_RS08670	LGG_01800	nrdG	anaerobic ribonucleoside-triphosphate reductase activating protein	901	1005	892	932.667
LGG_RS08675	LGG_01801	copB	ATPase	6657	7270	6895	6940.67
LGG_RS08680	LGG_01802	copY	uracil phosphoribosyltransferase	2403	2930	2760	2697.67
LGG_RS08685	LGG_01803	purD	phosphoribosylamine--glycine ligase	270809	372620	303597	315675
LGG_RS08690	LGG_01805	purH	purine biosynthesis protein purH	266491	360905	298428	308608
LGG_RS08695	LGG_01806	purN	phosphoribosylglycinamide formyltransferase	81525	108042	101905	97157.3
LGG_RS08700	LGG_01807	purM	phosphoribosylaminoimidazole synthetase	175196	229583	235272	213350
LGG_RS08705	LGG_01808	purF	amidophosphoribosyltransferase	214295	284836	289133	262755
LGG_RS08710	LGG_01809	purL	phosphoribosylformylglycinamidine synthase	374065	555770	500211	476682
LGG_RS08715	LGG_01810	purQ	phosphoribosylformylglycinamidine synthase	97222	157702	133835	129586
LGG_RS08720	LGG_01811	purS	phosphoribosylformylglycinamidine synthase	38641	65720	61505	55288.7
LGG_RS08725	LGG_01812	purC	phosphoribosylaminoimidazole-succinocarboxamide synthase	105563	179839	169237	151546
LGG_RS08730	LGG_01813	purK	phosphoribosylaminoimidazole carboxylase	154126	289425	259110	234220
LGG_RS08735	LGG_01814	purE	N5-carboxyaminoimidazole ribonucleotide mutase	23612	44062	35636	34436.7
LGG_RS08740	LGG_01815	NO NAME	thiamine transporter ThiT	1033	1115	814	987.333
LGG_RS08745	LGG_01817	iolT	MFS transporter	2059	3955	3030	3014.67
LGG_RS08750	not predicted	NO NAME	alpha-galactosidase	230	165	265	220
LGG_RS08755	LGG_01820	ptsI	phosphoenolpyruvate-protein phosphotransferase	228259	201747	186286	205431
LGG_RS08760	LGG_01821	ptsH	phosphocarrier protein HPr	53913	48187	54029	52043
LGG_RS08765	LGG_01822	NO NAME	hypothetical protein	10118	11326	11354	10932.7
LGG_RS08770	LGG_01823	clpE	ATP-dependent Clp protease ATP-binding protein	45492	57850	58024	53788.7
LGG_RS08775	LGG_01824	NO NAME	hypothetical protein	391	431	371	397.667
LGG_RS08780	LGG_01825	prfC	peptide chain release factor 3	5055	5406	4424	4961.67
LGG_RS08785	LGG_01826	hlyX	hypothetical protein	1817	2072	1554	1814.33
LGG_RS08790	LGG_01827	yueF	membrane protein	1343	1466	1213	1340.67
LGG_RS08795	LGG_01828	elaA	GNAT family acetyltransferase	338	464	284	362
LGG_RS08800	LGG_01829	NO NAME	hypothetical protein	1520	1726	1219	1488.33
LGG_RS08805	LGG_01830	groEL	hypothetical protein	995	1129	831	985
LGG_RS08810	LGG_01831	recX	recombinase RecX	910	1030	842	927.333
LGG_RS08815	LGG_01832	NO NAME	transcriptional regulator	2584	2731	2173	2496
LGG_RS08820	LGG_01833	NO NAME	hypothetical protein	707	832	620	719.667
LGG_RS08825	LGG_01834	rumA	RNA methyltransferase	3146	3818	2601	3188.33
LGG_RS08830	LGG_01835	NO NAME	nucleoside 2-deoxyribosyltransferase	1127	1337	901	1121.67
LGG_RS08835	LGG_01836	spxB	pyruvate oxidase	4289	2159	2319	2922.33
LGG_RS08840	LGG_01837	mvaS	hydroxymethylglutaryl-CoA synthase	16001	15009	11157	14055.7
LGG_RS08845	LGG_01838	mvaA	hydroxymethylglutaryl-CoA reductase	10935	10204	7762	9633.67
LGG_RS08850	LGG_01839	phbA	3-ketoacyl-CoA thiolase	13828	12625	10297	12250
LGG_RS08855	LGG_01840	NO NAME	hypothetical protein	709	712	636	685.667
LGG_RS08860	LGG_01841	pepQ	sugar phosphate isomerase	1444	1447	1159	1350
LGG_RS08865	LGG_01842	NO NAME	MFS transporter	1364	1453	1263	1360
LGG_RS08870	LGG_01845	NO NAME	aldose 1-epimerase	2783	1616	2212	2203.67
LGG_RS08875	LGG_01846	dapE	acetylornithine deacetylase	3932	3946	3506	3794.67
LGG_RS08880	LGG_01847	NO NAME	membrane protein	1157	1146	1013	1105.33
LGG_RS08885	LGG_01848	NO NAME	hypothetical protein	0	0	0	0
LGG_RS08890	LGG_02979	tRNA-Leu	tRNA-Leu	28	24	19	23.6667
LGG_RS08895	LGG_01849	NO NAME	GNAT family acetyltransferase	364	421	285	356.667
LGG_RS08900	LGG_01850	ydcK	sprT-like	236	248	187	223.667
LGG_RS08905	LGG_01851	NO NAME	phosphonate ABC transporter ATP-binding protein	208	217	172	199
LGG_RS08910	LGG_01852	ABC-MSP	branched-chain amino acid ABC transporter permease	90	96	119	101.667
LGG_RS08915	LGG_01853	ABC-SBP	peptide ABC transporter substrate-binding protein	178	144	150	157.333
LGG_RS08920	LGG_01854	NO NAME	hypothetical protein	1621	1694	1398	1571
LGG_RS08925	LGG_01855	pacL	ATPase	10634	10609	9200	10147.7
LGG_RS08930	LGG_01857	pbpX	serine hydrolase	1150	1405	1302	1285.67
LGG_RS08935	LGG_01858	nadE	NAD synthetase	3848	4098	3761	3902.33
LGG_RS08940	LGG_01859	pbpX	serine hydrolase	8117	8220	8832	8389.67
LGG_RS08945	LGG_01860	pncB	nicotinate phosphoribosyltransferase	14555	14834	17625	15671.3
LGG_RS08950	LGG_01861	def	GntR family transcriptional regulator	13169	13027	14948	13714.7
LGG_RS08955	LGG_01862	nagA	N-acetylglucosamine-6-phosphate deacetylase	24300	23828	32585	26904.3
LGG_RS08960	LGG_01863	proC	pyrroline-5-carboxylate reductase	5087	5430	5742	5419.67
LGG_RS08965	LGG_01864	yuxL	peptidase S9	28482	29036	31774	29764
LGG_RS08970	LGG_01865	NO NAME	matrix-binding protein	4856	4308	3156	4106.67
LGG_RS08975	LGG_01866	NO NAME	hypothetical protein	400	468	441	436.333
LGG_RS08980	LGG_02996	tRNA-Tyr	tRNA-Tyr	46	36	14	32
LGG_RS08985	LGG_01867	NO NAME	phosphohydrolase	500	501	417	472.667
LGG_RS08990	LGG_01868	dtpT	peptide ABC transporter permease	1106	952	872	976.667
LGG_RS08995	LGG_01869	salX	sulfate ABC transporter ATP-binding protein	2832	3207	2320	2786.33
LGG_RS09000	LGG_01870	NO NAME	hypothetical protein	261	288	232	260.333
LGG_RS09005	LGG_01871	NO NAME	hypothetical protein	42	64	72	59.3333
LGG_RS09010	LGG_01872	NO NAME	melibiose symporter	2875	3104	2654	2877.67
LGG_RS09015	LGG_01874	NO NAME	alpha-L-fucosidase	6115	6646	5084	5948.33
LGG_RS09020	LGG_01875	NO NAME	glutaredoxin	563	439	390	464
LGG_RS09025	LGG_01876	pck	phosphoenolpyruvate carboxykinase	5189	5218	4615	5007.33
LGG_RS09030	LGG_01878	feoB	ferrous iron transporter B	6635	8671	6726	7344
LGG_RS09035	LGG_01879	feoA	iron transporter FeoA	2266	2809	2432	2502.33
LGG_RS09040	LGG_01880	NO NAME	acyltransferase	2462	2703	2170	2445
LGG_RS09045	LGG_01881	NO NAME	uridine kinase	302	350	228	293.333
LGG_RS09050	LGG_02980	tRNA-Glu	tRNA-Glu	16	26	12	18
LGG_RS09055	LGG_02981	tRNA-Thr	tRNA-Thr	191	120	71	127.333
LGG_RS09060	LGG_01882	ywnB	NADH-flavin reductase	4569	5191	4729	4829.67
LGG_RS09065	LGG_01883	NO NAME	hypothetical protein	4821	5516	5055	5130.67
LGG_RS09070	LGG_01884	NO NAME	hypothetical protein	632	548	478	552.667
LGG_RS09075	LGG_02995	tRNA-Asn	tRNA-Asn	10	7	4	7
LGG_RS09080	LGG_03011	5S rRNA	5S ribosomal RNA	0	0	0	0
LGG_RS09085	LGG_03006	23S rRNA	23S ribosomal RNA	0	0	0	0
LGG_RS09090	LGG_02994	tRNA-Ala	tRNA-Ala	71	37	23	43.6667
LGG_RS09095	LGG_02993	tRNA-Ile	tRNA-Ile	272	150	96	172.667
LGG_RS09100	LGG_03016	16S rRNA	16S ribosomal RNA	0	0	0	0
LGG_RS09105	LGG_01893	serS	seryl-tRNA synthetase	16333	18927	17794	17684.7
LGG_RS09110	not predicted	NO NAME	hypothetical protein	3769	3799	4526	4031.33
LGG_RS09115	LGG_01894	NO NAME	transcriptional regulator	2107	2017	1621	1915
LGG_RS09120	LGG_01895	NO NAME	transcriptional regulator	1883	2079	1636	1866
LGG_RS09125	LGG_01896	lysP	gamma-aminobutyrate permease	617	527	407	517
LGG_RS09130	LGG_01898	alsD	alpha-acetolactate decarboxylase	13898	6108	9304	9770
LGG_RS09135	LGG_01899	alsS	acetolactate synthase	26223	11226	17016	18155
LGG_RS09140	LGG_01900	NO NAME	hypothetical protein	274	649	396	439.667
LGG_RS09145	LGG_01901	NO NAME	acetyltransferase	139	102	92	111
LGG_RS09150	LGG_01902	NO NAME	cell surface protein	173	180	146	166.333
LGG_RS09155	LGG_01903	NO NAME	hypothetical protein	4425	4818	4212	4485
LGG_RS09160	LGG_01904	rpmG	50S ribosomal protein L33	2894	2904	2124	2640.67
LGG_RS09165	LGG_01905	NO NAME	cell division protein Fic	381	363	270	338
LGG_RS09170	LGG_01906	rluD	pseudouridylate synthase	828	696	426	650
LGG_RS09175	LGG_01907	NO NAME	esterase	4268	4552	3511	4110.33
LGG_RS09180	LGG_01908	NO NAME	hypothetical protein	21987	22957	19027	21323.7
LGG_RS09185	LGG_01909	NO NAME	phage infection protein	186	188	128	167.333
LGG_RS09190	LGG_01910	citG	triphosphoribosyl-dephospho-CoA synthase	886	892	776	851.333
LGG_RS09195	LGG_01911	citG	GntR family transcriptional regulator	450	446	544	480
LGG_RS09200	LGG_01912	oadA	oxaloacetate decarboxylase	502	537	518	519
LGG_RS09205	LGG_01913	citX	2-(5''-triphosphoribosyl)-3'-dephospho-CoA synthase	284	342	246	290.667
LGG_RS09210	LGG_01914	citF	citrate lyase subunit alpha	695	670	583	649.333
LGG_RS09215	LGG_01915	citE	citrate lyase	400	346	338	361.333
LGG_RS09220	LGG_01916	citD	citrate lyase subunit gamma	140	147	141	142.667
LGG_RS09225	LGG_01917	citC	[citrate [pro-3S]-lyase] ligase	302	331	309	314
LGG_RS09230	not predicted	NO NAME	hypothetical protein	60	52	43	51.6667
LGG_RS09235	LGG_01918	oadB	glutaconyl-CoA decarboxylase subunit beta	521	470	480	490.333
LGG_RS09240	LGG_01919	oadG	biotin carboxyl carrier protein	108	105	123	112
LGG_RS09245	LGG_01920	NO NAME	hypothetical protein	92	95	120	102.333
LGG_RS09250	LGG_01921	citM	citrate transporter	44	45	42	43.6667
LGG_RS09255	LGG_01922	NO NAME	hypothetical protein	488	488	372	449.333
LGG_RS09260	LGG_01923	kptA	RNA 2'-phosphotransferase	293	288	247	276
LGG_RS09265	LGG_01924	yveC	GNAT family acetyltransferase	303	342	328	324.333
LGG_RS09270	LGG_01925	NO NAME	NADP oxidoreductase	208	225	279	237.333
LGG_RS09275	LGG_01926	NO NAME	PadR family transcriptional regulator	104	138	114	118.667
LGG_RS09280	LGG_01927	NO NAME	membrane protein	205	240	217	220.667
LGG_RS09285	LGG_01929	nfsA	nitroreductase	1423	1557	1164	1381.33
LGG_RS09290	LGG_01930	ecsA	ABC transporter ATP-binding protein	1641	1766	1391	1599.33
LGG_RS09295	LGG_01931	NO NAME	ABC transporter permease	1403	1641	1180	1408
LGG_RS09300	LGG_01932	NO NAME	transcriptional regulator	763	918	693	791.333
LGG_RS09305	LGG_01933	NO NAME	MFS transporter	595	958	596	716.333
LGG_RS09310	LGG_01934	NO NAME	permease	133	149	184	155.333
LGG_RS09315	LGG_01935	NO NAME	XRE family transcriptional regulator	1101	1180	1063	1114.67
LGG_RS09320	LGG_01936	NO NAME	alpha/beta hydrolase	458	502	315	425
LGG_RS09325	LGG_01937	gntR	GntR family transcriptional regulator	192	218	227	212.333
LGG_RS09330	LGG_01938	NO NAME	ABC transporter ATP-binding protein	473	468	425	455.333
LGG_RS09335	LGG_01939	NO NAME	ABC transporter permease	597	735	469	600.333
LGG_RS09340	LGG_01940	oppF	peptide ABC transporter ATP-binding protein	10048	14985	11317	12116.7
LGG_RS09345	LGG_01941	oppD	peptide ABC transporter ATP-binding protein	12040	17685	13982	14569
LGG_RS09350	LGG_01942	NO NAME	hypothetical protein	3011	4486	3519	3672
LGG_RS09355	LGG_01943	oppC	diguanylate cyclase	7495	10693	8405	8864.33
LGG_RS09360	LGG_01944	oppB	peptide ABC transporter permease	8077	11314	8895	9428.67
LGG_RS09365	LGG_01945	oppA	peptide ABC substrate-binding protein	20494	29443	25528	25155
LGG_RS09370	LGG_01946	NO NAME	hypothetical protein	180	105	119	134.667
LGG_RS09375	LGG_01947	NO NAME	ABC transporter ATP-binding protein	48	38	33	39.6667
LGG_RS09380	LGG_01948	NO NAME	ABC transporter ATP-binding protein	40	38	26	34.6667
LGG_RS09385	LGG_01949	NO NAME	hypothetical protein	1213	883	1700	1265.33
LGG_RS09390	LGG_01950	NO NAME	type III restriction endonuclease subunit R	1320	934	878	1044
LGG_RS09395	LGG_01951	NO NAME	aminoglycoside phosphotransferase	143	172	102	139
LGG_RS09400	LGG_01952	NO NAME	peptidase M10	542	599	467	536
LGG_RS09405	LGG_01953	NO NAME	peptidoglycan-binding protein LysM	11561	9028	14651	11746.7
LGG_RS09410	LGG_01954	lciIC	XRE family transcriptional regulator	82	79	73	78
LGG_RS09415	LGG_01955	NO NAME	reverse transcriptase	4091	5234	4203	4509.33
LGG_RS09425	pseudo-gene	NO NAME	transposase	0	0	0	0
LGG_RS09430	not predicted	NO NAME	transposase	107	137	100	114.667
LGG_RS09435	LGG_01959	is50	transposase	134	156	91	127
LGG_RS09440	not predicted	NO NAME	transposase	184	177	154	171.667
LGG_RS09445	LGG_01960	NO NAME	hypothetical protein	2	4	2	2.66667
LGG_RS09450	LGG_01961	is51	transposase	17	15	8	13.3333
LGG_RS09455	LGG_01962	NO NAME	transposase	64	49	46	53
LGG_RS09460	LGG_01963	NO NAME	hypothetical protein	106	97	85	96
LGG_RS09465	LGG_01964	NO NAME	hypothetical protein	284	397	366	349
LGG_RS09470	LGG_01965	is52	transposase	4	7	4	5
LGG_RS09475	pseudo-gene	NO NAME	terminase	48	42	47	45.6667
LGG_RS09480	not predicted	NO NAME	hypothetical protein	280	268	254	267.333
LGG_RS09485	LGG_01968	guaA	GMP synthase	23640	30757	20971	25122.7
LGG_RS09490	LGG_01969	coaA	type I pantothenate kinase	3511	2980	2665	3052
LGG_RS09495	LGG_01970	NO NAME	hypothetical protein	249	174	148	190.333
LGG_RS09500	LGG_01971	NO NAME	hypothetical protein	228	186	134	182.667
LGG_RS09505	LGG_01972	pepD	peptidase U34	12245	12642	9119	11335.3
LGG_RS09510	LGG_01974	ykhA	acyl-CoA hydrolase	239	185	282	235.333
LGG_RS09515	LGG_01975	rep	ATP-dependent DNA helicase	2778	2591	2808	2725.67
LGG_RS09520	LGG_01976	NO NAME	hypothetical protein	35	29	38	34
LGG_RS09525	LGG_01977	NO NAME	Tat pathway signal protein	72	73	80	75
LGG_RS09530	LGG_01978	napA	potassium transporter	3970	4998	3962	4310
LGG_RS09535	LGG_01979	pepR	prolyl aminopeptidase	28935	31423	25949	28769
LGG_RS09540	LGG_01980	yjhE	phage tail protein	5290	5958	4069	5105.67
LGG_RS09545	LGG_01981	mntH	manganese transporter	1466	1425	1214	1368.33
LGG_RS09550	LGG_01982	hemH	ferrochelatase	634	640	519	597.667
LGG_RS09555	LGG_01983	pgm	fructose 2%2C6-bisphosphatase	890	923	857	890
LGG_RS09560	LGG_01984	rhaD	rhamnulose-1-phosphate aldolase	132	114	136	127.333
LGG_RS09565	LGG_01985	NO NAME	ABC transporter permease	1982	3003	2011	2332
LGG_RS09570	LGG_01986	vraD	bacitracin ABC transporter ATP-binding protein	828	1228	789	948.333
LGG_RS09575	LGG_01987	NO NAME	amino acid permease	256	591	254	367
LGG_RS09580	LGG_01988	NO NAME	diacylglycerol kinase	457	538	455	483.333
LGG_RS09585	LGG_01989	hflX	GTP-binding protein	13221	14608	12010	13279.7
LGG_RS09590	LGG_01990	NO NAME	deacetylase	445	492	392	443
LGG_RS09595	pseudo-gene	NO NAME	UDP-N-acetylglucosamine 2-epimerase	1909	2206	1872	1995.67
LGG_RS09600	LGG_01993	NO NAME	hypothetical protein	3103	3615	3013	3243.67
LGG_RS09605	LGG_01994	NO NAME	hypothetical protein	4064	4425	3759	4082.67
LGG_RS09610	LGG_01995	NO NAME	hypothetical protein	2143	2236	2499	2292.67
LGG_RS09615	LGG_01996	rmlD	dTDP-4-dehydrorhamnose reductase	58507	55933	51540	55326.7
LGG_RS09620	LGG_01997	rmlB	dTDP-glucose 4%2C6-dehydratase	59879	56915	54373	57055.7
LGG_RS09625	LGG_01998	rmlC	dTDP-4-dehydrorhamnose 3%2C5-epimerase	23454	22363	22037	22618
LGG_RS09630	LGG_01999	rmlA	glucose-1-phosphate thymidylyltransferase	25901	24839	22563	24434.3
LGG_RS09635	LGG_02000	NO NAME	Lyzozyme M1 (1%2C4-beta-N-acetylmuramidase)	166	189	136	163.667
LGG_RS09640	LGG_02001	NO NAME	hypothetical protein	961	1009	751	907
LGG_RS09645	LGG_02002	NO NAME	hypothetical protein	444	480	374	432.667
LGG_RS09650	LGG_02003	is53	transposase	82	65	60	69
LGG_RS09655	LGG_02004	eps3	UDP-phosphate galactose phosphotransferase	9097	11099	8280	9492
LGG_RS09660	LGG_02005	galE	epimerase	6260	6893	5475	6209.33
LGG_RS09665	LGG_02006	glnP	glutamine ABC transporter permease	700	642	485	609
LGG_RS09670	LGG_02007	glnP	glutamine ABC transporter permease	1186	1189	892	1089
LGG_RS09675	LGG_02008	glnH	glutamine ABC transporter substrate-binding protein	1567	1635	1251	1484.33
LGG_RS09680	LGG_02009	glnQ	arginine ABC transporter ATP-binding protein	960	997	610	855.667
LGG_RS09685	LGG_02010	NO NAME	hypothetical protein	6053	6601	4939	5864.33
LGG_RS09690	LGG_02011	NO NAME	hypothetical protein	4477	4617	3755	4283
LGG_RS09695	LGG_02012	fur	Fur family transcriptional regulator	799	813	648	753.333
LGG_RS09700	LGG_02014	gmk	guanylate kinase	2210	2143	1593	1982
LGG_RS09705	LGG_02015	NO NAME	GNAT family acetyltransferase	506	489	368	454.333
LGG_RS09710	LGG_02016	NO NAME	hypothetical protein	13912	16537	13574	14674.3
LGG_RS09715	LGG_02017	tyrS	tyrosyl-tRNA synthetase	1804	1687	1961	1817.33
LGG_RS09720	LGG_02019	NO NAME	cobalt transporter	411	405	328	381.333
LGG_RS09725	LGG_02020	NO NAME	ArsR family transcriptional regulator	93	118	85	98.6667
LGG_RS09730	LGG_02021	apbE	membrane protein	1262	1290	1085	1212.33
LGG_RS09735	LGG_02022	amy	amylopullulanase	3610	3217	2324	3050.33
LGG_RS09740	LGG_02023	glgP	glycogen phosphorylase	6741	6231	4747	5906.33
LGG_RS09745	LGG_02024	glgA	glycogen synthase	4066	3922	3332	3773.33
LGG_RS09750	LGG_02025	glgD	glucose-1-phosphate adenylyltransferase	2392	2205	1922	2173
LGG_RS09755	LGG_02026	glgC	glucose-1-phosphate adenylyltransferase	1564	1401	1354	1439.67
LGG_RS09760	LGG_02027	glgB	glycogen-branching protein	2211	1769	1934	1971.33
LGG_RS09765	LGG_02028	ilvE	branched-chain amino acid aminotransferase	2980	3076	2171	2742.33
LGG_RS09770	LGG_02030	NO NAME	cell surface protein	169	71	87	109
LGG_RS09775	LGG_02031	NO NAME	membrane protein	2014	520	1022	1185.33
LGG_RS09780	LGG_02032	fbp	fructose 1%2C6-bisphosphatase	4958	1213	2413	2861.33
LGG_RS09785	LGG_02033	is54	transposase	0	0	1	0.333333
LGG_RS09790	LGG_02034	spxA	arsenate reductase	3080	2036	1936	2350.67
LGG_RS09795	LGG_02035	clpL	ATP-dependent Clp protease ATP-binding protein	4736	4168	4507	4470.33
LGG_RS09800	LGG_02036	wzb	tyrosine protein phosphatase	4083	2934	4353	3790
LGG_RS09805	LGG_02037	wzr1	transcriptional regulator	12972	13023	9442	11812.3
LGG_RS09810	LGG_02038	rmlB	dTDP-glucose 4%2C6-dehydratase	1995	2117	1469	1860.33
LGG_RS09815	LGG_02039	rmlC	dTDP-4-dehydrorhamnose 3%2C5-epimerase	957	1032	807	932
LGG_RS09820	LGG_02040	rmlA1	glucose-1-phosphate thymidylyltransferase	583	666	448	565.667
LGG_RS09825	LGG_02041	is55	transposase	0	0	0	0
LGG_RS09830	LGG_02042	rmlA2	glucose-1-phosphate thymidylyltransferase	460	482	526	489.333
LGG_RS09835	LGG_02043	welE	multidrug MFS transporter	1702	1521	1693	1638.67
LGG_RS09840	LGG_02044	welF	glycosyl transferase family 1	1879	2231	1728	1946
LGG_RS09845	LGG_02045	welG	glycosyl transferase	2390	2676	1775	2280.33
LGG_RS09850	LGG_02046	welH	alpha-L-Rha alpha-1%2C3-L-rhamnosyltransferase	3215	3633	2462	3103.33
LGG_RS09855	LGG_02047	WelI	glycosyl transferase family 1	3574	3980	3014	3522.67
LGG_RS09860	LGG_02048	welJ	glycosyl transferase	1820	1801	1302	1641
LGG_RS09865	LGG_02049	wzx	polysaccharide transporter protein	4820	5378	3604	4600.67
LGG_RS09870	LGG_02050	glf	UDP-galactopyranose mutase	6714	7463	5319	6498.67
LGG_RS09875	LGG_02051	NO NAME	polymerase	5589	6180	4194	5321
LGG_RS09880	LGG_02052	wze	exopolysaccharide biosynthesis protein	8055	9112	7076	8081
LGG_RS09885	LGG_02053	wzd	capsular polysaccharide biosynthesis protein	5191	5597	4800	5196
LGG_RS09890	LGG_02054	NO NAME	acyltransferase	806	868	666	780
LGG_RS09895	LGG_02055	NO NAME	hypothetical protein	1461	1677	1335	1491
LGG_RS09900	LGG_02056	NO NAME	hypothetical protein	350	285	280	305
LGG_RS09905	LGG_02057	ccl	membrane protein	3114	3098	2196	2802.67
LGG_RS09910	LGG_02058	fabG	3-ketoacyl-ACP reductase	1418	1726	1158	1434
LGG_RS09915	LGG_02059	yiaA	hypothetical protein	410	412	315	379
LGG_RS09920	LGG_02060	bcnIC	XRE family transcriptional regulator	135	98	87	106.667
LGG_RS09925	LGG_02061	gpm	phosphoglycerate mutase	1330	1054	1151	1178.33
LGG_RS09930	LGG_02062	oppF	peptide ABC transporter substrate-binding protein	10990	10194	7169	9451
LGG_RS09935	LGG_02063	oppD	peptide ABC transporter ATP-binding protein	11737	10916	7390	10014.3
LGG_RS09940	LGG_02064	oppC	peptide ABC transporter permease	9417	8976	5931	8108
LGG_RS09945	LGG_02065	oppB	peptide ABC transporter permease	11197	10367	6976	9513.33
LGG_RS09950	LGG_02066	oppA	peptide ABC transporter substrate-binding protein	30922	27926	18657	25835
LGG_RS09955	LGG_02067	NO NAME	MFS transporter	456	429	413	432.667
LGG_RS09960	LGG_02068	efp	elongation factor P	6357	7326	6836	6839.67
LGG_RS09965	LGG_02069	yrjD	hypothetical protein	10239	9513	9125	9625.67
LGG_RS09970	LGG_02070	ykgF	amino acid dehydrogenase	15001	13779	13280	14020
LGG_RS09975	LGG_02071	ykgE	Fe-S oxidoreductase	5222	4853	4144	4739.67
LGG_RS09980	LGG_02073	NO NAME	hypothetical protein	1442	1409	1842	1564.33
LGG_RS09985	LGG_02074	celC	PTS cellobiose transporter subunit IIA	76	90	72	79.3333
LGG_RS09990	LGG_02075	ybhE	hypothetical protein	162	170	157	163
LGG_RS09995	LGG_02076	NO NAME	hypothetical protein	72	68	69	69.6667
LGG_RS10000	LGG_02078	celB	PTS cellobiose transporter subunit IIC	99	99	89	95.6667
LGG_RS10005	LGG_02079	melA	alpha-galactosidase	3556	4585	3148	3763
LGG_RS10010	LGG_02080	yaaA	hypothetical protein	1065	1258	900	1074.33
LGG_RS10015	LGG_02081	NO NAME	LytTR family transcriptional regulator	136	111	82	109.667
[truncated: 818 more rows]

## Sheet: GG OD7 counts
Gene	Old locus tag	Gene name	Gene product	Repl1	Repl2	Repl3	Mean
LGG_RS00005	LGG_00001	dnaA	chromosomal replication initiator protein DnaA	7030	6754	6490	6758
LGG_RS00010	LGG_00002	dnaN	DNA polymerase III subunit beta	13619	12113	12542	12758
LGG_RS00015	LGG_00003	yaaA	RNA-binding protein	409	368	364	380.333
LGG_RS00020	LGG_00004	recF	DNA recombination protein RecF	3176	2829	2671	2892
LGG_RS00025	LGG_00005	gyrB	DNA gyrase subunit B	12398	11528	10980	11635.3
LGG_RS00030	LGG_00006	gyrA	DNA gyrase subunit A	18417	19006	18552	18658.3
LGG_RS00035	not predicted	NO NAME	hypothetical protein	6	3	5	4.66667
LGG_RS00040	LGG_00008	NO NAME	hypothetical protein	24	13	7	14.6667
LGG_RS00050	LGG_00009	NO NAME	hypothetical protein	53	43	37	44.3333
LGG_RS00055	not predicted	NO NAME	deoxyribose-phosphate aldolase	72	42	41	51.6667
LGG_RS00060	LGG_00010	ssb1	single-stranded DNA-binding protein	61	45	37	47.6667
LGG_RS00065	LGG_00011	rpsF	30S ribosomal protein S6	11560	8958	9419	9979
LGG_RS00070	LGG_00012	ssb2	single-stranded DNA-binding protein	15203	12269	15255	14242.3
LGG_RS00075	LGG_00013	rpsR	30S ribosomal protein S18	9395	7515	8348	8419.33
LGG_RS00080	LGG_00015	pfpI	general stress protein	4645	4072	4079	4265.33
LGG_RS00085	LGG_00016	cydA	cytochrome D ubiquinol oxidase subunit I	366	338	344	349.333
LGG_RS00090	LGG_00017	cydB	cytochrome C oxidase assembly protein	263	256	251	256.667
LGG_RS00095	LGG_00018	NO NAME	hypothetical protein	67	67	86	73.3333
LGG_RS00100	LGG_00020	is1	transposase	0	0	0	0
LGG_RS00105	LGG_00021	NO NAME	abortive infection protein	71	80	67	72.6667
LGG_RS00110	LGG_00022	is2	transposase	2	0	2	1.33333
LGG_RS00115	LGG_00023	NO NAME	membrane protein	39	46	45	43.3333
LGG_RS00120	LGG_00024	NO NAME	hypothetical protein	52	55	52	53
LGG_RS00125	LGG_00025	NO NAME	ABC transporter	26	14	16	18.6667
LGG_RS00130	LGG_00026	is3	transposase	0	0	0	0
LGG_RS00135	LGG_00027	NO NAME	hypothetical protein	105	111	86	100.667
LGG_RS00140	LGG_00028	NO NAME	ABC transporter ATP-binding protein	132	95	100	109
LGG_RS00145	LGG_00029	NO NAME	ammonium transporter	21	17	14	17.3333
LGG_RS00150	LGG_00030	NO NAME	hypothetical protein	35	35	25	31.6667
LGG_RS00155	LGG_00031	p40	hypothetical protein	772	851	715	779.333
LGG_RS00160	LGG_00032	NO NAME	peptide ABC transporter permease	356	405	358	373
LGG_RS00165	LGG_00033	ABC-NBD	macrolide ABC transporter ATP-binding protein	58	57	48	54.3333
LGG_RS00170	LGG_00034	NO NAME	TetR family transcriptional regulator	1042	927	861	943.333
LGG_RS00175	LGG_00035	NO NAME	haloacid dehalogenase	1750	1591	1607	1649.33
LGG_RS00180	LGG_00036	NO NAME	hypothetical protein	458	414	468	446.667
LGG_RS00185	LGG_00037	NO NAME	permease	921	947	897	921.667
LGG_RS00190	LGG_00038	NO NAME	membrane protein	476	416	438	443.333
LGG_RS00195	LGG_00039	maa	maltose O-acetyltransferase	996	889	1018	967.667
LGG_RS00200	LGG_00040	NO NAME	hypothetical protein	735	669	674	692.667
LGG_RS00205	LGG_00041	pepD	peptidase C69	16247	14432	15237	15305.3
LGG_RS00210	LGG_00042	NO NAME	membrane protein	368	299	331	332.667
LGG_RS00215	LGG_00043	NO NAME	hypothetical protein	120	130	85	111.667
LGG_RS00220	not predicted	NO NAME	hypothetical protein	140	145	114	133
LGG_RS00225	not predicted	NO NAME	hypothetical protein	111	95	93	99.6667
LGG_RS00230	not predicted	NO NAME	glycosyl hydrolase family 25	47	53	41	47
LGG_RS00235	not predicted	NO NAME	hypothetical protein	62	101	80	81
LGG_RS00240	LGG_00047	NO NAME	hypothetical protein	100	94	72	88.6667
LGG_RS00245	LGG_00048	azlC	azaleucine resistance protein AzlC	35	42	39	38.6667
LGG_RS00250	LGG_00049	NO NAME	branched-chain amino acid ABC transporter	18	19	27	21.3333
LGG_RS00255	LGG_00050	uidA	beta-glucuronidase	67	76	51	64.6667
LGG_RS00260	LGG_00051	galC	glycoside hydrolase	265	282	229	258.667
LGG_RS00265	LGG_00052	eda	ketohydroxyglutarate aldolase	966	1068	996	1010
LGG_RS00270	LGG_00053	kdgK	2-dehydro-3-deoxygluconokinase	977	979	912	956
LGG_RS00275	pseudo-gene	NO NAME	glucuronate isomerase	2882	2803	2641	2775.33
LGG_RS00280	LGG_00056	uxuA	mannonate dehydratase	1614	1629	1361	1534.67
LGG_RS00285	LGG_00057	uxuB	dioxygenase	1204	1238	1055	1165.67
LGG_RS00290	LGG_00058	NO NAME	transporter	193	207	176	192
LGG_RS00295	LGG_00059	kdgR	GntR family transcriptional regulator	728	620	631	659.667
LGG_RS00300	LGG_00060	kdfK	2-dehydro-3-deoxygluconokinase	454	424	429	435.667
LGG_RS00305	LGG_00061	NO NAME	galactosidase	1334	1232	1219	1261.67
LGG_RS00310	LGG_00062	NO NAME	hypothetical protein	145	110	128	127.667
LGG_RS00315	LGG_00063	NO NAME	FMN-binding protein	502	482	489	491
LGG_RS00320	LGG_00064	ypiB	MFS transporter permease	355	346	331	344
LGG_RS00325	LGG_00065	aes	alpha/beta hydrolase	42	55	42	46.3333
LGG_RS00330	LGG_00066	NO NAME	TetR family transcriptional regulator	141	116	147	134.667
LGG_RS00335	LGG_00067	NO NAME	hypothetical protein	56	47	55	52.6667
LGG_RS00340	LGG_00068	NO NAME	membrane protein	1097	1162	859	1039.33
LGG_RS00345	LGG_00069	NO NAME	TetR family transcriptional regulator	94	118	109	107
LGG_RS00350	LGG_00070	NO NAME	hypothetical protein	3669	3476	3291	3478.67
LGG_RS00355	LGG_00071	NO NAME	amidohydrolase	8495	8468	7478	8147
LGG_RS00360	LGG_00072	NO NAME	membrane protein	2424	2421	2639	2494.67
LGG_RS00365	LGG_00073	NO NAME	membrane protein	5789	6079	5847	5905
LGG_RS00370	LGG_00074	NO NAME	hypothetical protein	69	50	62	60.3333
LGG_RS00375	LGG_00075	opuCd	amino acid ABC transporter permease	8864	9701	8866	9143.67
LGG_RS00380	LGG_00076	opuCc	glycine/betaine ABC transporter substrate-binding protein	12721	13771	12554	13015.3
LGG_RS00385	LGG_00077	opuCb	choline ABC transporter permease	6401	6914	7308	6874.33
LGG_RS00390	LGG_00078	opuCa	glycine/betaine ABC transporter ATP-binding protein	18513	18935	17736	18394.7
LGG_RS00395	LGG_00079	NO NAME	hypothetical protein	49	66	72	62.3333
LGG_RS00400	LGG_00080	zntR	MerR family transcriptional regulator	91	88	73	84
LGG_RS00405	LGG_00081	NO NAME	hypothetical protein	185	174	153	170.667
LGG_RS00410	LGG_00082	cadA	metal-transporting ATPase	80	84	83	82.3333
LGG_RS00415	LGG_00083	copZ	hypothetical protein	44	47	50	47
LGG_RS00420	LGG_00084	NO NAME	DNA-binding protein	153	154	143	150
LGG_RS00425	LGG_00085	flp	transcriptional regulator	362	356	369	362.333
LGG_RS00430	LGG_00086	NO NAME	TetR family transcriptional regulator	57	43	46	48.6667
LGG_RS00435	LGG_00087	NO NAME	membrane protein	25	24	31	26.6667
LGG_RS00440	LGG_00088	NO NAME	hypothetical protein	22	28	27	25.6667
LGG_RS00445	LGG_00089	NO NAME	membrane protein	59	61	41	53.6667
LGG_RS00450	pseudo-gene	NO NAME	PTS fructose transporter subunit IIB	27	29	24	26.6667
LGG_RS00455	LGG_00092	frvA	PTS cellobiose transporter subunit IIA	14	12	17	14.3333
LGG_RS00460	LGG_00093	NO NAME	alpha-mannosidase	59	55	56	56.6667
LGG_RS00465	LGG_00094	NO NAME	transcriptional regulator	55	43	50	49.3333
LGG_RS00470	LGG_00095	bglB	6-phospho-beta-glucosidase	72	64	66	67.3333
LGG_RS00475	LGG_00096	glk	ROK family transcriptional regulator	23	20	24	22.3333
LGG_RS00480	LGG_00098	trpA	tryptophan synthase subunit alpha	37	37	43	39
LGG_RS00485	LGG_00099	trpB	tryptophan synthase subunit beta	70	62	54	62
LGG_RS00490	LGG_00100	trpF	N-(5'-phosphoribosyl)anthranilate isomerase	17	19	13	16.3333
LGG_RS00495	LGG_00101	trpC	indole-3-glycerol-phosphate synthase	40	49	37	42
LGG_RS00500	LGG_00102	trpD	anthranilate phosphoribosyltransferase	21	18	16	18.3333
LGG_RS00505	not predicted	NO NAME	hypothetical protein	5	5	4	4.66667
LGG_RS00510	LGG_00104	NO NAME	MFS transporter permease	20	28	15	21
LGG_RS00515	LGG_00105	NO NAME	TetR family transcriptional regulator	132	109	102	114.333
LGG_RS00520	LGG_00106	NO NAME	hypothetical protein	165	149	141	151.667
LGG_RS00525	pseudo-gene	NO NAME	AbrB family transcriptional regulator	48	34	44	42
LGG_RS00530	LGG_00107	rmlC	dTDP-4-dehydrorhamnose 3%2C5-epimerase	420	451	437	436
LGG_RS00535	LGG_00108	dapB	4-hydroxy-tetrahydrodipicolinate reductase	4627	4538	4416	4527
LGG_RS00540	LGG_00109	dapA	4-hydroxy-tetrahydrodipicolinate synthase	7775	7741	7004	7506.67
LGG_RS00545	LGG_00110	hipO	acetyldiaminopimelate deacetylase	8504	8254	8247	8335
LGG_RS00550	LGG_00111	dapD	2%2C3%2C4%2C5-tetrahydropyridine-2%2C6-carboxylate N-succinyltransferase	3690	3766	3528	3661.33
LGG_RS00555	LGG_00112	lysA	diaminopimelate decarboxylase	4926	4598	4807	4777
LGG_RS00560	LGG_00113	lysC	aspartate kinase	1684	1784	1663	1710.33
LGG_RS00565	LGG_00114	dapF	diaminopimelate epimerase	2513	2382	2349	2414.67
LGG_RS00570	LGG_00115	asd	aspartate-semialdehyde dehydrogenase	2508	2618	2370	2498.67
LGG_RS00575	LGG_00116	NO NAME	hypothetical protein	63	81	71	71.6667
LGG_RS00580	LGG_00117	NO NAME	transcriptional regulator	65	58	50	57.6667
LGG_RS00585	not predicted	NO NAME	hypothetical protein	57	54	41	50.6667
LGG_RS00590	LGG_00118	NO NAME	ADP-ribose pyrophosphatase	23	23	20	22
LGG_RS00595	LGG_00119	NO NAME	peptide ABC transporter ATP-binding protein	124	124	102	116.667
LGG_RS00600	LGG_00120	NO NAME	hypothetical protein	309	273	324	302
LGG_RS00605	LGG_00121	yybT	hypothetical protein	6128	5520	5309	5652.33
LGG_RS00610	LGG_00122	rplI	50S ribosomal protein L9	2602	2579	2461	2547.33
LGG_RS00615	LGG_00123	dnaB	DNA helicase	4132	3872	3566	3856.67
LGG_RS00620	LGG_00124	NO NAME	hypothetical protein	2504	2575	2220	2433
LGG_RS00625	pseudo-gene	NO NAME	permease	58	74	63	65
LGG_RS00630	LGG_00126	murQ	N-acetylmuramic acid 6-phosphate etherase	42	47	45	44.6667
LGG_RS00635	LGG_00127	yleB	hypothetical protein	41	39	32	37.3333
LGG_RS00640	LGG_00128	NO NAME	RpiR family transcriptional regulator	397	381	364	380.667
LGG_RS00645	LGG_00129	NO NAME	TetR family transcriptional regulator	187	164	155	168.667
LGG_RS00650	LGG_00130	psaA	macrolide ABC transporter ATP-binding protein	19	22	25	22
LGG_RS00655	LGG_00131	ileS	ABC transporter permease	167	156	135	152.667
LGG_RS00660	LGG_00132	NO NAME	amidohydrolase	100	94	88	94
LGG_RS00665	LGG_00133	purA	adenylosuccinate synthetase	13129	11526	12849	12501.3
LGG_RS00670	LGG_00135	cadA	metal-transporting ATPase	283	256	324	287.667
LGG_RS00675	LGG_00136	yozA	ArsR family transcriptional regulator	389	395	380	388
LGG_RS00680	LGG_00137	NO NAME	transporter	60	45	53	52.6667
LGG_RS00685	LGG_00138	nrdD	ribonucleoside triphosphate reductase	3513	3103	2803	3139.67
LGG_RS00690	LGG_00139	NO NAME	hypothetical protein	82	74	66	74
LGG_RS00695	LGG_00140	uvrB	membrane protein	2165	1499	1646	1770
LGG_RS00700	not predicted	NO NAME	hypothetical protein	103	98	83	94.6667
LGG_RS00705	not predicted	NO NAME	XRE family transcriptional regulator	239	203	174	205.333
LGG_RS00710	not predicted	NO NAME	hypothetical protein	79	64	70	71
LGG_RS00715	LGG_00143	NO NAME	hypothetical protein	0	0	0	0
LGG_RS00720	LGG_00144	is4	transposase	85	95	106	95.3333
LGG_RS00725	LGG_00145	yveB	phospholipid phosphatase	832	809	897	846
LGG_RS00730	LGG_00146	NO NAME	peptidase S66	1529	1470	1393	1464
LGG_RS00735	LGG_00147	NO NAME	hypothetical protein	100	103	89	97.3333
LGG_RS00740	LGG_00148	ddlA	D-alanine--D-alanine ligase	5815	5488	5311	5538
LGG_RS00745	LGG_00149	NO NAME	hypothetical protein	3	5	9	5.66667
LGG_RS00750	LGG_00150	NO NAME	hypothetical protein	172	153	160	161.667
LGG_RS00755	LGG_00151	NO NAME	MFS transporter	805	734	837	792
LGG_RS00760	LGG_00153	is6	transposase	21	20	33	24.6667
LGG_RS00765	LGG_00154	NO NAME	hypothetical protein	115	88	90	97.6667
LGG_RS00770	LGG_00155	baeS	two-component system sensor histidine kinase	743	741	641	708.333
LGG_RS00775	LGG_00156	beaR	two-component system response regulator	352	373	340	355
LGG_RS00780	LGG_00157	ogt	methylated-DNA--protein-cysteine methyltransferase	587	522	465	524.667
LGG_RS00785	LGG_00158	ldhD	lactate dehydrogenase	13429	11859	12657	12648.3
LGG_RS00790	LGG_00159	celB	PTS sugar transporter	576	844	404	608
LGG_RS00795	LGG_00160	celA	PTS cellobiose transporter subunit IIA	742	1156	564	820.667
LGG_RS00800	LGG_00161	NO NAME	PTS cellobiose transporter subunit IIC	704	1080	603	795.667
LGG_RS00805	LGG_00162	celC	PTS cellobiose transporter subunit IIC	2727	3933	2136	2932
LGG_RS00810	LGG_00163	bglA	6-phospho-beta-glucosidase	3178	4541	2755	3491.33
LGG_RS00815	LGG_00164	yydk	GntR family transcriptional regulator	422	427	438	429
LGG_RS00820	LGG_00165	NO NAME	hypothetical protein	459	416	385	420
LGG_RS00825	LGG_00166	NO NAME	membrane protein	387	345	390	374
LGG_RS00830	LGG_00167	NO NAME	hypothetical protein	163	168	209	180
LGG_RS00835	LGG_00168	pbuO	guanine permease	6009	5792	6488	6096.33
LGG_RS00840	LGG_00169	NO NAME	sulfur reduction protein DsrE	333	300	312	315
LGG_RS00845	not predicted	NO NAME	hypothetical protein	217	171	193	193.667
LGG_RS00850	LGG_00171	NO NAME	hypothetical protein	440	381	353	391.333
LGG_RS00855	LGG_00172	tauB	taurine ABC transporter ATP-binding protein	133	132	138	134.333
LGG_RS00860	LGG_00173	tauA	sulfonate ABC transporter substrate-binding protein	136	110	149	131.667
LGG_RS00865	LGG_00174	tauC	taurine ABC transporter permease	102	88	83	91
LGG_RS00870	LGG_00175	naoX	pyridine nucleotide-disulfide oxidoreductase	239	203	254	232
LGG_RS00875	LGG_00176	NO NAME	membrane protein	41	28	33	34
LGG_RS00880	LGG_00177	NO NAME	LysR family transcriptional regulator	679	629	619	642.333
LGG_RS00885	LGG_00178	mhqA	glyoxalase	293	242	261	265.333
LGG_RS00890	LGG_00179	NO NAME	hypothetical protein	109	165	125	133
LGG_RS00895	LGG_00180	yoaA	alanine acetyltransferase	401	345	364	370
LGG_RS00900	LGG_00181	NO NAME	hypothetical protein	25	29	27	27
LGG_RS00905	LGG_00182	NO NAME	hypothetical protein	19	6	6	10.3333
LGG_RS00910	LGG_00183	yqcC	cell surface protein	48	41	32	40.3333
LGG_RS00915	LGG_00184	ynjC	cell surface protein	58	60	38	52
LGG_RS00920	LGG_00185	NO NAME	hypothetical protein	79	69	79	75.6667
LGG_RS00925	LGG_00186	NO NAME	hypothetical protein	670	586	579	611.667
LGG_RS00930	LGG_00187	NO NAME	membrane protein	924	901	910	911.667
LGG_RS00935	LGG_00188	NO NAME	hypothetical protein	1728	1586	1435	1583
LGG_RS00940	LGG_00189	ycaJ	ATPase AAA	3885	3444	3059	3462.67
LGG_RS00945	LGG_00190	ackA	acetate kinase	2947	2805	2571	2774.33
LGG_RS00950	LGG_00191	glpR	alkaline phosphatase	240	224	242	235.333
LGG_RS00955	LGG_00192	NO NAME	xylulokinase	80	64	67	70.3333
LGG_RS00960	LGG_00193	fbaA	fructose-bisphosphate aldolase	165	138	132	145
LGG_RS00965	LGG_00194	ulaA	PTS ascorbate transporter subunit IIC	290	271	224	261.667
LGG_RS00970	LGG_00195	pphA	hypothetical protein	1679	1662	1632	1657.67
LGG_RS00975	LGG_00196	NO NAME	endonuclease III	1354	1263	1247	1288
LGG_RS00980	LGG_00197	NO NAME	MFS transporter permease	2981	3043	2993	3005.67
LGG_RS00985	LGG_00200	xfp	phosphoketolase	27850	21787	26590	25409
LGG_RS00990	LGG_00201	oppA	peptide ABC transporter substrate-binding protein	8607	8500	7464	8190.33
LGG_RS00995	LGG_00202	NO NAME	hypothetical protein	41	45	32	39.3333
LGG_RS01000	LGG_00203	NO NAME	hypothetical protein	39	33	38	36.6667
LGG_RS01005	LGG_00204	NO NAME	PTS mannose transporter subunit IID	49	47	42	46
LGG_RS01010	LGG_00205	abc	ABC transporter ATP-binding protein	48	48	41	45.6667
LGG_RS01015	LGG_00206	NO NAME	hypothetical protein	62	66	57	61.6667
LGG_RS01020	LGG_00207	NO NAME	NUDIX hydrolase	461	386	425	424
LGG_RS01025	LGG_00208	NO NAME	hypothetical protein	3324	2878	2989	3063.67
LGG_RS01030	LGG_00209	NO NAME	ABC transporter permease	451	397	402	416.667
LGG_RS01035	LGG_00210	rrg	XRE family transcriptional regulator	378	365	410	384.333
LGG_RS01040	LGG_00211	NO NAME	FAD-dependent oxidoreductase	4471	4618	4463	4517.33
LGG_RS01045	LGG_00212	nox	NADH oxidase	3506	3350	3117	3324.33
LGG_RS01050	LGG_00213	NO NAME	hypothetical protein	2214	2208	2135	2185.67
LGG_RS01055	LGG_00215	NO NAME	hypothetical protein	1523	1838	1543	1634.67
LGG_RS01060	LGG_00216	yxaA	permease	1160	1219	1070	1149.67
LGG_RS01065	LGG_00217	ywjH	membrane protein	458	503	493	484.667
LGG_RS01070	LGG_00218	NO NAME	hypothetical protein	1717	1437	1529	1561
LGG_RS01075	LGG_00219	NO NAME	membrane protein	875	834	845	851.333
LGG_RS01080	LGG_00220	NO NAME	hypothetical protein	124	101	113	112.667
LGG_RS01085	LGG_00221	fldA	flavodoxin	493	405	400	432.667
LGG_RS01090	LGG_00222	NO NAME	hypothetical protein	657	538	605	600
LGG_RS01095	LGG_00223	NO NAME	hypothetical protein	1117	927	969	1004.33
LGG_RS01100	LGG_00225	serA	2-hydroxyacid dehydrogenase	7533	7645	7273	7483.67
LGG_RS01105	LGG_00226	NO NAME	sugar ABC transporter substrate-binding protein	1064	816	1102	994
LGG_RS01110	LGG_00227	ydaS	membrane protein	26	28	36	30
LGG_RS01115	LGG_00228	NO NAME	hypothetical protein	90	68	100	86
LGG_RS01120	LGG_00229	NO NAME	hypothetical protein	38	26	43	35.6667
LGG_RS01125	LGG_00230	asp1	alkaline-shock protein	126	124	121	123.667
LGG_RS01130	LGG_00231	asp2	alkaline-shock protein	296	270	240	268.667
LGG_RS01135	LGG_00232	NO NAME	haloacid dehalogenase	200	208	187	198.333
LGG_RS01140	LGG_00233	NO NAME	membrane protein	6178	6234	5681	6031
LGG_RS01145	LGG_00234	NO NAME	hypothetical protein	4563	4619	4669	4617
LGG_RS01150	not predicted	NO NAME	transposase	0	0	0	0
LGG_RS01155	LGG_00236	is8	transposase	272	287	262	273.667
LGG_RS01160	LGG_00238	pcp	pyrrolidone-carboxylate peptidase	6556	6504	5892	6317.33
LGG_RS01165	LGG_00239	pks	NADP oxidoreductase	1364	1243	1152	1253
LGG_RS01170	pseudo-gene	NO NAME	hypothetical protein	522	453	465	480
LGG_RS01175	LGG_00240	cobQ	cobyric acid synthase	4532	4137	4126	4265
LGG_RS01180	LGG_00241	NO NAME	hypothetical protein	5283	4914	4224	4807
LGG_RS01185	LGG_00242	rsmG	16S rRNA methyltransferase	4319	4052	4509	4293.33
LGG_RS01190	LGG_00243	noc	nucleoid occlusion protein	7448	6994	6499	6980.33
LGG_RS01195	LGG_00244	soj	sporulation initiation inhibitor Soj	7425	7026	6945	7132
LGG_RS01200	LGG_00245	parB	chromosome partitioning protein ParB	11551	11128	11045	11241.3
LGG_RS01205	LGG_00246	NO NAME	hypothetical protein	3253	3061	2894	3069.33
LGG_RS01210	LGG_00247	ychF	GTP-binding protein	15234	14401	14276	14637
LGG_RS01215	LGG_00248	NO NAME	membrane protein	8312	8234	8155	8233.67
LGG_RS01220	LGG_00249	guaB	inosine-5-monophosphate dehydrogenase	11622	10625	10423	10890
LGG_RS01225	LGG_00251	NO NAME	hypothetical protein	172	169	134	158.333
LGG_RS01230	LGG_00252	vanR	two-component system response regulator	5909	5736	5423	5689.33
LGG_RS01235	LGG_00253	vanS	two-component system sensor histidine kinase	11110	10688	10965	10921
LGG_RS01240	LGG_00254	dacA	D-alanyl-D-alanine carboxypeptidase	15083	16062	14648	15264.3
LGG_RS01245	LGG_00256	greA	transcription elongation factor GreA	3761	4000	3606	3789
LGG_RS01250	LGG_00257	murE	UDP-N-acetylmuramoylalanyl-D-glutamate--2%2C 6-diaminopimelate ligase	15196	14784	13354	14444.7
LGG_RS01255	LGG_00258	racD	aspartate racemase	9998	9306	8976	9426.67
LGG_RS01260	LGG_00259	dkgA	2%2C5-diketo-D-gluconic acid reductase	7376	6475	6702	6851
LGG_RS01265	LGG_00260	iolR	alkaline phosphatase	465	440	423	442.667
LGG_RS01270	LGG_00261	iolT	MFS transporter	38	49	42	43
LGG_RS01275	LGG_00262	iolA	methylmalonate-semialdehyde dehydrogenase	70	67	56	64.3333
LGG_RS01280	LGG_00263	iolB	5-deoxy-glucuronate isomerase	74	59	42	58.3333
LGG_RS01285	LGG_00264	iolC	5-dehydro-2-deoxygluconokinase	62	75	64	67
LGG_RS01290	LGG_00265	iolD	3D-(3%2C5/4)-trihydroxycyclohexane-1%2C2-dione hydrolase	171	154	142	155.667
LGG_RS01295	LGG_00266	iolG1	inositol 2-dehydrogenase	100	101	92	97.6667
LGG_RS01300	LGG_00267	iolG2	inositol 2-dehydrogenase	92	98	76	88.6667
LGG_RS01305	LGG_00268	iolE	myo-inosose-2 dehydratase	144	128	128	133.333
LGG_RS01310	LGG_00269	iolJ	fructose-bisphosphate aldolase	109	68	92	89.6667
LGG_RS01315	LGG_00270	iolK	tautomerase	58	54	57	56.3333
LGG_RS01320	LGG_00271	iolI	xylose isomerase	29	27	27	27.6667
LGG_RS01325	LGG_00272	iolH	protein iolH	79	63	79	73.6667
LGG_RS01330	LGG_00273	gntR	RpiR family transcriptional regulator	452	407	499	452.667
LGG_RS01335	LGG_00274	gnd	6-phosphogluconate dehydrogenase	612	571	607	596.667
LGG_RS01340	LGG_00275	gntK	gluconokinase	1485	1533	1425	1481
LGG_RS01345	LGG_00277	gntP	gluconate permease	206	201	207	204.667
LGG_RS01350	LGG_00278	NO NAME	hypothetical protein	2975	2839	2740	2851.33
LGG_RS01355	LGG_00279	welA	dTDP-rhamnosyl transferase	2298	2419	2295	2337.33
LGG_RS01360	LGG_00280	welB	alpha-L-Rha alpha-1%2C3-L-rhamnosyltransferase	1814	1815	1813	1814
LGG_RS01365	LGG_00281	welC	alpha-L-Rha alpha-1%2C3-L-rhamnosyltransferase	3218	3179	3003	3133.33
LGG_RS01370	LGG_00282	eps1	polysaccharide transporter%2C PST family protein	1661	1646	1648	1651.67
LGG_RS01375	LGG_00283	eps2	hypothetical protein	1450	1449	1466	1455
LGG_RS01380	LGG_00284	NO NAME	hypothetical protein	996	873	909	926
LGG_RS01385	LGG_00285	znuC	ABC transporter ATP-binding protein	1956	1874	1762	1864
LGG_RS01390	LGG_00286	znuB	ABC transporter	1132	1087	1216	1145
LGG_RS01395	LGG_00287	NO NAME	phosphoesterase	4698	4899	4434	4677
LGG_RS01400	LGG_00288	mmsB	oxidoreductase	4457	4589	4236	4427.33
LGG_RS01405	LGG_00289	pepF	oligopeptidase PepB	6785	6503	6453	6580.33
LGG_RS01410	LGG_00290	lytR	LytR family transcriptional regulator	2370	2154	2123	2215.67
LGG_RS01415	LGG_00292	brnQ	branched-chain amino acid transporter II carrier protein	263	249	199	237
LGG_RS01420	LGG_00293	NO NAME	hydrolase	33	35	25	31
LGG_RS01425	LGG_00294	glcR	DeoR family transcriptional regulator	1341	1221	1221	1261
LGG_RS01430	LGG_00295	NO NAME	glycosyl transferase family 2	1425	1385	1204	1338
LGG_RS01435	LGG_00296	NO NAME	membrane protein	823	694	595	704
LGG_RS01440	LGG_00297	NO NAME	hypothetical protein	468	412	396	425.333
LGG_RS01445	LGG_00298	spi	signal peptidase	1324	1275	1333	1310.67
LGG_RS01450	LGG_00299	NO NAME	ADP-ribosylglycohydrolase	330	340	387	352.333
LGG_RS01455	LGG_00300	ABC-NBD	multidrug ABC transporter ATP-binding protein	1129	1036	978	1047.67
LGG_RS01460	LGG_00301	NO NAME	methylase	411	351	371	377.667
LGG_RS01465	LGG_03012	16S rRNA	16S ribosomal RNA	0	0	0	0
LGG_RS01470	LGG_03002	23S rRNA	23S ribosomal RNA	0	0	0	0
LGG_RS01475	LGG_03007	5S rRNA	5S ribosomal RNA	0	0	0	0
LGG_RS01480	not predicted	NO NAME	thiol-disulfide isomerase	136	124	119	126.333
LGG_RS01485	LGG_00311	labL	membrane protein	427	390	439	418.667
LGG_RS01490	LGG_00312	NO NAME	membrane protein	198	195	176	189.667
LGG_RS01495	LGG_00313	livJ	branched-chain amino acid ABC transporter substrate-binding protein	174	169	175	172.667
LGG_RS01500	LGG_00314	livH	ABC transporter permease	103	111	107	107
LGG_RS01505	LGG_00315	livM	branched-chain amino acid ABC transporter permease	67	64	77	69.3333
LGG_RS01510	LGG_00316	livG	branched-chain amino acid ABC transporter ATP-binding protein	82	81	71	78
LGG_RS01515	LGG_00317	livF	branched-chain amino acid ABC transporter ATP-binding protein	126	149	116	130.333
LGG_RS01520	LGG_00318	yvdC	hypothetical protein	33	42	49	41.3333
LGG_RS01525	LGG_00319	NO NAME	acyltransferase	1613	1468	1576	1552.33
LGG_RS01530	LGG_00320	pts	PTS cellobiose transporter subunit IIC	1555	1372	1671	1532.67
LGG_RS01535	LGG_00321	deoC	deoxyribose-phosphate aldolase	3197	2926	2793	2972
LGG_RS01540	LGG_00322	deoB	phosphopentomutase	6770	6198	6343	6437
LGG_RS01545	LGG_00323	deoD	purine nucleoside phosphorylase	4810	4390	4232	4477.33
LGG_RS01550	LGG_00324	p75	glycoside hydrolase	50973	43732	48890	47865
LGG_RS01555	LGG_00325	nox	pyridine nucleotide-disulfide oxidoreductase	28229	24839	32316	28461.3
LGG_RS01560	LGG_00326	NO NAME	hypothetical protein	375	354	386	371.667
LGG_RS01565	LGG_00327	NO NAME	hypothetical protein	353	361	311	341.667
LGG_RS01570	LGG_00328	srmB	ATP-dependent helicase	963	868	911	914
LGG_RS01575	LGG_00329	upgB	ABC transporter substrate-binding protein	2518	2404	2346	2422.67
LGG_RS01580	LGG_00330	NO NAME	hypothetical protein	1500	1419	1304	1407.67
LGG_RS01585	LGG_00331	manA	mannose-6-phosphate isomerase	13107	10521	11727	11785
LGG_RS01590	LGG_00332	gntR	GntR family transcriptional regulator	6018	6137	5810	5988.33
LGG_RS01595	LGG_00333	agaS	tagatose-6-phosphate ketose	12305	13091	12563	12653
LGG_RS01600	LGG_00334	nagA	N-acetylglucosamine-6-phosphate deacetylase	12306	12662	12138	12368.7
LGG_RS01605	LGG_00336	bgaC	beta-galactosidase	36610	34113	36653	35792
LGG_RS01610	LGG_00337	manB	PTS mannose transporter subunit IIAB	12724	11825	11596	12048.3
LGG_RS01615	LGG_00338	manC	PTS fructose transporter subunit IIC	10243	9358	9686	9762.33
LGG_RS01620	LGG_00339	manD	PTS fructose transporter subunit IID	10159	9505	10561	10075
LGG_RS01625	LGG_00340	manA	PTS fructose transporter subunit IIA	7219	6703	6536	6819.33
LGG_RS01630	LGG_00341	lacC	tagatose-6-phosphate kinase	5100	4325	4171	4532
LGG_RS01635	LGG_00342	srlD	sorbitol-6-phosphate 2-dehydrogenase	4360	3845	3706	3970.33
LGG_RS01640	LGG_00343	gatC	PTS galactitol transporter subunit IIC	4703	3766	3876	4115
LGG_RS01645	LGG_00344	is9	transposase	1	1	2	1.33333
LGG_RS01650	LGG_00345	gatA	PTS galactitol transporter subunit IIA	2005	1273	1459	1579
LGG_RS01655	LGG_00346	gatB	PTS galactitol transporter subunit IIB	1189	781	906	958.667
LGG_RS01660	LGG_00347	NO NAME	hypothetical protein	732	647	672	683.667
LGG_RS01665	LGG_00348	yohJ	glycosyl transferase family 1	2574	2406	2285	2421.67
LGG_RS01670	LGG_00349	yohH	glycosyl transferase family 1	2953	2832	2663	2816
LGG_RS01675	LGG_00350	NO NAME	hypothetical protein	3815	3624	3390	3609.67
LGG_RS01680	LGG_00351	patB	aminotransferase	110	105	97	104
LGG_RS01685	LGG_00352	ypdF	aminopeptidase	52	59	53	54.6667
LGG_RS01690	LGG_00353	pts	PTS lactose transporter subunit IIC	43	31	35	36.3333
LGG_RS01695	LGG_00354	celA	PTS lactose transporter subunit IIB	5	6	6	5.66667
LGG_RS01700	LGG_00355	chbA	PTS lactose transporter subunit IIA	9	7	5	7
LGG_RS01705	LGG_00356	ypdE	aminopeptidase	13	14	11	12.6667
LGG_RS01710	LGG_00357	NO NAME	transcriptional antiterminator	16	15	24	18.3333
LGG_RS01715	LGG_00358	pepT	peptidase M20	1250	1107	1217	1191.33
LGG_RS01720	LGG_00359	oppA	peptide ABC transporter substrate-binding protein	1991	1936	1856	1927.67
LGG_RS01725	LGG_00360	yhbS	N-acetyltransferase GCN5	1154	1010	1060	1074.67
LGG_RS01730	LGG_00361	NO NAME	hypothetical protein	765	568	689	674
LGG_RS01735	LGG_00362	nisT	ABC transporter ATP-binding protein	206	195	194	198.333
LGG_RS01740	LGG_00363	NO NAME	cobalt ABC transporter permease	4	7	6	5.66667
LGG_RS01745	LGG_00364	cbiO	cobalt ABC transporter ATP-binding protein	8	8	5	7
LGG_RS01750	LGG_00365	cbiQ	cobalt ABC transporter permease	4	6	4	4.66667
LGG_RS01755	LGG_00366	tenA	thiaminase II	6	5	5	5.33333
LGG_RS01760	LGG_00367	thiW	hydroxyethylthiazole permease	2	4	1	2.33333
LGG_RS01765	LGG_00368	thiM	hydroxyethylthiazole kinase	11	17	13	13.6667
LGG_RS01770	LGG_00369	thiE	thiamine-phosphate pyrophosphorylase	16	14	11	13.6667
LGG_RS01775	LGG_00370	thiD	phosphomethylpyrimidine kinase	123	121	102	115.333
LGG_RS01780	LGG_00371	ycaM	amino acid permease	287	354	308	316.333
LGG_RS01785	LGG_00372	rbsR	LacI family transcriptional regulator	216	166	161	181
LGG_RS01790	LGG_00373	rbsK	ribokinase	281	242	214	245.667
LGG_RS01795	LGG_00374	NO NAME	XRE family transcriptional regulator	63	64	47	58
LGG_RS01800	not predicted	NO NAME	hypothetical protein	101	101	76	92.6667
LGG_RS01805	LGG_00376	is10	transposase	9	14	11	11.3333
LGG_RS01810	not predicted	NO NAME	hypothetical protein	737	675	691	701
LGG_RS01815	LGG_00377	NO NAME	hypothetical protein	981	1014	739	911.333
LGG_RS01820	LGG_00379	NO NAME	hypothetical protein	22	10	14	15.3333
LGG_RS01825	LGG_00380	NO NAME	membrane protein	40	37	35	37.3333
LGG_RS01830	LGG_00381	NO NAME	hypothetical protein	33	29	28	30
LGG_RS01835	LGG_00382	pbp	penicillin-binding protein	2074	2551	2148	2257.67
LGG_RS01840	LGG_00383	is11	transposase	0	0	0	0
LGG_RS01845	not predicted	NO NAME	hypothetical protein	79	83	75	79
LGG_RS01850	LGG_00385	NO NAME	hypothetical protein	20	18	14	17.3333
LGG_RS01855	LGG_00386	NO NAME	MFS transporter permease	344	415	349	369.333
LGG_RS01860	LGG_00387	slyA	MarR family transcriptional regulator	154	154	153	153.667
LGG_RS01865	LGG_00388	NO NAME	hypothetical protein	272	234	203	236.333
LGG_RS01870	LGG_00389	NO NAME	hypothetical protein	95	90	93	92.6667
LGG_RS01875	LGG_00390	aroE	DNA-binding protein	113	79	81	91
LGG_RS01880	LGG_00391	NO NAME	hypothetical protein	22	9	14	15
LGG_RS01885	LGG_00392	NO NAME	hypothetical protein	28	41	31	33.3333
LGG_RS01890	LGG_00393	manR	transcription antiterminator	59	59	55	57.6667
LGG_RS01895	LGG_00394	NO NAME	PTS sugar transporter subunit IIABC	9	6	6	7
LGG_RS01900	LGG_00395	frwA1	PTS fructose transporter subunit IIA	30	31	27	29.3333
LGG_RS01905	LGG_00396	frwB1	PTS fructose transporter subunit IIB	24	27	19	23.3333
LGG_RS01910	LGG_00397	frwC1	PTS fructose transporter subunit IIC	84	96	70	83.3333
LGG_RS01915	LGG_00398	tal	fructose-6-phosphate aldolase	99	77	65	80.3333
LGG_RS01920	LGG_00399	rpe	allulose-6-phosphate 3-epimerase	61	63	62	62
LGG_RS01925	LGG_00400	ulaA	PTS lactose transporter subunit IIA	53	41	37	43.6667
LGG_RS01930	LGG_00401	ulaB	PTS lactose transporter subunit IIB	46	35	31	37.3333
LGG_RS01935	LGG_00402	pts	PTS trehalose transporter subunit IIBC	40	31	40	37
LGG_RS01940	LGG_00403	is12	transposase	0	0	0	0
LGG_RS01945	LGG_00404	ulaC	PTS ascorbate transporter subunit IIC	102	95	81	92.6667
LGG_RS01950	LGG_00405	tktN	transketolase	114	97	87	99.3333
LGG_RS01955	LGG_00406	tktC	transketolase	85	72	93	83.3333
LGG_RS01960	LGG_00407	scrK	fructokinase	695	487	501	561
LGG_RS01965	LGG_00408	lacR	Lactose phosphotransferase system repressor	354	296	283	311
LGG_RS01970	LGG_00409	frwA2	PTS fructose transporter subunit IIA	18	26	8	17.3333
LGG_RS01975	LGG_00410	frwB2	PTS fructose transporter subunit IIB	23	18	7	16
LGG_RS01980	LGG_00411	frwC2	PTS fructose IIC component	91	72	71	78
LGG_RS01985	LGG_00412	is13	transposase	0	0	0	0
LGG_RS01990	LGG_00413	fba	fructose-bisphosphate aldolase	74	61	73	69.3333
LGG_RS01995	LGG_00414	gatY	hypothetical protein	566	507	538	537
LGG_RS02000	LGG_00415	pts	PTS mannose transporter subunit IIB	1047	1275	847	1056.33
LGG_RS02005	LGG_00416	pts	PTS mannose transporter subunit IIB	798	1003	585	795.333
LGG_RS02010	LGG_00417	manZ	PTS mannose transporter subunit IICD	2244	2956	2289	2496.33
LGG_RS02015	LGG_00418	tal	transaldolase	1321	1515	1345	1393.67
LGG_RS02020	LGG_00419	NO NAME	LacI family transcriptional regulator	212	208	166	195.333
LGG_RS02025	LGG_00420	yhfZ	GntR family transcriptional regulator	690	503	528	573.667
LGG_RS02030	LGG_00421	NO NAME	hypothetical protein	258	179	187	208
LGG_RS02035	LGG_00422	NO NAME	hypothetical protein	205	150	174	176.333
LGG_RS02040	LGG_00423	NO NAME	membrane protein	136	149	106	130.333
LGG_RS02045	LGG_00424	php	hydrolase	120	156	135	137
LGG_RS02050	LGG_00425	yhfS	hypothetical protein	107	139	120	122
LGG_RS02055	LGG_00426	yhfX	amino acid racemase	135	161	115	137
LGG_RS02060	LGG_00427	YHFW	mutase	272	223	226	240.333
LGG_RS02065	LGG_00428	ilvH	DNA-directed RNA polymerase subunit delta	2159	2347	2027	2177.67
LGG_RS02070	LGG_00429	NO NAME	membrane protein	1454	1586	1538	1526
LGG_RS02075	LGG_00430	cbiO	heme ABC transporter ATP-binding protein	4603	5314	4688	4868.33
LGG_RS02080	LGG_00431	cbiQ	cobalt ABC transporter permease	2037	2310	1897	2081.33
LGG_RS02085	not predicted	NO NAME	hypothetical protein	69	84	81	78
LGG_RS02090	LGG_00433	menC	O-succinylbenzoate synthase	52	56	44	50.6667
LGG_RS02095	LGG_00434	nagZ	beta-N-acetylglucosaminidase	1158	830	795	927.667
LGG_RS02100	not predicted	NO NAME	transposase	60	54	46	53.3333
LGG_RS02105	LGG_00436	tnpR	resolvase	726	614	636	658.667
LGG_RS02110	LGG_00437	NO NAME	hypothetical protein	493	396	422	437
LGG_RS02115	pseudo-gene	NO NAME	alcohol dehydrogenase	477	360	422	419.667
LGG_RS02120	not predicted	NO NAME	hypothetical protein	229	170	220	206.333
LGG_RS02125	LGG_00441	srtC1	sortase	1253	1377	1141	1257
LGG_RS02130	LGG_00442	spaA	pilus protein	8073	9643	7365	8360.33
LGG_RS02135	LGG_00443	spaB	pilus protein	4375	4998	3702	4358.33
LGG_RS02140	LGG_00444	spaC	pilus protein	24921	26779	21387	24362.3
LGG_RS02145	LGG_00445	is15	transposase	0	0	0	0
LGG_RS02150	LGG_00446	NO NAME	hypothetical protein	67	47	69	61
LGG_RS02155	pseudo-gene	NO NAME	hypothetical protein	253	232	222	235.667
LGG_RS02160	LGG_00449	NO NAME	helicase UvrD	430	401	373	401.333
LGG_RS02165	LGG_00450	ybjD	hypothetical protein	225	202	191	206
LGG_RS02170	LGG_00451	is16	transposase	0	1	1	0.666667
LGG_RS02175	LGG_00452	is17	transposase	12	17	20	16.3333
LGG_RS02180	LGG_00453	is18	transposase	74	65	73	70.6667
LGG_RS02185	LGG_00454	is19	integrase	90	69	96	85
LGG_RS02190	LGG_00455	NO NAME	hypothetical protein	838	825	905	856
LGG_RS02195	LGG_00456	pacL	magnesium-transporting ATPase	2803	2873	3003	2893
LGG_RS02200	LGG_00458	is21	transposase	21	22	11	18
LGG_RS02205	LGG_00459	napA	sodium:proton antiporter	218	229	224	223.667
LGG_RS02210	LGG_00460	is22	transposase	3	2	10	5
LGG_RS02215	LGG_00462	is24	transposase	80	76	70	75.3333
LGG_RS02220	LGG_00463	eriC	ATP synthase F0 subunit A	115	131	122	122.667
LGG_RS02225	not predicted	NO NAME	transposase	60	68	55	61
LGG_RS02230	LGG_00465	NO NAME	transporter	88	71	71	76.6667
LGG_RS02235	LGG_00466	is26	transposase	0	0	0	0
LGG_RS02240	LGG_00467	NO NAME	peptidase M20	148	135	116	133
LGG_RS02245	pseudo-gene	NO NAME	LysR family transcriptional regulator	103	98	96	99
LGG_RS02250	LGG_00470	ebgA	beta-galactosidase	957	853	751	853.667
LGG_RS02255	LGG_00471	ygjI	amino acid permease	287	316	247	283.333
LGG_RS02260	LGG_00472	lysP	gamma-aminobutyrate permease	157	153	154	154.667
LGG_RS02265	LGG_00473	araC	AraC family transcriptional regulator	341	220	245	268.667
LGG_RS02270	LGG_00474	NO NAME	transcriptional regulator	378	285	274	312.333
LGG_RS02275	LGG_00475	NO NAME	transporter	62	51	43	52
LGG_RS02280	LGG_00476	abgB	peptidase M20	122	116	99	112.333
LGG_RS02285	LGG_00477	NO NAME	membrane protein	259	242	218	239.667
LGG_RS02290	LGG_00478	yecC	phosphate ABC transporter ATP-binding protein	132	146	129	135.667
LGG_RS02295	LGG_00479	NO NAME	amino acid ABC transporter substrate-binding protein	186	175	136	165.667
LGG_RS02300	LGG_00480	NO NAME	amino acid ABC transporter permease	76	74	91	80.3333
LGG_RS02305	LGG_00481	NO NAME	amino acid ABC transporter permease	92	105	90	95.6667
LGG_RS02310	LGG_00482	NO NAME	hypothetical protein	21	23	16	20
LGG_RS02315	LGG_00484	NO NAME	DNA-directed RNA polymerase subunit sigma-24	5	3	6	4.66667
LGG_RS02320	LGG_00486	NO NAME	lyzozyme M1 (1%2C4-beta-N-acetylmuramidase)	35	29	25	29.6667
LGG_RS02325	LGG_00487	NO NAME	hypothetical protein	458	359	440	419
LGG_RS02330	LGG_00488	NO NAME	TetR family transcriptional regulator	100	105	98	101
LGG_RS02335	LGG_00489	NO NAME	ABC transporter permease	376	334	380	363.333
LGG_RS02340	LGG_00490	lolD	peptide ABC transporter ATP-binding protein	287	272	299	286
LGG_RS02345	LGG_00491	npr	NAD(FAD)-dependent dehydrogenase	25438	20683	25627	23916
LGG_RS02350	LGG_00492	NO NAME	haloacid dehalogenase	504	444	526	491.333
LGG_RS02355	LGG_00493	NO NAME	toxin	75	60	65	66.6667
LGG_RS02360	LGG_00494	NO NAME	adenylyl transferase	259	256	276	263.667
LGG_RS02365	LGG_00495	NO NAME	hypothetical protein	19	12	27	19.3333
LGG_RS02370	LGG_00496	NO NAME	hypothetical protein	10	9	12	10.3333
LGG_RS02375	LGG_00497	NO NAME	hypothetical protein	29	22	24	25
LGG_RS02380	LGG_00499	is27	transposase	1	0	1	0.666667
LGG_RS02385	not predicted	NO NAME	hypothetical protein	16	22	25	21
LGG_RS02390	LGG_00500	metQ	metal ABC transporter substrate-binding protein	11	9	13	11
LGG_RS02395	LGG_00501	NO NAME	choloylglycine hydrolase	4253	3797	3615	3888.33
LGG_RS02400	LGG_00502	NO NAME	hypothetical protein	354	301	314	323
LGG_RS02405	LGG_00503	NO NAME	isomerase	4598	4249	4076	4307.67
LGG_RS02410	LGG_00505	NO NAME	transcriptional regulator	6756	6375	6395	6508.67
LGG_RS02415	LGG_00506	NO NAME	dihydroxyacetone kinase	7820	7379	7487	7562
LGG_RS02420	LGG_00508	dhaL	dihydroxyacetone kinase	11130	10753	10764	10882.3
LGG_RS02425	LGG_00509	dhaK	dihydroxyacetone kinase subunit DhaK	15266	14172	13741	14393
LGG_RS02430	LGG_00510	NO NAME	dihydroneopterin aldolase	2112	1426	1630	1722.67
LGG_RS02435	LGG_00511	NO NAME	ABC transporter ATP-binding protein	134	122	111	122.333
LGG_RS02440	LGG_00512	NO NAME	ABC transporter	64	59	45	56
LGG_RS02445	LGG_00513	is28	transposase	4	9	6	6.33333
LGG_RS02450	LGG_00514	NO NAME	hypothetical protein	85	65	77	75.6667
LGG_RS02455	LGG_00516	NO NAME	hypothetical protein	98	85	76	86.3333
LGG_RS02460	LGG_00517	is29	transposase	4	3	5	4
LGG_RS02465	not predicted	NO NAME	hypothetical protein	115	112	77	101.333
LGG_RS02470	LGG_00518	NO NAME	DNA polymerase III subunit alpha	954	923	947	941.333
LGG_RS02475	LGG_00519	NO NAME	DNA-damage-inducible protein J	83	69	63	71.6667
LGG_RS02480	LGG_00520	yceK	ArsR family transcriptional regulator	920	892	824	878.667
LGG_RS02485	LGG_00521	yceJ	MFS transporter permease	28	27	46	33.6667
LGG_RS02490	LGG_00522	tag	3-methyladenine DNA glycosylase	393	331	352	358.667
LGG_RS02495	LGG_00523	NO NAME	hypothetical protein	274	261	288	274.333
LGG_RS02500	LGG_00524	fba	fructose-bisphosphate aldolase	9747	9553	10603	9967.67
LGG_RS02505	LGG_00525	cidC	pyruvate oxidase	30309	28246	29585	29380
LGG_RS02510	LGG_00526	NO NAME	hypothetical protein	310	291	271	290.667
LGG_RS02515	pseudo-gene	NO NAME	beta-lactamase	802	728	754	761.333
LGG_RS02520	LGG_00529	NO NAME	hypothetical protein	68	74	60	67.3333
LGG_RS02525	LGG_00530	ykfB	L-alanine-DL-glutamate epimerase	246	244	273	254.333
LGG_RS02530	LGG_00532	NO NAME	SAM-dependent methyltransferase	374	382	373	376.333
LGG_RS02535	LGG_00533	radC	hypothetical protein	165	163	147	158.333
LGG_RS02540	LGG_00534	trpD	glutamine amidotransferase	415	430	381	408.667
LGG_RS02545	LGG_00535	NO NAME	hypothetical protein	103	108	96	102.333
LGG_RS02550	LGG_00536	glnA	glutamine synthetase	2268	2156	2340	2254.67
LGG_RS02555	LGG_00538	NO NAME	hydrolase	4073	3954	3961	3996
LGG_RS02560	LGG_00539	NO NAME	amino acid transporter	2938	2801	3090	2943
LGG_RS02565	LGG_00540	merR	MerR family transcriptional regulator	349	356	294	333
LGG_RS02570	LGG_00541	ycgG	2%2C5-diketo-D-gluconic acid reductase	1754	1640	1596	1663.33
LGG_RS02575	LGG_00542	gor	NADPH:quinone reductase	1082	910	937	976.333
LGG_RS02580	LGG_00543	ydeP	HxlR family transcriptional regulator	1970	2256	1796	2007.33
LGG_RS02585	LGG_00544	NO NAME	membrane protein	125	108	139	124
LGG_RS02590	LGG_00545	NO NAME	ABC transporter permease	163	161	204	176
LGG_RS02595	LGG_00546	natA	ABC transporter ATP-binding protein	196	169	194	186.333
LGG_RS02600	LGG_00547	NO NAME	ABC transporter ATP-binding protein	376	368	402	382
LGG_RS02605	LGG_00548	resD	two-component system response regulator	248	241	206	231.667
LGG_RS02610	LGG_00549	resE	signal transduction histidine kinase	1523	1537	1319	1459.67
LGG_RS02615	LGG_00550	mppX	ABC transporter ATP-binding protein	331	303	298	310.667
LGG_RS02620	LGG_00551	NO NAME	ABC transporter permease	228	212	188	209.333
LGG_RS02625	LGG_00552	NO NAME	hypothetical protein	83	67	60	70
LGG_RS02630	LGG_00554	pepN	aminopeptidase N	26689	25353	25111	25717.7
LGG_RS02635	LGG_00555	ycaM	transporter	300	349	280	309.667
LGG_RS02640	LGG_00557	xylP	sodium:solute symporter	3932	3549	3601	3694
LGG_RS02645	LGG_00558	NO NAME	membrane protein	2525	2244	2190	2319.67
LGG_RS02650	LGG_00559	NO NAME	LysR family transcriptional regulator	299	257	247	267.667
LGG_RS02655	LGG_00561	NO NAME	isomerase	65	51	45	53.6667
LGG_RS02660	LGG_00562	kduD	2-deoxy-D-gluconate 3-dehydrogenase	57	46	40	47.6667
LGG_RS02665	LGG_00563	NO NAME	hypothetical protein	4	3	2	3
LGG_RS02670	LGG_00564	aroE	shikimate 5-dehydrogenase	25	27	22	24.6667
LGG_RS02675	LGG_00565	yfkL	MFS transporter	60	69	57	62
LGG_RS02680	LGG_00566	aroE	shikimate 5-dehydrogenase	45	53	44	47.3333
LGG_RS02685	LGG_00567	metA	homoserine O-succinyltransferase	1869	1644	1512	1675
LGG_RS02690	LGG_00568	cysK	cysteine synthase	1152	1011	922	1028.33
LGG_RS02695	LGG_02945	tRNA-Arg	tRNA-Arg	21	16	19	18.6667
LGG_RS02700	LGG_00569	NO NAME	hypothetical protein	374	280	366	340
LGG_RS02705	LGG_00570	NO NAME	hypothetical protein	131	129	139	133
LGG_RS02710	LGG_00571	metC	cystathionine beta-lyase	823	951	760	844.667
LGG_RS02715	LGG_00572	fliY	amino acid ABC transporter substrate-binding protein	812	914	802	842.667
LGG_RS02720	LGG_00573	yecS	cysteine ABC transporter permease	581	617	531	576.333
LGG_RS02725	LGG_00574	NO NAME	hypothetical protein	3865	3822	3070	3585.67
LGG_RS02730	LGG_00575	brnQ	branched-chain amino acid transporter II carrier protein	786	727	823	778.667
LGG_RS02735	LGG_00576	NO NAME	hypothetical protein	30	34	23	29
LGG_RS02740	LGG_00577	NO NAME	cell surface protein	38	42	49	43
LGG_RS02745	LGG_00578	NO NAME	peptidase	13	16	15	14.6667
LGG_RS02750	LGG_00579	NO NAME	hypothetical protein	309	248	234	263.667
LGG_RS02755	not predicted	NO NAME	transposase	0	0	0	0
LGG_RS02760	LGG_00582	is31	transposase	238	174	157	189.667
LGG_RS02765	LGG_00583	NO NAME	hypothetical protein	1393	1079	1099	1190.33
LGG_RS02770	LGG_00584	NO NAME	cell surface protein	672	610	497	593
LGG_RS02775	LGG_00585	NO NAME	cell surface protein	1035	973	896	968
LGG_RS02780	LGG_00587	NO NAME	hypothetical protein	1997	1862	1653	1837.33
LGG_RS02785	LGG_00588	yicL	peptide ABC transporter ATP-binding protein	358	317	351	342
LGG_RS02790	LGG_00589	NO NAME	hypothetical protein	0	0	0	0
LGG_RS02795	LGG_00590	NO NAME	ABC transporter permease	588	591	584	587.667
LGG_RS02800	LGG_00591	CcmA5	ABC transporter	360	360	317	345.667
LGG_RS02805	LGG_00592	NO NAME	hypothetical protein	92	83	81	85.3333
LGG_RS02810	LGG_00593	is32	transposase	0	0	0	0
LGG_RS02815	LGG_00595	pdxK	pyridoxal kinase	895	923	881	899.667
LGG_RS02820	LGG_00596	metF	5%2C10-methylenetetrahydrofolate reductase	833	786	816	811.667
LGG_RS02825	LGG_00597	metE	5-methyltetrahydropteroyltriglutamate--homocysteine methyltransferase	1759	1798	1900	1819
LGG_RS02830	LGG_00598	lmrC	ABC transporter ATP-binding protein	996	1083	988	1022.33
LGG_RS02835	LGG_00599	lmrD	multidrug ABC transporter permease	1548	1489	1416	1484.33
LGG_RS02840	LGG_00600	oxlT	MFS transporter	9027	6936	8857	8273.33
LGG_RS02845	LGG_00601	treR	transcriptional regulator	414	428	356	399.333
LGG_RS02850	LGG_00602	treC	alpha-amylase	949	1050	752	917
LGG_RS02855	LGG_00603	treB	PTS beta-glucoside transporter subunit IIABC	1148	1214	1005	1122.33
LGG_RS02860	LGG_00604	sstT	serine/threonine transporter SstT	364	310	340	338
LGG_RS02865	LGG_00605	bcaP	amino acid permease	539	557	549	548.333
LGG_RS02870	LGG_00606	ldh	L-lactate dehydrogenase	1826	1381	1495	1567.33
LGG_RS02875	LGG_00607	gdhA	glutamate dehydrogenase	251	222	203	225.333
LGG_RS02880	LGG_00608	cspA	cold-shock protein	13758	11715	13078	12850.3
LGG_RS02885	LGG_00610	NO NAME	hypothetical protein	296	262	309	289
LGG_RS02890	LGG_00611	NO NAME	dihydroneopterin aldolase	609	512	538	553
LGG_RS02895	LGG_00612	lsa	ABC-F type ribosomal protection protein	329	318	309	318.667
LGG_RS02900	LGG_00614	ylbE	nucleoside-diphosphate sugar epimerase	6254	6010	5596	5953.33
LGG_RS02905	LGG_00615	yeaE	aldehyde oxidoreductase	7012	6665	6499	6725.33
LGG_RS02910	LGG_00616	proY	alanine glycine permease	2221	1972	2003	2065.33
LGG_RS02915	LGG_00617	NO NAME	hypothetical protein	17903	17787	16170	17286.7
LGG_RS02920	LGG_00618	NO NAME	sodium:proton antiporter	2892	2503	2924	2773
LGG_RS02925	LGG_00619	NO NAME	hypothetical protein	375	373	330	359.333
LGG_RS02930	LGG_00620	NO NAME	transcriptional regulator	341	304	317	320.667
LGG_RS02935	LGG_00621	cylB	multidrug ABC transporter permease	40	51	59	50
LGG_RS02940	LGG_00622	cylA	ABC transporter ATP-binding protein	42	42	41	41.6667
LGG_RS02945	LGG_00623	NO NAME	alpha/beta hydrolase	1250	1325	1159	1244.67
LGG_RS02950	LGG_00624	cah	carbonic anhydrase	1147	1283	1106	1178.67
LGG_RS02955	LGG_00625	ybjQ	hypothetical protein	1008	1124	1110	1080.67
LGG_RS02960	LGG_00627	NO NAME	NUDIX hydrolase	121	106	122	116.333
LGG_RS02965	LGG_00628	walR	two-component system response regulator	151	141	116	136
LGG_RS02970	LGG_00629	walK	two-component system sensor histidine kinase	236	169	153	186
LGG_RS02975	LGG_00630	ycbN	bacitracin ABC transporter ATP-binding protein	1074	829	768	890.333
LGG_RS02980	LGG_00631	NO NAME	bacitracin ABC transporter permease	608	514	475	532.333
LGG_RS02985	LGG_00632	gor	NADPH:quinone reductase	517	488	508	504.333
LGG_RS02990	LGG_00633	amtB	ammonia permease	163	183	144	163.333
LGG_RS02995	LGG_00634	NO NAME	peroxidase	1161	997	997	1051.67
LGG_RS03000	LGG_00635	yhiD	methyltransferase	560	463	493	505.333
LGG_RS03005	LGG_00636	endA	XRE family transcriptional regulator	668	612	667	649
LGG_RS03010	LGG_00638	ybiT	heme ABC transporter ATP-binding protein	1809	1738	1705	1750.67
LGG_RS03015	pseudo-gene	NO NAME	DNA mismatch repair protein MutS	2199	1979	1939	2039
LGG_RS03020	LGG_00641	ysiD	uracil-DNA glycosylase	742	631	670	681
LGG_RS03025	LGG_00642	glpF	glycerol transporter	255	249	245	249.667
LGG_RS03030	LGG_00643	glpD	alpha-glycerophosphate oxidase	526	548	486	520
LGG_RS03035	LGG_00644	glpK	glycerol kinase	352	314	336	334
LGG_RS03040	LGG_00645	NO NAME	glycosyl transferase family 2	44	32	42	39.3333
LGG_RS03045	LGG_00646	NO NAME	hypothetical protein	122	106	89	105.667
LGG_RS03050	LGG_00647	NO NAME	hypothetical protein	18	6	18	14
LGG_RS03055	LGG_00648	lacT	transcription antiterminator lact	91	74	83	82.6667
LGG_RS03060	LGG_00649	lacE	PTS lactose transporter subunit IIB	166	160	153	159.667
LGG_RS03065	pseudo-gene	NO NAME	6-phospho-beta-galactosidase	212	202	176	196.667
LGG_RS03070	LGG_00652	lacF	PTS lactose transporter subunit IIA	67	64	50	60.3333
LGG_RS03075	LGG_00653	galK	galactokinase	814	658	572	681.333
LGG_RS03080	LGG_00654	galE	UDP-glucose 4-epimerase	9470	8572	8276	8772.67
LGG_RS03085	LGG_00655	galT	peptidase S24	12518	11657	10929	11701.3
LGG_RS03090	LGG_00656	galR	transcriptional regulator	7498	7105	7020	7207.67
LGG_RS03095	LGG_00657	galM	aldose 1-epimerase	9419	9088	7833	8780
LGG_RS03100	LGG_00658	NO NAME	hypothetical protein	49	46	38	44.3333
LGG_RS03105	LGG_00659	pts	PTS glucitol transporter subunit IIA	135	108	95	112.667
LGG_RS03110	LGG_00660	NO NAME	hypothetical protein	31	26	33	30
LGG_RS03115	LGG_00661	NO NAME	hypothetical protein	669	593	498	586.667
LGG_RS03120	LGG_00662	NO NAME	serine hydrolase	1105	1160	1047	1104
LGG_RS03125	LGG_00663	NO NAME	hypothetical protein	760	768	736	754.667
LGG_RS03130	LGG_00664	lacC	tagatose-6-phosphate kinase	1169	1187	1082	1146
LGG_RS03135	LGG_00665	lacD	tagatose-bisphosphate aldolase	2149	2161	2310	2206.67
LGG_RS03140	LGG_00666	lacB	galactose-6-phosphate isomerase	1564	1478	1394	1478.67
LGG_RS03145	LGG_00667	lacA	galactose-6-phosphate isomerase	1163	1211	1169	1181
LGG_RS03150	LGG_00668	lacR	DeoR family transcriptional regulator	2154	2193	1889	2078.67
LGG_RS03155	LGG_00669	NO NAME	phosphatase	1550	1380	1414	1448
LGG_RS03160	LGG_00670	sbcD	exonuclease SbcD subunit D	713	707	703	707.667
LGG_RS03165	LGG_00671	sbcC	DNA repair ATPase	3214	3209	2989	3137.33
LGG_RS03170	LGG_00675	hsp1	molecular chaperone	5778	4518	5908	5401.33
LGG_RS03175	LGG_00676	mutY	A/G-specific adenine glycosylase	1136	1048	1203	1129
LGG_RS03180	LGG_00677	NO NAME	esterase	1731	1607	1594	1644
LGG_RS03185	LGG_00678	ywrO	NAD(P)H dehydrogenase	855	802	929	862
LGG_RS03190	LGG_00679	NO NAME	hypothetical protein	471	426	365	420.667
LGG_RS03195	LGG_00680	NO NAME	hypothetical protein	1174	1038	1126	1112.67
LGG_RS03200	LGG_00681	thiD	phosphomethylpyrimidine kinase	9841	9355	9770	9655.33
LGG_RS03205	LGG_00682	NO NAME	hypothetical protein	12781	11869	12542	12397.3
LGG_RS03210	LGG_00683	NO NAME	hypothetical protein	6616	6063	6200	6293
LGG_RS03215	LGG_00684	ywnB	NADH-flavin reductase	709	652	766	709
LGG_RS03220	LGG_00685	bglX	beta-glucosidase	4804	4341	4390	4511.67
LGG_RS03225	LGG_00686	NO NAME	hypothetical protein	252	205	270	242.333
LGG_RS03230	LGG_00687	ABC-SBP	ABC transporter substrate-binding protein	61	55	56	57.3333
LGG_RS03235	LGG_00689	ABC-SBP	ABC transporter substrate-binding protein	447	605	505	519
LGG_RS03240	LGG_00690	ABC-MSP	ABC transporter permease	369	416	372	385.667
LGG_RS03245	LGG_00691	thiQ	ABC transporter ATP-binding protein	385	461	402	416
LGG_RS03250	LGG_00692	yhdH	NADPH:quinone reductase	827	829	812	822.667
LGG_RS03255	LGG_00693	pacL	metal ABC transporter ATPase	128	120	113	120.333
LGG_RS03260	LGG_00695	gtrB	glycosyltransferase	84	96	89	89.6667
LGG_RS03265	LGG_00696	ykcB	4-amino-4-deoxy-L-arabinose transferase	169	178	134	160.333
LGG_RS03270	LGG_00697	NO NAME	membrane protein	22	31	24	25.6667
LGG_RS03275	LGG_00700	phoP1	two-component system response regulator	746	677	602	675
LGG_RS03280	LGG_00701	phoR1	two-component system sensor histidine kinase	1011	939	927	959
LGG_RS03285	LGG_00702	NO NAME	hypothetical protein	880	690	703	757.667
LGG_RS03290	LGG_00703	NO NAME	polyketide synthase	493	336	362	397
LGG_RS03295	LGG_00704	NO NAME	short-chain dehydrogenase	52	39	36	42.3333
LGG_RS03300	LGG_00705	adc	acetoacetate decarboxylase	61	61	63	61.6667
LGG_RS03305	LGG_00706	ydgI	NAD(P)H-dependent quinone reductase	2043	1695	1516	1751.33
LGG_RS03310	LGG_00707	lctO	L-lactate oxidase	2970	2429	2465	2621.33
LGG_RS03315	LGG_03001	tRNA-Ala	tRNA-Ala	18	10	26	18
LGG_RS03320	LGG_03000	tRNA-Ala	tRNA-Ala	12	19	18	16.3333
LGG_RS03325	LGG_00708	NO NAME	hypothetical protein	296	318	266	293.333
LGG_RS03330	LGG_00709	ydaF	PadR family transcriptional regulator	161	168	117	148.667
LGG_RS03335	LGG_00710	ygbF	membrane protein	988	927	882	932.333
LGG_RS03340	LGG_00711	NO NAME	hypothetical protein	635	594	596	608.333
LGG_RS03345	LGG_00712	gor	NADPH:quinone reductase	1833	1699	1767	1766.33
LGG_RS03350	LGG_00713	NO NAME	hypothetical protein	397	399	380	392
LGG_RS03355	LGG_00714	NO NAME	hypothetical protein	616	693	687	665.333
LGG_RS03360	LGG_00715	yubA	membrane protein	1554	1632	1611	1599
LGG_RS03365	LGG_00716	NO NAME	hypothetical protein	165	134	143	147.333
LGG_RS03370	LGG_00717	lexA	LexA family transcriptional regulator	1291	1129	1223	1214.33
LGG_RS03375	LGG_00718	NO NAME	hypothetical protein	1371	1504	1231	1368.67
LGG_RS03380	LGG_00719	mleP	malate transporter	2203	2178	2106	2162.33
LGG_RS03385	LGG_00720	ywrF	hypothetical protein	1825	1930	1758	1837.67
LGG_RS03390	LGG_00721	NO NAME	hypothetical protein	5561	5288	5002	5283.67
LGG_RS03395	LGG_00722	fthC	5-formyltetrahydrofolate cyclo-ligase	4467	4029	4173	4223
LGG_RS03400	LGG_00723	yeaO	hypothetical protein	2826	2354	2179	2453
LGG_RS03405	LGG_00724	NO NAME	Mg2+ and Co2+ transporter protein	1372	1285	1323	1326.67
LGG_RS03410	LGG_00725	mleR	LysR family transcriptional regulator	1372	1318	1384	1358
LGG_RS03415	LGG_00726	sfcA	malate dehydrogenase	250	302	312	288
LGG_RS03420	LGG_00727	mleP	malate permease	239	232	244	238.333
LGG_RS03425	LGG_00728	tpx	thiol peroxidase	3862	3414	3447	3574.33
LGG_RS03430	LGG_00729	NO NAME	flavodoxin	80	77	82	79.6667
LGG_RS03435	LGG_00730	NO NAME	transcriptional regulator	199	176	221	198.667
LGG_RS03440	LGG_00731	NO NAME	multidrug ABC transporter ATP-binding protein	326	347	335	336
LGG_RS03445	LGG_00732	pepF	oligoendopeptidase F	2172	2213	2097	2160.67
LGG_RS03450	LGG_00733	ndk	nucleoside diphosphate kinase	3037	3264	2795	3032
LGG_RS03455	LGG_00734	NO NAME	hypothetical protein	2737	2665	2319	2573.67
LGG_RS03460	LGG_00735	ctpE	magnesium-transporting ATPase	10303	10190	10329	10274
LGG_RS03465	LGG_00736	pepR	prolyl aminopeptidase	3019	2677	2658	2784.67
LGG_RS03470	LGG_00737	NO NAME	hypothetical protein	3811	3368	3345	3508
LGG_RS03475	LGG_00738	wecD	acetyltransferase	2567	2318	2062	2315.67
LGG_RS03480	LGG_00739	napA	sodium:proton antiporter	5757	5461	5106	5441.33
LGG_RS03485	LGG_00740	gph	haloacid dehalogenase	4438	4071	3975	4161.33
LGG_RS03490	LGG_00741	NO NAME	MarR family transcriptional regulator	1624	1590	1534	1582.67
LGG_RS03495	LGG_00742	ybcH	alpha/beta hydrolase	3704	3334	3452	3496.67
LGG_RS03500	LGG_00743	nrdI	flavoprotein	3302	3086	2702	3030
LGG_RS03505	LGG_00744	dkgA	2%2C5-diketo-D-gluconic acid reductase	19522	15652	15306	16826.7
LGG_RS03510	LGG_00745	NO NAME	hypothetical protein	704	688	613	668.333
LGG_RS03515	LGG_00746	NO NAME	alpha/beta hydrolase	1370	1395	1248	1337.67
LGG_RS03520	LGG_00747	yviA	membrane protein	1038	922	931	963.667
LGG_RS03525	LGG_00748	NO NAME	hypothetical protein	623	615	570	602.667
LGG_RS03530	LGG_00749	metE	hypothetical protein	1020	1037	1001	1019.33
LGG_RS03535	LGG_00750	luxS	S-ribosylhomocysteinase	15188	13514	12970	13890.7
LGG_RS03540	LGG_00751	yjbF	membrane protein	1629	1575	1385	1529.67
LGG_RS03545	LGG_00752	ruvA	Holliday junction DNA helicase RuvA	1893	1847	1660	1800
LGG_RS03550	LGG_00753	ruvB	Holliday junction DNA helicase RuvB	4168	4034	3913	4038.33
LGG_RS03555	LGG_00754	queA	S-adenosylmethionine:tRNA ribosyltransferase-isomerase	5470	5372	5035	5292.33
LGG_RS03560	LGG_00755	tgt	queuine tRNA-ribosyltransferase	1721	1634	1524	1626.33
LGG_RS03565	LGG_00756	yajC	preprotein translocase subunit YajC	2243	2287	2136	2222
LGG_RS03570	LGG_00757	adhE	bifunctional acetaldehyde-CoA/alcohol dehydrogenase	4429	4130	4108	4222.33
LGG_RS03575	LGG_00759	sirR	Cro/Cl family transcriptional regulator	3115	2726	2880	2907
LGG_RS03580	LGG_00760	zwf	glucose-6-phosphate 1-dehydrogenase	7873	6724	7467	7354.67
LGG_RS03585	LGG_00761	dinB	DNA polymerase IV	1727	1611	1504	1614
LGG_RS03590	LGG_00762	ytoI	thioesterase	4648	4133	4301	4360.67
LGG_RS03595	LGG_00763	ytqI	phosphoesterase	3492	2879	2956	3109
LGG_RS03600	LGG_00764	rheB	DEAD/DEAH box helicase	7240	6669	6177	6695.33
LGG_RS03605	LGG_00765	NO NAME	hypothetical protein	3565	3384	3343	3430.67
LGG_RS03610	LGG_00766	NO NAME	hypothetical protein	843	825	846	838
LGG_RS03615	LGG_00767	alaS	alanyl-tRNA synthetase	13811	12795	12762	13122.7
LGG_RS03620	LGG_00768	NO NAME	hypothetical protein	558	536	502	532
LGG_RS03625	LGG_00769	alaRS	hypothetical protein	2412	2080	1831	2107.67
LGG_RS03630	LGG_00770	ruvX	Holliday junction DNA helicase	3647	3219	3098	3321.33
LGG_RS03635	LGG_00771	ybeC	hypothetical protein	2482	2182	2167	2277
LGG_RS03640	LGG_00772	NO NAME	cell division protein FtsZ	905	822	761	829.333
LGG_RS03645	LGG_00773	NO NAME	colicin V biosynthesis protein	1882	1657	1611	1716.67
LGG_RS03650	LGG_00774	mutS	DNA mismatch repair protein MutS	7030	6405	6249	6561.33
LGG_RS03655	LGG_00775	trxA	thioredoxin	2923	2615	2628	2722
LGG_RS03660	LGG_00776	dltX	cytochrome C553	946	843	554	781
LGG_RS03665	LGG_00777	dltA	D-alanine--poly(phosphoribitol) ligase subunit 1	5896	6202	5568	5888.67
LGG_RS03670	LGG_00778	dltB	D-alanyl-lipoteichoic acid biosynthesis protein DltB	3600	3728	3715	3681
LGG_RS03675	LGG_00779	dltC	D-alanine--poly(phosphoribitol) ligase subunit 2	1267	1302	1082	1217
LGG_RS03680	LGG_00780	dltD	cytochrome C552	3332	3477	3065	3291.33
LGG_RS03685	LGG_00781	yslB	yslB protein	972	918	948	946
LGG_RS03690	LGG_00782	murI	glutamate racemase	3331	3125	2913	3123
LGG_RS03695	LGG_00783	xerD	phosphodiesterase	982	892	876	916.667
LGG_RS03700	LGG_00784	glpF	glycerol uptake permease	462	476	422	453.333
LGG_RS03705	LGG_00785	ykuL	hypothetical protein	1738	1695	1624	1685.67
LGG_RS03710	LGG_00786	NO NAME	membrane protein	1457	1415	1450	1440.67
LGG_RS03715	LGG_00787	NO NAME	mechanosensitive ion channel protein MscS	1328	1273	1297	1299.33
LGG_RS03720	LGG_00789	NO NAME	chemotaxis protein	4721	3785	3326	3944
LGG_RS03725	LGG_00790	NO NAME	hypothetical protein	4055	3458	3421	3644.67
LGG_RS03730	LGG_00791	yrxA	transcriptional regulator	2357	2147	1814	2106
LGG_RS03735	LGG_00792	pepQ	dipeptidase	9049	7890	7351	8096.67
LGG_RS03740	LGG_00793	ccpA	catabolite control protein A	2640	2201	2270	2370.33
LGG_RS03745	LGG_00794	pbp1B	carboxypeptidase	4765	4713	4473	4650.33
LGG_RS03750	LGG_00796	yfnB	haloacid dehalogenase	2984	2929	2783	2898.67
LGG_RS03755	LGG_00797	birA	biotin--[acetyl-CoA-carboxylase] synthetase	2997	3090	2930	3005.67
LGG_RS03760	LGG_00798	pepV	dipeptidase PepV	7207	7359	6937	7167.67
LGG_RS03765	LGG_00799	NO NAME	glycerophosphoryl diester phosphodiesterase	1617	1701	1708	1675.33
LGG_RS03770	LGG_00800	NO NAME	hypothetical protein	332	307	291	310
LGG_RS03775	LGG_00801	NO NAME	membrane protein	1510	1431	1386	1442.33
LGG_RS03780	LGG_00802	NO NAME	membrane protein	1180	1052	1065	1099
LGG_RS03785	LGG_00803	NO NAME	metallophosphatase	2116	1881	1817	1938
LGG_RS03790	LGG_00804	yunD	5'-nucleotidase	6891	6208	6313	6470.67
LGG_RS03795	LGG_00805	yutD	transcriptional regulator	5936	5165	4609	5236.67
LGG_RS03800	LGG_00806	nagD	haloacid dehalogenase	5697	4951	4676	5108
LGG_RS03805	LGG_00807	NO NAME	membrane protein	1903	1758	1728	1796.33
LGG_RS03810	LGG_00808	dedA	membrane protein	3481	3273	3332	3362
LGG_RS03815	LGG_00809	ltrC	hypothetical protein	2164	2252	2104	2173.33
LGG_RS03820	LGG_00810	trxB	ferredoxin--NADP reductase	3443	3335	3369	3382.33
LGG_RS03825	LGG_00811	ppiB	peptidyl-prolyl cis-trans isomerase	857	816	836	836.333
LGG_RS03830	LGG_00812	yugI	general stress protein	1965	1796	1796	1852.33
LGG_RS03835	LGG_03015	16S rRNA	16S ribosomal RNA	0	0	0	0
LGG_RS03840	LGG_03005	23S rRNA	23S ribosomal RNA	0	0	0	0
LGG_RS03845	LGG_03010	5S rRNA	5S ribosomal RNA	0	0	0	0
LGG_RS03850	LGG_02946	tRNA-Val	tRNA-Val	0	0	0	0
LGG_RS03855	LGG_02947	tRNA-Lys	tRNA-Lys	95	113	76	94.6667
LGG_RS03860	LGG_02948	tRNA-Thr	tRNA-Thr	314	313	280	302.333
LGG_RS03865	LGG_02949	tRNA-Gly	tRNA-Gly	200	169	156	175
LGG_RS03870	LGG_02950	tRNA-Arg	tRNA-Arg	150	105	109	121.333
LGG_RS03875	LGG_02951	tRNA-Pro	tRNA-Pro	12	10	13	11.6667
LGG_RS03880	LGG_02952	tRNA-Met	tRNA-Met	16	29	35	26.6667
LGG_RS03885	LGG_02953	tRNA-Met	tRNA-Met	306	292	305	301
LGG_RS03890	LGG_02954	tRNA-Met	tRNA-Met	208	217	186	203.667
LGG_RS03895	LGG_02955	tRNA-Asp	tRNA-Asp	0	2	0	0.666667
LGG_RS03900	LGG_02956	tRNA-Phe	tRNA-Phe	73	68	80	73.6667
LGG_RS03905	LGG_02957	tRNA-Gly	tRNA-Gly	29	22	25	25.3333
LGG_RS03910	LGG_02958	tRNA-Ile	tRNA-Ile	27	28	30	28.3333
LGG_RS03915	LGG_02959	tRNA-Ser	tRNA-Ser	55	44	66	55
LGG_RS03920	LGG_02960	tRNA-Glu	tRNA-Glu	5	3	3	3.66667
LGG_RS03925	LGG_02961	tRNA-Ser	tRNA-Ser	20	12	29	20.3333
LGG_RS03930	LGG_02962	tRNA-Met	tRNA-Met	1	1	0	0.666667
LGG_RS03935	LGG_02963	tRNA-Asp	tRNA-Asp	40	26	35	33.6667
LGG_RS03940	LGG_02964	tRNA-Phe	tRNA-Phe	67	45	71	61
LGG_RS03945	LGG_02965	tRNA-Tyr	tRNA-Tyr	2	1	4	2.33333
LGG_RS03950	LGG_02966	tRNA-Trp	tRNA-Trp	33	22	35	30
LGG_RS03955	LGG_02967	tRNA-His	tRNA-His	38	35	34	35.6667
LGG_RS03960	LGG_02968	tRNA-Gln	tRNA-Gln	23	23	33	26.3333
LGG_RS03965	LGG_02969	tRNA-Cys	tRNA-Cys	181	138	197	172
LGG_RS03970	LGG_02970	tRNA-Leu	tRNA-Leu	299	217	276	264
LGG_RS03975	LGG_00823	NO NAME	DNA-directed RNA polymerase sigma-70 factor	765	635	677	692.333
LGG_RS03980	LGG_00824	ybeC	amino acid:proton symporter	1107	1042	973	1040.67
LGG_RS03985	LGG_00825	rfaG	glycosyl transferase	3024	2745	3045	2938
LGG_RS03990	LGG_00826	cpoA	glycosyltransferase	2866	2553	2855	2758
LGG_RS03995	LGG_00827	NO NAME	membrane protein	1342	1223	1374	1313
LGG_RS04000	LGG_00828	araT	aminotransferase A	2166	2076	1844	2028.67
LGG_RS04005	LGG_00829	ykuJ	hypothetical protein	2821	2856	2189	2622
LGG_RS04010	LGG_00830	ltaS	glycerol phosphate lipoteichoic acid synthase	7024	6843	6526	6797.67
LGG_RS04015	LGG_00831	perR	peptide ABC transporter substrate-binding protein	483	438	472	464.333
LGG_RS04020	LGG_03014	16S rRNA	16S ribosomal RNA	0	0	0	0
LGG_RS04025	LGG_03004	23S rRNA	23S ribosomal RNA	0	0	0	0
LGG_RS04030	LGG_03009	5S rRNA	5S ribosomal RNA	0	0	0	0
LGG_RS04035	LGG_02971	tRNA-Asn	tRNA-Asn	0	0	0	0
LGG_RS04040	LGG_02972	tRNA-Ser	tRNA-Ser	16	14	21	17
LGG_RS04045	LGG_02973	tRNA-Val	tRNA-Val	12	4	4	6.66667
LGG_RS04050	LGG_00841	NO NAME	hypothetical protein	549	561	522	544
LGG_RS04055	LGG_00842	metK	S-adenosylmethionine synthetase	7029	7660	7258	7315.67
LGG_RS04060	LGG_00843	mdr	multidrug MFS transporter	201	199	162	187.333
LGG_RS04065	LGG_00844	glnR	MerR family transcriptional regulator	298	281	254	277.667
LGG_RS04070	LGG_00845	lmrB	multidrug MFS transporter	508	528	441	492.333
LGG_RS04075	LGG_00846	NO NAME	hypothetical protein	466	513	415	464.667
LGG_RS04080	LGG_00847	NO NAME	phospholipid phosphatase	232	237	270	246.333
LGG_RS04085	LGG_00848	leuS	leucyl-tRNA synthetase	17950	18256	16583	17596.3
LGG_RS04090	LGG_00851	rfbX	transporter	4315	4210	4124	4216.33
LGG_RS04095	LGG_00852	rsuA	16S rRNA uridine-516 pseudouridylate synthase	4228	4324	3884	4145.33
LGG_RS04100	LGG_00853	yhcC	DNA-binding protein	1659	1529	1340	1509.33
LGG_RS04105	LGG_00854	ycfG	carbohydrate kinase	6245	5805	5591	5880.33
LGG_RS04110	LGG_00855	NO NAME	NUDIX hydrolase	4047	3572	3393	3670.67
LGG_RS04115	LGG_02999	tRNA-Leu	tRNA-Leu	15	7	10	10.6667
LGG_RS04120	LGG_00856	bsaA	glutathione peroxidase	409	333	294	345.333
LGG_RS04125	LGG_00857	malY	aminotransferase	1102	1043	929	1024.67
LGG_RS04130	pseudo-gene	NO NAME	phosphohydrolase	1529	1359	1305	1397.67
LGG_RS04135	LGG_00860	gcvR	hypothetical protein	312	328	289	309.667
LGG_RS04140	LGG_00861	NO NAME	hypothetical protein	2016	2108	1895	2006.33
LGG_RS04145	LGG_00862	coiA	competence protein	382	415	367	388
LGG_RS04150	LGG_00863	NO NAME	dihydroorotate dehydrogenase	1337	1303	1256	1298.67
LGG_RS04155	LGG_00864	NO NAME	adenylate cyclase	1055	904	847	935.333
LGG_RS04160	LGG_00865	relA	GTP pyrophosphokinase	1886	1762	1679	1775.67
LGG_RS04165	LGG_00866	ppnK	inorganic polyphosphate/ATP-NAD kinase	2173	1999	2026	2066
LGG_RS04170	LGG_00867	rluD	pseudouridine synthase	1868	1656	1667	1730.33
LGG_RS04175	LGG_00868	apbE	thiamine biosynthesis protein	2388	2216	2079	2227.67
LGG_RS04180	LGG_00869	cutC	copper homeostasis protein CutC	2326	2566	2260	2384
LGG_RS04185	LGG_00870	bacA	UDP-diphosphatase	2461	2535	2147	2381
LGG_RS04190	LGG_00871	ykgB	hypothetical protein	4283	3686	3779	3916
LGG_RS04195	LGG_00872	pts	PTS glucose transporter subunit IIABC	1823	1722	1593	1712.67
LGG_RS04200	LGG_00873	rpsN	30S ribosomal protein S14	3471	2924	3445	3280
LGG_RS04205	LGG_00874	guaC	GMP reductase	10800	8983	10457	10080
LGG_RS04210	LGG_00875	corA	magnesium transporter	1265	1131	1186	1194
LGG_RS04215	LGG_00876	rrmA	SAM-dependent methyltransferase	294	245	243	260.667
LGG_RS04220	LGG_00878	cspR	RNA methyltransferase	1828	1691	1708	1742.33
LGG_RS04225	LGG_00879	yqaD	hypothetical protein	3030	2767	2463	2753.33
LGG_RS04230	LGG_00882	ftsK	cell division protein FtsK	8316	8192	7888	8132
LGG_RS04235	LGG_00883	NO NAME	Zn-dependent peptidase	4089	3968	3744	3933.67
LGG_RS04240	LGG_00884	ymfH	zinc protease	3949	3795	3606	3783.33
LGG_RS04245	LGG_00885	fabG	3-oxoacyl-ACP reductase	1959	1782	1809	1850
LGG_RS04250	LGG_00886	NO NAME	XRE family transcriptional regulator	9121	8663	8515	8766.33
LGG_RS04255	LGG_00887	pgsA	CDP-diacylglycerol--glycerol-3-phosphate 3-phosphatidyltransferase	5193	4818	5011	5007.33
LGG_RS04260	LGG_00888	cinA	damage-inducible protein A	3150	2658	2549	2785.67
LGG_RS04265	LGG_00889	recA	recombinase RecA	2977	2587	2311	2625
LGG_RS04270	LGG_00892	cvfA	ribonuclease	22610	19482	18539	20210.3
LGG_RS04275	LGG_00893	yigZ	hypothetical protein	674	667	594	645
LGG_RS04280	LGG_00894	comFA	competence protein ComF	50	41	56	49
LGG_RS04285	not predicted	NO NAME	competence protein ComF	12	19	12	14.3333
LGG_RS04290	LGG_00896	yfiA	sigma-54 modulation protein	9897	7992	8288	8725.67
LGG_RS04295	LGG_00899	secA	preprotein translocase subunit SecA	39737	37030	36031	37599.3
LGG_RS04300	LGG_00900	prfB	peptide chain release factor 2	11053	10587	10241	10627
LGG_RS04305	LGG_00901	ftsE	cell division protein FtsE	5962	5748	5567	5759
LGG_RS04310	LGG_00902	ftsX	cell division protein FtsX	5221	5367	4877	5155
LGG_RS04315	LGG_00903	NO NAME	cell division protein MinJ	3485	3050	3253	3262.67
LGG_RS04320	LGG_00904	phoP2	two-component system response regulator	3421	3060	3166	3215.67
LGG_RS04325	LGG_00905	phoR2	signal transduction histidine kinase	3113	3060	2930	3034.33
LGG_RS04330	LGG_00906	pstS	phosphate-binding protein	1667	1586	1530	1594.33
LGG_RS04335	LGG_00907	pstC	phosphate ABC transporter permease	2542	2400	2240	2394
LGG_RS04340	LGG_00908	pstA	phosphate ABC transporter permease	2109	2019	2145	2091
LGG_RS04345	LGG_00909	pstB	phosphate ABC transporter ATP-binding protein	3745	3543	3518	3602
LGG_RS04350	LGG_00910	pstB	phosphate ABC transporter ATP-binding protein	4290	3976	3806	4024
LGG_RS04355	LGG_00911	phoU	PhoU family transcriptional regulator	3394	3087	3066	3182.33
LGG_RS04360	LGG_00912	is33	transposase	224	194	202	206.667
LGG_RS04365	LGG_00913	is34	transposase	106	91	91	96
LGG_RS04370	LGG_00914	NO NAME	hypothetical protein	6693	5675	5543	5970.33
LGG_RS04375	LGG_00915	NO NAME	hypothetical protein	404	366	411	393.667
LGG_RS04380	LGG_00916	NO NAME	membrane protein	1225	983	1174	1127.33
LGG_RS04385	LGG_00917	hprK	HPr kinase/phosphorylase	7249	6886	6344	6826.33
LGG_RS04390	LGG_00918	lgt	prolipoprotein diacylglyceryl transferase	6756	6391	5985	6377.33
LGG_RS04395	LGG_00919	gpsA	glycerol-3-phosphate dehydrogenase	8377	8109	7599	8028.33
LGG_RS04400	LGG_00920	trxB	thioredoxin reductase	14635	13679	13251	13855
LGG_RS04405	LGG_00921	pgm	phosphoglucomutase	35294	30490	34102	33295.3
LGG_RS04410	LGG_00922	NO NAME	hydrolase	2635	2331	2306	2424
LGG_RS04415	LGG_00923	uvrB	excinuclease ABC subunit B	9678	8612	8426	8905.33
LGG_RS04420	LGG_00924	uvrA	excinuclease ABC subunit A	9159	8884	8696	8913
LGG_RS04425	LGG_00925	NO NAME	membrane protein	1742	1611	1675	1676
LGG_RS04430	LGG_00927	NO NAME	ATPase P	5804	5279	5095	5392.67
LGG_RS04435	LGG_00928	yvcK	hypothetical protein	8831	8308	7761	8300
LGG_RS04440	LGG_00929	yvcL	sporulation regulator WhiA	5645	5112	5035	5264
LGG_RS04445	LGG_00930	ohrR	MarR family transcriptional regulator	3621	3299	3396	3438.67
LGG_RS04450	LGG_00931	clpP	ATP-dependent Clp protease proteolytic subunit	20315	18540	17188	18681
LGG_RS04455	LGG_02974	tRNA-Arg	tRNA-Arg	354	312	267	311
LGG_RS04460	LGG_00932	cggR	SorC family transcriptional regulator	49957	38298	49241	45832
LGG_RS04465	LGG_00933	gapA	glyceraldehyde-3-phosphate dehydrogenase	354940	305871	368217	343009
LGG_RS04470	LGG_00934	pgk	phosphoglycerate kinase	205451	203115	223437	210668
LGG_RS04475	LGG_00935	tpiA	triosephosphate isomerase	188042	179213	180792	182682
LGG_RS04480	LGG_00936	eno	enolase	355363	345879	364852	355365
LGG_RS04485	LGG_00937	NO NAME	hypothetical protein	792	809	741	780.667
LGG_RS04490	LGG_00938	eriC	ATP synthase F0 subunit A	2886	2673	2450	2669.67
LGG_RS04495	LGG_00939	NO NAME	hypothetical protein	788	719	707	738
LGG_RS04500	LGG_00940	secG	preprotein translocase subunit SecG	1853	1738	1541	1710.67
LGG_RS04505	LGG_00941	yvaK	esterase	3506	2885	2588	2993
LGG_RS04510	LGG_00942	rnr	exoribonuclease R	17381	15391	16112	16294.7
LGG_RS04515	LGG_00943	smpB	SsrA-binding protein	4332	3990	3717	4013
LGG_RS04520	LGG_00944	nplT	neopullulanase	2032	1932	1746	1903.33
LGG_RS04525	LGG_00945	mapA	maltose phosphorylase	2704	2580	2356	2546.67
LGG_RS04530	LGG_00946	pgmB	beta-phosphoglucomutase	597	461	500	519.333
LGG_RS04535	LGG_00947	NO NAME	hypothetical protein	605	572	567	581.333
LGG_RS04540	LGG_00948	NO NAME	DNA-binding protein	410	334	407	383.667
LGG_RS04545	LGG_00949	NO NAME	MBL fold hydrolase	3059	2965	2875	2966.33
LGG_RS04550	LGG_00950	NO NAME	hypothetical protein	0	0	0	0
LGG_RS04555	LGG_00951	malE	ABC transporter substrate-binding protein	42041	48779	38978	43266
LGG_RS04560	LGG_00952	malF	sugar ABC transporter permease	20657	23703	21270	21876.7
LGG_RS04565	LGG_00953	malG	ABC transporter permease	19005	21419	21240	20554.7
LGG_RS04570	LGG_00954	malK	ABC transporter ATP-binding protein	25738	28173	26097	26669.3
LGG_RS04575	LGG_00955	NO NAME	GNAT family acetyltransferase	344	328	314	328.667
LGG_RS04580	LGG_00956	NO NAME	hypothetical protein	1558	1334	1505	1465.67
LGG_RS04585	LGG_00957	ycsE	haloacid dehalogenase	4059	3316	3574	3649.67
LGG_RS04590	LGG_00958	ung	uracil-DNA glycosylase	2875	2668	2499	2680.67
LGG_RS04595	LGG_00959	pta	phosphotransacetylase	6863	6030	6035	6309.33
LGG_RS04600	LGG_00960	yeeE	tRNA threonylcarbamoyladenosine biosynthesis protein TsaE	2555	2330	2390	2425
LGG_RS04605	LGG_00961	natA	sodium ABC transporter ATP-binding protein	2919	2940	2476	2778.33
LGG_RS04610	LGG_00962	natB	ABC transporter permease	3317	3364	3264	3315
LGG_RS04615	LGG_00963	dnaQ	DNA polymerase III subunit alpha	1059	961	1036	1018.67
LGG_RS04620	LGG_00964	exoA	exodeoxyribonuclease III	1498	1234	1355	1362.33
LGG_RS04625	LGG_00965	NO NAME	hypothetical protein	0	0	0	0
LGG_RS04630	LGG_00966	murB	UDP-N-acetylenolpyruvoylglucosamine reductase	9034	7824	7822	8226.67
LGG_RS04635	LGG_00967	NO NAME	sodium:proton antiporter	4476	3938	4216	4210
LGG_RS04640	LGG_00968	NO NAME	Cro/Cl family transcriptional regulator	2164	1813	1614	1863.67
LGG_RS04645	LGG_00969	potA	spermidine/putrescine ABC transporter ATP-binding protein	2379	2158	2126	2221
LGG_RS04650	LGG_00970	potB	spermidine/putrescine ABC transporter permease	1159	1041	1023	1074.33
LGG_RS04655	LGG_00971	potC	spermidine/purescine ABC transporter permease	1298	1332	1254	1294.67
LGG_RS04660	LGG_00972	potD	spermidine/putrescine ABC transporter substrate-binding protein	2001	1875	1679	1851.67
LGG_RS04665	LGG_00973	NO NAME	hypothetical protein	743	722	635	700
LGG_RS04670	LGG_00974	NO NAME	hypothetical protein	348	313	324	328.333
LGG_RS04675	LGG_00975	NO NAME	hypothetical protein	160	139	116	138.333
LGG_RS04680	LGG_00976	pacL	haloacid dehalogenase	11794	12254	11360	11802.7
LGG_RS04685	LGG_00977	NO NAME	TetR family transcriptional regulator	648	706	623	659
LGG_RS04690	LGG_00978	NO NAME	ABC transporter permease	1082	1081	931	1031.33
LGG_RS04695	LGG_00979	yhiH	ABC transporter ATP-binding protein	513	575	458	515.333
LGG_RS04700	LGG_00980	ossG	membrane protein	2819	2654	2600	2691
LGG_RS04705	LGG_00981	NO NAME	hypothetical protein	5984	5355	5081	5473.33
LGG_RS04710	LGG_00982	glmM	phosphoglucosamine mutase	3976	3881	3245	3700.67
LGG_RS04715	LGG_00983	glmS	glucosamine--fructose-6-phosphate aminotransferase	13540	13656	11413	12869.7
LGG_RS04720	LGG_00984	pepF	oligoendopeptidase	13922	11148	11461	12177
LGG_RS04725	LGG_00985	NO NAME	membrane protein	158	186	149	164.333
LGG_RS04730	LGG_00986	yebC	transcriptional regulator	11347	10897	9038	10427.3
LGG_RS04735	LGG_00987	comGA	type II secretory pathway protein	114	106	101	107
LGG_RS04740	LGG_00988	gomGB	type II secretion system protein F	169	160	136	155
LGG_RS04745	LGG_00989	gomGC	competence protein ComGC	17	27	30	24.6667
LGG_RS04750	LGG_00990	NO NAME	competence protein ComGC	45	42	33	40
LGG_RS04755	LGG_00991	NO NAME	hypothetical protein	27	27	22	25.3333
LGG_RS04760	LGG_00992	NO NAME	hypothetical protein	67	67	70	68
LGG_RS04765	LGG_00993	NO NAME	hypothetical protein	49	51	32	44
LGG_RS04770	LGG_00994	laaG	lactate dehydrogenase	7052	6337	6563	6650.67
LGG_RS04775	LGG_00995	NO NAME	hypothetical protein	701	712	706	706.333
LGG_RS04780	LGG_00996	cycA	alanine glycine permease	2555	2463	2369	2462.33
LGG_RS04785	LGG_00997	arbV	1-acyl-sn-glycerol-3-phosphate acyltransferase	1201	1278	1235	1238
LGG_RS04790	LGG_00998	arbX	glycosyl transferase	818	743	844	801.667
LGG_RS04795	LGG_00999	arbY	glycosyl transferase	1099	1067	1123	1096.33
LGG_RS04800	LGG_01000	arbZ	1-acyl-sn-glycerol-3-phosphate acyltransferase	828	743	722	764.333
LGG_RS04805	LGG_01001	galA	alpha-galactosidase	3651	2900	2981	3177.33
LGG_RS04810	LGG_01002	NO NAME	membrane protein	2636	2463	2115	2404.67
LGG_RS04815	LGG_01003	phoP3	two-component system response regulator	6072	5540	4999	5537
LGG_RS04820	LGG_01004	phoR3	two-component system sensor histidine kinase	8662	8212	7938	8270.67
LGG_RS04825	LGG_01005	NO NAME	acetyltransferase	2357	2399	2224	2326.67
LGG_RS04830	LGG_01006	NO NAME	hypothetical protein	630	569	591	596.667
LGG_RS04835	LGG_01007	pheB	hypothetical protein	1147	1099	999	1081.67
LGG_RS04840	LGG_01008	NO NAME	hypothetical protein	979	868	832	893
LGG_RS04845	LGG_01009	NO NAME	acetyl-CoA carboxylase	115	99	99	104.333
LGG_RS04850	LGG_01010	umuC	type VI secretion protein ImpB	448	443	479	456.667
LGG_RS04855	not predicted	NO NAME	hypothetical protein	711	665	700	692
LGG_RS04860	LGG_01012	NO NAME	membrane protein	2301	2347	2093	2247
LGG_RS04865	LGG_01013	NO NAME	lysophospholipase	845	858	896	866.333
LGG_RS04870	LGG_01014	NO NAME	membrane protein	287	321	290	299.333
LGG_RS04875	LGG_01015	pcrA	ATP-dependent DNA helicase PcrA	8384	8689	8218	8430.33
LGG_RS04880	LGG_01016	ligA	NAD-dependent DNA ligase LigA	6863	7041	7236	7046.67
LGG_RS04885	LGG_01017	camS	CamS family sex pheromone protein	6071	6196	6025	6097.33
LGG_RS04890	LGG_01018	gatC	glutamyl-tRNA amidotransferase subunit C	4863	4892	4289	4681.33
LGG_RS04895	LGG_01019	gatA	aspartyl/glutamyl-tRNA amidotransferase subunit A	19702	20492	20884	20359.3
LGG_RS04900	LGG_01020	gatB	aspartyl/glutamyl-tRNA amidotransferase subunit B	20687	21978	21335	21333.3
LGG_RS04905	LGG_01021	yerQ	lipid kinase	3402	3124	2801	3109
LGG_RS04910	LGG_01022	rumA	RNA methyltransferase	5461	5279	5222	5320.67
LGG_RS04915	pseudo-gene	NO NAME	hypothetical protein	2978	2907	2543	2809.33
LGG_RS04920	LGG_01025	is36	transposase	0	0	0	0
LGG_RS04925	pseudo-gene	NO NAME	DNA methylase	1009	982	859	950
LGG_RS04930	LGG_01027	res	type III restriction endonuclease StyLTI	986	895	868	916.333
LGG_RS04935	LGG_01029	is37	transposase	0	4	3	2.33333
LGG_RS04940	LGG_01030	yttB	MFS transporter permease	267	269	263	266.333
LGG_RS04945	LGG_01031	NO NAME	haloacid dehalogenase	401	395	411	402.333
LGG_RS04950	LGG_01032	murQ	hypothetical protein	2721	2640	2436	2599
LGG_RS04955	LGG_01033	pepO	endopeptidase	7619	7227	6991	7279
LGG_RS04960	LGG_01034	NO NAME	acetyltransferase	808	854	823	828.333
LGG_RS04965	LGG_01036	degV	hypothetical protein	2520	2586	2451	2519
LGG_RS04970	LGG_01037	hflC	hypothetical protein	3514	3170	3495	3393
LGG_RS04975	LGG_01038	NO NAME	hypothetical protein	1232	1182	973	1129
LGG_RS04980	LGG_01039	NO NAME	lyzozyme M1 (1%2C4-beta-N-acetylmuramidase)	344	334	323	333.667
LGG_RS04985	LGG_01040	NO NAME	hypothetical protein	422	450	368	413.333
LGG_RS04990	LGG_01042	NO NAME	hypothetical protein	578	594	495	555.667
LGG_RS04995	LGG_01043	ygjR	alanine-phosphoribitol ligase	4074	3699	3720	3831
LGG_RS05000	LGG_01044	rhe	helicase	5282	5136	4781	5066.33
LGG_RS05005	LGG_01045	pts	PTS cellobiose transporter subunit IIA	2753	2571	2651	2658.33
LGG_RS05010	LGG_01047	NO NAME	hypothetical protein	2119	1973	2132	2074.67
LGG_RS05015	LGG_02975	tRNA-Arg	tRNA-Arg	71	86	108	88.3333
LGG_RS05020	LGG_01048	NO NAME	hypothetical protein	432	412	421	421.667
LGG_RS05025	LGG_01049	recQ	ATP-dependent DNA helicase RecQ	1575	1468	1494	1512.33
LGG_RS05030	LGG_01050	ampS	peptidase	570	569	510	549.667
LGG_RS05035	LGG_01051	NO NAME	TetR family transcriptional regulator	656	637	498	597
LGG_RS05040	LGG_01053	NO NAME	hypothetical protein	3137	2856	2748	2913.67
LGG_RS05045	LGG_01054	NO NAME	hypothetical protein	601	497	517	538.333
LGG_RS05050	LGG_01055	fldA	flavodoxin	2016	1902	1819	1912.33
LGG_RS05055	LGG_01056	map	methionine aminopeptidase	5604	5051	4912	5189
LGG_RS05060	LGG_01057	NO NAME	glycosyl transferase family 2	5636	5580	5013	5409.67
LGG_RS05065	LGG_01059	NO NAME	hypothetical protein	359	397	494	416.667
LGG_RS05070	LGG_01060	NO NAME	hypothetical protein	588	582	604	591.333
LGG_RS05075	LGG_01061	mvaK	phosphomevalonate kinase	8466	7879	7810	8051.67
LGG_RS05080	LGG_01062	galU	UTP--glucose-1-phosphate uridylyltransferase	25603	23293	22387	23761
LGG_RS05085	LGG_01063	NO NAME	hypothetical protein	157	140	124	140.333
LGG_RS05090	LGG_01064	bglA	6-phospho-beta-glucosidase	115	97	112	108
LGG_RS05095	LGG_01065	bglH	PTS beta-glucoside transporter subunit IIABC	61	51	43	51.6667
LGG_RS05100	LGG_01066	NO NAME	membrane protein	2275	2370	2023	2222.67
LGG_RS05105	LGG_01068	NO NAME	hypothetical protein	1225	1151	1207	1194.33
LGG_RS05110	LGG_01069	gtrB	glucosyl transferase family 2	2523	2350	2525	2466
LGG_RS05115	LGG_01070	NO NAME	hypothetical protein	1545	1502	1385	1477.33
LGG_RS05120	LGG_01071	NO NAME	membrane protein	366	301	315	327.333
LGG_RS05125	LGG_01072	cspC	cold-shock protein	5602	5154	5875	5543.67
LGG_RS05130	LGG_01073	NO NAME	hypothetical protein	318	273	270	287
LGG_RS05135	LGG_01074	NO NAME	GNAT family acetyltransferase	1013	844	890	915.667
LGG_RS05140	LGG_01075	acmA	N-acetylmuramidase	1428	1266	1247	1313.67
LGG_RS05145	LGG_01076	xpt	xanthine phosphoribosyltransferase	4298	4142	3879	4106.33
LGG_RS05150	LGG_01077	pbuX	xanthine permease	10124	10219	9462	9935
LGG_RS05155	LGG_01078	purK	phosphoribosylaminoimidazole carboxylase	10194	10134	9795	10041
LGG_RS05160	LGG_01079	purB	adenylosuccinate lyase	13985	13672	13262	13639.7
LGG_RS05165	LGG_01080	NO NAME	branched-chain amino acid ABC transporter ATP-binding protein	767	644	689	700
LGG_RS05170	LGG_01081	NO NAME	hypothetical protein	1102	1048	1053	1067.67
LGG_RS05175	LGG_01082	ltaS	alkaline phosphatase	2651	3097	2681	2809.67
LGG_RS05180	LGG_01083	vanZ	glycopeptide antibiotics resistance protein	968	912	912	930.667
LGG_RS05185	LGG_01084	glcU	glucose transporter GlcU	1653	1549	1570	1590.67
LGG_RS05190	LGG_01085	pgi	glucose-6-phosphate isomerase	75300	68844	73226	72456.7
LGG_RS05195	LGG_01086	int	integrase	260	235	217	237.333
LGG_RS05200	LGG_01087	NO NAME	hypothetical protein	618	584	544	582
LGG_RS05205	LGG_01088	NO NAME	hypothetical protein	4415	4646	3889	4316.67
LGG_RS05210	LGG_01089	NO NAME	hypothetical protein	1166	1223	1012	1133.67
LGG_RS05215	LGG_01090	NO NAME	pyridoxamine 5-phosphate oxidase	2491	2647	2175	2437.67
LGG_RS05220	LGG_01091	NO NAME	hypothetical protein	2172	2423	1850	2148.33
LGG_RS05225	LGG_01092	NO NAME	hypothetical protein	6708	6401	5793	6300.67
LGG_RS05230	LGG_01093	NO NAME	hypothetical protein	6446	6146	5277	5956.33
LGG_RS05235	LGG_01094	NO NAME	toxin	2294	2184	2052	2176.67
LGG_RS05240	LGG_01095	Cpg	Cro/Cl family transcriptional regulator	1684	1470	1424	1526
[truncated: 1,770 more rows]

## Sheet: diff expr GG vs PS24 OD2
Gene name	Old locus tag	Gene name	Gene product	Av read count	Log2 fold	Error estimate	-	P value	Q value
[truncated: 2,817 more rows]

[truncated: 1 more sheets: diff expr GG vs PS24 OD7]
